# Supplementary material for: Halo-perfluoroalkoxylation of gem -difluoroalkenes with short-lived alkali metal perfluoroalkoxides in triglyme
Source: Royal Society of Chemistry journal article supplement (doi:10.1039/d4sc02084g), 2024-01-01

## Electronic supplementary information (ESI)

### Halo-perfluoroalkoxylation of *gem*-difluoroalkenes with short-lived alkali metal perfluoroalkoxides in triglyme

Koki Kawai<sup>1</sup>, Yoshimitsu Kato<sup>2</sup>, Taichi Araki<sup>2</sup>, Sota Ikawa<sup>2</sup>, Mai Usui<sup>2</sup>, Naoyuki Hoshiya<sup>3</sup>, Yosuke Kishikawa<sup>3</sup>, Jorge Escorihuela<sup>4</sup>, and Norio Shibata<sup>1,2</sup>

<sup>1</sup> Department of Nanopharmaceutical Sciences, and Department of Life Science and Applied Chemistry, Nagoya Institute of Technology, Gokiso, Showa-ku, Nagoya 466-8555, Japan.

<sup>2</sup> Department of Life Science and Applied Chemistry Nagoya Institute of Technology Gokiso, Showa-ku, Nagoya 466-8555, Japan

<sup>3</sup> Technology Innovation Center DAIKIN Industries, Ltd. 1-1 Nishi-Hitotsuya, Settsu, Osaka 566-8585, Japan

<sup>4</sup> Departamento de Química Orgánica, Universitat de València Avda. Vicente Andrés Estellés s/n, Burjassot 46100, Valencia, Spain

\*E-mail: [nozshiba@nitech.ac.jp](mailto:nozshiba@nitech.ac.jp)

### CONTENTS

|                                                                                  |    |
|----------------------------------------------------------------------------------|----|
| 1. General information .....                                                     | 1  |
| 2. Optimization for Chloro-perfluoroalkoxylation.....                            | 2  |
| 3. Preparation of fluoroalkenes .....                                            | 2  |
| 4. Iodo-perfluoroalkoxylation of <i>gem</i> -difluoroalkenes 1 .....             | 5  |
| 5. Bromo-perfluoroalkoxylation of <i>gem</i> -difluoroalkenes 1 .....            | 10 |
| 6. Bromo-perfluoroalkoxylation (C3 to C5) of <i>gem</i> -difluoroalkenes 1 ..... | 14 |
| 7. Chloro-perfluoroalkoxylation of <i>gem</i> -difluoroalkenes 1 .....           | 16 |
| 8. Synthetic application of compound 3aa .....                                   | 18 |
| 9. Computational details.....                                                    | 21 |
| 10. References .....                                                             | 34 |
| 11. NMR data .....                                                               | 35 |

#### 1. General information

All reactions were performed in oven-dried glassware under positive pressure of nitrogen unless otherwise mentioned. Solvents were transferred via syringe and were introduced into the reaction vessels through a rubberseptum. All of the reactions were monitored by thin-layer chromatography (TLC) carried out on 0.25 mm Merck silica gel (60-F<sub>254</sub>). The TLC plates were visualized with UV light and KMnO<sub>4</sub> in water/heat. Column chromatography was carried out on columns packed with silica gel (60N spherical neutral size 63-210 nm). The <sup>1</sup>H NMR (500 MHz), <sup>19</sup>F NMR (282 MHz), <sup>13</sup>C NMR (126 MHz) spectra for solution in CDCl<sub>3</sub> were recorded on a Varian 300 and a Bruker Avance 500. Chemical shifts (δ) are expressed in ppm downfield from TMS (δ = 0.00 ppm for <sup>1</sup>H NMR), C<sub>6</sub>F<sub>6</sub> (δ = -162.2 ppm for <sup>19</sup>F NMR) or CDCl<sub>3</sub> (77.16 ppm for <sup>13</sup>C NMR) as an internal standard. Mass spectra were recorded on a JEOL JMS-T2000GC (EI-MS) and SHIMAZU LCMS-2020 (ESI-MS) and JEOL JMS-700 (FAB-MS). Melting points were recorded on Buchi M-565. Infrared spectra were recorded on a JASCO FT/IR-4100 spectrometer. Chemicals were purchased and used without further purification unless otherwise noted. Solvent triglyme was dried over activated MS-4A before use. Potassium Fluoride (KF, spray dried) was purchased from FUJIFILM Wako Pure Chemical Corporation and dried overnight at 200 °C under reduced pressure and stored in Glove Box.

## 2. Optimization for Chloro-perfluoroalkoxylation

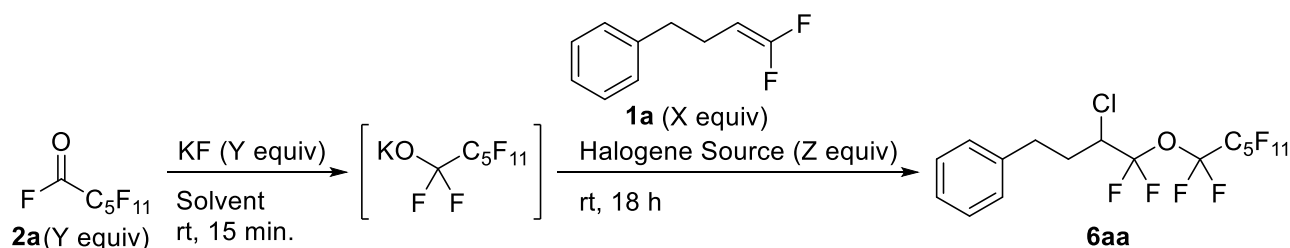

| Entry     | <b>1a</b><br>(X equiv) | <b>2a</b><br>(Y equiv) | Halo-source<br>(Z equiv) | Solvent (0.1 M)        | Yield (%) <sup>a</sup> |
|-----------|------------------------|------------------------|--------------------------|------------------------|------------------------|
| 1         | 1.0                    | 1.0                    | TCCA (1.0)               | Triglyme               | 56 (57)                |
| 2         | 1.0                    | 1.0                    | NCS (1.0)                | Triglyme               | 0                      |
| 3         | 1.0                    | 1.0                    | DCDMH (1.0)              | Triglyme               | 0                      |
| 4         | 1.0                    | -                      | TCCA (1.0)               | Triglyme               | -                      |
| 5         | 1.0                    | 1.0                    | TCCA (1.0)               | Triglyme (40 °C)       | 52                     |
| 6         | 1.0                    | 1.0                    | TCCA (0.33)              | Triglyme               | 32                     |
| 7         | 1.0                    | 1.0                    | TCCA (0.67)              | Triglyme               | 54                     |
| <b>8</b>  | <b>1.0</b>             | <b>1.5</b>             | <b>TCCA (1.0)</b>        | <b>Triglyme</b>        | <b>72</b>              |
| 9         | 1.0                    | 1.5                    | TCCA (1.5)               | Triglyme               | 65                     |
| 10        | 1.0                    | 2.0                    | TCCA (1.0)               | Triglyme               | 73                     |
| <b>11</b> | <b>2.0</b>             | <b>1.0</b>             | <b>TCCA (1.0)</b>        | <b>Triglyme</b>        | <b>73</b>              |
| 12        | 2.0                    | 1.0                    | TCCA (1.5)               | Triglyme               | 58                     |
| 13        | 1.0                    | 1.0                    | TCCA (1.0)               | Triglyme/Toluene (1:1) | 29                     |

Reaction conditions: **1a**, **2a**, KF, Halogen source, solvent (1.0 mL), room temperature for 24 h. 0.1 mmol scale. <sup>a</sup> <sup>19</sup>F NMR yields were determined using C<sub>6</sub>F<sub>6</sub> as an internal standard.

## 3. Preparation of fluoroalkenes

### 3-1. General procedure A

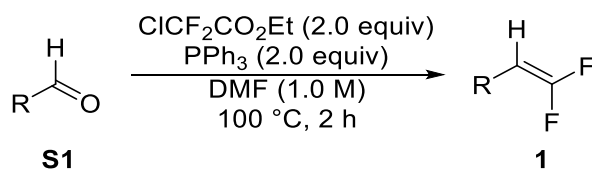

Sodium 2-chloro-2,2-difluoroacetate (2.0 equiv) was added in the mixture of corresponding aldehyde **S1** (1.0 equiv) and Triphenyl phosphine (2.0 equiv) in DMF (1.0 M), the reaction was heated at 100 °C and kepted at this temperature until no further evolution of CO<sub>2</sub> was observed. Then the reaction mixture was cooled to rt, and water was added to the reaction slowly, the mixture was extracted with Et<sub>2</sub>O 3 times. The combined organic layer was washed with brine, dried over Na<sub>2</sub>SO<sub>4</sub>, filtrated, and concentrated in vacuo. The residue was purified by flash column chromatography to afford the difluoroalkenes **1**<sup>1-3</sup>.

### 3-2. General procedure B

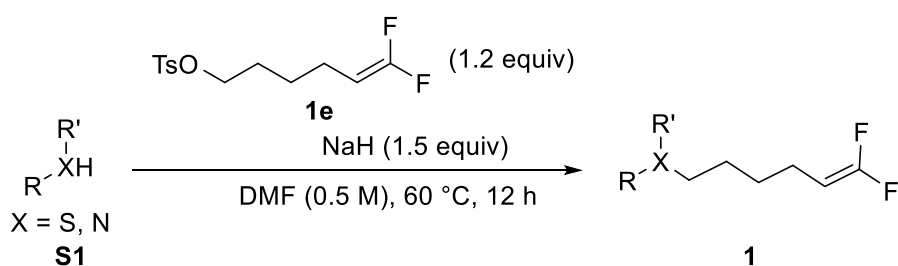

**S1** was suspended in DMF (0.5 M). Then, NaH (1.0 equiv, 60% dispersion in Paraffin Liquid) was added in the solution. The reaction was stirred at room temperature for 15 min. To the above mixture, 6,6-difluorohept-5-en-1-yl 4-methylbenzenesulfonate (**1e**: 1.2 equiv) was added and the reaction mixture was stirred at 60 °C for 12 h under nitrogen gas. The solution was cooled to 0 °C and was quenched with NH<sub>4</sub>Cl aq. The mixture was extracted with EtOAc 3 times, and the combined organic was washed with brine, dried over Na<sub>2</sub>SO<sub>4</sub>, filtered and concentrated. The residue was purified by flash column chromatography to afford the difluoroalkenes **1**<sup>4-6</sup>.

#### 4-(((5,5-difluoropent-4-en-1-yl)oxy)methyl)-1,1'-biphenyl (**1b**)

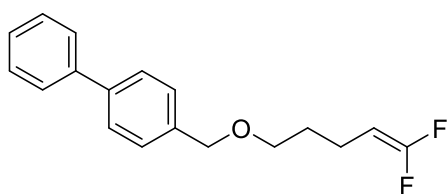

**1b** (599 mg, 2.1 mmol, 44% yield) was obtained by **General Procedure A** using aldehyde **S1b** (1.19 g, 4.7 mmol, 1.0 equiv), Triphenyl phosphine (2.47 g, 9.4 mmol, 2.0 equiv), Sodium 2-chloro-2, 2-difluoroacetate (1.43 g, 9.4 mmol, 2.0 equiv). The crude **1b** was purified by flash chromatography on silica gel (Hexane). Colorless oil.

**HRMS (FAB) *m/z***: [M + H]<sup>+</sup> calculated for C<sub>18</sub>H<sub>19</sub>F<sub>2</sub>O 289.1404; found: 289.1403. **<sup>1</sup>H**

**NMR** (500 MHz, CDCl<sub>3</sub>) δ 7.59 – 7.56 (m, 4H), 7.44 – 7.39 (m, 4H), 7.35 – 7.32 (m, 1H), 4.53 (s, 2H), 4.18 – 4.10 (m, 1H), 3.51 – 3.49 (m, 2H), 2.12 – 2.08 (m, 2H), 1.73 – 1.67 (quin, *J* = 7.0 Hz, 2H). **<sup>13</sup>C NMR** (126 MHz, CDCl<sub>3</sub>) δ 156.5 (t, *J* = 285.6 Hz), 141.0, 140.7, 137.6, 128.9 (2C), 128.2 (2C), 127.4, 127.3 (2C), 127.2 (2C), 77.7 (t, *J* = 21.3 Hz), 72.9, 69.4, 29.6, 19.2 (d, *J* = 4.5 Hz). **<sup>19</sup>F NMR** (282 MHz, CDCl<sub>3</sub>) δ -89.6 (d, *J* = 47.6 Hz, 1F), -92.0 (dd, *J* = 48.1, 25.3 Hz, 1F). **IR (KBr)**: 3478, 2943, 2859, 2340, 1910, 1748, 1227, 1104, 764, 700 cm<sup>-1</sup>.

#### 1-(6,6-difluorohex-5-en-1-yl)indoline-2,3-dione (**1f**)

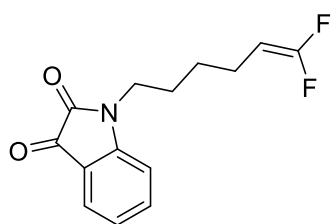

**1f** (448 mg, 1.2 mmol, 68% yield) was obtained by **General Procedure B** using Isatin (443 mg, 3.0 mmol, 1.2 equiv), **1e** (726 mg, 2.5 mmol, 1.0 equiv), NaH (151 mg, 3.8 mmol, 1.5 equiv, 60% dispersion in Paraffin Liquid). The crude **1f** was purified by flash chromatography on silica gel (Hexane/CH<sub>2</sub>Cl<sub>2</sub>/Et<sub>2</sub>O = 8:1:1). Orange oil.

**HRMS (ESI) *m/z***: [M + Na]<sup>+</sup> calculated for C<sub>14</sub>H<sub>13</sub>F<sub>2</sub>NNaO<sub>2</sub> 288.0812; found: 288.0815. **<sup>1</sup>H NMR** (500 MHz, CDCl<sub>3</sub>) δ 7.62 – 7.59 (m, 2H),

7.15 – 7.11 (m, 1H), 6.92 – 6.90 (m, 1H), 4.12 (dtt, *J* = 25.5, 7.9, 2.4 Hz, 1H), 3.74 (td, *J* = 7.2, 2.3 Hz, 2H), 2.07 – 2.03 (m, 2H), 1.73 (quin, *J* = 7.5 Hz, 2H), 1.48 (quin, *J* = 5.5 Hz, 2H). **<sup>13</sup>C NMR** (126 MHz, CDCl<sub>3</sub>) δ 183.6, 158.8, 156.5 (t, *J* = 286.7 Hz), 150.9, 138.5, 125.6, 123.8, 117.6, 110.2, 77.4, 40.0, 26.7, 26.6, 21.8 (d, *J* = 3.7 Hz). **<sup>19</sup>F NMR** (282 MHz, CDCl<sub>3</sub>) δ -88.7 (d-like, *J* = 47.6 Hz, 1F), -91.2 (dd, *J* = 47.6, 25.8 Hz, 1F). **IR (KBr)**: 3460, 3065, 2937, 2869, 1743, 1617, 1470, 1362, 1191, 811, 754, 474 cm<sup>-1</sup>.

### 7-(6,6-difluorohex-5-en-1-yl)-1,3-dimethyl-3,7-dihydro-1H-purine-2,6-dione (1n)

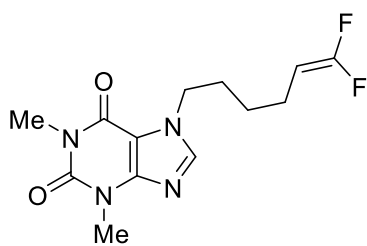

**1n** (334 mg, 1.1 mmol, 75% yield) was obtained by **General Procedure B** using Theophylline (269 mg, 1.5 mmol), **1e** (524 mg, 1.8 mmol, 1.2 equiv), NaH (66.0 mg, 1.7 mmol, 1.1 equiv, 60%, dispersion in Paraffin Liquid). The crude **1n** was purified by flash chromatography on silica gel (Hexane/Ethyl Acetate = 1:2). White Solid. **Mp.** = 50.7 – 51.4 °C (Chloroform). **HRMS** (EI) *m/z*: [M]<sup>+</sup> calculated for C<sub>13</sub>H<sub>16</sub>F<sub>2</sub>N<sub>4</sub>O<sub>2</sub> 298.1241; found: 298.1271. **<sup>1</sup>H NMR** (500 MHz, CDCl<sub>3</sub>) δ 7.55 (s, 1H), 4.30 (t, *J* = 7.2 Hz, 2H), 4.12 (dtd, *J* = 25.3, 7.9, 2.4 Hz, 1H), 3.60 (s, 3H), 3.42 (s, 3H), 2.03 (qt, *J* = 7.5, 1.5 Hz, 2H), 1.90 (quin, *J* = 8.0 Hz, 2H), 1.41 (quin, *J* = 7.5 Hz, 2H). **<sup>13</sup>C NMR** (126 MHz, CDCl<sub>3</sub>) δ 156.5 (t, *J* = 286.7 Hz), 155.2, 151.8, 149.0, 140.9, 107.0, 77.4, 47.0, 30.3, 29.9, 28.1, 26.3, 21.8 (d, *J* = 4.7 Hz). **<sup>19</sup>F NMR** (282 MHz, CDCl<sub>3</sub>) δ -89.1 (d, *J* = 46.6 Hz, 1F), -91.6 (dd, *J* = 47.1, 25.3 Hz, 1F). **IR (KBr)**: 3488, 3119, 2937, 2864, 2349, 1752, 1711, 1650, 1546 cm<sup>-1</sup>.

### (4-chlorophenyl)(3-(3,3-difluoroallyl)-5-methoxy-2-methyl-1H-indol-1-yl)methanone (1o)

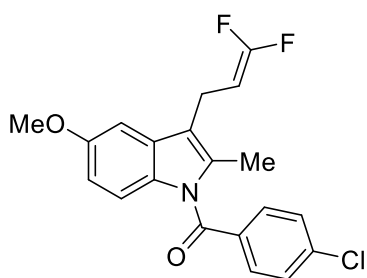

**1o** (780 mg, 2.1 mmol, 39% yield) was obtained by **General Procedure A** using aldehyde **S10** (1.799 g, 5.26 mmol), Triphenylphosphine (2.772 g, 10.5 mmol, 2.0 equiv.), Sodium Chlorodifluoroacetate (3.219 g, 21.0 mmol, 4.0 equiv.). The crude **1o** was purified by flash chromatography on silica gel (Hexane/Ethyl Acetate = 98:2). White Solid. **Mp.** = 60.2 – 60.7 °C (Chloroform). **HRMS** (ESI) *m/z*: [M + Na]<sup>+</sup> calculated for C<sub>20</sub>H<sub>16</sub>ClF<sub>2</sub>NNaO<sub>2</sub> 398.0735; found: 398.0733. **<sup>1</sup>H NMR** (500 MHz, CDCl<sub>3</sub>) δ 7.66 – 7.64 (m, 2H), 7.48 – 7.45 (m, 2H), 6.90 (d, *J* = 2.7 Hz, 1H), 6.86 (d, *J* = 9.2 Hz, 1H), 6.67 (dd, *J* = 9.0, 2.6 Hz, 1H), 4.32 (dtd, *J* = 24.8, 7.8, 2.1 Hz, 1H), 3.84 (s, 3H), 3.34 (dt, *J* = 7.8, 1.6 Hz, 2H), 2.35 (s, 3H). **<sup>13</sup>C NMR** (126 MHz, CDCl<sub>3</sub>) δ 168.4, 156.5 (t, *J* = 287.5 Hz), 156.0, 139.3, 134.5, 134.1, 131.2 (2C), 130.8, 130.6, 129.2 (2C), 117.1, 115.2, 111.4, 101.2, 77.4, 55.8, 17.4 (d, *J* = 4.5 Hz), 13.2. **<sup>19</sup>F NMR** (282 MHz, CDCl<sub>3</sub>) δ -89.4 (d-like, *J* = 46.6 Hz, 1F), -91.2 (dd, *J* = 46.6, 24.8 Hz, 1F). **IR (KBr)**: 3530, 3356, 2926, 2834, 2066, 1914, 1751, 1677, 1599, 1474 cm<sup>-1</sup>.

### 2-(1-(6,6-difluorohex-5-en-1-yl)-2,6-dioxopiperidin-3-yl)isoindoline-1,3-dione (1r)

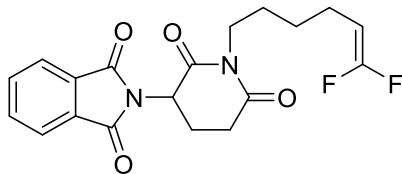

**1r** (289 mg, 0.77 mmol, 68% yield) was obtained by **General Procedure B** using Thalidomide (292 mg, 1.1 mmol), **1e** (394 mg, 1.4 mmol, 1.2 equiv), NaH (67.0 mg, 1.7 mmol, 1.5 equiv, 60%, dispersion in Paraffin Liquid). The crude **1r** was purified by flash chromatography on silica gel (Hexane/Et<sub>2</sub>O/CH<sub>2</sub>Cl<sub>2</sub> = 2/1/2). Pale yellow oil. **HRMS** (ESI) *m/z*: [M + H]<sup>+</sup> calculated for C<sub>19</sub>H<sub>19</sub>F<sub>2</sub>N<sub>2</sub>O<sub>4</sub> 377.1313; found: 377.1310. **<sup>1</sup>H NMR** (500 MHz, CDCl<sub>3</sub>) δ 7.90 – 7.87 (m, 2H), 7.78 – 7.76 (m, 2H), 5.01 – 4.97 (m, 1H), 4.12 (dtt, *J* = 25.5, 7.8, 2.5 Hz, 1H), 3.85 – 3.76 (m, 2H), 3.02 – 2.94 (m, 1H), 2.84 – 2.73 (m, 2H), 2.15 – 2.11 (m, 1H), 2.02 – 1.99 (m, 2H), 1.60 – 1.53 (m, 2H), 1.43 – 1.37 (m, 2H). **<sup>13</sup>C NMR** (126 MHz, CDCl<sub>3</sub>) δ 171.0, 168.6, 167.5 (2C), 156.4 (t, *J* = 286.7 Hz), 134.5 (2C), 131.8 (2C), 123.8 (2C), 77.7 (t, *J* = 21.9 Hz), 50.2, 40.4, 32.1, 27.2, 26.7, 22.1, 21.9 (d, *J* = 3.7 Hz). **<sup>19</sup>F NMR** (282 MHz, CDCl<sub>3</sub>) δ -89.7 (d-like, *J* = 48.6 Hz, 1F), -92.1 (dd, *J* = 48.1, 25.3 Hz, 1F). **IR (KBr)**: 3483 2945, 2866, 2340, 1723, 1683, 1391, 1152, 721, 530, 475 cm<sup>-1</sup>.



### 3-3. preparation of 6,6-difluorohex-5-en-1-yl 4-methylbenzenesulfonate (1e)

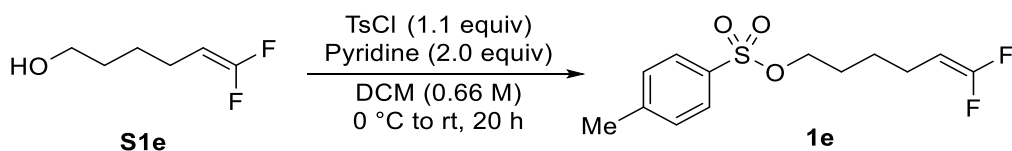

Under N<sub>2</sub> atmosphere, in a flame dried round bottom flask, 6,6-difluorohex-5-en-1-ol (S1e: 1.97 g, 14.5 mmol) and Pyridine (2.28 g, 28.9 mmol, 2.0 equiv) was dissolved in CH<sub>2</sub>Cl<sub>2</sub> (0.66 M). The solution was cooled to 0 °C. To the above mixture, *p*-Toluenesulfonyl Chloride (3.03 g, 15.9 mmol, 1.1 equiv.) was added, and the reaction mixture was stirred at rt for 12 h. After completion, the solution was quenched with water, and extracted with CH<sub>2</sub>Cl<sub>2</sub> 3 times. Combined organic layers were finally washed with brine solution, dried over anhydrous Na<sub>2</sub>SO<sub>4</sub> and then solvent was removed under reduced pressure. The crude product was purified by silica gel chromatography (Hexane/Et<sub>2</sub>O = 97:3 to 9/1) to obtain as colourless oil (3.19 g, 11.0 mmol, 76%).

**HRMS** (ESI) *m/z*: [M + Na]<sup>+</sup> calculated for C<sub>13</sub>H<sub>16</sub>F<sub>2</sub>NaO<sub>3</sub>S 313.0686; found: 313.0698. **<sup>1</sup>H NMR** (500 MHz, CDCl<sub>3</sub>) δ 7.79 (d, *J* = 8.2 Hz, 2H), 7.35 (d, *J* = 8.5 Hz, 2H), 4.05 (dtd, *J* = 27.5, 8.0, 2.5 Hz, 1H (-CHF<sub>2</sub>), and t, *J* = 6.5 Hz, 2H (-OCH<sub>2</sub>-) are overlapped), 2.45 (s, 3H), 1.94 (qt, *J* = 7.5, 1.5 Hz, 2H), 1.65 (quin, *J* = 6.5 Hz, 2H) 1.40 (quin, *J* = 7.5 Hz, 2H). **<sup>13</sup>C NMR** (126 MHz, CDCl<sub>3</sub>) δ 156.5 (t, *J* = 287.7 Hz), 144.9, 133.1, 130.0 (2C), 128.0 (2C), 77.4, 70.2, 28.1, 25.3, 21.7, 21.6 (d, *J* = 4.5 Hz). **<sup>19</sup>F NMR** (282 MHz, CDCl<sub>3</sub>) δ -89.3 (d-like, *J* = 46.6 Hz, 1F), -91.8 (dd, *J* = 47.6, 24.8 Hz, 1F). **IR (NaCl)**: 3713, 3628, 3409, 2947, 1747, 1359, 1176, 941, 664, 661, 488 cm<sup>-1</sup>.

## 4. Iode-perfluoroalkoxylation of *gem*-difluoroalkenes 1

### 4-1. General Procedure C for Iode-perfluoroalkoxylation

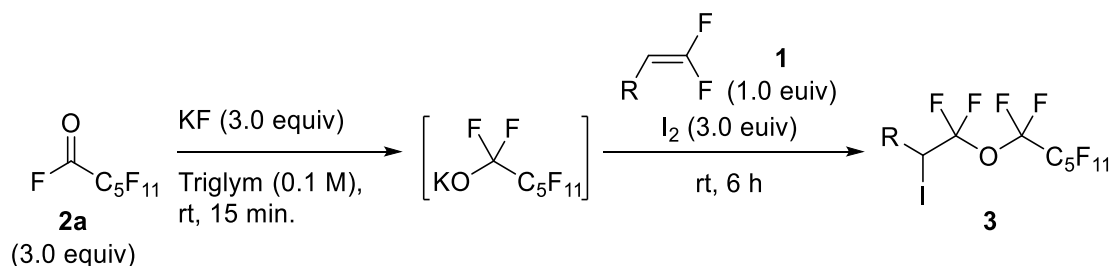

In an nitrogen gas-filled glovebox, KF (0.9 mmol, 3.0 eq), triglym (3.0 mL), and perfluoroacyl fluoride (0.9 mmol, 3.0 eq) was added to a 20 mL round-bottom flask equipped with a magnetic stir bar. After stirring for 15 min at room temperature, fluoroalkene (0.3 mmol, 1.0 eq) was added, followed by one-portion addition of I<sub>2</sub> (0.9 mmol, 3.0 eq) and the mixture was stirred at room temperature for 6 h. The reaction mixture was quenched with saturated NaHCO<sub>3</sub>aq and Na<sub>2</sub>SO<sub>3</sub>aq. The product was extracted with Et<sub>2</sub>O (10 mL x 3) and washed with Brine. The organic phase was dried over anhydrous Na<sub>2</sub>SO<sub>4</sub> and concentrated under reduced pressure. The product was purified by column chromatography on silica gel using hexane or hexane/Ethyl Acetate as eluent.

#### (4,4-difluoro-3-iodo-4-((perfluorohexyl)oxy)butyl)benzene (**3aa**)

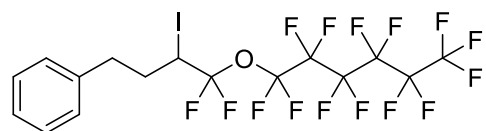

(a) **3aa** (177.9 mg, 0.282 mmol, 94% yield) was obtained by **general procedure C** using fluoroalkene **1a** (50.5 mg, 0.30 mmol), 2,2,3,3,4,4,5,5,6,6,6-undecafluorohexanoyl fluoride **2a** (0.18 mL, 0.90 mmol), KF (52.3 mg, 0.90 mmol) and I<sub>2</sub> (228 mg, 0.90 mmol). The crude **3aa** was purified by flash chromatography on silica gel (Hexane). (b) Gram scale reaction. **3aa** (3.47 g, 5.51 mmol, 92% yield) was obtained by **general procedure C** using fluoroalkene **1a** (1.01 g, 6.0 mmol), 2,2,3,3,4,4,5,5,6,6,6-undecafluorohexanoyl fluoride **2a** (5.7 g, 18 mmol), KF (1.05 g, 18 mmol) and I<sub>2</sub> (4.56 g, 18 mmol). The crude **3aa** was purified by flash chromatography on silica gel (Hexane). Colorless oil. **HRMS** (EI) *m/z*: [M]<sup>+</sup> calculated for C<sub>16</sub>H<sub>10</sub>F<sub>15</sub>IO 629.9537; found: 629.9545. **<sup>1</sup>H NMR** (500 MHz, CDCl<sub>3</sub>) δ 7.33 – 7.31 (m, 2H), 7.26 – 7.17 (m, 3H), 4.04 – 3.98 (m, 1H), 3.02 – 2.97 (m, 1H), 2.71 – 2.65 (m, 1H), 2.21 – 2.09 (m, 2H). **<sup>13</sup>C NMR** (126 MHz, CDCl<sub>3</sub>) δ 139.2, 128.9 (2C), 128.6 (2C), 126.9, 123.2 (t, *J* = 279.3 Hz), 120.7 – 105.9 (m), 34.4, 34.2, 25.6 (t, *J* = 28.2 Hz). **<sup>19</sup>F NMR** (282 MHz, CDCl<sub>3</sub>) δ: -71.0 to -71.2 (m, 2F), -81.2 (t-like, 3F), -84.2 (br, 2F), -122.7 (br, 2F), -123.4 (br, 2F), -126.1 (br, 2F), -126.6 to -126.7 (m, 2F). **IR (KBr)**: 3734, 3286, 3033, 2951, 2312, 1456, 1242, 1206, 700, 506 cm<sup>-1</sup>.

#### 4-(((5,5-difluoro-4-iodo-5-((perfluorohexyl)oxy)pentyl)oxy)methyl)-1,1'-biphenyl (**3ba**)

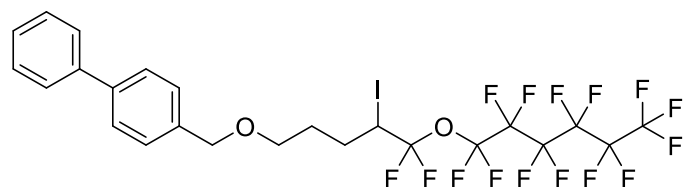

**3ba** (184.7 mg, 0.246 mmol, 82% yield) was obtained by **general procedure C** using fluoroalkene **1b** (86.5 mg, 0.30 mmol), 2,2,3,3,4,4,5,5,6,6,6-undecafluorohexanoyl fluoride **2a** (0.18 mL, 0.90 mmol), KF (51.8 mg, 0.89 mmol) and I<sub>2</sub> (225 mg, 0.89 mmol). The crude **3ba** was purified by flash chromatography on silica gel (Hexane/Ethyl Acetate = 19:1). Pale yellow oil. **HRMS** (ESI) *m/z*: [M + Na]<sup>+</sup> calculated for C<sub>24</sub>H<sub>18</sub>F<sub>15</sub>INaO<sub>2</sub> 773.0010; found: 772.9973. **<sup>1</sup>H NMR** (500 MHz, CDCl<sub>3</sub>) δ 7.63 – 7.60 (m, 4H), 7.48 – 7.45 (m, 2H), 7.44 – 7.41 (m, 2H), 7.39 – 7.36 (m, 1H), 4.58 (s, 2H), 4.30 – 4.24 (m, 1H), 3.62 – 3.54 (m, 2H), 2.14 – 2.07 (m, 1H), 2.00 – 1.90 (m, 2H), 1.79 – 1.70 (m, 1H). **<sup>13</sup>C NMR** (126 MHz, CDCl<sub>3</sub>) δ 141.0, 140.8, 137.3, 128.9 (2C), 128.2 (2C), 127.4, 127.3 (2C), 127.2 (2C), 123.2 (t, *J* = 279.3 Hz), 120.7 – 106.2 (m), 72.9, 68.8, 30.1, 29.3, 26.3 (t, *J* = 28.2 Hz). **<sup>19</sup>F NMR** (282 MHz, CDCl<sub>3</sub>) δ: -70.5 to -72.1 (m, 2F), -81.2 (m, 3F), -83.9 to -84.1 (m, 2F), -122.5 (br, 2F), -123.3 (br, 2F), -126.0 (br, 2F), -126.5 to -126.6 (m, 2F). **IR (KBr)**: 3448, 3032, 2947, 2863, 2346, 1490, 1245, 1207, 1105, 761, 419 cm<sup>-1</sup>.

#### 1-(((6,6-difluoro-5-iodo-6-((perfluorohexyl)oxy)hexyl)oxy)methyl)-4-methoxybenzene (**3ca**)

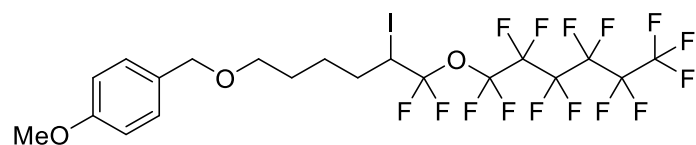

**3ca** (181.5 mg, 0.253 mmol, 84% yield) was obtained by **general procedure C** using fluoroalkene **1c** (76.9 mg, 0.30 mmol), 2,2,3,3,4,4,5,5,6,6,6-undecafluorohexanoyl fluoride **2a** (0.18 mL, 0.90 mmol), KF (52.5 mg, 0.90 mmol) and I<sub>2</sub> (222.2 mg, 0.88 mmol). The crude **3ca** was purified by flash chromatography on silica gel (Hexane/Ethyl Acetate = 99:1). Colorless oil. **HRMS** (ESI) *m/z*: [M + Na]<sup>+</sup> calculated for C<sub>20</sub>H<sub>18</sub>F<sub>15</sub>INaO<sub>3</sub> 740.9959; found: 740.9988. **<sup>1</sup>H NMR** (500 MHz, CDCl<sub>3</sub>) δ 7.28 – 7.25 (m, 2H), 6.90 – 6.87 (m, 2H), 4.44 – 4.43 (m, 2H), 4.19 – 4.12 (m, 1H), 3.81 (s, 3H), 3.48 – 3.43 (m, 2H), 1.89 – 1.58 (m, 5H), 1.51 – 1.43 (m, 1H). **<sup>13</sup>C NMR** (126 MHz, CDCl<sub>3</sub>) δ 159.3, 130.6, 129.4 (2C), 123.2 (t, *J* = 279.5 Hz), 120.7-115.3 (m), 113.9 (2C), 113.5 to 105.9 (m), 72.8, 69.5, 55.4, 32.5, 28.7, 26.3 (t, *J* = 27.3 Hz), 26.1. **<sup>19</sup>F NMR** (282 MHz, CDCl<sub>3</sub>) δ -70.7 to -72.2 (m, 2F), -81.2 (t, *J* = 9.9 Hz, 3F), -84.1 to -84.3 (m, 2F), -122.7 (br, 2F), -123.4 (br, 2F), -126.1 (br, 2F), -126.6 to -126.7 (m, 2F). **IR (KBr)**: 3507, 2951, 2864, 2359, 1749, 1613, 1513, 1249, 1101, 822, 711 cm<sup>-1</sup>.

### 6,6-difluoro-5-iodo-6-((perfluorohexyl)oxy)hexyl benzoate (3da)

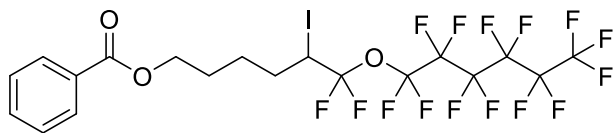

**3da** (180.8 mg, 0.257 mmol, 86% yield) was obtained by **general procedure C** using fluoroalkene **1d** (72.8 mg, 0.30 mmol), 2,2,3,3,4,4,5,5,6,6,6-undecafluorohexanoyl fluoride **2a** (0.18 mL,

0.90 mmol), KF (52.5 mg, 0.89 mmol) and I<sub>2</sub> (222 mg, 0.87 mmol). The crude **3da** was purified by flash chromatography on silica gel (Hexane/Et<sub>2</sub>O = 98:2). Pale yellow oil. **HRMS** (ESI) *m/z*: [M + Na]<sup>+</sup> calculated for C<sub>19</sub>H<sub>14</sub>F<sub>15</sub>INaO<sub>3</sub> 724.9646; found: 724.9621. **<sup>1</sup>H NMR** (500 MHz, CDCl<sub>3</sub>) δ: 8.05 – 8.04 (m, 2H), 7.58 – 7.55 (m, 1H), 7.46 – 7.43 (m, 2H), 4.39 – 4.32 (m, 2H), 4.22 – 4.16 (m, 1H), 1.95 – 1.78 (m, 5H), 1.59 – 1.53 (m, 1H). **<sup>13</sup>C NMR** (126 MHz, CDCl<sub>3</sub>) δ: 166.7, 133.1, 130.3, 129.7 (2C), 128.5 (2C), 123.1 (t, *J* = 279.5 Hz), 120.7-106.2 (m), 64.4, 32.5, 27.8, 25.9 (t, *J* = 30.9 Hz). **<sup>19</sup>F NMR** (282 MHz, CDCl<sub>3</sub>) δ -70.6 to -72.2 (m, 2F), -81.2 (t, *J* = 9.9 Hz, 3F), -84.1 to -84.2 (m, 2F), -122.7 (br, 2F), -123.4 (br, 2F), -126.1 (br, 2F), -126.6 to -126.7 (m, 2F). **IR (KBr)**: 2954, 2362, 1720, 1700, 1604, 1455, 1247, 1205, 714, 530, 420 cm<sup>-1</sup>.

### 6,6-difluoro-5-iodo-6-((perfluorohexyl)oxy)hexyl 4-methylbenzenesulfonate (3ea)

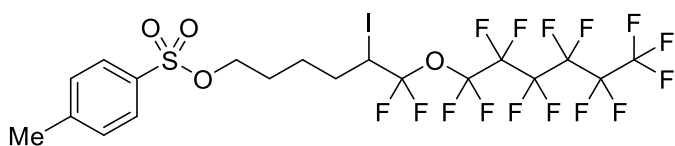

**3ea** (215.6 mg, 0.287 mmol, 96% yield) was obtained by **general procedure C** using fluoroalkene **1e** (87.1 mg, 0.30 mmol), 2,2,3,3,4,4,5,5,6,6,6-undecafluorohexanoyl fluoride **2a** (0.18 mL, 0.90 mmol), KF (52.3 mg, 0.90 mmol) and I<sub>2</sub> (222.3 mg, 0.87

mmol). The crude **3ea** was purified by flash chromatography on silica gel (Hexane/Ethyl Acetate = 19:1). Colorless oil. **HRMS** (ESI) *m/z*: [M + Na]<sup>+</sup> calculated for C<sub>19</sub>H<sub>16</sub>F<sub>15</sub>INaO<sub>4</sub>S 774.9472; found: 774.9478. **<sup>1</sup>H NMR** (500 MHz, CDCl<sub>3</sub>) δ 7.81 – 7.79 (m, 2H), 7.36 (d-like, *J* = 8.2 Hz, 2H), 4.06 (m, 1H ( - CHI - ), and t, *J* = 6.0 Hz, 2H ( - OCH<sub>2</sub> - ) are overlapped), 2.46 (s, 3H), 1.84 – 1.62 (m, 5H), 1.44 – 1.35 (m, 1H). **<sup>13</sup>C NMR** (126 MHz, CDCl<sub>3</sub>) δ 145.1, 133.1, 130.0 (2C), 128.0 (2C), 123.0 (t, *J* = 279.3 Hz), 118.5-105.4 (m), 69.8, 32.1, 28.0, 25.5 (t, *J* = 27.3 Hz), 25.3, 21.8. **<sup>19</sup>F NMR** (282 MHz, CDCl<sub>3</sub>) δ -70.5 to -72.2 (m, 2F), -81.1 (t-like, 3F), -83.9 to -84.1 (m, 2F), -122.5 (br, 2F), -123.2 (br, 2F), -125.9 (br, 2F), -126.4 to -126.5 (m, 2F). **IR (KBr)**: 3638, 2957, 2871, 2355, 1749, 1600, 1245, 1208, 938, 665, 554 cm<sup>-1</sup>.

### 1-(6,6-difluoro-5-iodo-6-((perfluorohexyl)oxy)hexyl)indoline-2,3-dione (3fa)

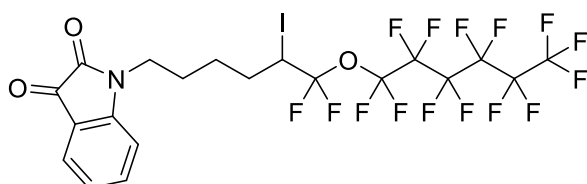

**3fa** (194.9 mg, 0.268 mmol, 89% yield) was obtained by **general procedure C** using fluoroalkene **1f** (78.5 mg, 0.30 mmol), 2,2,3,3,4,4,5,5,6,6,6-undecafluorohexanoyl fluoride **2a** (0.18 mL, 0.90 mmol), KF (52.1 mg, 0.89 mmol) and I<sub>2</sub> (226 mg, 0.90 mmol). The crude

**3fa** was purified by flash chromatography on silica gel (Hexane/Et<sub>2</sub>O = 99:1). Orange oil. **HRMS** (ESI) *m/z*: [M + Na]<sup>+</sup> calculated for C<sub>20</sub>H<sub>13</sub>F<sub>15</sub>INNaO<sub>3</sub> 749.9598; found: 749.9625. **<sup>1</sup>H NMR** (500 MHz, CDCl<sub>3</sub>) δ 7.63 – 7.59 (m, 2H), 7.14 (t-like, *J* = 7.5 Hz, 1H), 6.90 (d, *J* = 7.9 Hz, 1H), 4.17 – 4.11 (m, 1H), 3.81 – 3.72 (m, 2H), 1.96 – 1.70 (m, 5H), 1.51 – 1.43 (m, 1H). **<sup>13</sup>C NMR** (126 MHz, CDCl<sub>3</sub>) δ 183.4, 158.3, 150.8, 138.5, 125.8, 124.0, 123.9, 123.0 (t, *J* = 279.5 Hz), 120.7-117.8 (m), 117.7, 116.3-110.2 (m), 110.1, 109.1-106.4 (m), 39.9, 32.2, 26.6, 26.4, 25.6 (t, *J* = 28.2 Hz). **<sup>19</sup>F NMR** (282 MHz, CDCl<sub>3</sub>) δ: -70.7 to -72.4 (m, 2F), -81.2 (t, *J* = 9.9 Hz, 3F), -84.1 to -84.3 (m, 2F), -122.7 (br, 2F), -123.4 (br, 2F), -126.1 (br, 2F), -126.6 to -126.7 (m, 2F). **IR (KBr)**: 3646, 3284, 2937, 2352, 2318, 1742, 1606, 1459, 1208, 752, 472 cm<sup>-1</sup>.

### 1,2,3,4,5-pentafluoro-6-(1,1,2,3,3-pentafluoro-2-iodo-3-((perfluorohexyl)oxy)propyl)benzene (3ga)

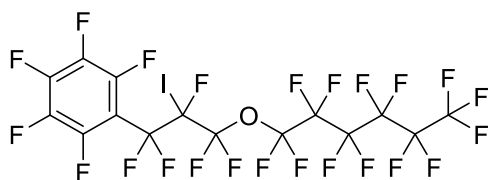

**3ga** (184.1mg, 0.242 mmol, 81% yield) was obtained by **general procedure C** using fluoroalkene **1g** (89.2 mg, 0.30 mmol), 2,2,3,3,4,4,5,5,6,6,6-undecafluorohexanoyl fluoride **2a** (0.18 mL, 0.90 mmol), KF (52.0 mg, 0.90 mmol) and I<sub>2</sub> (222 mg, 0.87 mmol). The crude **3ga** was purified by flash chromatography on silica gel (Hexane).

Colorless oil. **HRMS** (FAB) *m/z*: [M]<sup>+</sup> calculated for C<sub>15</sub>F<sub>23</sub>IO 759.8627; found: 759.8615. **<sup>13</sup>C NMR** (126 MHz, CDCl<sub>3</sub>) δ 146.7 – 137.0 (m), 121.6 – 104.9 (m), 83.9 – 80.7 (m). **<sup>19</sup>F NMR** (282 MHz, CDCl<sub>3</sub>) δ -79.4 to -80.8 (m, 2F), -86.0 (t, *J* = 9.9 Hz, 3F), -87.8 to -89.1 (m, 2F), -91.6 to -92.8 (m, 1F), -101.2 to -102.6 (m, 1F), -127.4 (br, 2F), -128.0 (br, 2F), -130.6 (br, 2F), -131.3 to -131.4 (m, 2F), -140.2 to -140.5 (m, 2F), -148.3 to -148.6 (m, 1F), -151.4 to -151.6 (m, 1F), -164.5 to -164.8 (m, 2F). **IR (KBr)**: 2338, 1654, 1531, 1511, 1245, 1210, 999, 714, 655, 420 cm<sup>-1</sup>.

### 7-(6,6-difluoro-5-iodo-6-((perfluorohexyl)oxy)hexyl)-1,3-dimethyl-3,7-dihydro-1H-purine-2,6-dione (3na)

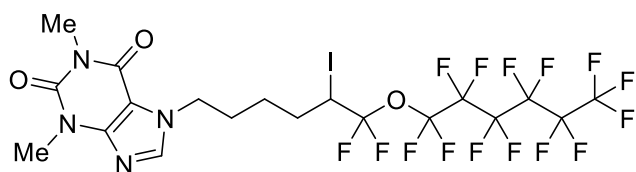

**3na** (171.4 mg, 0.225 mmol, 75% yield) was obtained by **general procedure C** using fluoroalkene **1n** (89.6 mg, 0.30 mmol), 2,2,3,3,4,4,5,5,6,6,6-undecafluorohexanoyl fluoride **2a** (0.18 mL, 0.90 mmol), KF (52.5 mg, 0.90 mmol) and I<sub>2</sub> (229 mg, 0.90 mmol).

The crude **3na** was purified by flash chromatography on silica gel (Hexane/Ethyl Acetate = 1:2). White solid. **Mp.** = 68.0 – 68.6 °C (Chloroform). **HRMS** (FAB) *m/z*: [M + H]<sup>+</sup> calculated for C<sub>19</sub>H<sub>17</sub>F<sub>15</sub>IN<sub>4</sub>O<sub>3</sub> 761.0106; found: 761.0103. **<sup>1</sup>H NMR** (500 MHz, CDCl<sub>3</sub>) δ 7.57 (s, 1H), 4.37 – 4.27 (m, 2H), 4.20 – 4.14 (m, 1H), 3.60 (s, 3H), 3.42 (s, 3H), 2.03 – 1.82 (m, 4H), 1.72 – 1.63 (m, 1H), 1.46 – 1.37 (m, 1H). **<sup>13</sup>C NMR** (126 MHz, CDCl<sub>3</sub>) δ 155.2, 151.8, 149.1, 140.9, 123.0 (t, *J* = 279.5 Hz), 120.6 – 107.7 (m), 107.0, 106.9 – 105.8 (m), 46.9, 32.0, 29.9, 28.1, 26.0, 25.6 (t, *J* = 28.2 Hz). **<sup>19</sup>F NMR** (282 MHz, CDCl<sub>3</sub>) δ: -70.6 to -72.5 (m, 2F), -81.2 (t, *J* = 9.9 Hz, 3F), -84.1 to -84.2 (m, 2F), -122.7 (br, 2F), -123.4 (br, 2F), -126.1 (br, 2F), -126.6 to -126.7 (m, 2F). **IR (KBr)**: 3459, 3115, 2952, 2871, 1705, 1671, 1242, 1205, 746, 713, 507 cm<sup>-1</sup>.

### (4-chlorophenyl)(3-(3,3-difluoro-2-iodo-3-((perfluorohexyl)oxy)propyl)-5-methoxy-2-methyl-1H-indol-1-yl)methanone (3oa)

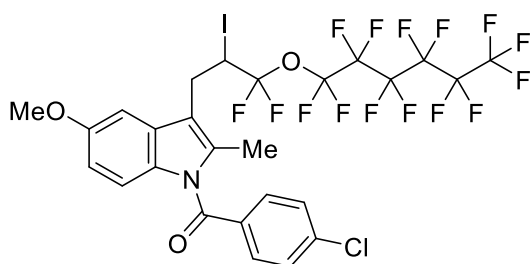

**3oa** (214.5 mg, 0.256 mmol, 85% yield) was obtained by **general procedure C** using fluoroalkene **1o** (112.7 mg, 0.30 mmol), 2,2,3,3,4,4,5,5,6,6,6-undecafluorohexanoyl fluoride **2a** (0.18 mL, 0.90 mmol), KF (52.4 mg, 0.90 mmol) and I<sub>2</sub> (222.3 mg, 0.88 mmol). The crude **3oa** was purified by flash chromatography on silica gel (Hexane/Ethyl Acetate = 8:2). Pale yellow solid. **Mp.** = 84.2 – 84.9 °C (Chloroform). **HRMS** (ESI) *m/z*: [M + Na]<sup>+</sup> calculated for C<sub>26</sub>H<sub>16</sub>ClF<sub>15</sub>INaO<sub>3</sub> 859.9522; found: 859.9517. **<sup>1</sup>H NMR** (500 MHz, CDCl<sub>3</sub>) δ 7.68 – 7.65 (m, 2H), 7.50 – 7.47 (m, 2H), 6.94 (d-like, *J* = 9.2 Hz, 1H), 6.82 (d, *J* = 2.4 Hz, 1H), 6.71 (dd, *J* = 9.2, 2.4 Hz, 1H), 4.60 – 4.54 (m, 1H), 3.83 (s, 3H), 3.51 (dd, *J* = 15.4, 3.2 Hz, 1H), 3.23 (dd, *J* = 15.3, 11.3 Hz, 1H), 2.39 (s, 3H). **<sup>13</sup>C NMR** (126 MHz, CDCl<sub>3</sub>) δ 168.5, 156.1, 139.6, 136.3, 133.8, 131.3 (2C), 131.1, 129.8, 129.3 (2C), 123.1 (t, *J* = 281.2 Hz), 118.4 – 115.6 (m), 115.4, 114.8, 114.4-112.2 (m), 111.6, 111.1 to 101.3 (m), 100.8, 55.7, 28.8, 25.7 (t, *J* = 27.3 Hz), 14.0. **<sup>19</sup>F NMR** (282 MHz, CDCl<sub>3</sub>) δ -70.8 to -72.3 (m, 2F), -81.2 (t-like, 3F), -84.0 to -84.1 (m, 2F), -122.6 (br, 2F), -123.3 (br, 2F), -126.1 (br, 2F), -126.6 to -126.7 (m, 2F). **IR (KBr)**: 2960, 2337, 1684, 1477, 1250, 1211, 1039, 926, 835, 711, 419 cm<sup>-1</sup>.

#### 4-((6,6-difluoro-5-iodo-6-((perfluorohexyl)oxy)hexyl)thio)quinazoline (3pa)

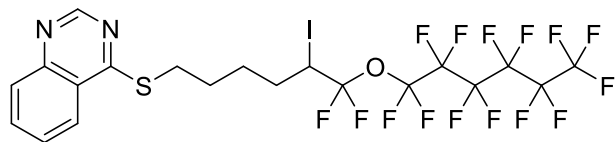

**3pa** (193.0 mg, 0.260 mmol, 85% yield) was obtained by **general procedure C** using fluoroalkene **1p** (84.1 mg, 0.30 mmol), 2,2,3,3,4,4,5,5,6,6,6-undecafluorohexanoyl fluoride **2a** (0.18 mL, 0.90 mmol), KF (52.7 mg, 0.90 mmol) and I<sub>2</sub> (228 mg, 0.90 mmol). The

crude **3ra** was purified by flash chromatography on silica gel (Hexane/Et<sub>2</sub>O = 98:2). White solid. **Mp.** = 32.9 – 33.6 °C (Chloroform). **HRMS** (ESI) *m/z*: [M + H]<sup>+</sup> calculated for C<sub>20</sub>H<sub>15</sub>F<sub>15</sub>NNaO<sub>3</sub> 684.0206; found: 684.0218. **<sup>1</sup>H NMR** (500 MHz, CDCl<sub>3</sub>) δ 8.98 (s, 1H), 8.09 (d, *J* = 8.5 Hz, 1H), 7.96 (d-like, *J* = 8.2 Hz, 1H), 7.87 – 7.84 (m, 1H), 7.61 – 7.57 (m, 1H), 4.27 – 4.21 (m, 1H), 3.49 – 3.34 (m, 2H), 1.97 – 1.56 (m, 7H). **<sup>13</sup>C NMR** (126 MHz, CDCl<sub>3</sub>) δ 171.3, 153.6, 148.1, 133.8, 128.9, 127.5, 124.1, 124.0, 123.1 (t, *J* = 279.5 Hz), 120.6 – 106.2 (m), 32.1, 28.9, 28.3, 28.1, 25.9 (t, *J* = 28.2 Hz). **<sup>19</sup>F NMR** (282 MHz, CDCl<sub>3</sub>) δ -70.6 to -72.2 (m, 2F), -81.3 (t, *J* = 9.9 Hz, 3F), -84.1 to -84.2 (m, 2F), -122.7 (br, 2F), -123.4 (br, 2F), -126.1 (br, 2F), -126.6 to -126.7 (m, 2F). **IR (KBr)**: 3470, 2944, 2860, 2334, 1747, 1485, 1243, 1207, 841, 711, 461 cm<sup>-1</sup>.

#### (3R,5R,8R,9S,10S,13R,14S,17R)-17-((2R)-6,6-difluoro-5-iodo-6-((perfluorohexyl)oxy)hexan-2-yl)-3-methoxy-10,13-dimethylhexadecahydro-1H-cyclopenta[*a*]phenanthrene (3qa)

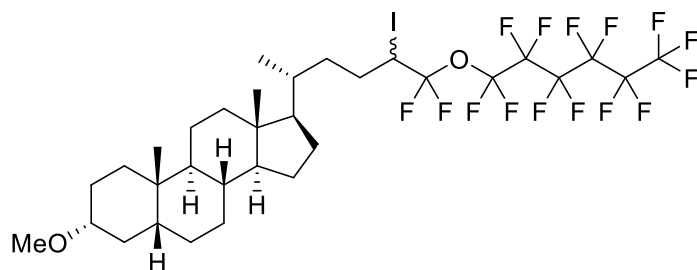

**3qa** (245.4 mg, 0.282 mmol, 94% yield, 1:1.2 *dr*) was obtained by **general procedure C** using fluoroalkene **1q** (122.8 mg, 0.30 mmol), 2,2,3,3,4,4,5,5,6,6,6-undecafluorohexanoyl fluoride **2a** (0.18 mL, 0.90 mmol), KF (52.6 mg, 0.91 mmol) and I<sub>2</sub> (230 mg, 0.91 mmol). The crude **3qa** was purified by flash chromatography on silica gel (Hexane/Ethyl Acetate = 95:5).

Yellow oil. **HRMS** (ESI) *m/z*: [M + H]<sup>+</sup> calculated for C<sub>32</sub>H<sub>43</sub>F<sub>15</sub>IO<sub>2</sub> 871.2068; found: 871.2042. **<sup>1</sup>H NMR** (500 MHz, CDCl<sub>3</sub>) δ 4.14 – 4.08 (m, 1H), 3.35 (s, 3H), 3.19 – 3.13 (m, 1H), 2.00 – 0.96 (m, 29H), 0.91 (t, *J* = 9.5 Hz, 6H), 0.65 (d-like, *J* = 2.4 Hz, 3H). **<sup>13</sup>C NMR** (126 MHz, CDCl<sub>3</sub>) δ 129.2, 128.4, 123.2 (t, *J* = 279.5 Hz), 123.2 (t, *J* = 279.5 Hz, rotamer), 120.7 – 104.6 (m), 80.5, 56.6, 56.6, 56.1, 56.0, 55.7, 42.9, 42.2, 40.4, 40.3, 40.2, 36.0, 35.7, 35.5, 35.4, 35.0, 34.9, 34.7, 32.9, 30.1, 29.9, 29.2, 28.5, 28.3, 27.6, 27.5, 27.3, 27.3, 27.1, 27.1, 26.9, 26.9, 26.5, 24.3, 23.6, 20.9, 19.0, 18.2, 12.2. **<sup>19</sup>F NMR** (282 MHz, CDCl<sub>3</sub>) δ: -70.9- to -71.0 (m, 2F-rotamer), -71.3 to -71.4 (m, 2F), -81.2 (t-like, 3F), -84.1 to -84.2 (m, 2F), -122.7 (br, 2F), -123.4 (br, 2F), -126.1 (br, 2F), -126.6 to -126.7 (m, 2F). **IR (KBr)**: 3286, 2935, 2866, 2527, 1452, 1242, 1211, 1045, 712, 420 cm<sup>-1</sup>.

#### 2-(1-(6,6-difluoro-5-iodo-6-((perfluorohexyl)oxy)hexyl)-2,6-dioxopiperidin-3-yl)isoindoline-1,3-dione (3ra)

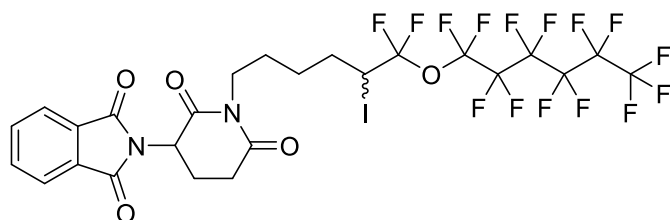

**3ra** (228 mg, 0.272 mmol, 91% yield) was obtained by **general procedure C** using fluoroalkene **1r** (112 mg, 0.30 mmol), 2,2,3,3,4,4,5,5,6,6,6-undecafluorohexanoyl fluoride **2a** (0.18 mL, 0.89 mmol), KF (51.6 mg, 0.89 mmol) and I<sub>2</sub> (226 mg, 0.89 mmol).

The crude **3ra** was purified by flash chromatography on silica gel (Hexane/Ethyl Acetate = 2:1). Pale yellow oil. **HRMS** (ESI) *m/z*: [M + Na]<sup>+</sup> calculated for C<sub>25</sub>H<sub>18</sub>F<sub>15</sub>IN<sub>2</sub>NaO<sub>5</sub> 860.1919; found: 860.9896. **<sup>1</sup>H NMR** (500 MHz, CDCl<sub>3</sub>) δ 7.90 – 7.88 (m, 2H), 7.79 – 7.76 (m, 2H), 5.03 – 4.95 (m, 1H), 4.21 – 4.13 (m, 1H), 3.88 – 3.78 (m, 2H), 3.03 – 2.93 (m, 1H), 2.64 – 2.88 (2H), 2.17 – 2.09 (m, 1H), 1.93 – 1.77 (m, 2H), 1.69 – 1.54 (m, 2H), 1.44 – 1.35 (m, 1H). **<sup>13</sup>C NMR** (126 MHz, CDCl<sub>3</sub>) δ 171.0, 168.6, 167.5 (2C), 134.6 (2C), 131.9 (2C), 123.9 (2C), 123.1 (t, *J* = 280.4 Hz), 120.7 – 106.1 (m), 72.0, 70.8, 68.3, 67.5, 59.2, 50.2, 40.2, 40.1, 32.2, 32.1, 26.7, 26.6, 26.5, 26.3, 26.2, 26.2, 26.0, 26.0, 25.8, 22.2, 22.2. **<sup>19</sup>F NMR** (282 MHz, CDCl<sub>3</sub>) δ: -70.6 to -72.5 (m, 2F), -81.2 (t-like, 3F), -84.1 (t-like, 2F), -122.7 (br, 2F), -123.4 (br, 2F), -126.1 (br, 2F), -126.6 to -126.7 (m, 2F). **IR (KBr)**: 3850, 3646, 3286, 3032, 2926, 2358, 1715, 1680, 1390, 722, 506, 411 cm<sup>-1</sup>.

## 5. Bromo-perfluoroalkoxylation of *gem*-difluoroalkenes 1

### 5-1. General Procedure D for Bromo-perfluoroalkoxylation

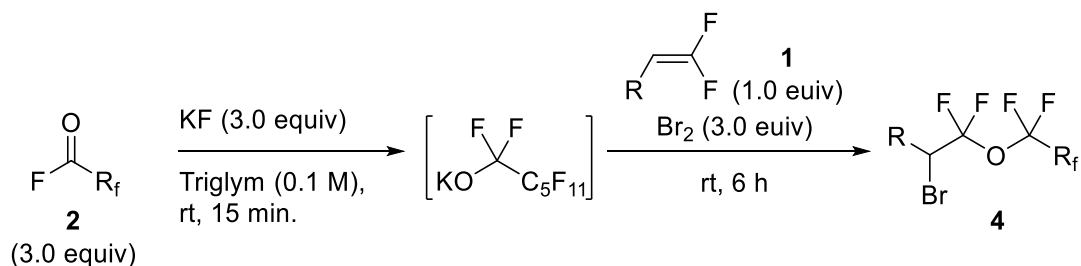

In an nitrogen gas-filled glovebox, KF (0.9 mmol, 3.0 eq), triglym (2.7 mL), and perfluoroacyl fluoride (0.9 mmol, 3.0 eq) was added to a 20 mL round-bottom flask equipped with a magnetic stir bar. After stirring for 15 min at room temperature, fluoroalkene (0.3 mmol, 1.0 eq) was added, followed by one-portion addition of Br<sub>2</sub> (0.9 mmol, 3.0 eq) in 0.3 mL triglym and the mixture was stirred at room temperature for 6 h. The reaction mixture was quenched with saturated NaHCO<sub>3</sub> aq and Na<sub>2</sub>SO<sub>3</sub> aq. The product was extracted with Et<sub>2</sub>O (10 mL x 3) and washed with Brine. The organic phase was dried over anhydrous Na<sub>2</sub>SO<sub>4</sub> and concentrated under reduced pressure. The product was purified by column chromatography on silica gel using hexane or hexane/Ethyl Acetate as eluent.

### 5-2. General Procedure E for Bromo-perfluoroalkoxylation

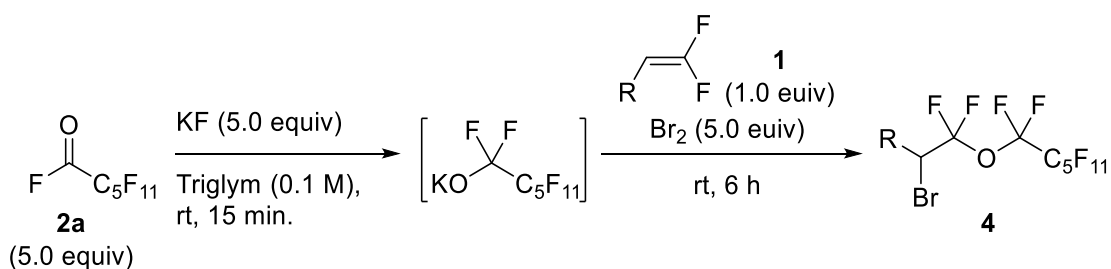

In an nitrogen gas-filled glovebox, KF (1.5 mmol, 5.0 eq), triglym (5.5 mL), and perfluoroacyl fluoride (1.5 mmol, 5.0 eq) was added to a 20 mL round-bottom flask equipped with a magnetic stir bar. After stirring for 15 min at room temperature, fluoroalkene (0.3 mmol, 1.0 eq) was added, followed by one-portion addition of Br<sub>2</sub> (1.5 mmol, 5.0 eq) in 0.5 mL triglym and the mixture was stirred at room temperature for 6 h. The reaction mixture was quenched with saturated NaHCO<sub>3</sub> aq and Na<sub>2</sub>SO<sub>3</sub> aq. The product was extracted with Et<sub>2</sub>O (10 mL x 3) and washed with Brine. The organic phase was dried over anhydrous Na<sub>2</sub>SO<sub>4</sub> and concentrated under reduced pressure. The product was purified by column chromatography on silica gel using hexane or hexane/Ethyl Acetate as eluent.

#### (3-bromo-4,4-difluoro-4-((perfluorohexyl)oxy)butyl)benzene (**4aa**)

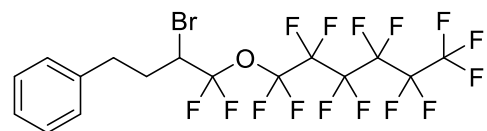

**4aa** (154.5 mg, 0.265 mmol, 88% yield) was obtained by **general procedure D** using fluoroalkene **1a** (50.5 mg, 0.30 mmol), 2,2,3,3,4,4,5,5,6,6,6-undecafluorohexanoyl fluoride **2a** (0.18 mL, 0.90 mmol), KF (53.0 mg, 0.91 mmol) and Br<sub>2</sub> (0.90 mmol). The crude **4aa** was purified by flash chromatography on silica gel (Hexane). Colorless oil. **HRMS** (EI) *m/z*: [M]<sup>+</sup> calculated for C<sub>16</sub>H<sub>10</sub>BrF<sub>15</sub>O 581.9676; found: 581.9677. **<sup>1</sup>H NMR** (500 MHz, CDCl<sub>3</sub>) δ 7.34 – 7.31 (m, 2H), 7.26 – 7.23 (m, 1H), 7.21 – 7.20 (m, 2H), 3.98 – 3.92 (m, 1H), 3.04 – 2.98 (m, 1H), 2.78 – 2.72 (m, 1H), 2.37 – 2.30 (m, 1H), 2.19 – 2.11 (m, 1H). **<sup>13</sup>C NMR** (126 MHz, CDCl<sub>3</sub>) δ 139.2, 128.9 (2C), 128.6 (2C), 126.9, 125.0 (t, *J* = 280.2 Hz), 120.7 – 107.9 (m), 48.4 (t, *J* = 30.0 Hz), 32.9, 32.6. **<sup>19</sup>F NMR** (282 MHz, CDCl<sub>3</sub>) δ: -74.7 to -74.8 (m, 2F), -81.2 to -81.3 (m, 3F), -84.1 (br, 2F), -122.8 (br, 2F), -123.4 (br, 2F), -126.2 (br, 2F), -126.6 to -126.7 (m, 2F). **IR (KBr)**: 3800, 3285, 3037, 2959, 2339, 1605, 1499, 1241, 1208, 746, 646 cm<sup>-1</sup>.

### 1-(((5-bromo-6,6-difluoro-6-((perfluorohexyl)oxy)hexyl)oxy)methyl)-4-methoxybenzene (4ca)

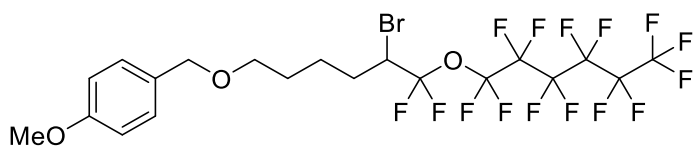

**4ca** (186.5 mg, 0.278 mmol, 93% yield) was obtained by **general procedure D** using fluoroalkene **1c** (76.9 mg, 0.30 mmol), 2,2,3,3,4,4,5,5,6,6,6-undecafluorohexanoyl fluoride **2a** (0.18 mL, 0.90 mmol), KF (52.3 mg, 0.90 mmol) and Br<sub>2</sub> (0.90

mmol). The crude **4ca** was purified by flash chromatography on silica gel (Hexane). Colorless oil. **HRMS** (FAB) *m/z*: [M]<sup>+</sup> calculated for C<sub>20</sub>H<sub>18</sub>BrF<sub>15</sub>O<sub>3</sub> 670.0200; found: 670.0197. **<sup>1</sup>H NMR** (500 MHz, CDCl<sub>3</sub>) δ 7.29 – 7.28 (m, 2H), 6.92 – 6.90 (m, 2H), 4.46 (s, 2H), 4.12 – 4.07 (m, 1H), 3.83 (s, 3H), 3.49 (t, *J* = 6.3 Hz, 2H), 2.09 – 2.03 (m, 1H), 1.90 – 1.49 (m, 6H). **<sup>13</sup>C NMR** (126 MHz, CDCl<sub>3</sub>) δ 159.3, 130.5, 129.4 (2C), 122.7 (t, *J* = 280.4 Hz), 118.6 – 115.3 (m), 113.9 (2C), 113.3 – 106.2 (m), 72.8, 69.4, 55.4, 49.3 (t, *J* = 30.0 Hz), 31.1, 28.9, 24.0. **<sup>19</sup>F NMR** (282 MHz, CDCl<sub>3</sub>) δ -74.2 to -75.5 (m, 2F), -81.2 (t-like, 3F), -83.9 to -84.0 (m, 2F), -122.7 (br, 2F), -123.3 (br, 2F), -126.0 (br, 2F), -126.5 to -126.6 (m, 2F). **IR (KBr)**: 3431, 2939, 2863, 2337, 1744, 1500, 1244, 1208, 810, 710, 417 cm<sup>-1</sup>.

### 5-bromo-6,6-difluoro-6-((perfluorohexyl)oxy)hexyl 4-methylbenzenesulfonate (4ea)

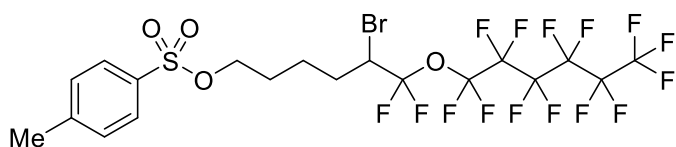

**4ea** (190.9 mg, 0.271 mmol, 90% yield) was obtained by **general procedure D** using fluoroalkene **1e** (87.1 mg, 0.30 mmol), 2,2,3,3,4,4,5,5,6,6,6-undecafluorohexanoyl fluoride **2a** (0.18 mL, 0.90 mmol), KF (52.3 mg, 0.90 mmol) and Br<sub>2</sub> (0.9 mmol). The

crude **4ea** was purified by flash chromatography on silica gel (Hexane/Ethyl Acetate = 19:1). Colorless oil. **HRMS** (ESI) *m/z*: [M + Na]<sup>+</sup> calculated for C<sub>19</sub>H<sub>16</sub>BrF<sub>15</sub>NaO<sub>4</sub>S 726.9611; found: 726.9612. **<sup>1</sup>H NMR** (500 MHz, CDCl<sub>3</sub>) δ 7.80 (d-like, *J* = 8.2 Hz, 2H), 7.36 (d-like, *J* = 8.2 Hz, 2H), 4.05 (t, *J* = 5.5 Hz, 2H (-OCH<sub>2</sub>-) and m, 1H (-CHBr-) are overlapped), 2.45 (s, 3H), 2.01 – 1.95 (m, 1H), 1.81 – 1.64 (m, 4H), 1.51 – 1.41 (m, 1H). **<sup>13</sup>C NMR** (126 MHz, CDCl<sub>3</sub>) δ 145.1, 133.0, 130.0 (2C), 128.0 (2C), 122.5 (t, *J* = 280.4 Hz), 118.6 – 105.5 (m), 69.8, 48.8 (t, *J* = 30.0 Hz), 30.7, 27.9, 23.2, 21.7. **<sup>19</sup>F NMR** (282 MHz, CDCl<sub>3</sub>) δ -74.3 to -75.7 (m, 2F), -81.2 (t, *J* = 9.9 Hz, 3F), -84.0 to -84.2 (m, 2F), -122.8 (br, 2F), -123.4 (br, 2F), -126.1 (br, 2F), -126.6 to -126.7 (m, 2F). **IR (KBr)**: 3541, 3286, 2962, 2351, 1732, 1599, 1362, 1245, 1208, 813, 436 cm<sup>-1</sup>.

### (1-bromo-2,2-difluoro-2-((perfluorohexyl)oxy)ethyl)benzene (4ha)

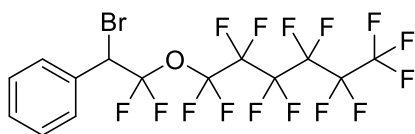

**4ha** (66.7 mg, 0.120 mmol, 40% yield) was obtained by **general procedure D** using fluoroalkene **1h** (42.0 mg, 0.30 mmol), 2,2,3,3,4,4,5,5,6,6,6-undecafluorohexanoyl fluoride **2a** (0.18 mL, 0.90 mmol), KF (52.4 mg, 0.90 mmol) and Br<sub>2</sub> (0.90 mmol). The

crude **4ha** was purified by flash chromatography on silica gel (Hexane). Colorless oil. **HRMS** (FAB) *m/z*: [M]<sup>+</sup> calculated for C<sub>14</sub>H<sub>6</sub>BrF<sub>15</sub>O 553.9363; found: 553.9374. **<sup>1</sup>H NMR** (500 MHz, CDCl<sub>3</sub>) δ 7.48 – 7.47 (m, 2H), 7.42 – 7.35 (m, 3H), 5.12 (t, *J* = 8.4 Hz, 1H). **<sup>13</sup>C NMR** (126 MHz, CDCl<sub>3</sub>) δ 132.6, 130.2, 129.4 (2C), 128.9 (2C), 122.1 (t, *J* = 281.2 Hz), 118.6 – 106.2 (m), 48.9 (t, *J* = 30.0 Hz). **<sup>19</sup>F NMR** (282 MHz, CDCl<sub>3</sub>) δ -73.0 to -74.4 (m, 2F), -81.3 to -81.2 (t, *J* = 9.0 Hz, 3F), -83.4 to -84.7 (m, 2F), -122.8 (br, 2F), -123.5 (br, 2F), -126.0 to -126.1 (m, 2F), -126.6 to -126.7 (m, 2F). **IR (KBr)**: 3733, 3565, 2928, 2351, 1460, 1244, 1208, 849, 697, 649 cm<sup>-1</sup>.

### 1-(1-bromo-2,2-difluoro-2-((perfluorohexyl)oxy)ethyl)-4-methylbenzene (4ia)

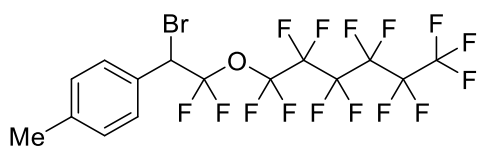

**4ia** (91.3 mg, 0.160 mmol, 53% yield) was obtained by **general procedure D** using fluoroalkene **1i** (46.4 mg, 0.30 mmol), 2,2,3,3,4,4,5,5,6,6,6-undecafluorohexanoyl fluoride **2a** (0.18 mL, 0.90 mmol), KF (52.4 mg, 0.90 mmol) and Br<sub>2</sub> (0.90 mmol). The crude **4ia** was purified by flash chromatography on silica gel (Hexane).

Colorless oil. **HRMS** (FAB)  $m/z$ :  $[M]^+$  calculated for  $C_{15}H_8BrF_{15}O$  567.9519; found: 567.9508.  $^1H$  NMR (500 MHz,  $CDCl_3$ )  $\delta$  7.36 (d-like,  $J = 7.9$  Hz, 2H), 7.18 (d-like,  $J = 7.9$  Hz, 2H), 5.10 (t,  $J = 8.5$  Hz, 1H), 2.36 (s, 3H).  $^{13}C$  NMR (126 MHz,  $CDCl_3$ )  $\delta$  140.4, 129.7, 129.6 (2C), 129.2 (2C), 128.1 (m), 121.8 (t,  $J = 246.6$  Hz), 121.0 – 120.5 (m), 119.8–106.0 (m), 48.9 (t,  $J = 30.1$  Hz), 21.3.  $^{19}F$  NMR (282 MHz,  $CDCl_3$ )  $\delta$  -73.1 to -74.3 (m, 2F), -81.4 to -81.1 (t,  $J = 9.0$  Hz, 3F), -83.4 to -84.6 (m, 2F), -122.8 (br, 2F), -123.4 (br, 2F), -126.0 to -126.1 (m, 2F), -126.6 to -126.7 (m, 2F). **IR** (KBr): 3748, 3044, 2355, 1517, 1247, 1209, 857, 713, 648, 505  $cm^{-1}$ .

#### 1-(1-bromo-2,2-difluoro-2-((perfluorohexyl)oxy)ethyl)-4-(trifluoromethyl)benzene (4ja)

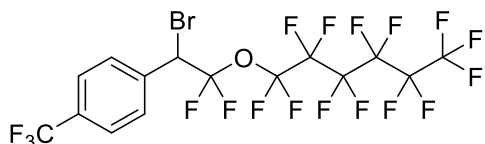

**4ja** (124.3 mg, 0.199 mmol, 66% yield) was obtained by **general procedure D** using fluoroalkene **1j** (61.9 mg, 0.30 mmol), 2,2,3,3,4,4,5,5,6,6,6-undecafluorohexanoyl fluoride **2a** (0.18 mL, 0.90 mmol), KF (52.4 mg, 0.90 mmol) and  $Br_2$  (0.90 mmol). The crude **4ja** was purified by flash chromatography on silica gel (Hexane).

Colorless oil. **HRMS** (FAB)  $m/z$ :  $[M + H]^+$  calculated for  $C_{15}H_6BrF_{18}O$  622.9315; found: 622.9320.  $^1H$  NMR (500 MHz,  $CDCl_3$ )  $\delta$  7.67 – 7.65 (m, 2H), 7.63 – 7.61 (m, 2H), 5.19 – 5.15 (m, 1H).  $^{13}C$  NMR (126 MHz,  $CDCl_3$ )  $\delta$  136.4, 132.5 (q,  $J = 32.8$  Hz), 129.9 (2C), 125.9 (d-like,  $J = 3.7$  Hz, 2C), 124.7 (q,  $J = 273.0$  Hz), 121.8 (t,  $J = 281.2$  Hz), 118.6 – 105.8 (m), 47.7 (t,  $J = 31.0$  Hz).  $^{19}F$  NMR (282 MHz,  $CDCl_3$ )  $\delta$  -63.6 (s, 3F), -72.8 to -74.4 (m, 2F), -81.2 to -81.3 (t-like, 3F), -83.3 to -84.7 (m, 2F), -122.8 (br, 2F), -123.5 (br, 2F), -126.0 (br, 2F), -126.6 to -126.7 (m, 2F). **IR** (KBr): 3540, 3035, 2778, 2122, 1625, 1423, 1245, 1142, 1020, 644, 505  $cm^{-1}$ .

#### 5-(3-bromo-4,4-difluoro-2-methyl-4-((perfluorohexyl)oxy)butyl)benzo[d][1,3]dioxole (4ka)

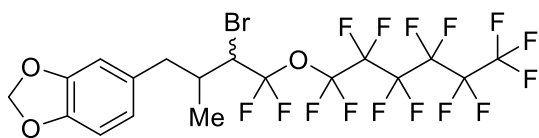

**4ka** (168.5 mg, 0.263 mmol, 88% yield, 1.2:1 *dr*) was obtained by **general procedure E** using fluoroalkene **1k** (67.9 mg, 0.30 mmol), 2,2,3,3,4,4,5,5,6,6,6-undecafluorohexanoyl fluoride **2a** (0.30 mL, 1.5 mmol), KF (87.2 mg, 1.5 mmol) and  $Br_2$  (1.5 mmol). The crude **4ka** was purified by

flash chromatography on silica gel (Hexane/ $Et_2O = 99:1$ ). Colorless oil. **HRMS** (FAB)  $m/z$ :  $[M]^+$  calculated for  $C_{18}H_{12}BrF_{15}O_3$  639.9730; found: 639.9726.  $^1H$  NMR (500 MHz,  $CDCl_3$ )  $\delta$  7.02 (s, 1H), 6.74 (s, 1H), 5.99 – 5.98 (m, 2H), 4.09 – 4.05 (m, 1H), 2.75 to 2.70 (m, 1H), 2.65 – 2.61 (m, 1H), 2.51 – 2.45 (m, 1H), 1.07 (d,  $J = 6.7$  Hz, 3H).  $^{13}C$  NMR (126 MHz,  $CDCl_3$ )  $\delta$  147.6, 147.5, 130.7, 122.7 (t,  $J = 264.9$  Hz), 118.6 – 115.6 (m), 115.1, 113.3, 113.0 – 112.1 (m), 111.0, 110.8 – 106.7 (m), 54.7 (t,  $J = 27.2$  Hz), 41.9, 33.3, 15.0.  $^{19}F$  NMR (282 MHz,  $CDCl_3$ )  $\delta$  -69.8 to -72.4 (m, 2F), -81.2 (t-like, 3F), -83.8 to -84.0 (m, 2F), -122.6 (br, 2F), -123.3 (br, 2F), -126.0 (br, 2F), -126.5 to -126.7 (m, 2F). **IR** (KBr): 2978, 2903, 1747, 1507, 1481, 1335, 1235, 1208, 938, 647  $cm^{-1}$ .

#### tert-butyl 4-(1-bromo-2,2-difluoro-2-((perfluorohexyl)oxy)ethyl)piperidine-1-carboxylate (4la)

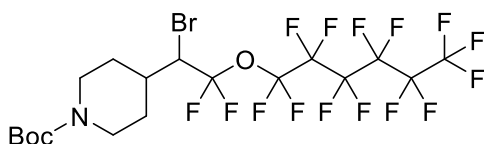

**4la** (152.9 mg, 0.231 mmol, 82% yield) was obtained by **general procedure E** using fluoroalkene **1l** (70.0 mg, 0.28 mmol), 2,2,3,3,4,4,5,5,6,6,6-undecafluorohexanoyl fluoride **2a** (0.30 mL, 1.5 mmol), KF (87.2 mg, 1.5 mmol) and  $Br_2$  (1.5 mmol). The crude **4la** was purified by flash chromatography on silica gel (Hexane/Ethyl Acetate = 9:1). Yellow solid. **Mp.** = 51.6 – 52.3  $^{\circ}C$  (Chloroform).

**HRMS** (ESI)  $m/z$ :  $[M + Na]^+$  calculated for  $C_{18}H_{19}BrF_{15}NNaO_3$  684.0206; found: 684.0218.  $^1H$  NMR (500 MHz,  $CDCl_3$ )  $\delta$  4.22 – 4.08 (br, 2H, (- $CH_2$ -) and, td,  $J = 9.0, 4.0$  Hz, 1H (- $CH$ -) are overlapped), 2.71 (br, 2H), 2.02 – 1.96 (m, 1H), 1.77 – 1.76 (m, 1H), 1.59 – 1.49 (m, 3H), 1.46 (s, 9H).  $^{13}C$  NMR (126 MHz,  $CDCl_3$ )  $\delta$  154.7, 122.5 (t,  $J = 282.1$  Hz), 118.6 – 106.2 (m), 79.9, 54.7 (t,  $J = 28.2$  Hz), 43.4, 42.9, 37.2, 30.4, 28.5 (3C), 27.6.  $^{19}F$  NMR (282 MHz,  $CDCl_3$ )  $\delta$  -70.3 (br, 2F), -81.2 (t,  $J = 8.7$  Hz, 3F), -83.2 to -84.5 (m, 2F), -122.7 (br, 2F), -123.3 (br, 2F),



-126.0 (br, 2F), -126.5 to -126.6 (m, 2F). **IR (KBr)**: 3592, 3411, 2988, 2939, 2337, 1683, 1413, 1243, 1210, 775, 647  $\text{cm}^{-1}$ .

### 2-(3-bromo-3,4,4-trifluoro-4-((perfluorohexyl)oxy)butyl)isoindoline-1,3-dione (**4ma**)

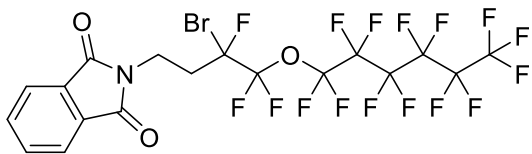

(a) **4ma** (184.7 mg, 0.276 mmol, 92% yield) was obtained by **general procedure E** using fluoroalkene **1m** (76.6 mg, 0.30 mmol), 2,2,3,3,4,4,5,5,6,6,6-undecafluorohexanoyl fluoride **2a** (0.30 mL, 1.5 mmol), KF (88.0 mg, 1.51 mmol) and  $\text{Br}_2$  (1.5 mmol). The crude **4ma** was purified by flash chromatography on silica gel (Hexane/Ethyl Acetate = 19:1). (b) **4ma** (154.5 mg, 0.23 mmol, 85% yield) was obtained by **general procedure D** using fluoroalkene **1v** (70.0 mg, 0.27 mmol), 2,2,3,3,4,4,5,5,6,6,6-undecafluorohexanoyl fluoride **2a** (0.18 mL, 0.9 mmol), KF (52.2 mg, 0.9 mmol) and  $\text{Br}_2$  (0.9 mmol). The crude **4ma** was purified by flash chromatography on silica gel (Hexane/Ethyl Acetate = 19:1).

White solid. **Mp.** = 75.4 – 76.0 °C (Chloroform). **HRMS (FAB)  $m/z$** :  $[\text{M} + \text{H}]^+$  calculated for  $\text{C}_{18}\text{H}_9\text{BrF}_{16}\text{NO}_3$  669.9510; found: 669.9517.  **$^1\text{H NMR}$**  (500 MHz,  $\text{CDCl}_3$ )  $\delta$  7.90 – 7.86 (m, 2H), 7.77 – 7.74 (m, 2H), 4.13 (t,  $J = 7.3$  Hz, 2H), 2.77 – 2.70 (m, 1H), 2.60 – 2.48 (m, 1H).  **$^{13}\text{C NMR}$**  (126 MHz,  $\text{CDCl}_3$ )  $\delta$  167.9 (2C), 134.4 (2C), 132.0 (2C), 123.6 (2C), 121.6-106.1 (m), 100.6 (dt,  $J = 264.9, 34.7$  Hz), 35.4 (d,  $J = 20.0$  Hz), 33.3.  **$^{19}\text{F NMR}$**  (282 MHz,  $\text{CDCl}_3$ )  $\delta$  -81.1 (t,  $J = 9.9$  Hz, 3F), -82.7 to -83.4 (m, 2F), -83.7 to -83.8 (m, 2F), -122.5 (br, 2F), -123.1 (br, 2F), -125.8 (br, 2F), -126.4 to -126.5 (m, 2F), -127.4 to -127.6 (m, 1F). **IR (KBr)**: 3732, 3287, 2958, 2312, 1778, 1715, 1212, 1148, 649, 530, 409  $\text{cm}^{-1}$ .

### 2-(3-bromo-4,4-difluoro-4-((perfluorohexyl)oxy)butyl)isoindoline-1,3-dione (**4sa**)

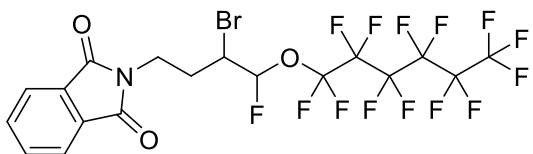

**4sa** (157.4 mg, 0.248 mmol, 51% yield) was obtained by **general procedure D** using fluoroalkene **1s** (107 mg, 0.49 mmol), 2,2,3,3,4,4,5,5,6,6,6-undecafluorohexanoyl fluoride **2a** (0.30 mL, 1.5 mmol), KF (87.2 mg, 1.5 mmol) and  $\text{Br}_2$  (1.5 mmol). The crude **4sa** was purified by flash chromatography on silica gel (Hexane/Ethyl Acetate = 19:1). White solid. **Mp.** = 46.4 – 46.9 °C (Chloroform). **HRMS (FAB)  $m/z$** :  $[\text{M} + \text{H}]^+$  calculated for  $\text{C}_{18}\text{H}_{11}\text{BrF}_{14}\text{NO}_3$  633.9699; found: 633.9708.  **$^1\text{H NMR}$**  (500 MHz,  $\text{CDCl}_3$ )  $\delta$  7.87 – 7.86 (m, 2H), 7.75 – 7.74 (m, 2H), 6.04 (dd,  $J = 56.3, 4.4$  Hz, 1H), 4.08 – 4.04 (m, 1H), 4.00 – 3.89 (m, 2H), 2.48 – 2.42 (m, 1H), 2.23 – 2.15 (m, 1H).  **$^{13}\text{C NMR}$**  (126 MHz,  $\text{CDCl}_3$ )  $\delta$  168.3 (2C), 134.3 (2C), 132.0 (2C), 123.6 (2C), 120.9 – 103.3 (m), 105.2 (dt,  $J = 240.3, 3.7$  Hz), 46.9 (d,  $J = 24.5$  MHz), 35.7, 30.9.  **$^{19}\text{F NMR}$**  (282 MHz,  $\text{CDCl}_3$ )  $\delta$  -81.2 (t,  $J = 9.7$  Hz, 3F), -83.3 to -83.8 (m, 1F), -85.5 to -86.0 (m, 1F), -122.6 (br, 2F), -123.2 (br, 2F), -125.8 (br, 2F), -126.5 to -126.6 (m, 2F), -128.0 to -128.3 (m, 1F). **IR (KBr)**: 3475, 2952, 1945, 1778, 1617, 1356, 1281, 1081, 964, 855, 776  $\text{cm}^{-1}$ .

### 2-(3-bromo-4,4-difluoro-4-((perfluorohexyl)oxy)butyl)isoindoline-1,3-dione (**4ta**)

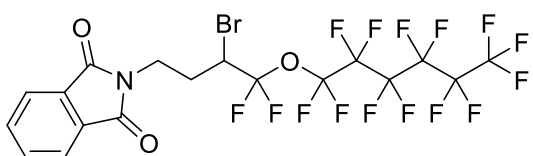

**4ta** (182.8 mg, 0.280 mmol, 93% yield) was obtained by **general procedure D** using fluoroalkene **1t** (71.0 mg, 0.30 mmol), 2,2,3,3,4,4,5,5,6,6,6-undecafluorohexanoyl fluoride **2a** (0.18 mL, 0.9 mmol), KF (52.4 mg, 0.9 mmol) and  $\text{Br}_2$  (0.9 mmol). The crude **4ta** was purified by flash chromatography on silica gel (Hexane/Ethyl Acetate = 19:1). White solid. **Mp.** = 47.3 – 47.6 °C (Chloroform). **HRMS (FAB)  $m/z$** :  $[\text{M} + \text{H}]^+$  calculated for  $\text{C}_{18}\text{H}_{10}\text{BrF}_{15}\text{NO}_3$  651.9605; found: 651.9597.  **$^1\text{H NMR}$**  (500 MHz,  $\text{CDCl}_3$ )  $\delta$  7.89 – 7.87 (m, 2H), 7.76 – 7.75 (m, 2H), 4.20 – 4.14 (m, 1H), 4.01 – 3.89 (m, 2H), 2.54 – 2.47 (m, 1H), 2.25 – 2.18 (m, 1H).  **$^{13}\text{C NMR}$**  (126 MHz,  $\text{CDCl}_3$ )  $\delta$  168.2 (2C), 134.4 (2C), 132.0 (2C), 123.6 (2C), 122.4 (t,  $J = 281.2$  Hz) 120.9 – 105.9 (m), 46.1 (t,  $J = 30.0$  MHz), 30.9.  **$^{19}\text{F NMR}$**  (282 MHz,  $\text{CDCl}_3$ )  $\delta$  -74.4 to -75.8 (m, 2F), -81.2 (t,  $J = 9.7$  Hz, 3F), -83.9 to -84.0 (m, 2F), -122.6 (br, 2F), -123.3 (br, 2F), -126.0 (br, 2F), -126.5 to -126.6 (m, 2F). **IR (KBr)**: 3856, 3615, 2967, 1617, 1470, 1442, 1006, 989, 850, 776  $\text{cm}^{-1}$ .

## 6. Bromo-perfluoroalkoxylation (C3 to C5) of *gem*-difluoroalkenes 1

### 6-1. General Procedure F for Bromo-perfluoroalkoxylation

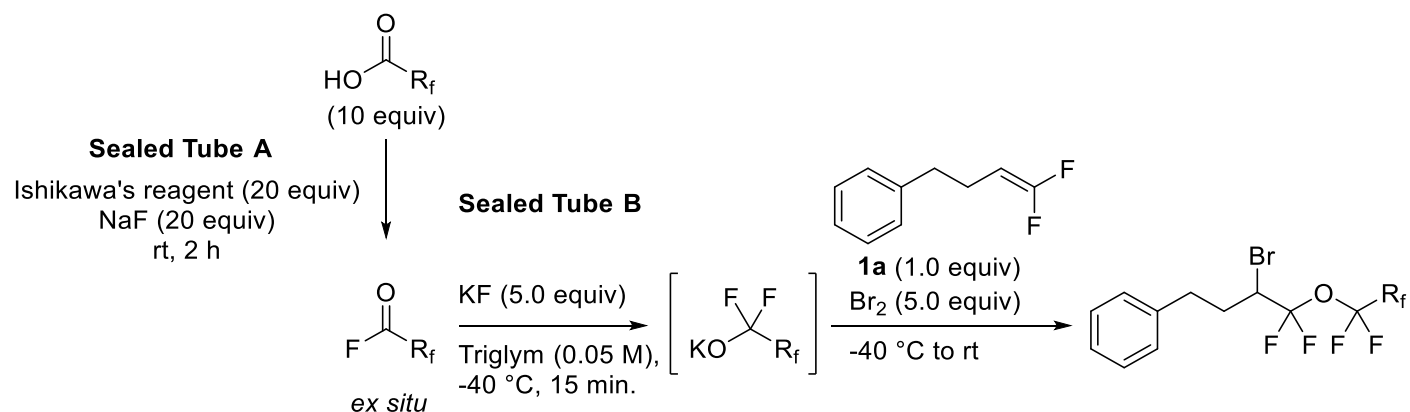

To a 15-mL oven-dried sealed tube (A) equipped with a magnetic stir bar was added NaF (252 mg, 6.0 mmol, 20 equiv) in the glove box. Tube (A) was removed out of glove box and Ishikawa's Reagent (1.1 mL, 6.0 mmol, 20 equiv) was added under  $\text{N}_2$ . To another 15-mL oven-dried sealed tube (B) equipped with a magnetic stir bar were added KF (5.0 equiv) and 5.0 mL dry triglym in the glove box and Tube (B) was removed out of glove box. Tube (A) was placed into liquid  $\text{N}_2$ , and perfluorocarboxylic acid (3.0 mmol, 10 equiv) was added until the solution was frozen. Tube (A) was sealed. The mixture was warmed to room temperature and stirred for 2 h. Tube (B) was evacuated for 1-2 seconds before it was connected with tube (A) through a gas-tube and tube (A) was stirred at rt while tube (B) was cooled to  $-78\text{ }^\circ\text{C}$ . The  $\text{R}_f\text{COF}$  was transferred from tube (A) to tube (B) for 15 min. Then the Tube (B) was sealed again, warmed up to  $-40\text{ }^\circ\text{C}$ . After stirring for 15 min at  $-40\text{ }^\circ\text{C}$ , fluoroalkene **1a** (0.3 mmol, 1.0 eq) was added, followed by one-portion addition of  $\text{Br}_2$  (1.5 mmol, 5.0 eq) in 1.0 mL triglym and the mixture was warmed up to rt and stirred at room temperature for 6 h. The reaction mixture was quenched with saturated  $\text{NaHCO}_3$  aq and  $\text{Na}_2\text{SO}_3$  aq. The product was extracted with  $\text{Et}_2\text{O}$  (10 mL x 3) and washed with Brine. The organic phase was dried over anhydrous  $\text{Na}_2\text{SO}_4$  and concentrated under reduced pressure. The product was purified by column chromatography on silica gel using hexane as eluent.

#### (3-bromo-4,4-difluoro-4-(perfluoropropoxy)butyl)benzene (**4ab**)

**4ab** (98.9 mg, 0.228 mmol, 76% yield) was obtained by **general procedure F** using fluoroalkene **1a** (51.2 mg, 0.30 mmol), 2,2,3,3,3-pentafluoropropanoyl fluoride (excess), KF (87.2 mg, 1.5 mmol) and  $\text{Br}_2$  (1.5 mmol). The crude **4ab** was purified by flash chromatography on silica gel (Hexane). Colorless oil. **HRMS** (FAB)  $m/z$ :  $[\text{M}]^+$  calculated for  $\text{C}_{13}\text{H}_{10}\text{BrF}_9\text{O}$  431.9771; found: 431.9781.  **$^1\text{H}$  NMR** (500 MHz,  $\text{CDCl}_3$ )  $\delta$  7.34 – 7.20 (m, 5H), 3.98 – 3.92 (m, 1H), 3.03 – 2.98 (m, 1H), 2.78 – 2.72 (m, 1H), 2.36 – 2.29 (m, 1H), 2.18 – 2.11 (m, 1H).  **$^{13}\text{C}$  NMR** (126 MHz,  $\text{CDCl}_3$ )  $\delta$  139.2, 128.9 (2C), 128.6 (2C), 126.9, 122.7 (t,  $J = 280.4$  Hz), 121.0 – 120.7 (m), 118.7 – 104.1 (m), 48.5 (t,  $J = 30.0$  Hz), 32.9, 32.6.  **$^{19}\text{F}$  NMR** (282 MHz,  $\text{CDCl}_3$ )  $\delta$  -74.6 to -74.7 (m, 2F), -81.5 (t,  $J = 7.4$  Hz, 3F), -85.2 to -85.3 (m, 2F), -130.4 (s, 2F). **IR (KBr)**: 3441, 3033, 2938, 2354, 1456, 1341, 1232, 1071, 755, 504  $\text{cm}^{-1}$ .

#### (3-bromo-4,4-difluoro-4-(perfluorobutoxy)butyl)benzene (**4ac**)

**4ac** (94.6 mg, 0.196 mmol, 65% yield) was obtained by **general procedure F** using fluoroalkene **1a** (50.5 mg, 0.30 mmol), 2,2,3,3,4,4,4-heptafluorobutanoyl fluoride (excess), KF (87.2 mg, 1.5 mmol) and  $\text{Br}_2$  (1.5 mmol). The crude **4ac** was purified by flash chromatography on silica gel (Hexane). Colorless oil. **HRMS** (FAB)  $m/z$ :  $[\text{M}]^+$  calculated for  $\text{C}_{14}\text{H}_{10}\text{BrF}_{11}\text{O}$  481.9739; found: 481.9745.  **$^1\text{H}$  NMR** (500 MHz,  $\text{CDCl}_3$ )  $\delta$  7.35 – 7.32 (m, 2H), 7.27 – 7.21 (m, 3H), 3.99 – 3.93 (m, 1H), 3.04 – 2.99 (m, 1H), 2.79 – 2.73 (m, 1H), 2.37 – 2.30 (m, 1H), 2.19 – 2.11 (m, 1H).  **$^{13}\text{C}$  NMR** (126 MHz,  $\text{CDCl}_3$ )  $\delta$  139.2, 128.9 (2C), 128.6 (2C), 126.9,

122.7 (t,  $J = 281.2$  Hz), 118.7 – 105.3 (m), 48.4 (t,  $J = 29.1$  Hz), 32.9, 32.6.  $^{19}\text{F}$  NMR (282 MHz,  $\text{CDCl}_3$ )  $\delta$  -74.6 to -74.7 (m, 2F), -81.4 (t,  $J = 8.9$  Hz, 3F), -84.3 (m, 2F), -126.8 (m, 2F), -127.0 (m, 2F). IR (KBr): 3854, 3032, 2960, 2368, 1604, 1239, 1214, 903, 748, 698  $\text{cm}^{-1}$ .

### (3-bromo-4,4-difluoro-4-((perfluoropentyl)oxy)butyl)benzene (4ad)

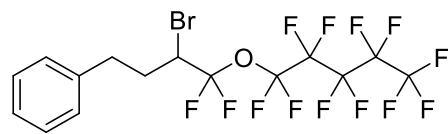

**4ad** (179.9 mg, 0.337 mmol, 99% yield) was obtained by **general procedure F** using fluoroalkene **1a** (57.1 mg, 0.34 mmol), 2,2,3,3,4,4,5,5,5-nonafluoropentanoyl fluoride (excess), KF (87.15 mg, 1.5 mmol) and  $\text{Br}_2$  (1.5 mmol). The crude **4ad** was purified by flash chromatography on silica gel (Hexane). Colorless oil. HRMS (FAB)  $m/z$ :  $[\text{M}]^+$  calculated for  $\text{C}_{15}\text{H}_{10}\text{BrF}_{13}\text{O}$  531.9707; found: 531.9704.  $^1\text{H}$  NMR (500 MHz,  $\text{CDCl}_3$ )  $\delta$  7.32 (t-like,  $J = 7.3$  Hz, 2H), 7.26 – 7.20 (m, 3H), 3.98 – 3.92 (m, 1H), 3.03 – 2.98 (m, 1H), 2.78 – 2.72 (m, 1H), 2.36 – 2.30 (m, 1H), 2.19 – 2.11 (m, 1H).  $^{13}\text{C}$  NMR (126 MHz,  $\text{CDCl}_3$ )  $\delta$  139.2, 128.9 (2C), 128.6 (2C), 126.9, 122.7 (t,  $J = 267.5$  Hz), 121.0 – 120.6 (m), 118.7 – 105.8 (m), 48.4 (t,  $J = 29.1$  Hz), 32.9, 32.6.  $^{19}\text{F}$  NMR (282 MHz,  $\text{CDCl}_3$ )  $\delta$  -74.7 to -74.8 (m, 2F), -81.2 (t,  $J = 9.9$  Hz, 3F), -84.1 (m, 2F), -123.5 to -123.6 (m, 2F), -126.3 (m, 2F), -126.7 to -126.8 (m, 2F). IR (KBr): 3747, 3647, 3033, 2357, 1498, 1242, 1213, 735, 702, 413  $\text{cm}^{-1}$ .

### 5-2. Procedure for G for Bromo-heptafluoroisopropoxylation

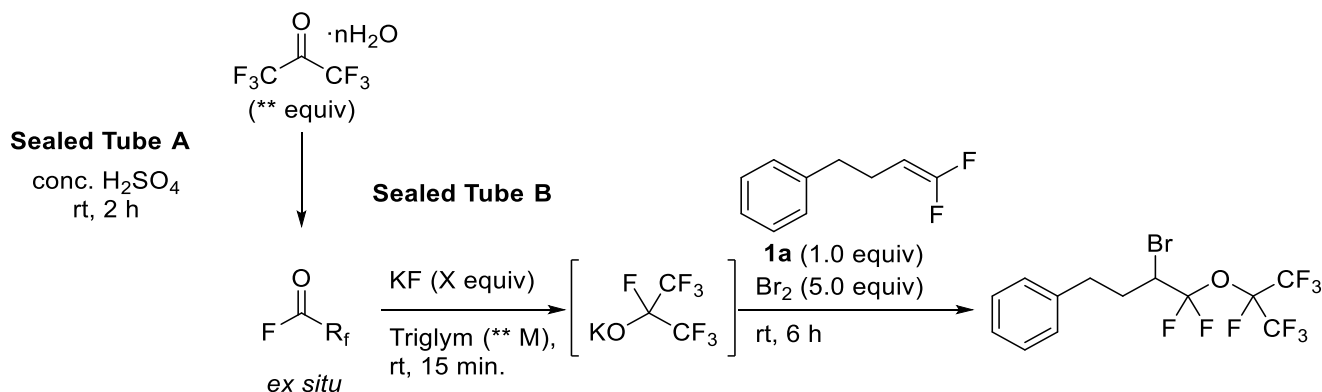

To a 15-mL oven-dried sealed tube (B) equipped with a magnetic stir bar were added KF (87.2 mg, 1.5 mmol, 5.0 equiv) and 5.0 mL dry triglym in the glove box and Tube (B) was removed out of glove box. To another 15-mL oven-dried sealed tube (A) equipped with a magnetic stir bar were added conc.  $\text{H}_2\text{SO}_4$  (8.0 mL). Tube (A) was placed into liquid  $\text{N}_2$ , and Hexafluoroacetone Hydrate (0.4 mL) was added until the solution was frozen. Tube (A) was sealed. The mixture was warmed to  $50^\circ\text{C}$  and stirred for 1 h. Tube (B) was evacuated for 1-2 seconds before it was connected with tube (A) through a gas-tube and tube (A) was stirred at  $50^\circ\text{C}$  while tube (B) was cooled to  $-78^\circ\text{C}$ . The hexafluoroacetone was transferred from tube (A) to tube (B) for 15 min. Then the Tube (B) was sealed again, warmed up to  $-40^\circ\text{C}$ . After stirring for 15 min at  $-40^\circ\text{C}$ , fluoroalkene **1a** (50.5 mg, 0.30 mmol, 1.0 equiv) was added, followed by one-portion addition of  $\text{Br}_2$  (1.5 mmol, 5.0 eq) in 1.0 mL triglym and the mixture was warmed up to rt and stirred at room temperature for 6 h. The reaction mixture was quenched with saturated  $\text{NaHCO}_3$  aq and  $\text{Na}_2\text{SO}_3$  aq. The product was extracted with  $\text{Et}_2\text{O}$  (10 mL x 3) and washed with Brine. The organic phase was dried over anhydrous  $\text{Na}_2\text{SO}_4$  and concentrated under reduced pressure. The crude product was purified by silica gel chromatography (Hexane) to obtain as colourless oil.

### (3-bromo-4,4-difluoro-4-((perfluoropropan-2-yl)oxy)butyl)benzene (4ae)

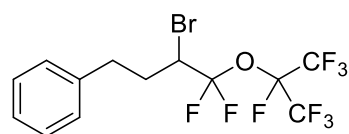

**4ae** (107.8 mg, 0.249 mmol, 83% yield). HRMS (FAB)  $m/z$ :  $[\text{M}]^+$  calculated for  $\text{C}_{13}\text{H}_{10}\text{BrF}_9\text{O}$  431.9771; found: 431.9763.  $^1\text{H}$  NMR (500 MHz,  $\text{CDCl}_3$ )  $\delta$  7.34 – 7.31 (m, 2H), 7.26 – 7.20 (m, 3H), 4.01 – 3.95 (m, 1H), 3.03 – 2.97 (m, 1H), 2.78 – 2.72 (m, 1H), 2.37 – 2.31 (m, 1H), 2.20 – 2.12 (m, 1H).  $^{13}\text{C}$  NMR (126 MHz,  $\text{CDCl}_3$ )  $\delta$  139.3, 128.9 (2C), 128.7 (2C), 126.8, 122.6 (td,  $J = 279.3, 3.7$  Hz), 119.0 (qd,  $J =$

290.3, 31.8 Hz, 2C), 102.6 (dq,  $J = 266.6, 38.3$  Hz), 48.9 (t,  $J = 38.2$  Hz), 33.1, 32.7.  $^{19}\text{F}$  NMR (282 MHz,  $\text{CDCl}_3$ )  $\delta$  -72.1 to -73.5 (m, 2F), -80.7 (s, 6F), -146.3 (t,  $J = 22.8$  Hz, 1F). IR (KBr): 3853, 3465, 3028, 2933, 2350, 1249, 1139, 987, 701, 444  $\text{cm}^{-1}$ .

## 7. Chloro-perfluoroalkoxylation of *gem*-difluoroalkenes 1

### 7-1. General Procedure H for Chloro-perfluoroalkoxylation

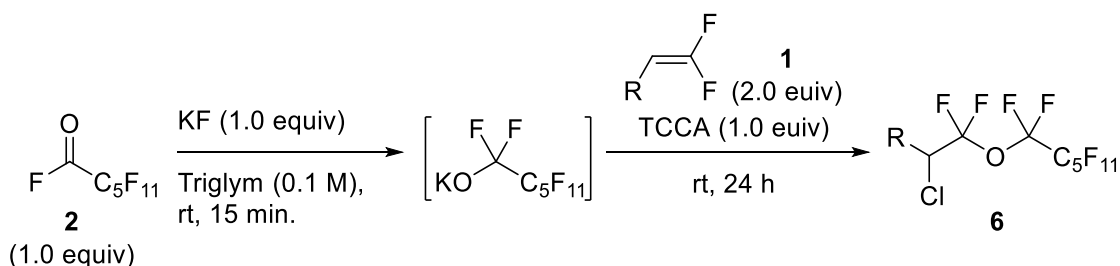

In an nitrogen gas-filled glovebox, KF (0.3 mmol, 1.0 eq), triglym (3.0 mL), and perfluoroacyl fluoride (0.3 mmol, 1.0 eq) was added to a 20 mL round-bottom flask equipped with a magnetic stir bar. After stirring for 15 min at room temperature, fluoroalkene (0.6 mmol, 2.0 eq) was added, followed by one-portion addition of TCCA (0.3 mmol, 1.0 eq) and the mixture was stirred at room temperature for 24 h. The reaction mixture was quenched with saturated  $\text{NaHCO}_3$  aq and  $\text{Na}_2\text{SO}_3$  aq. The product was extracted with  $\text{Et}_2\text{O}$  (10 mL x 3) and washed with Brine. The organic phase was dried over anhydrous  $\text{Na}_2\text{SO}_4$  and concentrated under reduced pressure. The product was purified by column chromatography on silica gel using hexane or hexane/Ethyl Acetate as eluent.

#### (3-chloro-4,4-difluoro-4-((perfluorohexyl)oxy)butyl)benzene (**6aa**)

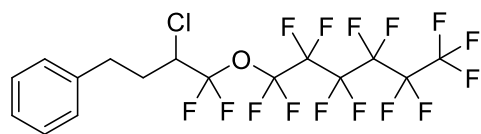

**6aa** (87.1 mg, 0.162 mmol, 53% yield) was obtained by **general procedure H** using fluoroalkene **1a** (100.9 mg, 0.60 mmol), 2,2,3,3,4,4,5,5,6,6,6-undecafluorohexanoyl fluoride **2a** (94.8 mg, 0.30 mmol), KF (17.4 mg, 0.30 mmol) and TCCA (69.7 mg, 0.30 mmol). The crude **6aa** was purified by flash chromatography on silica gel (Hexane). Colorless oil. HRMS (ESI)  $m/z$ :  $[\text{M} + \text{H}]^+$  calculated for  $\text{C}_{16}\text{H}_{11}\text{OF}_{15}\text{Cl}$  539.0259; found: 539.0234.  $^1\text{H}$  NMR (500 MHz,  $\text{CDCl}_3$ )  $\delta$  7.34-7.31 (m, 2H), 7.26-7.23 (m, 1H), 7.21-7.19 (m, 2H), 3.98-3.93 (m, 1H), 3.02-2.97 (m, 1H), 2.79-2.73 (m, 1H), 2.32-2.25 (m, 1H), 2.12-2.05 (m, 1H).  $^{13}\text{C}$  NMR (126 MHz,  $\text{CDCl}_3$ )  $\delta$  139.3, 128.9 (2C), 128.6 (2C), 126.8, 122.9 (t,  $J = 280.6$  Hz), 121.0-105.9 (m, 6C), 58.1 (t,  $J = 30.0$  Hz), 32.5, 31.5.  $^{19}\text{F}$  NMR (282 MHz,  $\text{CDCl}_3$ )  $\delta$  -77.2 to -77.3 (m, 2F), -81.2 (t,  $J = 9.9$  Hz, 3F), -83.8 (br, 2F), -122.7 (br, 2F), -123.2 to -123.3 (m, 2F), -126.0 (br, 2F), -126.5 to -126.6 (m, 2F). IR (KBr): 3567, 3032, 2363, 1605, 1498, 1339, 1201, 954, 777, 556  $\text{cm}^{-1}$ .

#### 4-(((4-chloro-5,5-difluoro-5-((perfluorohexyl)oxy)pentyl)oxy)methyl)-1,1'-biphenyl (**6ba**)

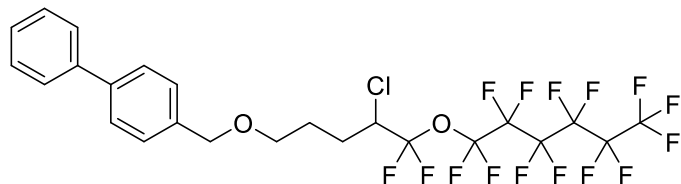

**6ba** (82.5 mg, 0.120 mmol, 40% yield) was obtained by **general procedure H** using fluoroalkene **1b** (173 mg, 0.60 mmol), 2,2,3,3,4,4,5,5,6,6,6-undecafluorohexanoyl fluoride **2a** (94.8 mg, 0.30 mmol), KF (17.4 mg, 0.3 mmol) and TCCA (69.7 mg, 0.3 mmol). The crude **6ba** was purified by flash chromatography on silica gel (Hexane). Colorless oil. HRMS (ESI)  $m/z$ :  $[\text{M} + \text{Na}]^+$  calculated for  $\text{C}_{24}\text{H}_{18}\text{O}_2\text{F}_{15}\text{NaCl}$  681.0654; found: 681.0630.  $^1\text{H}$  NMR (500 MHz,  $\text{CDCl}_3$ )  $\delta$  7.59-7.57 (m, 4H), 7.45-7.33 (m, 5H), 4.55 (s, 2H), 4.19-4.13 (m, 1H), 3.59-3.51 (m, 2H), 2.23-2.17 (m, 1H), 2.00-1.93 (m, 1H), 1.90-1.75 (m, 2H).  $^{13}\text{C}$  NMR (126 MHz,  $\text{CDCl}_3$ )  $\delta$  141.0, 140.8, 137.3, 128.9 (2C), 128.2 (2C), 127.4, 127.3 (2C), 127.2 (2C), 122.9 (t,  $J = 280.6$  Hz),  $\delta$  118.7-105.9 (m, 6C),  $\delta$  72.9, 69.0, 59.1 (t,  $J = 30.4$  Hz), 28.2, 26.0.  $^{19}\text{F}$  NMR (282 MHz,  $\text{CDCl}_3$ )  $\delta$  -76.8 to -78.1 (m, 2F), -81.2 (t,  $J = 9.9$  Hz, 3F), -83.8 to -84.0 (m, 2F), -122.7 (br, 2F), -123.3 (br, 2F), -126.0 (br, 2F), -126.5 to -126.6 (m, 2F). IR (KBr): 3430, 3060, 2933, 2862, 2345, 1782, 1488, 1238, 844, 698  $\text{cm}^{-1}$ .

### 5-chloro-6,6-difluoro-6-((perfluorohexyl)oxy)hexyl benzoate (6da)

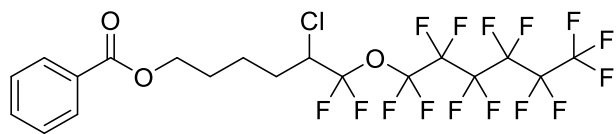

**6da** (97.7 mg, 0.160 mmol, 53% yield) was obtained by **general procedure H** using fluoroalkene **1d** (144.2 mg, 0.60 mmol), 2,2,3,3,4,4,5,5,6,6,6-undecafluorohexanoyl fluoride **2a** (94.8 mg, 0.30

mmol), KF (17.4 mg, 0.3 mmol) and TCCA (69.7 mg, 0.3 mmol). The crude **6da** was purified by flash chromatography on silica gel (Hexane/EtOAc = 98:2). Colorless oil. **HRMS** (ESI)  $m/z$ :  $[M + Na]^+$  calculated for  $C_{19}H_{14}O_3F_{15}NaCl$  633.0290; found: 633.0290.  **$^1H$  NMR** (500 MHz,  $CDCl_3$ )  $\delta$  8.05-8.03 (m, 2H), 7.58-7.55 (m, 1H), 7.46-7.43 (m, 2H), 4.39-4.32 (m, 2H), 4.12-4.07 (m, 1H), 2.10-2.04 (m, 1H), 1.90-1.77 (m, 4H), 1.67-1.56 (m, 1H).  **$^{13}C$  NMR** (126 MHz,  $CDCl_3$ )  $\delta$  166.7, 133.1, 130.3, 129.7 (2C), 128.5 (2C), 122.8 (t,  $J = 281.1$  Hz),  $\delta$  120.7-106.2 (m, 6C), 64.4, 59.0 (t,  $J = 30.4$  Hz), 30.7, 28.1, 22.7.  **$^{19}F$  NMR** (282 MHz,  $CDCl_3$ )  $\delta$  -76.7 to -78.0 (m, 2F), -81.2 (t,  $J = 9.9$  Hz, 3F), -83.8 to -83.9 (m, 2F), -122.7 (br, 2F), -123.2 (br, 2F), -126.0 (br, 2F), -126.4 to -126.6 (m, 2F). **IR (KBr)**: 3446, 3073, 2962, 2365, 1968, 1722, 1610, 1463, 1252, 777  $cm^{-1}$ .

### 5-chloro-6,6-difluoro-6-((perfluorohexyl)oxy)hexyl 4-methylbenzenesulfonate (6ea)

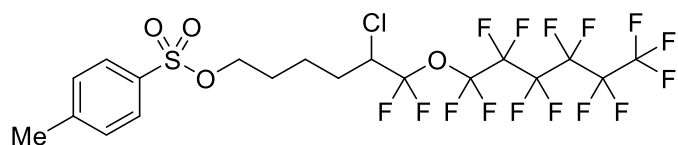

**6ea** (91.0 mg, 0.140 mmol, 46% yield) was obtained by **general procedure H** using fluoroalkene **1e** (174.2 mg, 0.60 mmol), 2,2,3,3,4,4,5,5,6,6,6-undecafluorohexanoyl fluoride **2a** (94.8 mg,

0.30 mmol), KF (17.4 mg, 0.3 mmol) and TCCA (69.7 mg, 0.3 mmol). The crude **6ea** was purified by flash chromatography on silica gel (Hexane:EtOAc = 95:5). Colorless oil. **HRMS** (ESI)  $m/z$ :  $[M + Na]^+$  calculated for  $C_{19}H_{16}O_4F_{15}NaSCl$  683.0116; found: 683.0129.  **$^1H$  NMR** (500 MHz,  $CDCl_3$ )  $\delta$  7.80-7.79 (m, 2H), 7.36-7.35 (m, 2H), 4.09-3.97 (m, 3H), 2.45 (s, 3H), 1.96-1.89 (m, 1H), 1.75-1.65 (m, 4H), 1.51-1.42 (m, 1H).  **$^{13}C$  NMR** (126 MHz,  $CDCl_3$ )  $\delta$  145.1, 133.1, 130.0 (2C), 128.0 (2C), 122.7 (t,  $J = 281.1$  Hz),  $\delta$  120.4-105.9 (m, 6C), 69.8, 58.8 (t,  $J = 30.4$  Hz), 30.3, 28.2, 22.0, 21.7.  **$^{19}F$  NMR** (282 MHz,  $CDCl_3$ )  $\delta$  -76.8 to -78.2 (m, 2F), -81.2 (t,  $J = 10.0$  Hz, 3F), -83.8 to -83.9 (m, 2F), -122.7 (br, 2F), -123.2 (br, 2F), -126.0 (br, 2F), -126.5 to -126.5 (m, 2F). **IR (KBr)**: 3467, 2962, 2588, 2365, 1924, 1665, 1599, 1460, 967, 531  $cm^{-1}$ .

### 2-(3-chloro-4,4-difluoro-4-((perfluorohexyl)oxy)butyl)isoindoline-1,3-dione (6ta)

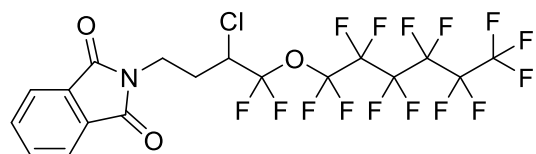

**6ta** (104 mg, 0.171 mmol, 57% yield) was obtained by **general procedure H** using fluoroalkene **1t** (142.3 mg, 0.60 mmol), 2,2,3,3,4,4,5,5,6,6,6-undecafluorohexanoyl fluoride **2a** (94.8 mg, 0.30 mmol), KF (17.4 mg, 0.3

mmol) and TCCA (69.7 mg, 0.3 mmol). The crude **6ta** was purified by flash chromatography on silica gel (Hexane/Et<sub>2</sub>O = 9:1). Colorless oil. **HRMS** (ESI)  $m/z$ :  $[M + Na]^+$  calculated for  $C_{18}H_9NO_3F_{15}NaCl$  629.9929; found: 629.9918.  **$^1H$  NMR** (500 MHz,  $CDCl_3$ )  $\delta$  7.89-7.84 (m, 2H), 7.78-7.70 (m, 2H), 4.22-4.16 (m, 1H), 4.01-3.90 (m, 2H), 2.47-2.41 (m, 1H), 2.18-2.11 (m, 1H)  $\delta$  7.89-7.84 (m, 2H), 7.78-7.70 (m, 2H), 4.22-4.16 (m, 1H), 4.01-3.90 (m, 2H), 2.47-2.41 (m, 1H), 2.18-2.11 (m, 1H).  **$^{13}C$  NMR** (126 MHz,  $CDCl_3$ )  $\delta$  168.2 (2C), 134.4 (2C), 132.0 (2C), 123.6 (2C),  $\delta$  123.6 (t,  $J = 140.3$  Hz), 120.9-107.7 (m, 6C), 56.8 (t,  $J = 30.9$  Hz), 34.6, 30.4.  **$^{19}F$  NMR** (282 MHz,  $CDCl_3$ )  $\delta$  -77.6 (ddtd,  $J = 219.8, 140.7, 13.5, 6.5$  Hz, 2F), -81.2 (t,  $J = 9.9$  Hz, 3F), -83.8 to -83.9 (m, 2F), -122.7 (br, 2F), -123.3 (br, 2F), -126.0 (br, 2F), -126.5 to -126.6 (m, 2F). **IR (KBr)**: 3464, 3227, 3066, 2926, 2696, 2403, 1738, 1228, 851, 571  $cm^{-1}$ .

## 8. Synthetic application of compound 3aa

### 8-1. Procedure for preparation of 1-((1,1-difluoro-1-((perfluorohexyl)oxy)-4-phenylbutan-2-yl)oxy)-2,2,6,6-tetramethylpiperidine (7)

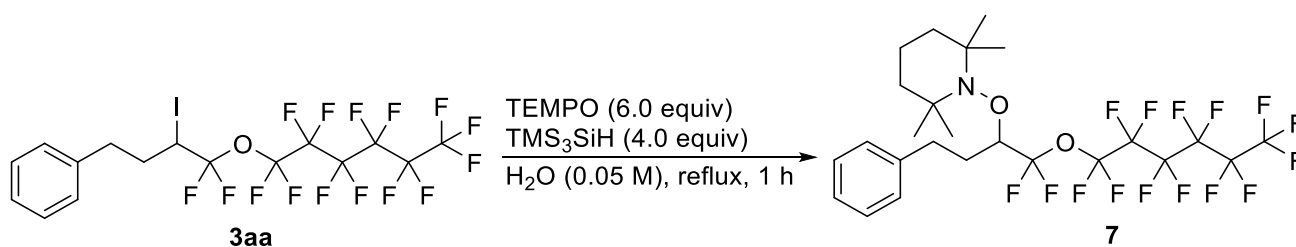

In a round bottom flask, (4,4-difluoro-3-iodo-4-((perfluorohexyl)oxy)butyl)benzene (**3aa**: 1.0 equiv, 504.1 mg, 0.80 mmol) and TEMPO (750.0 mg, 4.80 mmol, 6.0 equiv) was dissolved in degassed H<sub>2</sub>O (0.05 M). Then, the solution was heated under reflux. Tris(trimethylsilyl)silane (TMS<sub>3</sub>SiH: 795.7 mg, 3.20 mmol, 4.0 equiv.) was added in three portions every 60 min. After the last addition of TMS<sub>3</sub>SiH, the mixture was heated under reflux for another 1 h. After completion, the solution was diluted with CH<sub>2</sub>Cl<sub>2</sub>. The mixture was extracted with CH<sub>2</sub>Cl<sub>2</sub> 3 times and washed with Brine. The organic phase was dried over anhydrous Na<sub>2</sub>SO<sub>4</sub> and concentrated under reduced pressure. The crude product was purified by silica gel chromatography (Hexane) to obtain the compounds **7** as colourless oil (381.9 mg, 0.567 mmol, 71% yield).

**HRMS (FAB) *m/z***: [M + H]<sup>+</sup> calculated for C<sub>25</sub>H<sub>29</sub>F<sub>15</sub>NO<sub>2</sub> 660.1959; found: 660.1972. **<sup>1</sup>H NMR** (500 MHz, CDCl<sub>3</sub>) δ 7.31 – 7.28 (m, 2H), 7.22 – 7.19 (m, 3H), 4.29 – 4.24 (m, 1H), 2.85 – 2.79 (m, 1H), 2.75 – 2.69 (m, 1H), 2.60 – 2.53 (m, 1H), 2.00 – 1.92 (m, 1H), 1.59 – 1.26 (m, 6H), 1.13 (d, *J* = 17.1 Hz, 6H), 1.06 (d, *J* = 18.6 Hz, 6H). **<sup>13</sup>C NMR** (126 MHz, CDCl<sub>3</sub>) δ 141.4, 128.6 (2C), 128.5 (2C), 126.2, 124.2 (t, *J* = 284.9 Hz), 120.7 – 106.0 (m), 80.7 (t, *J* = 25.5 Hz), 61.4, 60.1, 40.7, 40.5, 33.7, 32.2, 29.4 (2C), 20.3 (2C), 17.2. **<sup>19</sup>F NMR** (282 MHz, CDCl<sub>3</sub>) δ -75.8 to -77.6 (m, 2F), -81.3 (t, *J* = 9.9 Hz, 3F), -83.4 to -83.6 (m, 2F), -122.6 to -122.7 (m, 2F), -123.4 (br, 2F), -126.1 (m, 2F), -126.6 to -126.7 (m, 2F). **IR (KBr)**: 3650, 3423, 2941, 2311, 1456, 1244, 1209, 741, 711, 407 cm<sup>-1</sup>.

### 8-2. Procedure for preparation of 1,1-difluoro-1-((perfluorohexyl)oxy)-4-phenylbutan-2-ol (8)

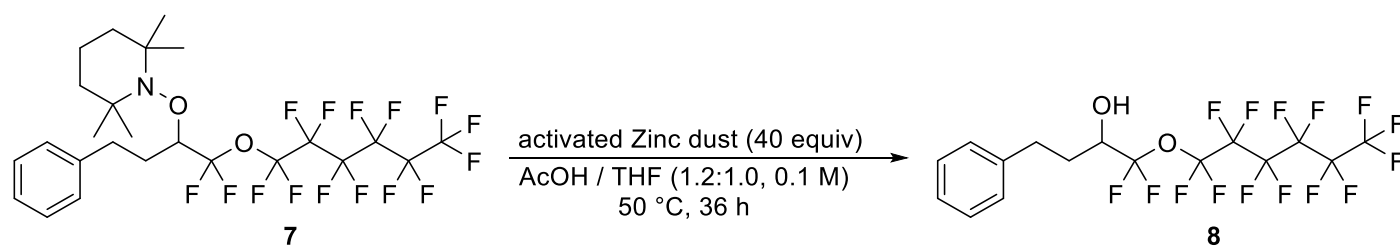

In a round bottom flask, 1-((1,1-difluoro-1-((perfluorohexyl)oxy)-4-phenylbutan-2-yl)oxy)-2,2,6,6-tetramethylpiperidine (**7**: 1.0 equiv, 134.7 mg, 0.200 mmol) was dissolved in acetic acid/THF (1.2:1, 0.1 M). Activated Zinc dust (520 mg, 7.95 mmol, 39.8 equiv) was added, and the reaction mixture was stirred at 50 °C for 36 h. After completion, the mixture was cooled to rt, and diluted with Et<sub>2</sub>O. The solution was filtered through a plug of silica, which was subsequently washed with Ethyl Acetate. The solvent was removed under reduced pressure. The crude product was purified by silica gel chromatography (Hexane/Ethyl Acetate = 96:4) to obtain the compounds **8**. The characterization data of the compound **7** as yellow oil (103.5 mg, 0.198 mmol, 99% yield).

**HRMS (FAB) *m/z***: [M]<sup>+</sup> calculated for C<sub>16</sub>H<sub>11</sub>F<sub>15</sub>O<sub>2</sub> 520.0520; found: 520.0510. **<sup>1</sup>H NMR** (500 MHz, CDCl<sub>3</sub>) δ 7.33 – 7.30 (m, 2H), 7.24 – 7.20 (m, 3H), 3.90 – 3.84 (m, 1H), 2.96 – 2.91 (m, 1H), 2.77 – 2.71 (m, 1H), 2.15 (d, *J* = 6.1 Hz, 1H), 2.04 – 1.98 (m, 1H), 1.95 – 1.88 (m, 1H). **<sup>13</sup>C NMR** (126 MHz, CDCl<sub>3</sub>) δ 140.4, 128.8 (2C), 128.6 (2C), 126.5, 123.8 (t, *J* = 283.1 Hz), 116.1 – 108.3 (m), 70.9 (t, *J* = 28.2 Hz), 31.0, 30.8. **<sup>19</sup>F NMR** (282 MHz, CDCl<sub>3</sub>) δ -81.2 (t, *J* = 9.9 Hz, 3F), -83.1 to -83.3 (m, 2F), -83.6 to -83.7 (m, 2F), -122.8 (br, 2F), -123.3 to -123.4 (m, 2F), -126.1 to -126.1 (m, 2F), -126.5 to -126.7 (m, 2F). **IR (KBr)**: 3868, 3444, 2966, 2317, 1714, 1249, 1207, 804, 700, 531 cm<sup>-1</sup>.

### 8-3. Procedure for preparation of (4,4-difluoro-4-((perfluorohexyl)oxy)butyl)benzene (9)

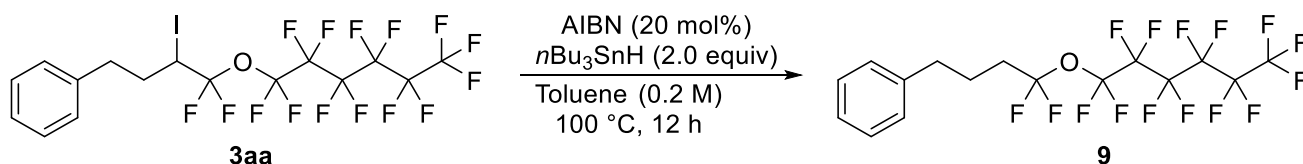

In a round bottom flask, (4,4-difluoro-3-iodo-4-((perfluorohexyl)oxy)butyl)benzene (**3aa**: 189.0 mg, 0.3 mmol, 1.0 equiv) was dissolved in Toluene (0.2 M). AIBN (9.9 g, 0.06 mmol, 20 mol%), and *n*Bu<sub>3</sub>SnH (0.161 mL, 0.6 mmol, 2.0 equiv.) were added to the solution. Then, the reaction mixture was warmed up to 100 °C and stirred at 100 °C for 12 h. After completion, the solution was quenched with KF (5%) aq., and extracted with Et<sub>2</sub>O. The organic layer was washed with brine, and dried over Na<sub>2</sub>SO<sub>4</sub>. The solvent was removed under reduced pressure. The crude product was purified by silica gel chromatography (Hexane) to obtain the compound **9** as colourless oil (141.2 mg, 0.28 mmol, 93% yield).

**HRMS** (FAB) *m/z*: [M]<sup>+</sup> calculated for C<sub>16</sub>H<sub>11</sub>F<sub>15</sub>O 504.0570; found: 504.0562. **<sup>1</sup>H NMR** (500 MHz, CDCl<sub>3</sub>) δ: 7.32 – 7.29 (m, 2H), 7.25 – 7.21 (m, 1H), 7.18 – 7.16 (m, 2H), 2.69 (t, *J* = 7.6 Hz, 2H), 2.16 – 2.08 (m, 2H), 1.92 – 1.86 (m, 2H). **<sup>13</sup>C NMR** (126 MHz, CDCl<sub>3</sub>) δ: 140.7, 128.8 (2C), 128.5 (2C), 126.5, 125.8 (t, *J* = 278.5 Hz), 121.0 – 106.0 (m), 35.3 (t, *J* = 25.5 Hz), 34.7, 23.6. **<sup>19</sup>F NMR** (282 MHz, CDCl<sub>3</sub>) δ -69.7 to -69.8 (m, 2F), -81.3 (t, *J* = 9.4 Hz, 3F), -83.8 to -83.9 (m, 2F), -122.9 (br, 2F), -123.4 (br, 2F), -126.3 (br, 2F), -126.6 to -126.7 (m, 2F). **IR** (KBr): 3459, 2955, 2873, 2339, 1457, 1246, 1006, 745, 530, 425 cm<sup>-1</sup>.

### 8-4. Procedure for preparation of (3-(difluoro((perfluorohexyl)oxy)methyl)hex-5-en-1-yl)benzene (10)

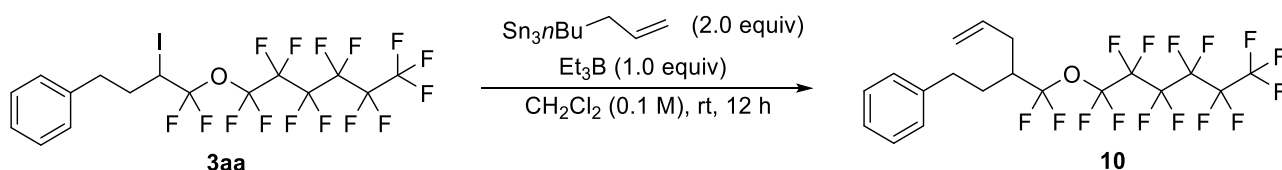

In a round bottom flask, (4,4-difluoro-3-iodo-4-((perfluorohexyl)oxy)butyl)benzene (**3aa**: 189.0 mg, 0.30 mmol, 1.0 equiv) was dissolved in CH<sub>2</sub>Cl<sub>2</sub> (0.1 M). Allyltributyltin (198.7 mg, 0.60 mmol, 2.0 equiv), and Triethylborane (29.4 mg, 0.30 mmol, 1.0 equiv.) were added to the solution. Then, the reaction mixture was stirred at rt for 12 h. After completion, the solution was quenched with KF (5%) aq., and extracted with Et<sub>2</sub>O. The organic layer was washed with brine, and dried over Na<sub>2</sub>SO<sub>4</sub>. The solvent was removed under reduced pressure. The crude product was purified by silica gel chromatography (Hexane) to obtain the compound **10** as colourless oil (126.5 mg, 0.232 mmol, 77% yield).

**HRMS** (FAB) *m/z*: [M]<sup>+</sup> calculated for C<sub>19</sub>H<sub>15</sub>F<sub>15</sub>O 544.0883; found: 544.0894. **<sup>1</sup>H NMR** (500 MHz, CDCl<sub>3</sub>) δ 7.31 – 7.28 (m, 2H), 7.22 – 7.19 (m, 1H), 7.18 – 7.15 (m, 2H), 5.77 – 5.69 (m, 1H), 5.15 – 5.10 (m, 2H), 2.75 – 2.65 (m, 2H), 2.46 – 2.40 (m, 1H), 2.27 – 2.13 (m, 2H), 1.96 – 1.88 (m, 1H), 1.82 – 1.74 (m, 1H). **<sup>13</sup>C NMR** (126 MHz, CDCl<sub>3</sub>) δ 141.1, 134.2, 128.7(2C), 128.5 (2C), 127.0 (t, *J* = 282.1 Hz), 126.3, 118.1, 116.1-108.2 (m), 43.5 (t, *J* = 21.8 Hz), 32.9, 32.3, 29.1. **<sup>19</sup>F NMR** (282 MHz, CDCl<sub>3</sub>) δ -72.2 to -72.4 (m, 2F), -80.8 (br, 3F), -83.3 (br, 2F), -122.3 (br, 2F), -122.9 (br, 2F), -125.7 (br, 2F), -126.2 (br, 2F). **IR** (KBr): 3929, 3450, 3032, 2937, 2324, 1645, 1244, 1206, 746, 701 cm<sup>-1</sup>.

### 8-5. Procedure for preparation of (E)-1-(3-(difluoro((perfluorohexyl)oxy)methyl)-5-phenylpent-1-en-1-yl)pyrrolidin-2-one (11)

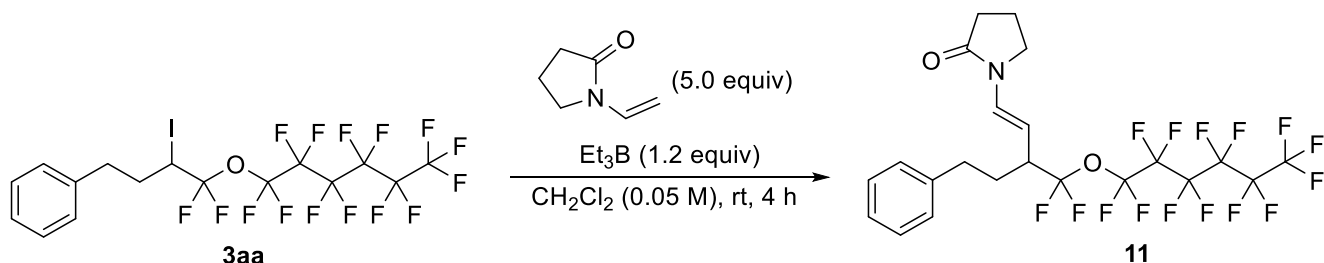

To a solution of (4,4-difluoro-3-iodo-4-((perfluorohexyl)oxy)butyl)benzene (**3aa**: 189.0 mg, 0.30 mmol) and 1-vinylpyrrolidin-2-one (166.7 mg, 1.50 mmol, 5.0 equiv) in  $\text{CH}_2\text{Cl}_2$  (0.05 M) was added Triethylborane (1.0 M in Hexane, 0.36 ml, 0.36 mmol, 1.2 equiv.) while the needle was immersed in the solution. The resulting solution was stirred open to air under  $\text{CaCl}_2$  guard tube for 4 h at rt. After completion, the solvent was removed under reduced pressure. The crude product was purified by silica gel chromatography (Hexane/Ethyl Acetate = 4.5:1) to obtain the compound **11** as white solid (105.7 mg, 0.173 mmol, 58% yield).

**Mp.** = 69.7 – 70.3 °C (Chloroform). **HRMS** (FAB)  $m/z$ :  $[\text{M} + \text{H}]^+$  calculated for  $\text{C}_{22}\text{H}_{19}\text{F}_{15}\text{NO}_2$  614.1176; found: 614.1186.  **$^1\text{H}$  NMR** (500 MHz,  $\text{CDCl}_3$ )  $\delta$ : 7.31 – 7.28 (m, 2H), 7.22 – 7.20 (m, 1H), 7.15 – 7.14 (m, 2H), 7.05 (d,  $J = 14.3$  Hz, 1H), 4.61 (dd,  $J = 14.3, 9.5$  Hz, 1H), 3.55 – 3.46 (m, 2H), 2.76 – 2.66 (m, 2H), 2.57 – 2.51 (m, 3H), 2.18 – 2.08 (m, 3H), 1.79 – 1.71 (m, 1H).  **$^{13}\text{C}$  NMR** (126 MHz,  $\text{CDCl}_3$ )  $\delta$ : 173.5, 140.7, 129.3, 128.7 (2C), 128.5 (2C), 126.4, 125.7 (t,  $J = 282.1$  Hz), 121.0 – 106.2 (m), 103.9, 47.0 (t,  $J = 24.6$  Hz), 45.1, 32.6, 31.2, 29.7, 17.5.  **$^{19}\text{F}$  NMR** (282 MHz,  $\text{CDCl}_3$ )  $\delta$  -74.3 to -74.5 (m, 2F), -81.2 (t-like,  $J = 9.9$  Hz, 3F), -83.8 (m, 2F), -122.8 (br, 2F), -123.3 to -123.4 (m, 2F), -126.2 (m, 2F), -126.5 to -126.6 (m, 2F). **IR (KBr)**: 3901, 3384, 2928, 2319, 1689, 1199, 1105, 954, 714, 422  $\text{cm}^{-1}$ .

#### 8-6. Procedure for preparation of (*E*)-(4,4-difluoro-4-((perfluorohexyl)oxy)but-2-en-1-yl)benzene (**12**)

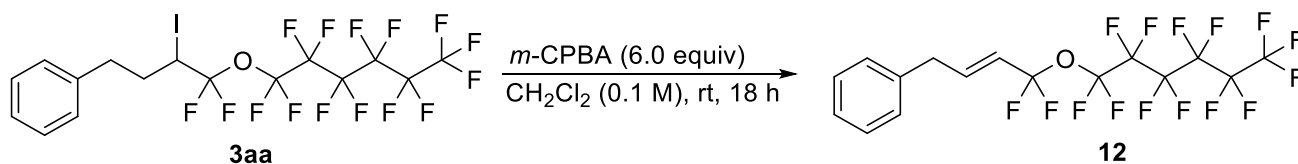

In a round bottom flask, (4,4-difluoro-3-iodo-4-((perfluorohexyl)oxy)butyl)benzene (**3aa**: 189.0 mg, 0.30 mmol, 1.0 equiv) was dissolved in  $\text{CH}_2\text{Cl}_2$  (0.1 M). The solution was cooled to 0 °C, then *m*-CPBA (3-Chloroperoxybenzoic Acid, 30% in water, 477.7 mg, 1.8 mmol, 6.0 equiv) was added to the reaction mixture. The reaction mixture was stirred at rt for 18 h. After completion, the solution was quenched with  $\text{NaHCO}_3$  aq., and extracted with  $\text{CH}_2\text{Cl}_2$  3 times. The organic layer was washed with brine, and dried over  $\text{Na}_2\text{SO}_4$ . The solvent was removed under reduced pressure. The crude product was purified by silica gel chromatography (Hexane/Ethyl Acetate = 98:2) to obtain the compound **12** as colourless oil (101.2 mg, 0.202 mmol, 67% yield).

**HRMS** (FAB)  $m/z$ :  $[\text{M}]^+$  calculated for  $\text{C}_{16}\text{H}_9\text{F}_{15}\text{O}$  502.0414; found: 502.0409.  **$^1\text{H}$  NMR** (500 MHz,  $\text{CDCl}_3$ )  $\delta$  7.37 – 7.32 (m, 2H), 7.28 – 7.25 (m, 1H), 7.18 (s, 2H), 6.59 – 6.53 (m, 1H), 5.66 – 5.59 (m, 1H), 3.51 – 3.49 (m, 2H).  **$^{13}\text{C}$  NMR** (126 MHz,  $\text{CDCl}_3$ )  $\delta$  139.8 (t,  $J = 7.3$  Hz), 137.2, 128.9 (2C), 128.9 (2C), 127.6, 127.0, 121.4 (t,  $J = 271.2$  Hz), 120.7 (t,  $J = 30.0$  Hz), 119.2 – 110.3 (m), 37.8.  **$^{19}\text{F}$  NMR** (282 MHz,  $\text{CDCl}_3$ )  $\delta$  -66.7 (m, 2F), -81.2 (t,  $J = 9.7$  Hz, 3F), -83.2 to -83.3 (m, 2F), -122.8 (br, 2F), -123.4 (br, 2F), -126.1 (br, 2F), -126.6 to -126.7 (m, 2F). **IR (KBr)**: 3733, 3033, 2310, 1683, 1245, 1204, 747, 701, 421  $\text{cm}^{-1}$ .



## 9. Computational details

Density functional theory (DFT) calculations were performed with the Gaussian 16 suite of computational programs. The geometries of all stationary points were optimized using the B3LYP-D3 functional at the basis set level of 6-311+G(d,p) and in diethyl ether as solvent using the polarizable continuum model (PCM). All geometry optimizations were performed without symmetry constraints. The geometries of optimized structures were represented using CYLview20, Build 0001.

### Cartesian coordinates and Gibbs free energies for all the calculated species.

#### [K][OCF<sub>3</sub>]

|                                              |                             |  |  |
|----------------------------------------------|-----------------------------|--|--|
| Zero-point correction=                       | 0.015774 (Hartree/Particle) |  |  |
| Thermal correction to Energy=                | 0.022190                    |  |  |
| Thermal correction to Enthalpy=              | 0.023134                    |  |  |
| Thermal correction to Gibbs Free Energy=     | -0.016561                   |  |  |
| Sum of electronic and zero-point Energies=   | -441.418168                 |  |  |
| Sum of electronic and thermal Energies=      | -441.411752                 |  |  |
| Sum of electronic and thermal Enthalpies=    | -441.410808                 |  |  |
| Sum of electronic and thermal Free Energies= | -441.450503                 |  |  |

|    |             |             |              |
|----|-------------|-------------|--------------|
| 6  | 2.837494000 | 4.312690000 | -5.455830000 |
| 9  | 3.531724000 | 5.264349000 | -4.701742000 |
| 9  | 3.928188000 | 3.348353000 | -5.768006000 |
| 8  | 2.232286000 | 4.700087000 | -6.449274000 |
| 19 | 3.380272000 | 3.501010000 | -8.456676000 |
| 9  | 2.120043000 | 3.598676000 | -4.490516000 |

#### [K][OC<sub>6</sub>F<sub>13</sub>]

|                                              |                             |  |  |
|----------------------------------------------|-----------------------------|--|--|
| Zero-point correction=                       | 0.075621 (Hartree/Particle) |  |  |
| Thermal correction to Energy=                | 0.096234                    |  |  |
| Thermal correction to Enthalpy=              | 0.097178                    |  |  |
| Thermal correction to Gibbs Free Energy=     | 0.024312                    |  |  |
| Sum of electronic and zero-point Energies=   | -1630.661650                |  |  |
| Sum of electronic and thermal Energies=      | -1630.641038                |  |  |
| Sum of electronic and thermal Enthalpies=    | -1630.640094                |  |  |
| Sum of electronic and thermal Free Energies= | -1630.712959                |  |  |

|   |             |             |              |
|---|-------------|-------------|--------------|
| 6 | 2.470658000 | 0.883309000 | -1.397616000 |
| 9 | 1.637527000 | 1.611399000 | -0.625731000 |
| 9 | 3.746254000 | 1.193561000 | -1.077350000 |
| 6 | 2.199929000 | 1.231383000 | -2.903060000 |
| 9 | 2.730980000 | 0.253682000 | -3.675406000 |
| 9 | 0.861393000 | 1.240673000 | -3.090254000 |

|    |             |              |              |
|----|-------------|--------------|--------------|
| 6  | 2.813755000 | 2.609659000  | -3.347191000 |
| 9  | 2.612553000 | 3.505069000  | -2.349725000 |
| 9  | 4.142133000 | 2.426395000  | -3.495292000 |
| 6  | 2.187118000 | 3.185700000  | -4.658691000 |
| 9  | 2.026355000 | 2.147531000  | -5.548783000 |
| 9  | 0.946278000 | 3.635825000  | -4.346039000 |
| 6  | 2.250968000 | -0.624953000 | -1.040039000 |
| 9  | 1.056104000 | -1.043667000 | -1.474098000 |
| 9  | 3.203176000 | -1.389102000 | -1.582236000 |
| 9  | 2.298544000 | -0.766591000 | 0.289544000  |
| 6  | 2.945345000 | 4.331021000  | -5.423925000 |
| 9  | 3.457670000 | 5.202899000  | -4.440051000 |
| 9  | 4.220051000 | 3.616756000  | -5.864356000 |
| 8  | 2.346963000 | 4.834795000  | -6.374987000 |
| 19 | 3.122132000 | 3.199223000  | -8.308977000 |

### G3

|                                              |                             |
|----------------------------------------------|-----------------------------|
| Zero-point correction=                       | 0.262855 (Hartree/Particle) |
| Thermal correction to Energy=                | 0.278625                    |
| Thermal correction to Enthalpy=              | 0.279569                    |
| Thermal correction to Gibbs Free Energy=     | 0.216905                    |
| Sum of electronic and zero-point Energies=   | -616.481189                 |
| Sum of electronic and thermal Energies=      | -616.465420                 |
| Sum of electronic and thermal Enthalpies=    | -616.464475                 |
| Sum of electronic and thermal Free Energies= | -616.527139                 |

|   |              |              |              |
|---|--------------|--------------|--------------|
| 1 | 2.900530000  | -1.574236000 | -3.127722000 |
| 6 | 3.276964000  | -0.688020000 | -2.613814000 |
| 1 | 3.927412000  | -1.004867000 | -1.786192000 |
| 1 | 3.872306000  | -0.091992000 | -3.320070000 |
| 8 | 2.151470000  | 0.036638000  | -2.142010000 |
| 6 | 2.513259000  | 1.220713000  | -1.448221000 |
| 1 | 3.137355000  | 0.985498000  | -0.573638000 |
| 1 | 3.085171000  | 1.896443000  | -2.100893000 |
| 6 | 1.232248000  | 1.899809000  | -0.999329000 |
| 1 | 0.660709000  | 1.225456000  | -0.345922000 |
| 1 | 0.608768000  | 2.136644000  | -1.873148000 |
| 8 | 1.595292000  | 3.084560000  | -0.304859000 |
| 6 | 0.475586000  | 3.817804000  | 0.169674000  |
| 1 | -0.173078000 | 4.121193000  | -0.664332000 |
| 1 | -0.122964000 | 3.209694000  | 0.862733000  |
| 6 | 1.004334000  | 5.047040000  | 0.886078000  |

|   |              |              |             |
|---|--------------|--------------|-------------|
| 1 | 1.653041000  | 4.743608000  | 1.720033000 |
| 1 | 1.602839000  | 5.655160000  | 0.192992000 |
| 8 | -0.115334000 | 5.780278000  | 1.360699000 |
| 6 | 0.247785000  | 6.965051000  | 2.055087000 |
| 1 | 0.871342000  | 6.728256000  | 2.928862000 |
| 1 | 0.819274000  | 7.639373000  | 1.401601000 |
| 6 | -1.033172000 | 7.644188000  | 2.504072000 |
| 1 | -1.605038000 | 6.968497000  | 3.156825000 |
| 1 | -1.657345000 | 7.879384000  | 1.629538000 |
| 8 | -0.671286000 | 8.828279000  | 3.197777000 |
| 6 | -1.796708000 | 9.552856000  | 3.669881000 |
| 1 | -2.391873000 | 8.956750000  | 4.376218000 |
| 1 | -2.447342000 | 9.869751000  | 2.842423000 |
| 1 | -1.420189000 | 10.439042000 | 4.183777000 |

**[KF][2G3]**

|                                              |                             |
|----------------------------------------------|-----------------------------|
| Zero-point correction=                       | 0.532057 (Hartree/Particle) |
| Thermal correction to Energy=                | 0.567023                    |
| Thermal correction to Enthalpy=              | 0.567967                    |
| Thermal correction to Gibbs Free Energy=     | 0.463822                    |
| Sum of electronic and zero-point Energies=   | -1361.325746                |
| Sum of electronic and thermal Energies=      | -1361.290780                |
| Sum of electronic and thermal Enthalpies=    | -1361.289836                |
| Sum of electronic and thermal Free Energies= | -1361.393980                |

|   |              |              |              |
|---|--------------|--------------|--------------|
| 1 | 1.703145000  | 0.160931000  | -1.908164000 |
| 6 | 1.980939000  | -0.660843000 | -1.250994000 |
| 1 | 2.974874000  | -1.022377000 | -1.541906000 |
| 1 | 2.017600000  | -0.314123000 | -0.207974000 |
| 8 | 0.999103000  | -1.677650000 | -1.417470000 |
| 6 | 1.286918000  | -2.852706000 | -0.676280000 |
| 1 | 2.311335000  | -3.191531000 | -0.882322000 |
| 1 | 1.203912000  | -2.658700000 | 0.404290000  |
| 6 | 0.308964000  | -3.938930000 | -1.058087000 |
| 1 | -0.722527000 | -3.597048000 | -0.897910000 |
| 1 | 0.481834000  | -4.813352000 | -0.413105000 |
| 8 | 0.510863000  | -4.278056000 | -2.423297000 |
| 6 | -0.294848000 | -5.361213000 | -2.873517000 |
| 1 | -0.060928000 | -6.274129000 | -2.304491000 |
| 1 | -1.360785000 | -5.132901000 | -2.729907000 |
| 6 | 0.008061000  | -5.588288000 | -4.341801000 |
| 1 | 1.090886000  | -5.665205000 | -4.476339000 |

|    |              |              |              |
|----|--------------|--------------|--------------|
| 1  | -0.441524000 | -6.534658000 | -4.668343000 |
| 8  | -0.436330000 | -4.505464000 | -5.152979000 |
| 6  | -1.724019000 | -4.701204000 | -5.738868000 |
| 1  | -1.663085000 | -5.480367000 | -6.512004000 |
| 1  | -2.451298000 | -5.023323000 | -4.980978000 |
| 6  | -2.188818000 | -3.409650000 | -6.367082000 |
| 1  | -3.044985000 | -3.623311000 | -7.025813000 |
| 1  | -1.382291000 | -2.966141000 | -6.965653000 |
| 8  | -2.578460000 | -2.507386000 | -5.335241000 |
| 6  | -2.971044000 | -1.234863000 | -5.850094000 |
| 1  | -3.842761000 | -1.334423000 | -6.513888000 |
| 1  | -2.142550000 | -0.771060000 | -6.397726000 |
| 1  | -3.234110000 | -0.615057000 | -4.993528000 |
| 19 | 0.208697000  | -1.782003000 | -4.269982000 |
| 1  | 2.873494000  | -4.009686000 | -3.197831000 |
| 6  | 3.668403000  | -3.363810000 | -3.570047000 |
| 1  | 4.279612000  | -3.018100000 | -2.723616000 |
| 1  | 4.314773000  | -3.935992000 | -4.251607000 |
| 8  | 3.047372000  | -2.279385000 | -4.238271000 |
| 6  | 3.976050000  | -1.323158000 | -4.737229000 |
| 1  | 4.562836000  | -0.900253000 | -3.907967000 |
| 1  | 4.673769000  | -1.802556000 | -5.440271000 |
| 6  | 3.229209000  | -0.228821000 | -5.461347000 |
| 1  | 2.556045000  | -0.664313000 | -6.211086000 |
| 1  | 3.956774000  | 0.419094000  | -5.974784000 |
| 8  | 2.478129000  | 0.524930000  | -4.511892000 |
| 6  | 1.561141000  | 1.429192000  | -5.125762000 |
| 1  | 2.102958000  | 2.233479000  | -5.648176000 |
| 1  | 0.940371000  | 0.887861000  | -5.851077000 |
| 6  | 0.693298000  | 2.044844000  | -4.054110000 |
| 1  | 1.304048000  | 2.584335000  | -3.314694000 |
| 1  | 0.014222000  | 2.767001000  | -4.529645000 |
| 8  | -0.047265000 | 1.014770000  | -3.406740000 |
| 6  | -1.108823000 | 1.496816000  | -2.597931000 |
| 1  | -0.742228000 | 2.244731000  | -1.878291000 |
| 1  | -1.874722000 | 1.973370000  | -3.226859000 |
| 6  | -1.712036000 | 0.344216000  | -1.828006000 |
| 1  | -2.520333000 | 0.734285000  | -1.190583000 |
| 1  | -0.953407000 | -0.124607000 | -1.187942000 |
| 8  | -2.218898000 | -0.610997000 | -2.750849000 |
| 6  | -2.951381000 | -1.656301000 | -2.132175000 |
| 1  | -3.871737000 | -1.276061000 | -1.665275000 |

|   |              |              |              |
|---|--------------|--------------|--------------|
| 1 | -2.356326000 | -2.163393000 | -1.360923000 |
| 1 | -3.209794000 | -2.368289000 | -2.916581000 |
| 9 | 0.229134000  | -1.056195000 | -6.767429000 |

**[K][2G3]**

|                                              |                             |
|----------------------------------------------|-----------------------------|
| Zero-point correction=                       | 0.532035 (Hartree/Particle) |
| Thermal correction to Energy=                | 0.564718                    |
| Thermal correction to Enthalpy=              | 0.565662                    |
| Thermal correction to Gibbs Free Energy=     | 0.467889                    |
| Sum of electronic and zero-point Energies=   | -1261.294931                |
| Sum of electronic and thermal Energies=      | -1261.262248                |
| Sum of electronic and thermal Enthalpies=    | -1261.261303                |
| Sum of electronic and thermal Free Energies= | -1261.359077                |

|   |              |              |              |
|---|--------------|--------------|--------------|
| 1 | 1.440925000  | 0.285101000  | -1.478250000 |
| 6 | 1.796299000  | -0.573810000 | -0.909235000 |
| 1 | 2.833397000  | -0.786511000 | -1.198042000 |
| 1 | 1.765891000  | -0.341846000 | 0.163456000  |
| 8 | 0.938552000  | -1.668181000 | -1.221481000 |
| 6 | 1.325464000  | -2.879872000 | -0.580172000 |
| 1 | 2.358292000  | -3.137150000 | -0.851735000 |
| 1 | 1.274578000  | -2.767779000 | 0.512154000  |
| 6 | 0.393523000  | -3.991579000 | -1.002391000 |
| 1 | -0.647389000 | -3.727184000 | -0.770085000 |
| 1 | 0.651242000  | -4.898959000 | -0.438722000 |
| 8 | 0.544520000  | -4.216170000 | -2.402538000 |
| 6 | -0.168090000 | -5.353407000 | -2.884637000 |
| 1 | 0.176960000  | -6.263848000 | -2.373648000 |
| 1 | -1.242802000 | -5.242611000 | -2.685407000 |
| 6 | 0.104879000  | -5.494141000 | -4.371442000 |
| 1 | 1.184104000  | -5.501400000 | -4.540789000 |
| 1 | -0.303373000 | -6.449503000 | -4.725695000 |
| 8 | -0.410509000 | -4.409987000 | -5.145738000 |
| 6 | -1.785692000 | -4.550894000 | -5.502829000 |
| 1 | -1.923120000 | -5.443265000 | -6.129018000 |
| 1 | -2.413970000 | -4.656699000 | -4.609078000 |
| 6 | -2.219783000 | -3.330055000 | -6.277421000 |
| 1 | -3.245864000 | -3.488077000 | -6.638972000 |
| 1 | -1.568616000 | -3.179505000 | -7.150218000 |
| 8 | -2.165679000 | -2.199266000 | -5.414869000 |
| 6 | -2.712236000 | -1.017873000 | -5.991855000 |
| 1 | -3.763472000 | -1.166294000 | -6.272557000 |

|    |              |              |              |
|----|--------------|--------------|--------------|
| 1  | -2.150244000 | -0.711221000 | -6.884824000 |
| 1  | -2.653457000 | -0.241417000 | -5.230211000 |
| 19 | 0.226679000  | -1.797976000 | -3.935832000 |
| 1  | 2.836864000  | -4.131162000 | -3.447133000 |
| 6  | 3.609639000  | -3.457910000 | -3.815591000 |
| 1  | 4.188012000  | -3.077774000 | -2.962853000 |
| 1  | 4.288263000  | -4.004166000 | -4.484399000 |
| 8  | 2.954635000  | -2.397636000 | -4.504007000 |
| 6  | 3.857191000  | -1.385380000 | -4.939647000 |
| 1  | 4.413990000  | -0.983626000 | -4.081634000 |
| 1  | 4.581069000  | -1.798758000 | -5.656314000 |
| 6  | 3.082718000  | -0.274285000 | -5.606960000 |
| 1  | 2.480742000  | -0.674190000 | -6.436354000 |
| 1  | 3.791528000  | 0.455149000  | -6.023446000 |
| 8  | 2.244219000  | 0.341380000  | -4.634125000 |
| 6  | 1.451425000  | 1.404244000  | -5.149827000 |
| 1  | 2.085835000  | 2.187269000  | -5.589297000 |
| 1  | 0.778183000  | 1.032075000  | -5.936691000 |
| 6  | 0.646343000  | 2.002055000  | -4.018903000 |
| 1  | 1.314061000  | 2.427620000  | -3.257479000 |
| 1  | 0.025135000  | 2.812790000  | -4.423657000 |
| 8  | -0.165555000 | 0.985865000  | -3.438623000 |
| 6  | -1.205032000 | 1.489842000  | -2.603143000 |
| 1  | -0.806199000 | 2.219873000  | -1.885111000 |
| 1  | -1.963721000 | 1.992290000  | -3.218554000 |
| 6  | -1.824431000 | 0.345028000  | -1.833538000 |
| 1  | -2.647291000 | 0.740426000  | -1.220123000 |
| 1  | -1.084669000 | -0.116048000 | -1.166167000 |
| 8  | -2.305866000 | -0.620185000 | -2.761851000 |
| 6  | -3.005576000 | -1.692779000 | -2.147026000 |
| 1  | -3.905112000 | -1.336699000 | -1.626459000 |
| 1  | -2.371559000 | -2.225428000 | -1.424541000 |
| 1  | -3.298073000 | -2.375049000 | -2.945640000 |

### FCOC<sub>5</sub>F<sub>11</sub>

|                                            |                             |
|--------------------------------------------|-----------------------------|
| Zero-point correction=                     | 0.073470 (Hartree/Particle) |
| Thermal correction to Energy=              | 0.090907                    |
| Thermal correction to Enthalpy=            | 0.091851                    |
| Thermal correction to Gibbs Free Energy=   | 0.026954                    |
| Sum of electronic and zero-point Energies= | -1502.347983                |
| Sum of electronic and thermal Energies=    | -1502.330546                |
| Sum of electronic and thermal Enthalpies=  | -1502.329602                |

Sum of electronic and thermal Free Energies= -1502.394499

|   |             |              |              |
|---|-------------|--------------|--------------|
| 6 | 2.527371000 | 0.869273000  | -1.425501000 |
| 9 | 1.782457000 | 1.618518000  | -0.587940000 |
| 9 | 3.833616000 | 1.146028000  | -1.219226000 |
| 6 | 2.148400000 | 1.237423000  | -2.901557000 |
| 9 | 2.621744000 | 0.282954000  | -3.729927000 |
| 9 | 0.801833000 | 1.268302000  | -2.999660000 |
| 6 | 2.726887000 | 2.623826000  | -3.359820000 |
| 9 | 2.599226000 | 3.519737000  | -2.358292000 |
| 9 | 4.042038000 | 2.475008000  | -3.641319000 |
| 6 | 2.034668000 | 3.210735000  | -4.636371000 |
| 9 | 1.923534000 | 2.239135000  | -5.562937000 |
| 9 | 0.802174000 | 3.661390000  | -4.317228000 |
| 6 | 2.293307000 | -0.634390000 | -1.056551000 |
| 9 | 1.046816000 | -1.004277000 | -1.370737000 |
| 9 | 3.158279000 | -1.423867000 | -1.696949000 |
| 9 | 2.469437000 | -0.785106000 | 0.260222000  |
| 6 | 2.864875000 | 4.372196000  | -5.245653000 |
| 9 | 2.746870000 | 5.469172000  | -4.484876000 |
| 8 | 3.510171000 | 4.322531000  | -6.226610000 |

### [Na(G3)<sub>2</sub>][OC<sub>6</sub>F<sub>13</sub>]

Zero-point correction= 0.608191 (Hartree/Particle)

Thermal correction to Energy= 0.661357

Thermal correction to Enthalpy= 0.662301

Thermal correction to Gibbs Free Energy= 0.515588

Sum of electronic and zero-point Energies= -2997.671153

Sum of electronic and thermal Energies= -2997.617987

Sum of electronic and thermal Enthalpies= -2997.617043

Sum of electronic and thermal Free Energies= -2997.763757

|   |              |              |              |
|---|--------------|--------------|--------------|
| 1 | 1.376720000  | 0.499310000  | -2.074288000 |
| 6 | 1.577214000  | -0.277492000 | -1.342692000 |
| 1 | 2.641001000  | -0.538088000 | -1.397091000 |
| 1 | 1.347758000  | 0.084607000  | -0.329648000 |
| 8 | 0.759618000  | -1.390419000 | -1.681528000 |
| 6 | 0.992947000  | -2.502007000 | -0.833147000 |
| 1 | 2.056127000  | -2.776904000 | -0.854186000 |
| 1 | 0.725692000  | -2.258716000 | 0.207049000  |
| 6 | 0.156502000  | -3.672549000 | -1.289484000 |
| 1 | -0.911099000 | -3.421674000 | -1.259357000 |

|    |              |              |              |
|----|--------------|--------------|--------------|
| 1  | 0.328414000  | -4.513023000 | -0.600772000 |
| 8  | 0.545767000  | -4.023549000 | -2.609672000 |
| 6  | -0.008665000 | -5.249342000 | -3.068843000 |
| 1  | 0.226670000  | -6.064316000 | -2.367621000 |
| 1  | -1.102572000 | -5.172002000 | -3.143574000 |
| 6  | 0.612110000  | -5.557457000 | -4.417128000 |
| 1  | 1.701036000  | -5.541385000 | -4.325304000 |
| 1  | 0.313645000  | -6.564267000 | -4.738989000 |
| 8  | 0.271351000  | -4.585655000 | -5.397457000 |
| 6  | -0.926570000 | -4.891530000 | -6.108974000 |
| 1  | -0.759455000 | -5.760519000 | -6.761765000 |
| 1  | -1.743950000 | -5.133897000 | -5.416405000 |
| 6  | -1.310087000 | -3.701092000 | -6.948332000 |
| 1  | -2.107771000 | -3.993969000 | -7.648444000 |
| 1  | -0.443070000 | -3.369273000 | -7.523782000 |
| 8  | -1.760875000 | -2.666848000 | -6.085882000 |
| 6  | -2.176914000 | -1.498507000 | -6.783977000 |
| 1  | -2.972105000 | -1.733560000 | -7.506639000 |
| 1  | -1.341015000 | -1.028557000 | -7.309357000 |
| 1  | -2.559824000 | -0.808447000 | -6.033536000 |
| 11 | 0.640168000  | -1.785049000 | -4.512543000 |
| 1  | 2.876847000  | -4.070939000 | -2.913412000 |
| 6  | 3.748393000  | -3.446622000 | -3.093902000 |
| 1  | 4.195100000  | -3.169045000 | -2.128127000 |
| 1  | 4.496708000  | -4.007668000 | -3.672106000 |
| 8  | 3.306055000  | -2.301011000 | -3.806002000 |
| 6  | 4.343079000  | -1.337127000 | -3.959349000 |
| 1  | 4.619565000  | -0.927092000 | -2.976604000 |
| 1  | 5.237066000  | -1.806821000 | -4.395877000 |
| 6  | 3.883919000  | -0.237879000 | -4.881857000 |
| 1  | 3.559640000  | -0.666857000 | -5.833778000 |
| 1  | 4.728063000  | 0.441737000  | -5.076781000 |
| 8  | 2.809345000  | 0.464249000  | -4.266126000 |
| 6  | 2.187835000  | 1.403049000  | -5.136076000 |
| 1  | 2.867031000  | 2.239868000  | -5.360888000 |
| 1  | 1.912254000  | 0.922014000  | -6.076087000 |
| 6  | 0.949852000  | 1.939928000  | -4.460856000 |
| 1  | 1.209729000  | 2.505531000  | -3.553866000 |
| 1  | 0.441221000  | 2.621858000  | -5.156332000 |
| 8  | 0.103732000  | 0.847453000  | -4.114191000 |
| 6  | -1.202639000 | 1.249677000  | -3.722854000 |
| 1  | -1.161302000 | 2.154200000  | -3.099277000 |



|   |              |              |               |
|---|--------------|--------------|---------------|
| 1 | -1.802282000 | 1.475959000  | -4.615269000  |
| 6 | -1.844408000 | 0.145317000  | -2.914699000  |
| 1 | -2.876668000 | 0.443290000  | -2.678158000  |
| 1 | -1.298010000 | -0.013761000 | -1.977086000  |
| 8 | -1.831123000 | -1.052399000 | -3.679218000  |
| 6 | -2.696933000 | -2.049200000 | -3.161238000  |
| 1 | -3.749010000 | -1.744431000 | -3.257690000  |
| 1 | -2.490446000 | -2.250120000 | -2.102412000  |
| 1 | -2.534430000 | -2.948909000 | -3.751626000  |
| 8 | 1.213355000  | -1.444771000 | -6.806199000  |
| 6 | 1.460973000  | -0.919517000 | -7.889356000  |
| 6 | 1.296700000  | -1.810462000 | -9.180181000  |
| 6 | 1.959629000  | -1.316808000 | -10.508971000 |
| 6 | 1.401652000  | -2.030514000 | -11.795076000 |
| 6 | 2.334345000  | -1.885384000 | -13.047773000 |
| 6 | 1.644051000  | -2.235923000 | -14.408336000 |
| 9 | 2.576303000  | -2.271474000 | -15.369317000 |
| 9 | 1.050963000  | -3.434213000 | -14.343662000 |
| 9 | 0.733338000  | -1.316283000 | -14.737649000 |
| 9 | 2.783644000  | -0.613959000 | -13.140751000 |
| 9 | 3.392095000  | -2.712593000 | -12.908319000 |
| 9 | 1.242144000  | -3.352518000 | -11.555447000 |
| 9 | 0.193540000  | -1.502541000 | -12.100826000 |
| 9 | 3.294513000  | -1.549913000 | -10.455883000 |
| 9 | 1.760870000  | 0.009329000  | -10.672162000 |
| 9 | 1.812420000  | -3.042112000 | -8.915010000  |
| 9 | -0.039221000 | -1.976786000 | -9.428770000  |
| 9 | 0.679443000  | 0.273625000  | -8.190907000  |
| 9 | 2.820810000  | -0.382718000 | -8.030454000  |

**[K(G3)<sub>2</sub>][OC<sub>6</sub>F<sub>13</sub>]**

|                                              |                             |
|----------------------------------------------|-----------------------------|
| Zero-point correction=                       | 0.606854 (Hartree/Particle) |
| Thermal correction to Energy=                | 0.660589                    |
| Thermal correction to Enthalpy=              | 0.661533                    |
| Thermal correction to Gibbs Free Energy=     | 0.512199                    |
| Sum of electronic and zero-point Energies=   | -2863.713291                |
| Sum of electronic and thermal Energies=      | -2863.659556                |
| Sum of electronic and thermal Enthalpies=    | -2863.658612                |
| Sum of electronic and thermal Free Energies= | -2863.807946                |

|   |             |              |              |
|---|-------------|--------------|--------------|
| 1 | 1.372334000 | 0.353894000  | -1.969699000 |
| 6 | 1.525117000 | -0.405213000 | -1.205471000 |

|    |              |              |              |
|----|--------------|--------------|--------------|
| 1  | 2.579393000  | -0.707529000 | -1.219014000 |
| 1  | 1.281892000  | 0.002741000  | -0.213974000 |
| 8  | 0.675418000  | -1.500987000 | -1.529147000 |
| 6  | 0.838729000  | -2.601996000 | -0.647776000 |
| 1  | 1.898801000  | -2.882870000 | -0.584269000 |
| 1  | 0.494605000  | -2.340254000 | 0.364477000  |
| 6  | 0.033793000  | -3.776333000 | -1.152201000 |
| 1  | -1.024358000 | -3.500006000 | -1.255519000 |
| 1  | 0.102275000  | -4.591436000 | -0.416799000 |
| 8  | 0.562124000  | -4.190621000 | -2.405778000 |
| 6  | -0.028488000 | -5.381228000 | -2.915345000 |
| 1  | 0.132379000  | -6.216358000 | -2.216925000 |
| 1  | -1.112280000 | -5.247771000 | -3.041947000 |
| 6  | 0.633654000  | -5.701098000 | -4.241930000 |
| 1  | 1.719364000  | -5.688428000 | -4.113250000 |
| 1  | 0.341769000  | -6.709104000 | -4.564481000 |
| 8  | 0.328896000  | -4.738491000 | -5.246807000 |
| 6  | -0.829554000 | -5.055443000 | -6.019224000 |
| 1  | -0.629590000 | -5.939593000 | -6.641114000 |
| 1  | -1.684660000 | -5.278790000 | -5.366950000 |
| 6  | -1.166531000 | -3.887077000 | -6.912236000 |
| 1  | -1.921539000 | -4.206623000 | -7.646302000 |
| 1  | -0.271888000 | -3.558516000 | -7.452317000 |
| 8  | -1.676928000 | -2.826125000 | -6.111222000 |
| 6  | -2.076573000 | -1.694028000 | -6.882602000 |
| 1  | -2.869269000 | -1.966108000 | -7.594182000 |
| 1  | -1.231402000 | -1.269851000 | -7.432654000 |
| 1  | -2.455948000 | -0.953827000 | -6.178980000 |
| 19 | 0.654365000  | -1.897930000 | -4.438720000 |
| 1  | 3.014120000  | -3.961125000 | -2.648596000 |
| 6  | 3.865669000  | -3.305937000 | -2.828454000 |
| 1  | 4.220364000  | -2.905975000 | -1.867698000 |
| 1  | 4.682686000  | -3.881497000 | -3.286810000 |
| 8  | 3.422686000  | -2.268316000 | -3.688600000 |
| 6  | 4.422055000  | -1.282875000 | -3.927896000 |
| 1  | 4.709456000  | -0.802793000 | -2.980785000 |
| 1  | 5.319471000  | -1.747982000 | -4.362168000 |
| 6  | 3.892932000  | -0.252847000 | -4.895718000 |
| 1  | 3.539501000  | -0.741208000 | -5.810419000 |
| 1  | 4.708503000  | 0.434911000  | -5.166175000 |
| 8  | 2.827648000  | 0.459678000  | -4.271078000 |
| 6  | 2.167217000  | 1.363718000  | -5.151459000 |

|   |              |              |               |
|---|--------------|--------------|---------------|
| 1 | 2.852188000  | 2.160817000  | -5.478029000  |
| 1 | 1.809455000  | 0.835966000  | -6.040836000  |
| 6 | 1.001557000  | 1.987344000  | -4.422037000  |
| 1 | 1.348734000  | 2.555992000  | -3.546837000  |
| 1 | 0.495789000  | 2.683402000  | -5.105714000  |
| 8 | 0.110406000  | 0.957827000  | -4.003051000  |
| 6 | -1.146207000 | 1.445516000  | -3.552483000  |
| 1 | -1.008557000 | 2.272962000  | -2.840547000  |
| 1 | -1.729705000 | 1.820488000  | -4.405140000  |
| 6 | -1.894296000 | 0.335009000  | -2.851291000  |
| 1 | -2.858401000 | 0.732034000  | -2.499071000  |
| 1 | -1.322792000 | -0.021178000 | -1.984223000  |
| 8 | -2.098419000 | -0.735989000 | -3.764123000  |
| 6 | -2.931991000 | -1.761310000 | -3.245917000  |
| 1 | -3.953008000 | -1.393186000 | -3.070245000  |
| 1 | -2.538788000 | -2.158950000 | -2.300847000  |
| 1 | -2.956126000 | -2.555607000 | -3.992167000  |
| 8 | 1.401772000  | -1.550729000 | -7.028798000  |
| 6 | 1.601275000  | -0.979844000 | -8.097351000  |
| 6 | 1.439894000  | -1.845335000 | -9.403211000  |
| 6 | 1.972714000  | -1.262786000 | -10.754491000 |
| 6 | 1.389466000  | -1.980962000 | -12.026407000 |
| 6 | 2.225311000  | -1.727863000 | -13.329262000 |
| 6 | 1.479172000  | -2.094908000 | -14.655226000 |
| 9 | 2.345966000  | -2.020888000 | -15.673720000 |
| 9 | 0.994734000  | -3.341212000 | -14.596601000 |
| 9 | 0.474717000  | -1.247420000 | -14.893639000 |
| 9 | 2.568467000  | -0.423036000 | -13.408506000 |
| 9 | 3.350413000  | -2.472597000 | -13.282096000 |
| 9 | 1.347640000  | -3.317696000 | -11.821939000 |
| 9 | 0.126758000  | -1.541071000 | -12.237073000 |
| 9 | 3.322800000  | -1.390744000 | -10.790629000 |
| 9 | 1.665487000  | 0.048068000  | -10.862047000 |
| 9 | 2.078430000  | -3.032865000 | -9.209296000  |
| 9 | 0.110239000  | -2.126994000 | -9.568073000  |
| 9 | 0.755431000  | 0.184760000  | -8.342979000  |
| 9 | 2.929789000  | -0.375227000 | -8.248052000  |

**[Cs(G3)<sub>2</sub>][OC<sub>6</sub>F<sub>13</sub>]**

|                                 |                             |
|---------------------------------|-----------------------------|
| Zero-point correction=          | 0.605586 (Hartree/Particle) |
| Thermal correction to Energy=   | 0.659953                    |
| Thermal correction to Enthalpy= | 0.660897                    |

|                                              |              |
|----------------------------------------------|--------------|
| Thermal correction to Gibbs Free Energy=     | 0.506100     |
| Sum of electronic and zero-point Energies=   | -2855.548950 |
| Sum of electronic and thermal Energies=      | -2855.494583 |
| Sum of electronic and thermal Enthalpies=    | -2855.493639 |
| Sum of electronic and thermal Free Energies= | -2855.648436 |

|    |              |              |              |
|----|--------------|--------------|--------------|
| 1  | 1.753920000  | -0.159386000 | -1.992585000 |
| 6  | 2.119002000  | -1.118938000 | -1.629497000 |
| 1  | 3.083315000  | -1.325774000 | -2.108479000 |
| 1  | 2.257289000  | -1.079823000 | -0.539630000 |
| 8  | 1.149970000  | -2.100655000 | -1.986054000 |
| 6  | 1.540526000  | -3.418421000 | -1.628304000 |
| 1  | 2.536825000  | -3.644749000 | -2.031794000 |
| 1  | 1.586422000  | -3.518237000 | -0.533067000 |
| 6  | 0.539730000  | -4.414932000 | -2.164265000 |
| 1  | -0.477292000 | -4.127704000 | -1.861195000 |
| 1  | 0.759520000  | -5.399438000 | -1.725668000 |
| 8  | 0.633274000  | -4.478395000 | -3.583992000 |
| 6  | -0.193169000 | -5.492062000 | -4.149238000 |
| 1  | 0.116321000  | -6.480700000 | -3.777362000 |
| 1  | -1.241144000 | -5.336117000 | -3.856326000 |
| 6  | -0.049185000 | -5.469569000 | -5.660164000 |
| 1  | 1.012541000  | -5.433234000 | -5.918582000 |
| 1  | -0.467122000 | -6.396842000 | -6.074741000 |
| 8  | -0.653208000 | -4.333260000 | -6.272916000 |
| 6  | -2.038248000 | -4.497400000 | -6.572546000 |
| 1  | -2.166530000 | -5.301698000 | -7.311166000 |
| 1  | -2.607695000 | -4.764339000 | -5.672176000 |
| 6  | -2.584590000 | -3.212782000 | -7.149309000 |
| 1  | -3.585913000 | -3.408406000 | -7.561525000 |
| 1  | -1.940309000 | -2.865219000 | -7.967131000 |
| 8  | -2.659518000 | -2.231076000 | -6.121957000 |
| 6  | -3.136532000 | -0.970647000 | -6.588593000 |
| 1  | -4.152488000 | -1.060148000 | -6.997562000 |
| 1  | -2.475940000 | -0.551810000 | -7.357394000 |
| 1  | -3.153314000 | -0.298374000 | -5.729487000 |
| 55 | 0.329100000  | -1.516450000 | -5.027933000 |
| 1  | 3.338907000  | -3.788939000 | -4.446262000 |
| 6  | 4.117672000  | -3.029044000 | -4.525532000 |
| 1  | 4.640923000  | -2.950079000 | -3.562024000 |
| 1  | 4.843545000  | -3.337680000 | -5.291246000 |
| 8  | 3.484353000  | -1.810242000 | -4.876101000 |

|   |              |              |               |
|---|--------------|--------------|---------------|
| 6 | 4.387722000  | -0.714685000 | -4.965512000  |
| 1 | 4.866351000  | -0.539898000 | -3.990593000  |
| 1 | 5.177411000  | -0.931339000 | -5.700179000  |
| 6 | 3.645182000  | 0.524768000  | -5.407336000  |
| 1 | 3.114456000  | 0.329264000  | -6.347050000  |
| 1 | 4.376817000  | 1.325532000  | -5.594235000  |
| 8 | 2.732569000  | 0.914166000  | -4.386589000  |
| 6 | 1.901801000  | 2.007668000  | -4.770171000  |
| 1 | 2.512004000  | 2.898182000  | -4.985614000  |
| 1 | 1.333596000  | 1.756258000  | -5.674190000  |
| 6 | 0.962515000  | 2.335244000  | -3.632966000  |
| 1 | 1.531038000  | 2.604790000  | -2.730626000  |
| 1 | 0.354087000  | 3.202673000  | -3.926357000  |
| 8 | 0.131344000  | 1.211524000  | -3.360235000  |
| 6 | -0.928412000 | 1.497265000  | -2.457615000  |
| 1 | -0.542316000 | 1.999360000  | -1.557645000  |
| 1 | -1.660965000 | 2.164606000  | -2.933424000  |
| 6 | -1.595181000 | 0.210426000  | -2.029251000  |
| 1 | -2.347365000 | 0.447739000  | -1.261446000  |
| 1 | -0.853309000 | -0.469699000 | -1.588378000  |
| 8 | -2.214138000 | -0.407993000 | -3.152289000  |
| 6 | -2.919385000 | -1.592147000 | -2.805960000  |
| 1 | -3.759197000 | -1.372836000 | -2.131233000  |
| 1 | -2.260798000 | -2.322233000 | -2.314408000  |
| 1 | -3.298669000 | -2.024035000 | -3.732240000  |
| 8 | 0.228521000  | 0.497056000  | -7.432685000  |
| 6 | 0.665245000  | 0.327682000  | -8.568508000  |
| 6 | 1.253393000  | -1.101588000 | -8.876765000  |
| 6 | 2.050673000  | -1.338031000 | -10.199437000 |
| 6 | 2.217981000  | -2.857893000 | -10.569569000 |
| 6 | 3.362962000  | -3.129938000 | -11.607377000 |
| 6 | 3.285968000  | -4.535150000 | -12.294008000 |
| 9 | 4.410819000  | -4.741190000 | -12.990662000 |
| 9 | 3.168581000  | -5.504336000 | -11.377095000 |
| 9 | 2.250370000  | -4.603895000 | -13.134506000 |
| 9 | 3.329504000  | -2.199900000 | -12.586901000 |
| 9 | 4.554313000  | -3.053883000 | -10.975326000 |
| 9 | 2.498511000  | -3.576302000 | -9.457425000  |
| 9 | 1.052867000  | -3.312642000 | -11.087583000 |
| 9 | 3.292242000  | -0.805272000 | -10.069359000 |
| 9 | 1.436481000  | -0.738627000 | -11.241288000 |
| 9 | 2.098403000  | -1.435464000 | -7.854575000  |

|   |              |              |              |
|---|--------------|--------------|--------------|
| 9 | 0.221245000  | -1.999289000 | -8.845212000 |
| 9 | -0.286549000 | 0.556547000  | -9.643938000 |
| 9 | 1.748876000  | 1.232620000  | -8.970604000 |

## 10. References

1. Jiang, X.; Wang, G.; Zheng, Z.; Xiaohui, Y.; Hong, Y.; Xia, H.; Yu, C. Autocatalytic Synthesis of Thioesters via Thiocarbonylation of *gem*-Difluoroalkenes. *Org. Lett.* **2020**, *22*, 9762-9766.
2. Hu, J.; Han, X.; Yuan, Y.; Shi, Z. Stereoselective Synthesis of Z Fluoroalkenes through Copper-Catalyzed Hydrodefluorination of *gem*-Difluoroalkenes with Water. *Angew. Chem. Int. Ed.* **2017**, *56*, 13342-13346.
3. Ito, H.; Seo, T.; Kojima, R.; Kubota, K. Copper(I)-catalyzed Stereoselective Defluoroborylation of Aliphatic *Gem*-Difluoroalkenes. *Chem. Lett.* **2018**, *47*, 1330-1332.
4. Ross, S. P.; Rahman, A. A.; Sigman, M. S. Development and Mechanistic Interrogation of Interrupted Chain-Walking in the Enantioselective Relay Heck Reaction. *J. Am. Chem. Soc.* **2020**, *142*, 10516-10525.
5. Wu, Z.; Xu, X.; Wang, J.; Dong, G. Carbonyl 1,2-transposition through triflate-mediated  $\alpha$ -amination. *Science* **2021**, *374*, 734-740.
6. Kampmann, S. S.; Skelton, B. W.; Yeoh, G. C.; Abrahama, L. J.; Lengkeek, N. A.; Stubbs, K. A.; Heath, C. H.; Stewart, S. G. The synthesis and fluorescence profile of novel thalidomide analogues. *Tetrahedron.* **2015**, *71*, 8140-8149.

## 11. NMR data

$^1\text{H}$  NMR (500 MHz,  $\text{CDCl}_3$ ): **1b**

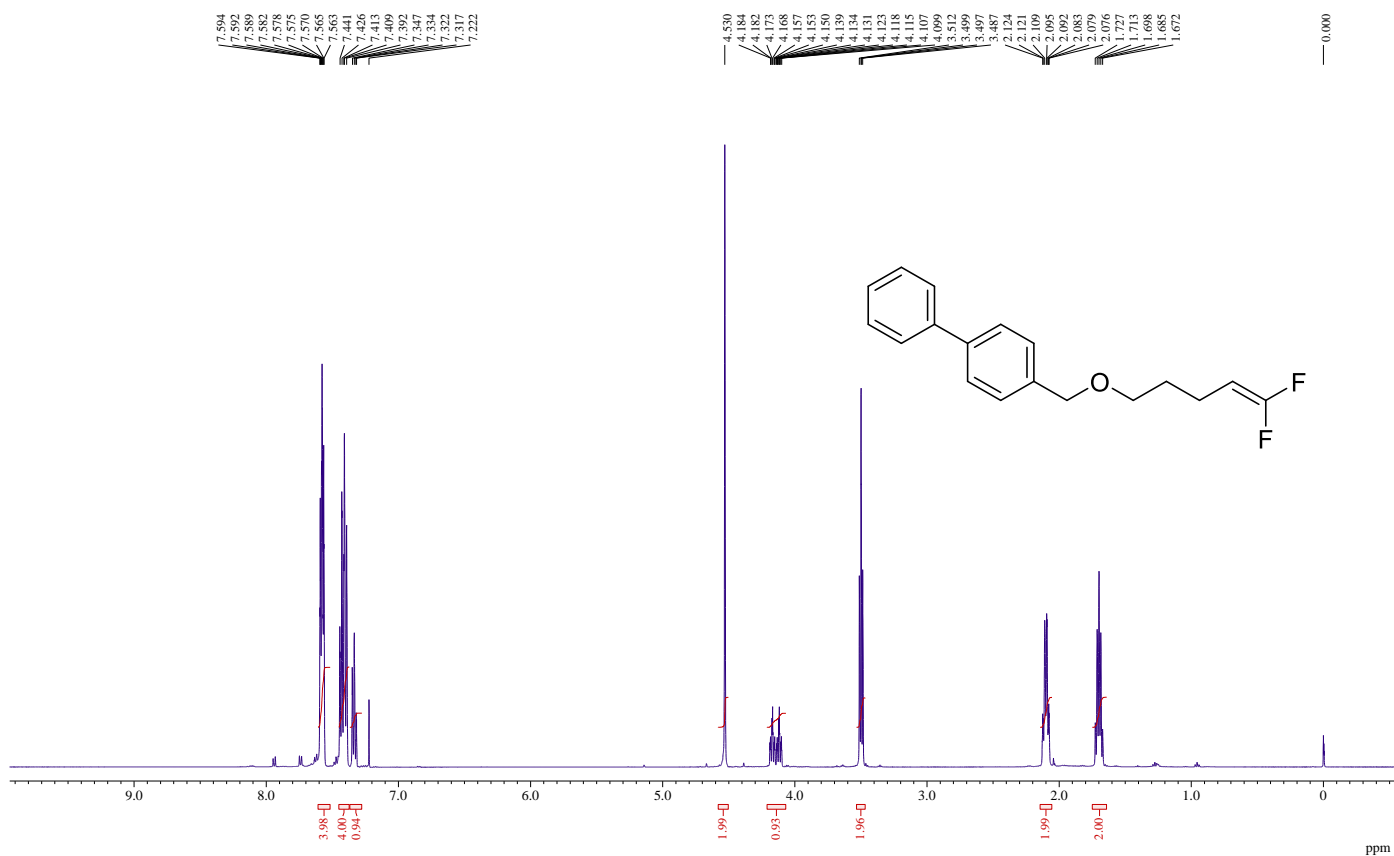

$^{13}\text{C}$  NMR (126 MHz,  $\text{CDCl}_3$ ): **1b**

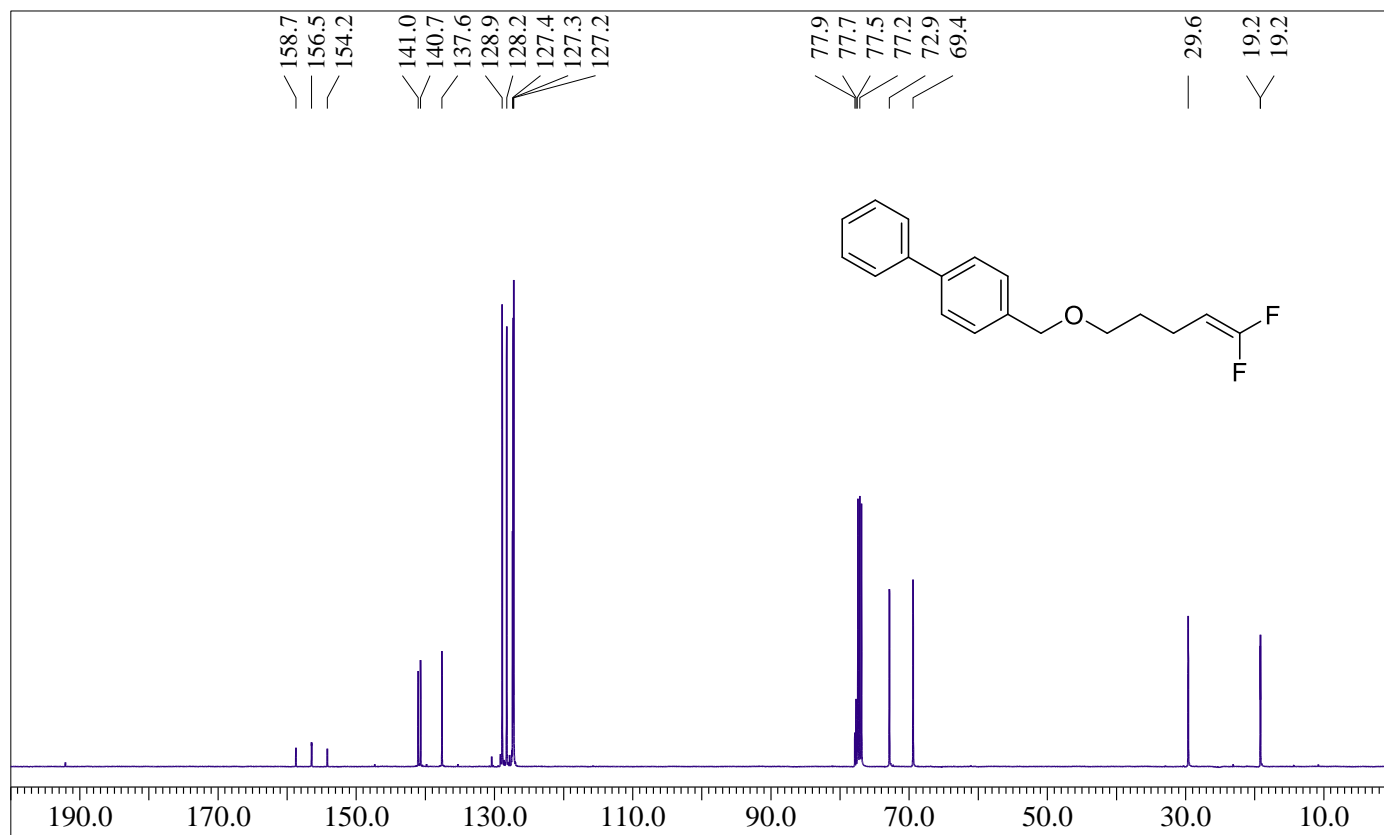

$^{19}\text{F}$  NMR (282 MHz,  $\text{CDCl}_3$ ): **1b**

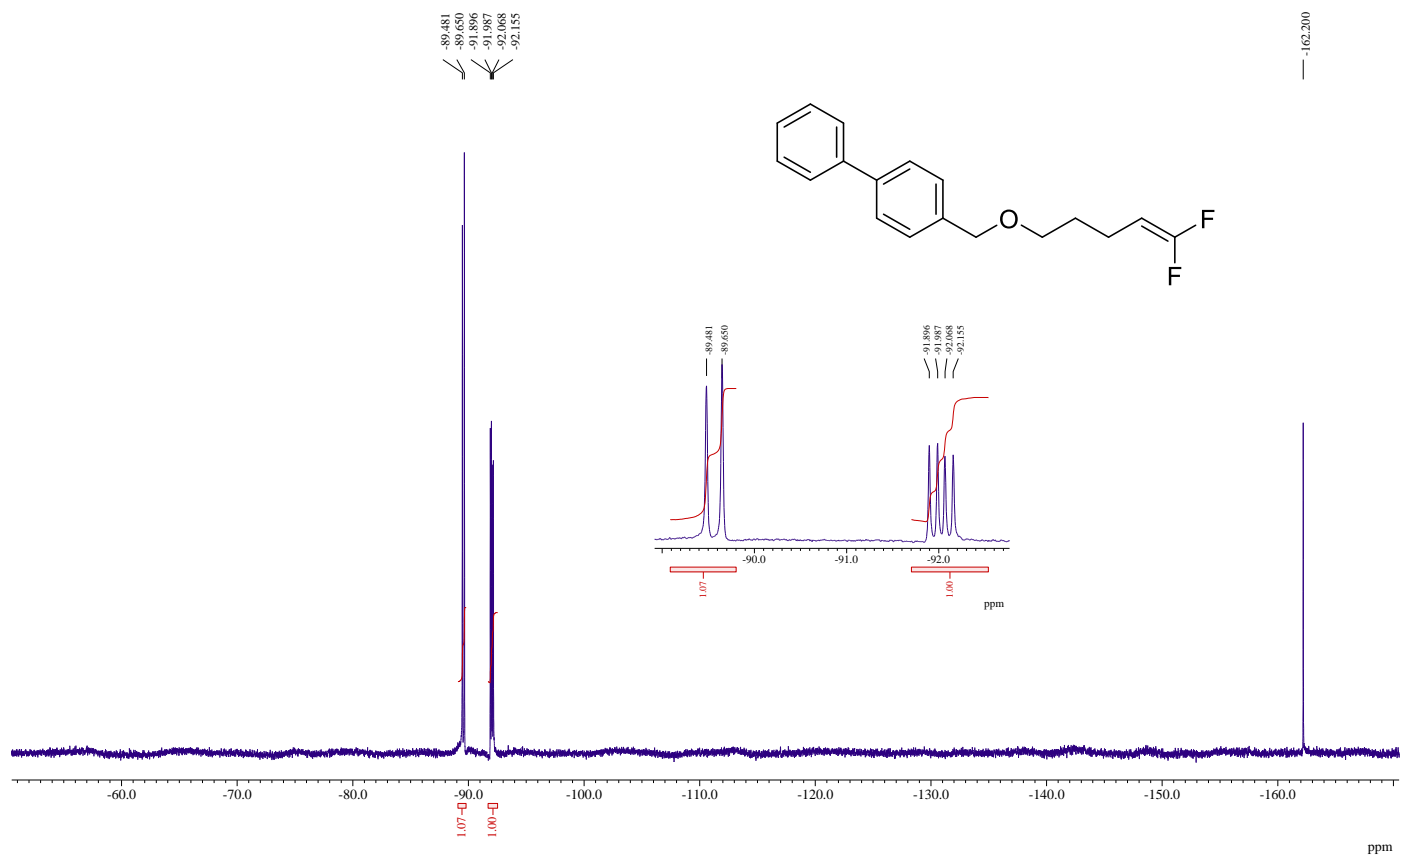

$^1\text{H}$  NMR (500 MHz,  $\text{CDCl}_3$ ): **1e**

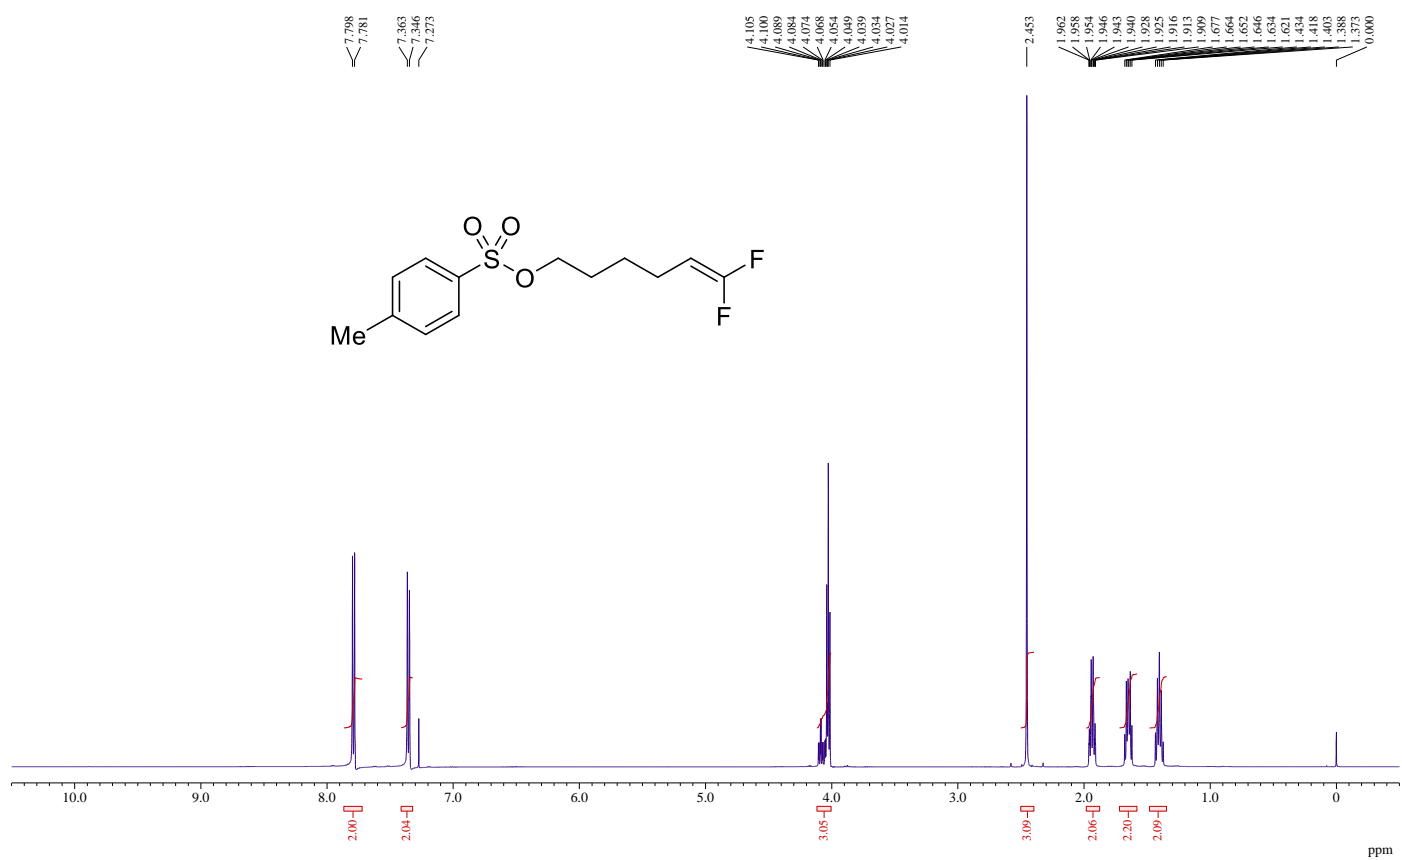



<sup>13</sup>C NMR (126 MHz, CDCl<sub>3</sub>): **1e**

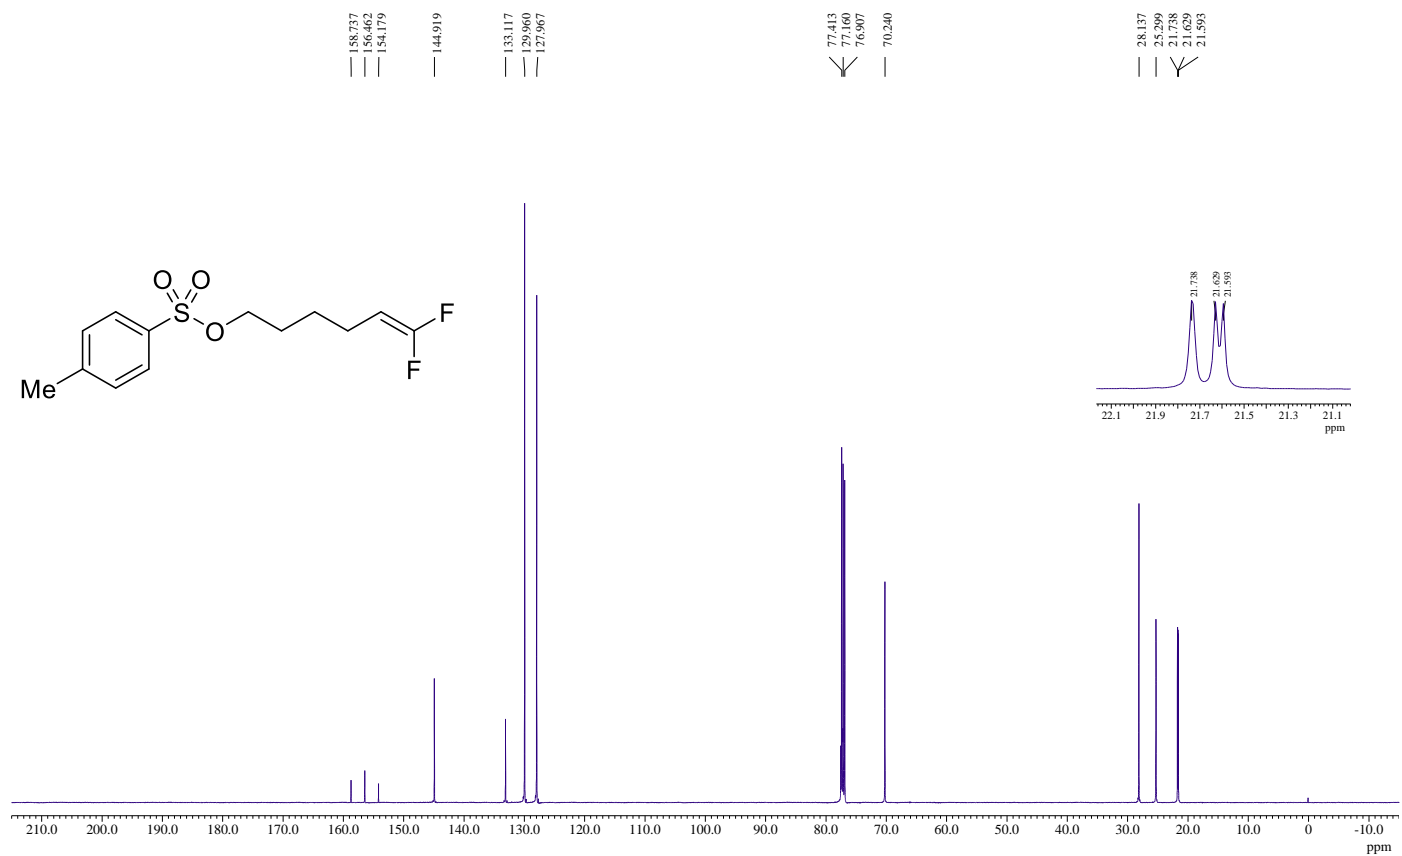

<sup>19</sup>F NMR (282 MHz, CDCl<sub>3</sub>): **1e**

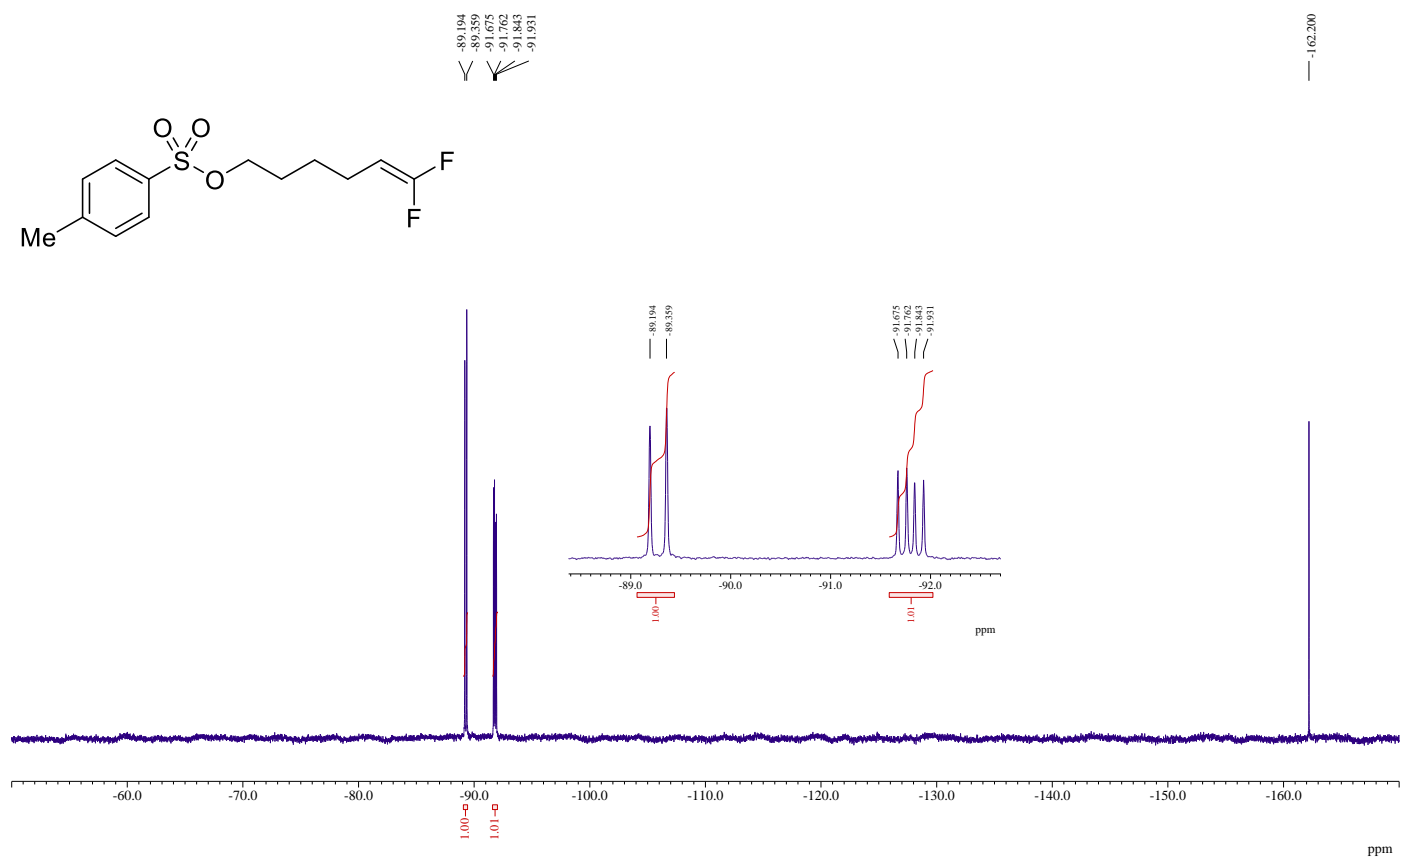

<sup>1</sup>H NMR (500 MHz, CDCl<sub>3</sub>): **1f**

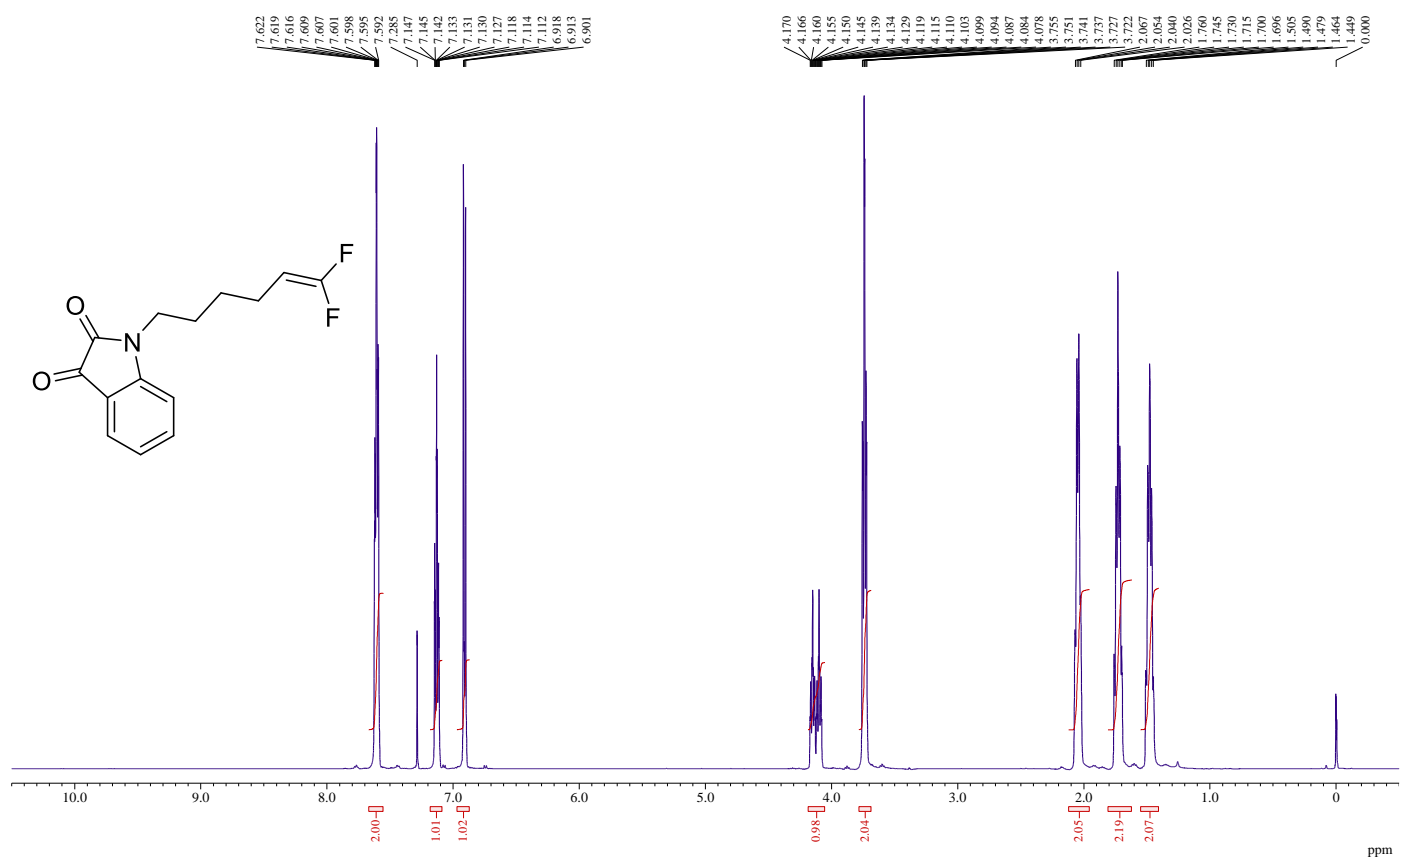

<sup>13</sup>C NMR (126 MHz, CDCl<sub>3</sub>): **1f**

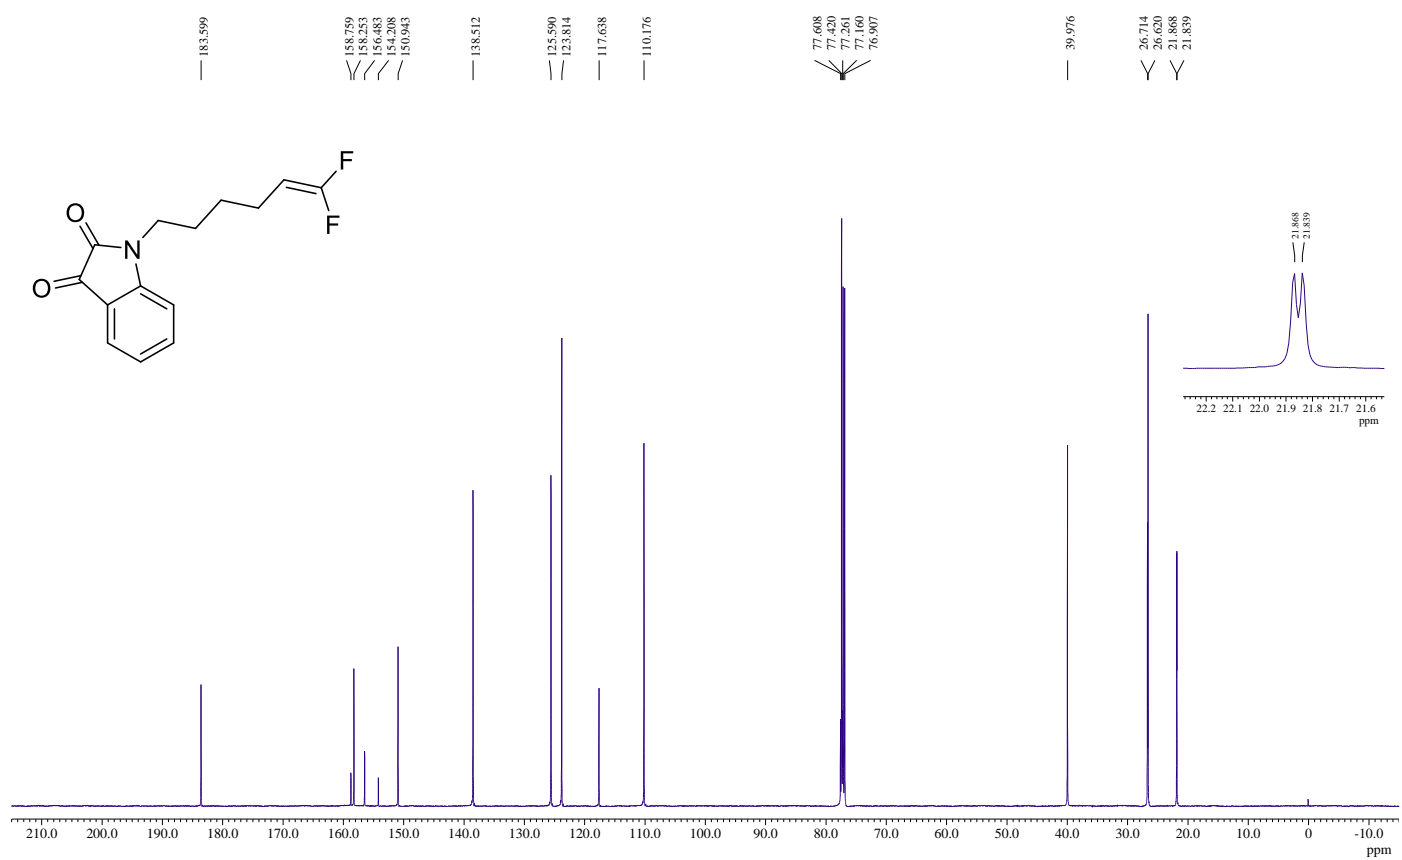

<sup>19</sup>F NMR (282 MHz, CDCl<sub>3</sub>): **1f**

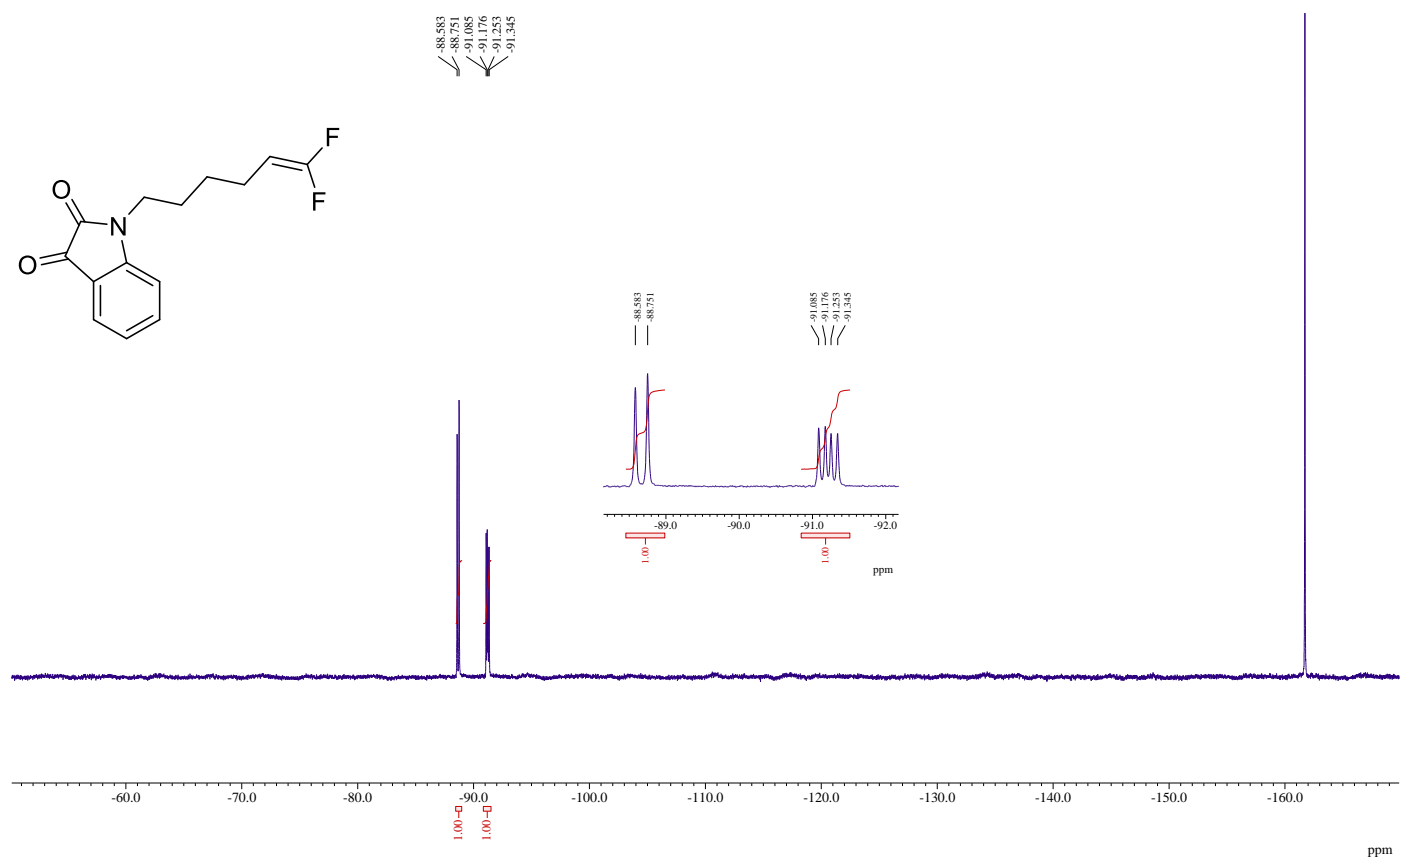

<sup>1</sup>H NMR (500 MHz, CDCl<sub>3</sub>): **1n**

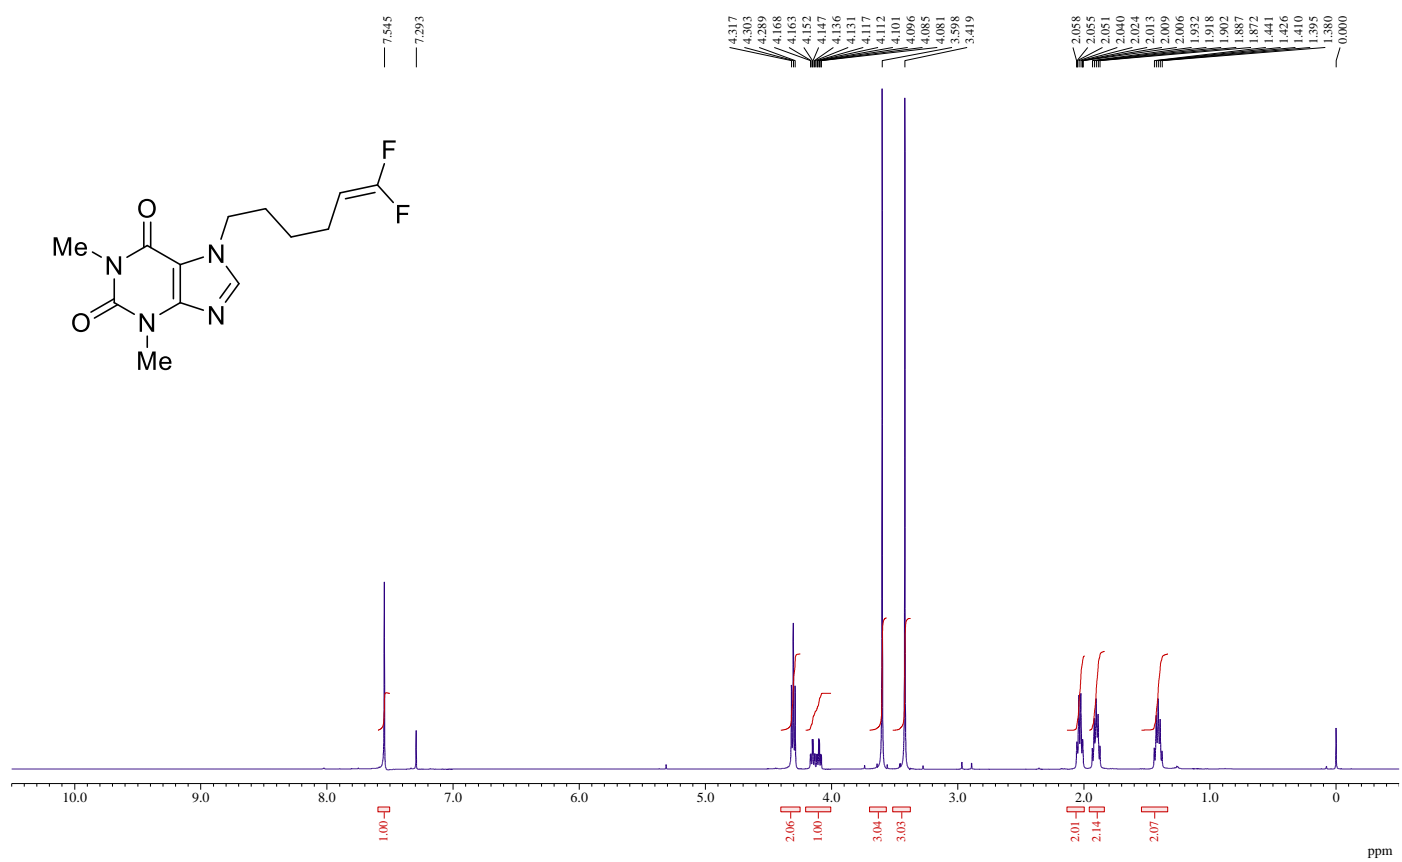

<sup>13</sup>C NMR (126 MHz, CDCl<sub>3</sub>): **1n**

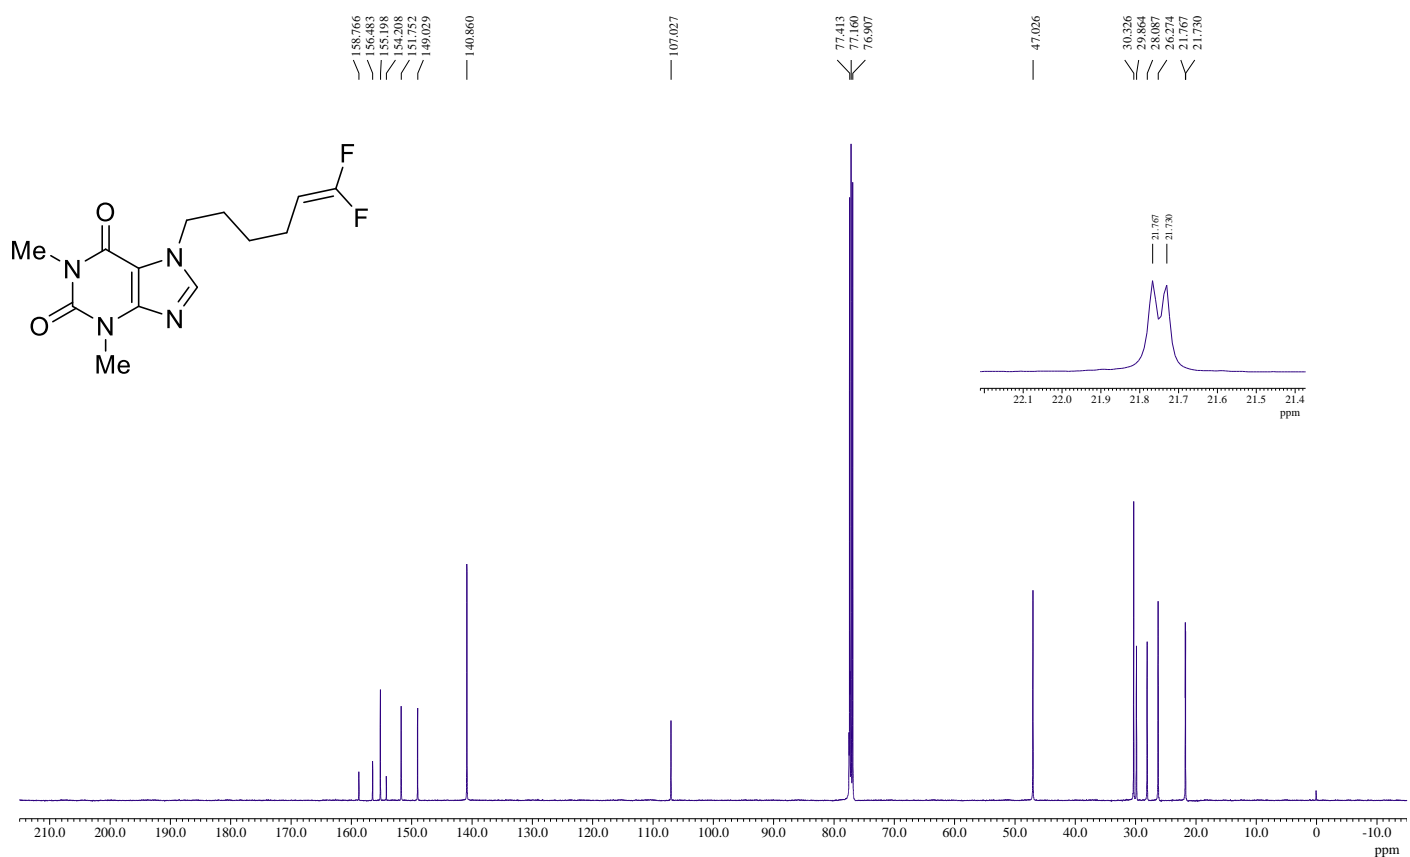

<sup>19</sup>F NMR (282 MHz, CDCl<sub>3</sub>): **1n**

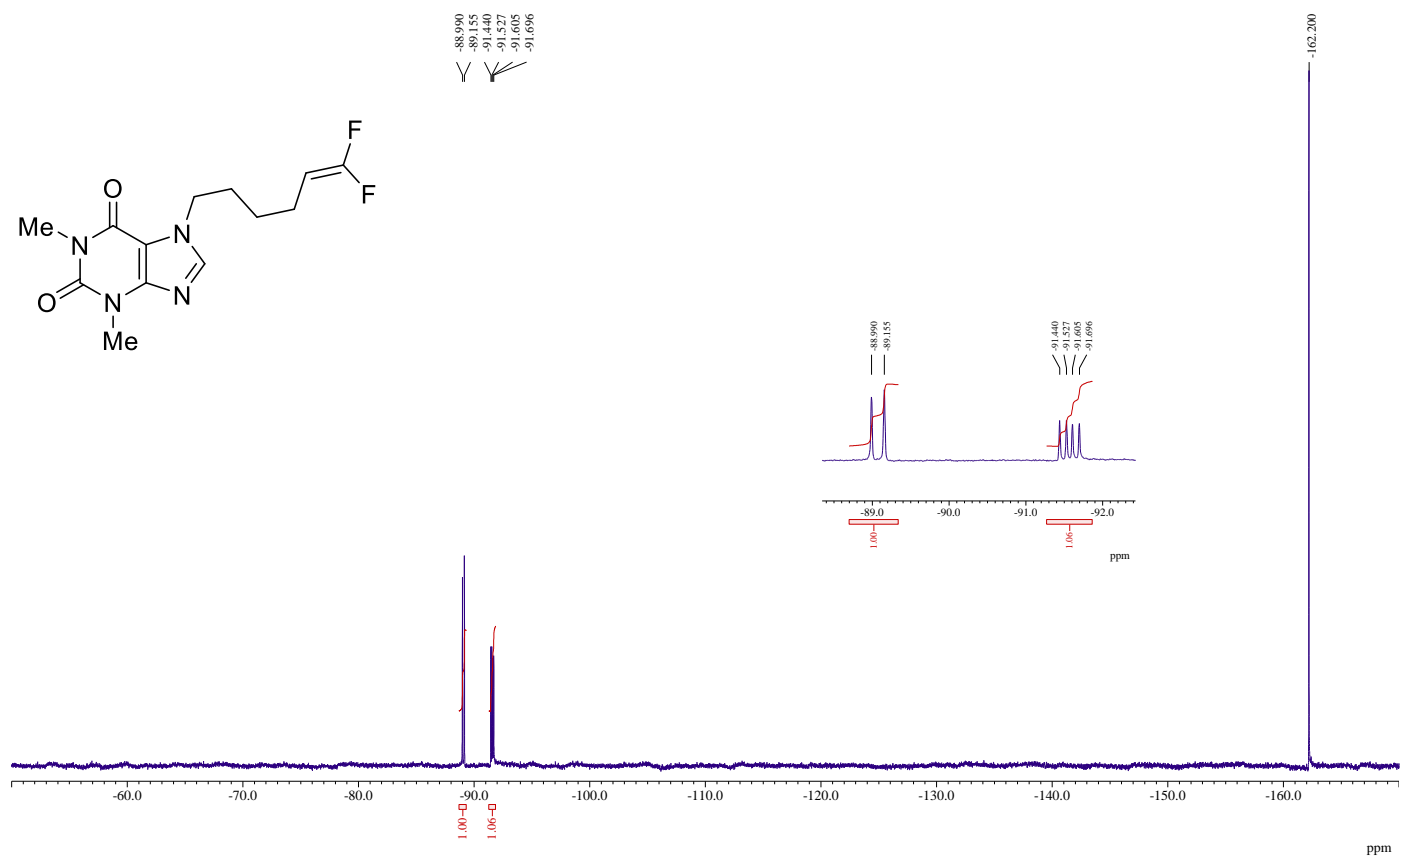



<sup>19</sup>F NMR (282 MHz, CDCl<sub>3</sub>): **1o**

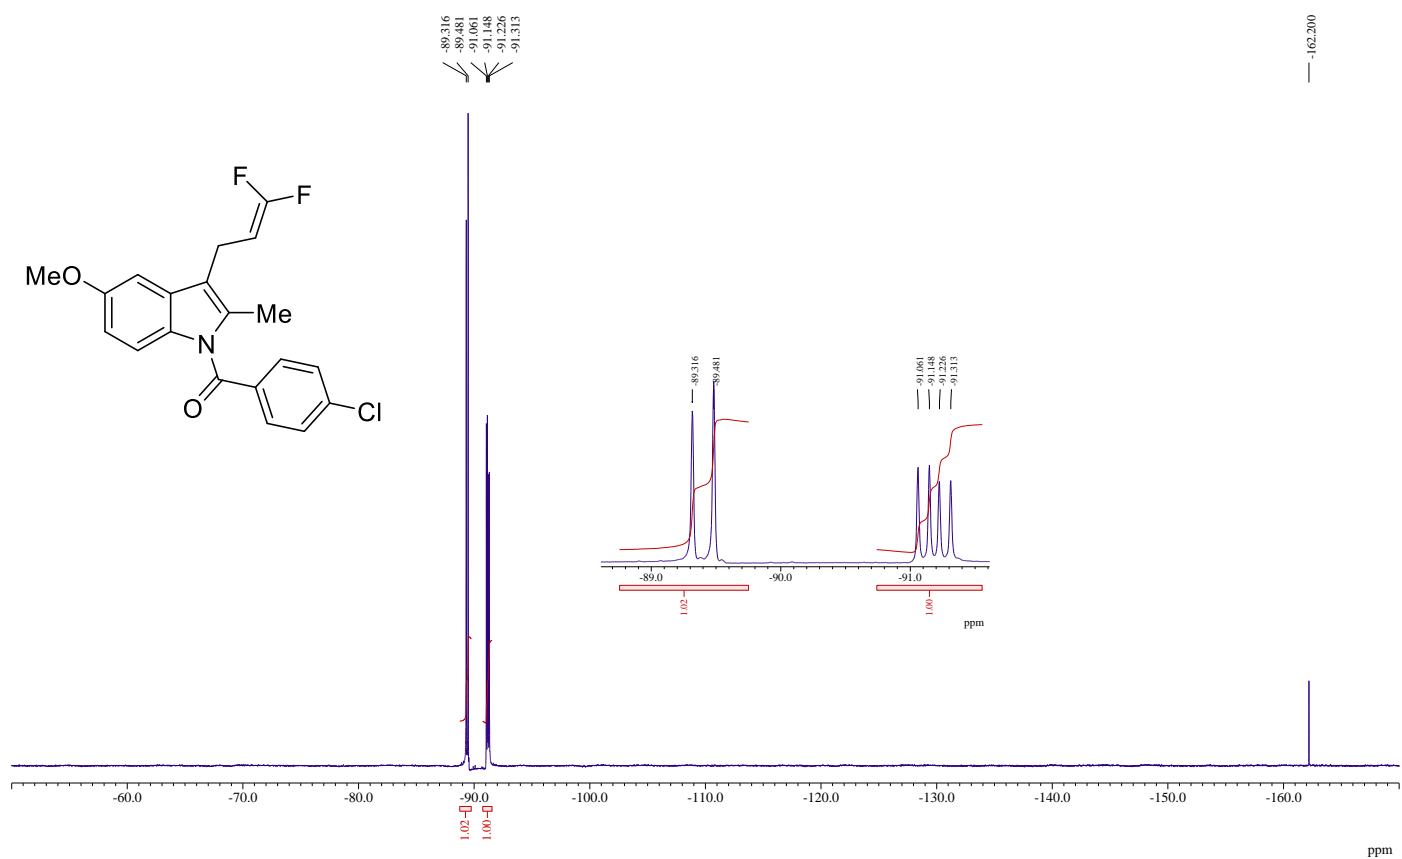

<sup>1</sup>H NMR (500 MHz, CDCl<sub>3</sub>): **1r**

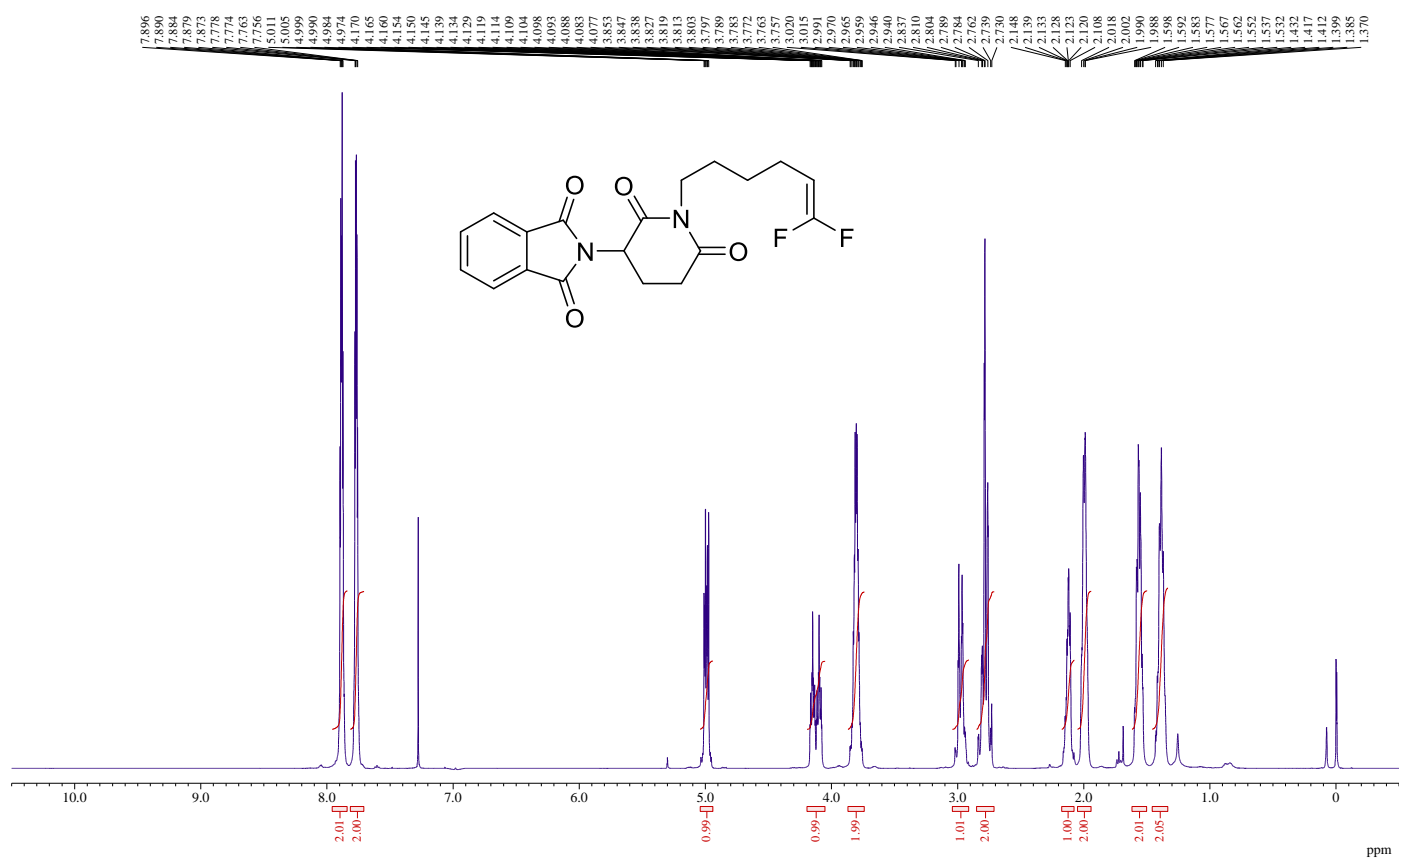

<sup>13</sup>C NMR (126 MHz, CDCl<sub>3</sub>): **1r**

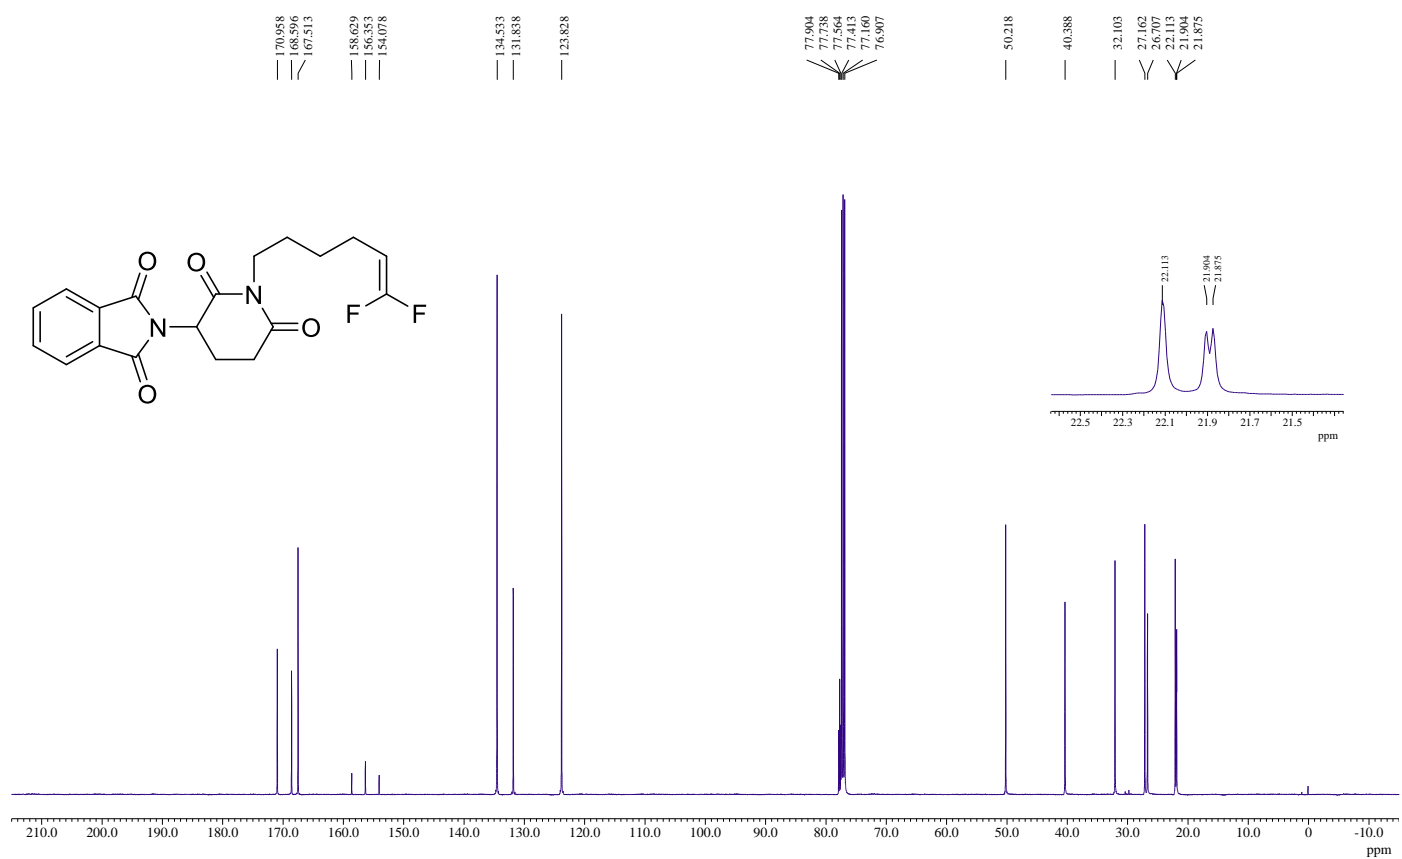

<sup>19</sup>F NMR (282 MHz, CDCl<sub>3</sub>): **1r**

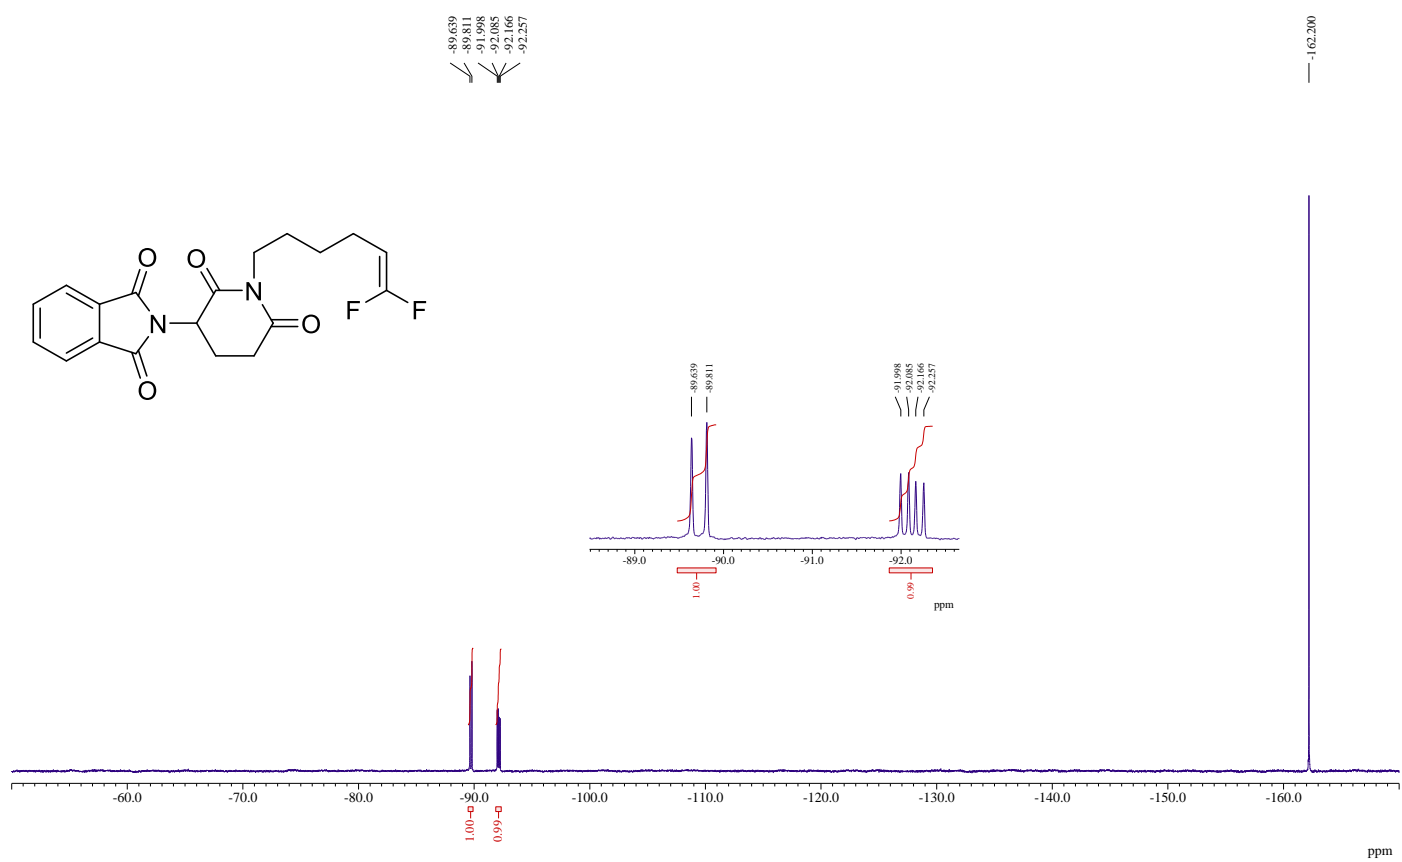

**<sup>1</sup>H NMR (500 MHz, CDCl<sub>3</sub>): 3aa**

7.335  
7.332  
7.331  
7.305  
7.264  
7.252  
7.249  
7.235  
7.216  
7.205  
7.174

4.044  
4.036  
4.027  
4.020  
4.015  
4.012  
4.004  
3.999  
3.990  
3.983  
3.019  
3.009  
3.005  
2.992  
2.982  
2.976  
2.966  
2.713  
2.696  
2.685  
2.680  
2.668  
2.611  
2.211  
2.003  
2.195  
2.193  
2.186  
2.181  
2.173  
2.166  
2.156  
2.149  
2.144  
2.139  
2.135  
2.128  
2.119  
2.110  
2.089  
0.000

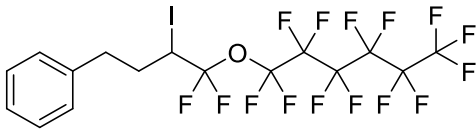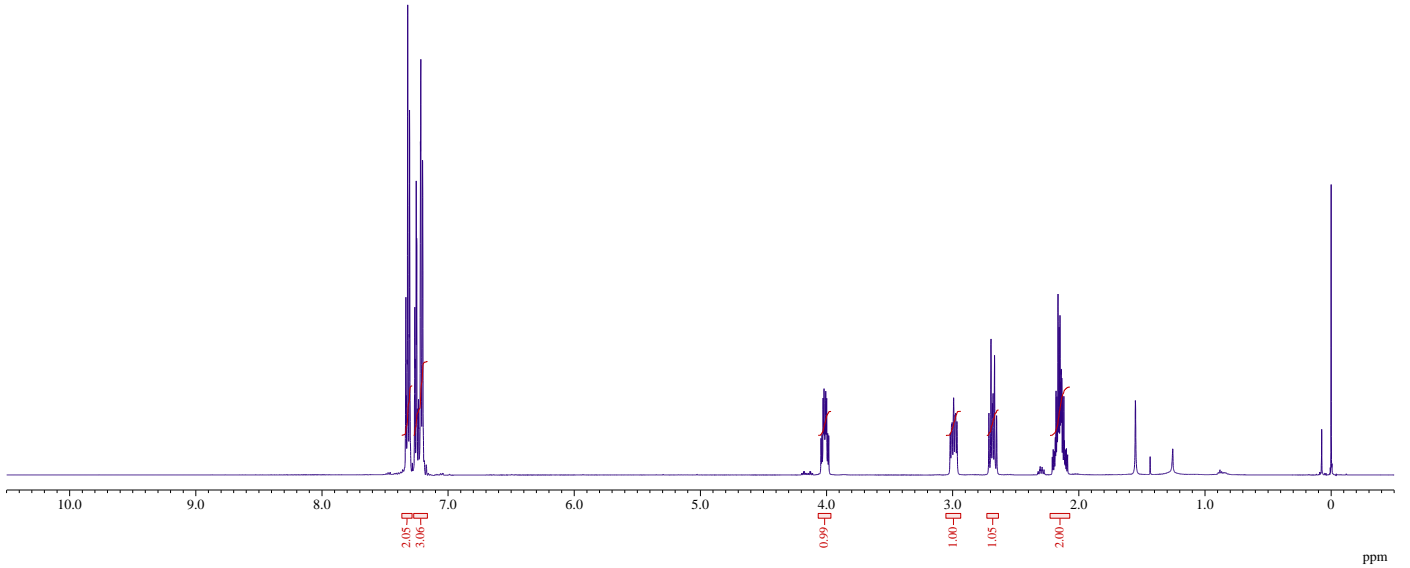

**<sup>13</sup>C NMR (126 MHz, CDCl<sub>3</sub>): 3aa**

139.162  
128.906  
128.617  
126.862  
125.417  
123.200  
120.882  
120.368  
118.649  
118.389  
118.129  
117.818  
117.573  
116.559  
116.352  
115.832  
115.529  
115.283  
114.062  
113.802  
113.492  
113.246  
112.971  
112.820  
112.560  
112.408  
111.245  
111.036  
110.920  
110.660  
109.994  
109.494  
109.191  
109.989  
109.743  
109.582  
108.833  
108.580  
108.248  
108.089  
107.778  
106.876  
106.681  
106.420  
106.168  
105.857  
77.413  
77.160  
76.907  
34.248  
34.443  
25.862  
25.638  
25.638  
25.421

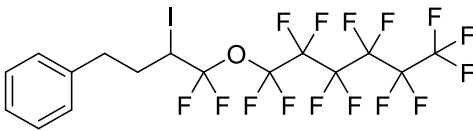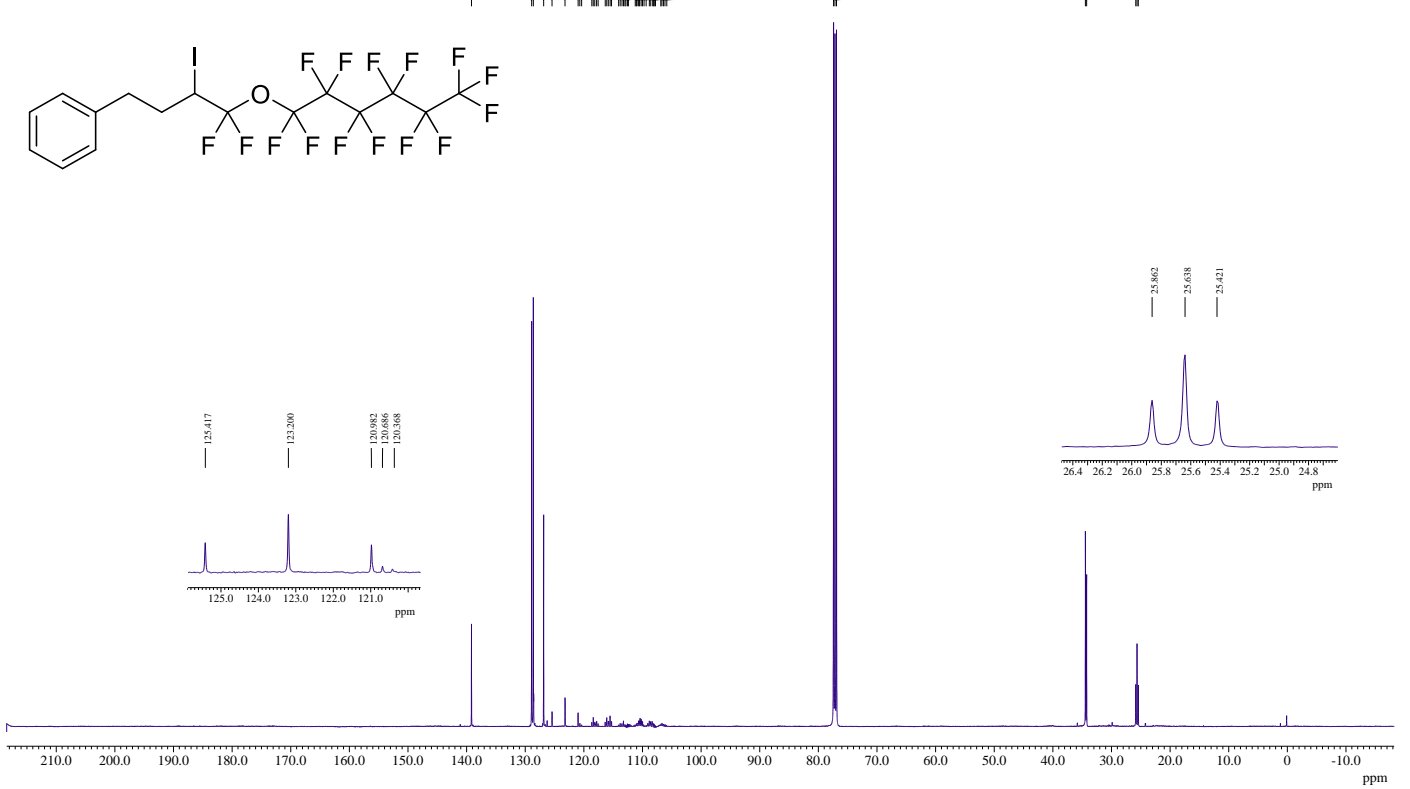



<sup>19</sup>F NMR (282 MHz, CDCl<sub>3</sub>): **3aa**

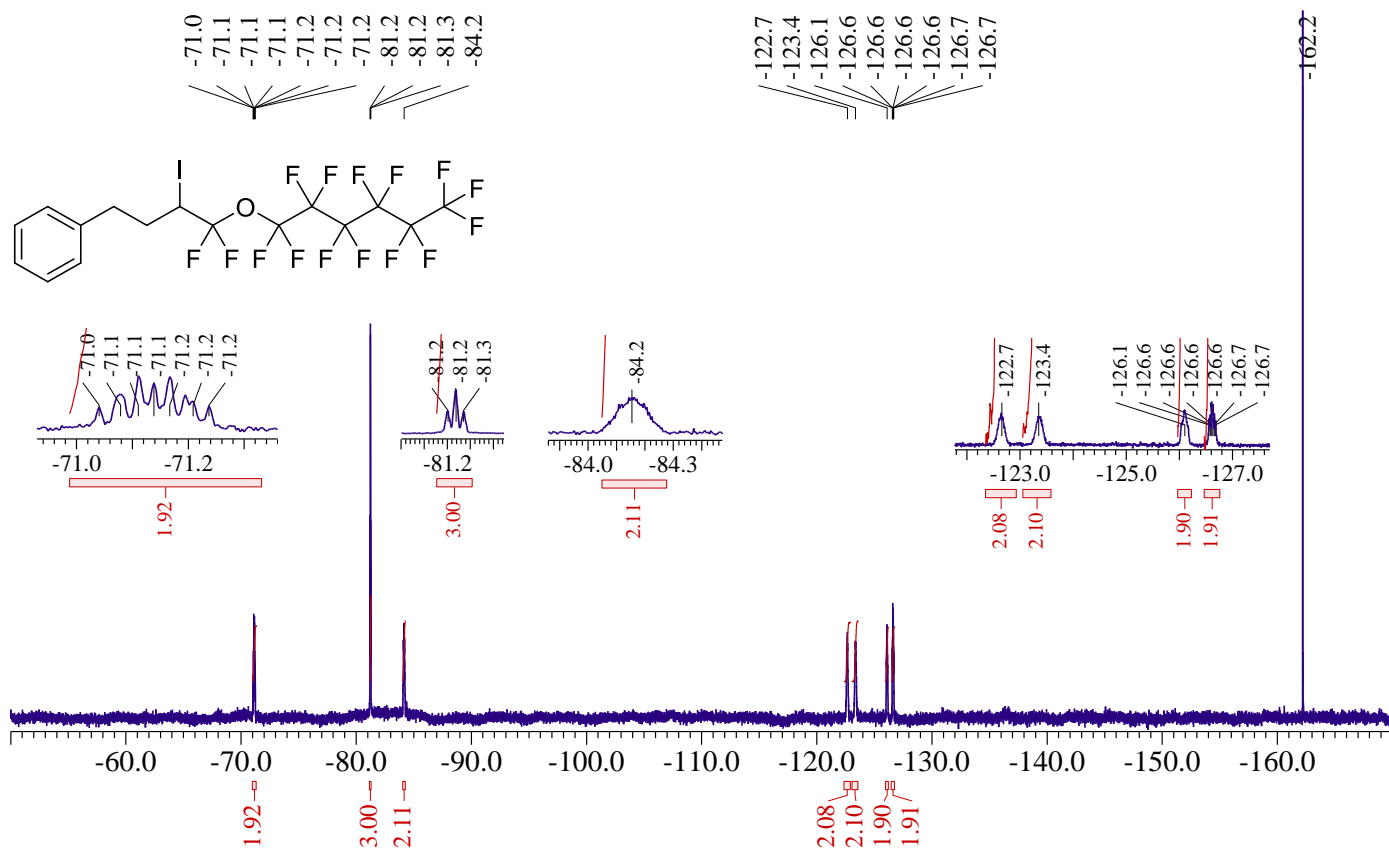

<sup>1</sup>H NMR (500 MHz, CDCl<sub>3</sub>): **3ba**

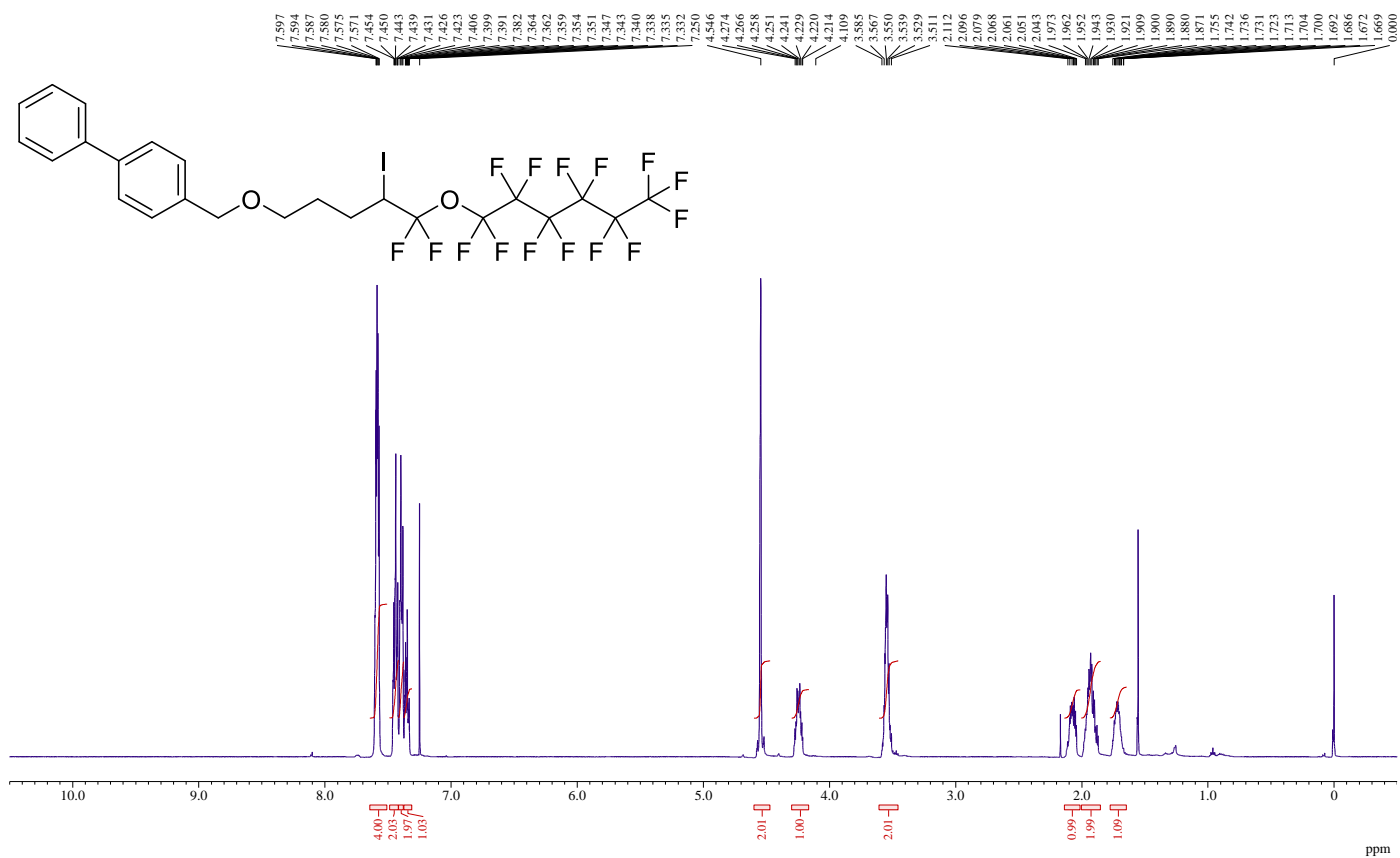

**<sup>13</sup>C NMR (126 MHz, CDCl<sub>3</sub>): 3ba**

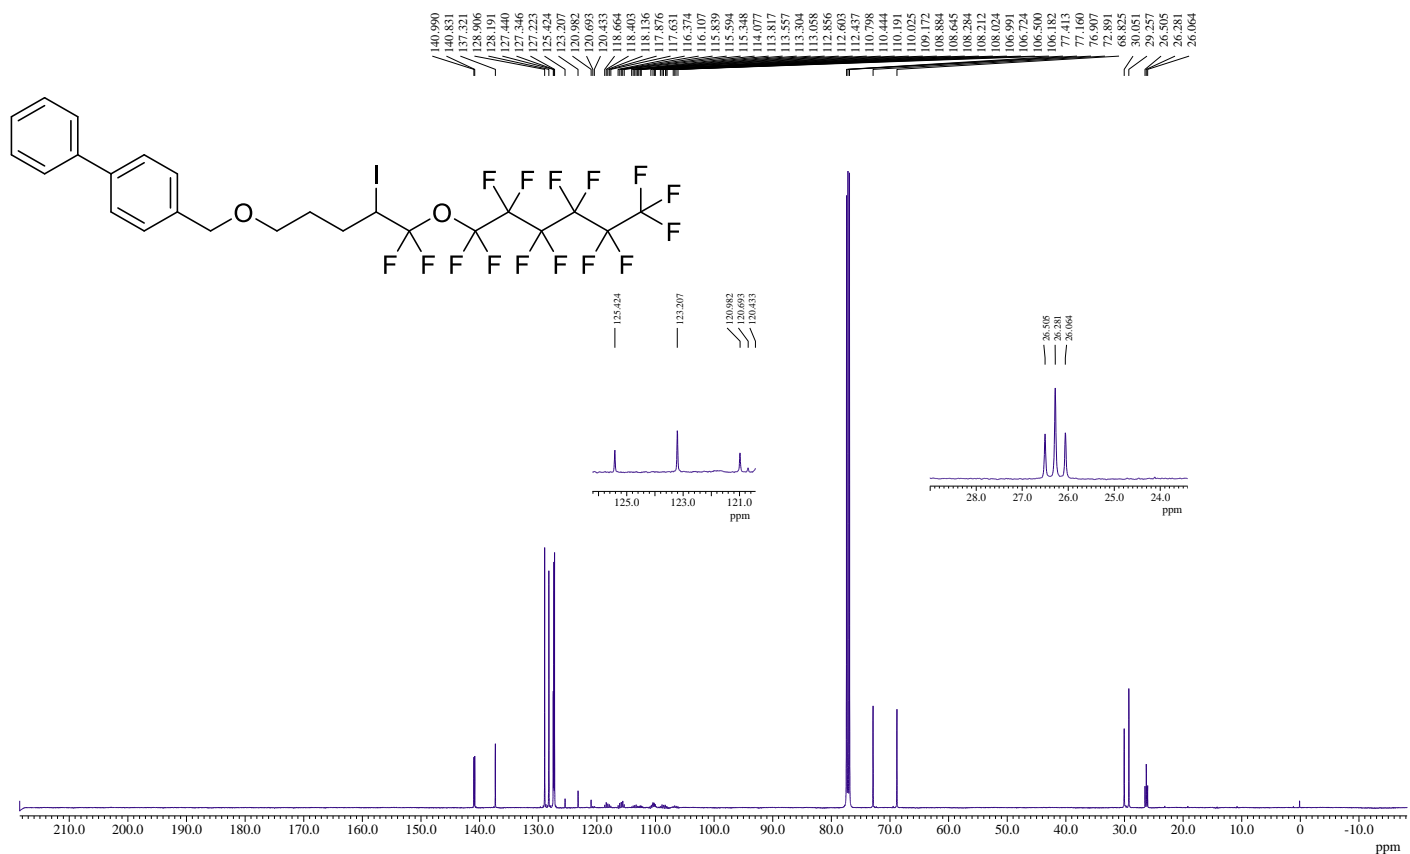

**<sup>19</sup>F NMR (282 MHz, CDCl<sub>3</sub>): 3ba**

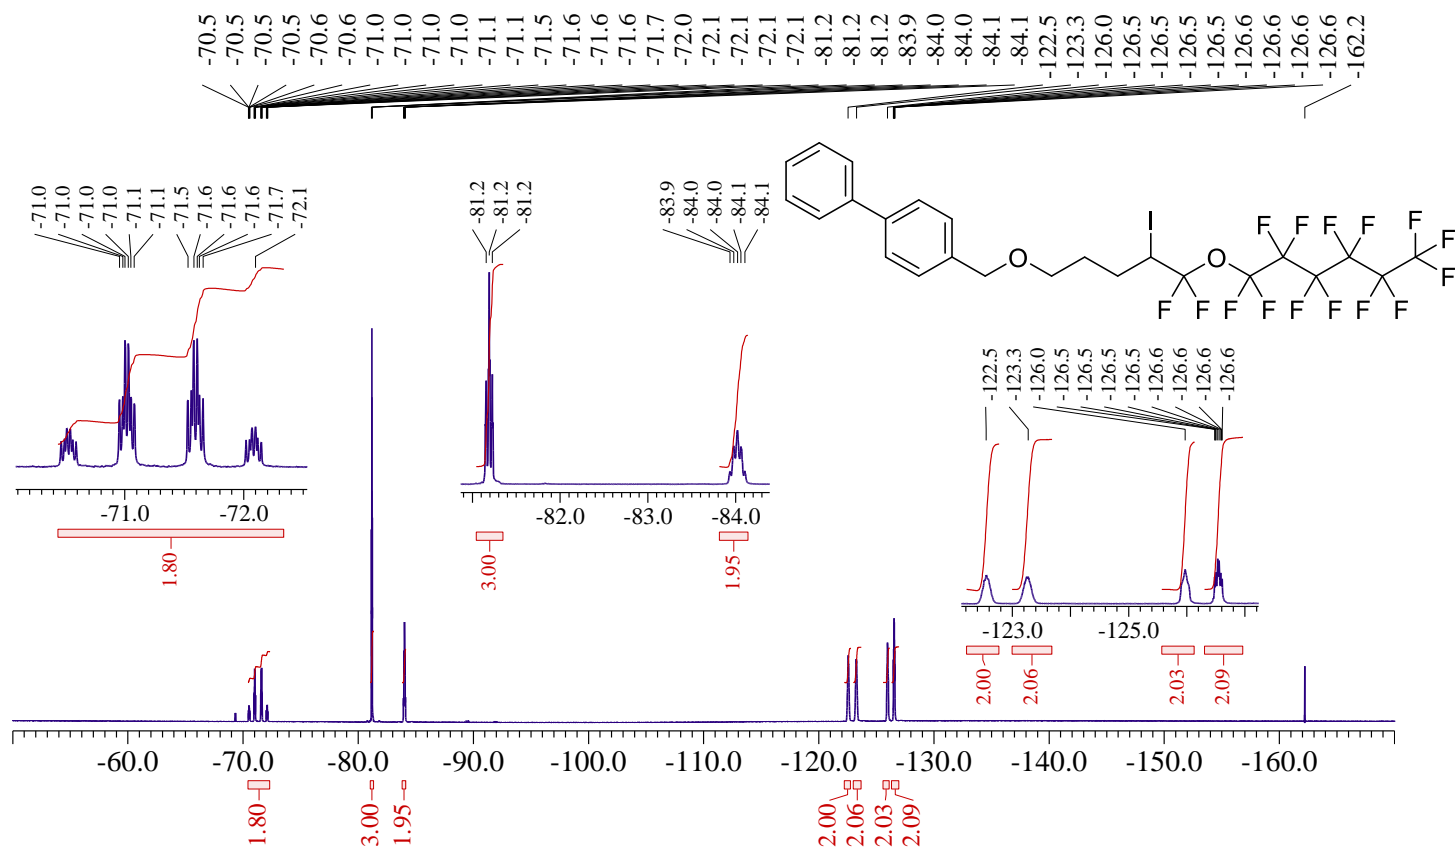



<sup>19</sup>F NMR (282 MHz, CDCl<sub>3</sub>): **3ca**

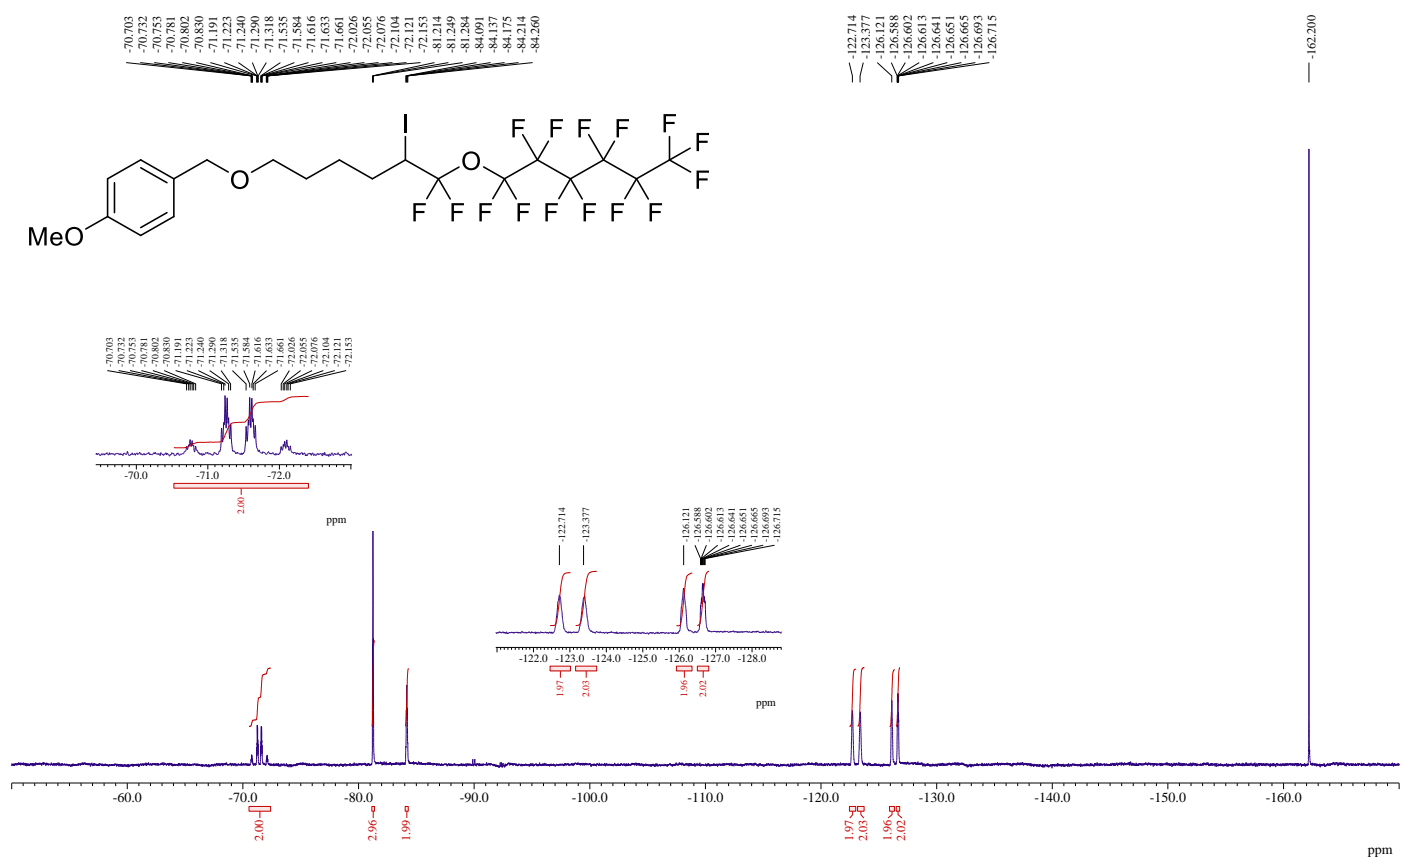

<sup>1</sup>H NMR (500 MHz, CDCl<sub>3</sub>): **3da**

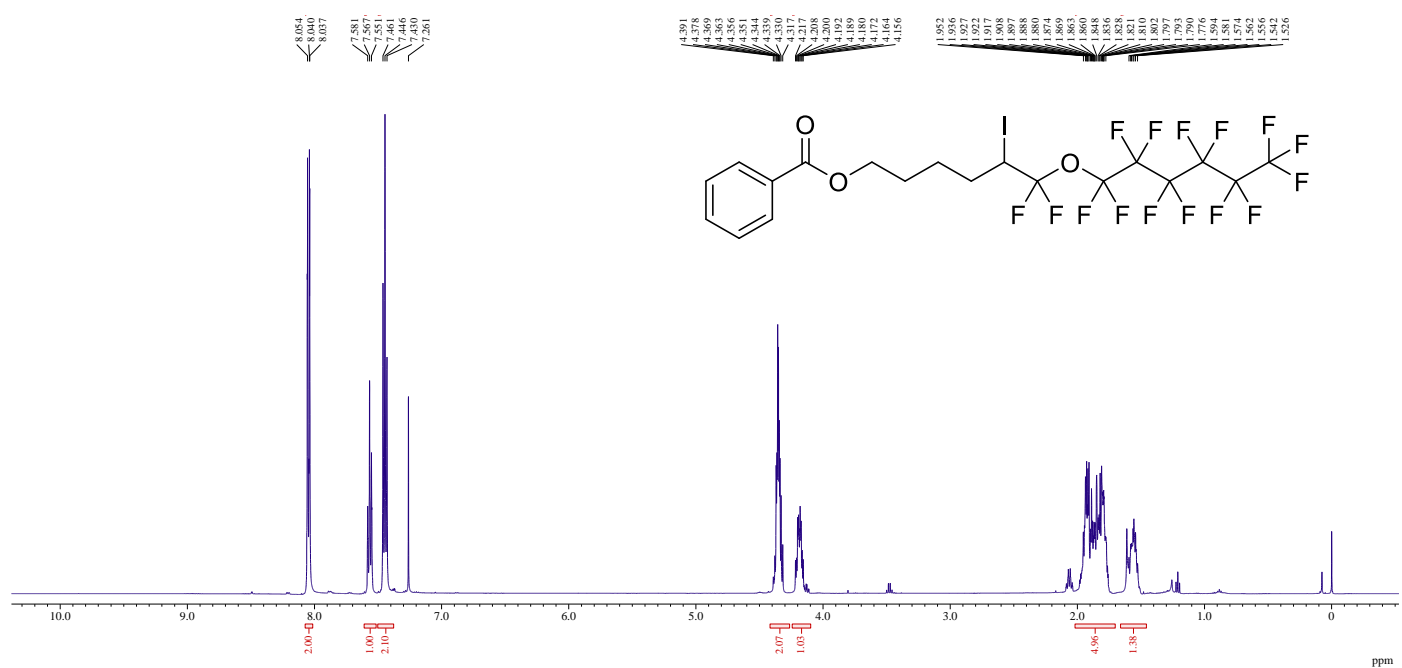

<sup>13</sup>C NMR (126 MHz, CDCl<sub>3</sub>): 3da

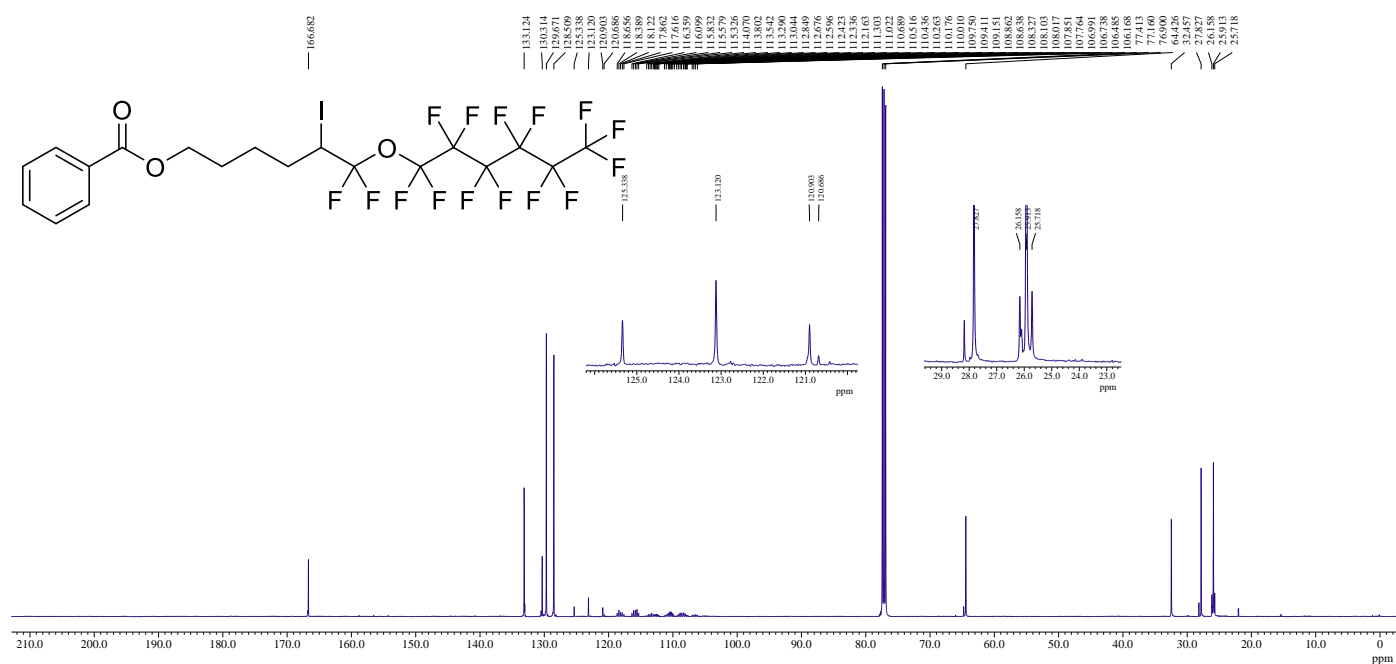

<sup>19</sup>F NMR (282 MHz, CDCl<sub>3</sub>): 3da

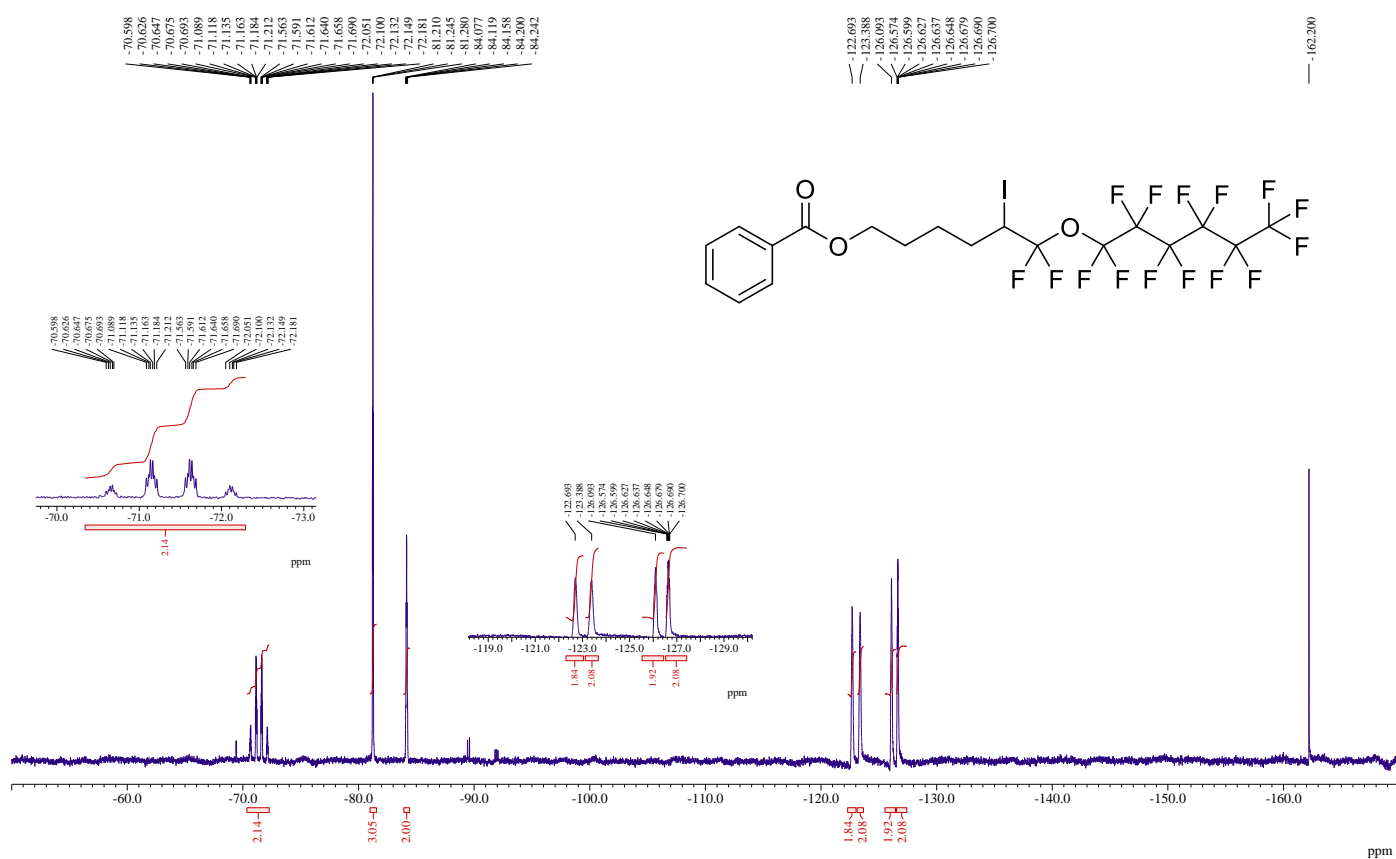

<sup>1</sup>H NMR (500 MHz, CDCl<sub>3</sub>): **3ea**

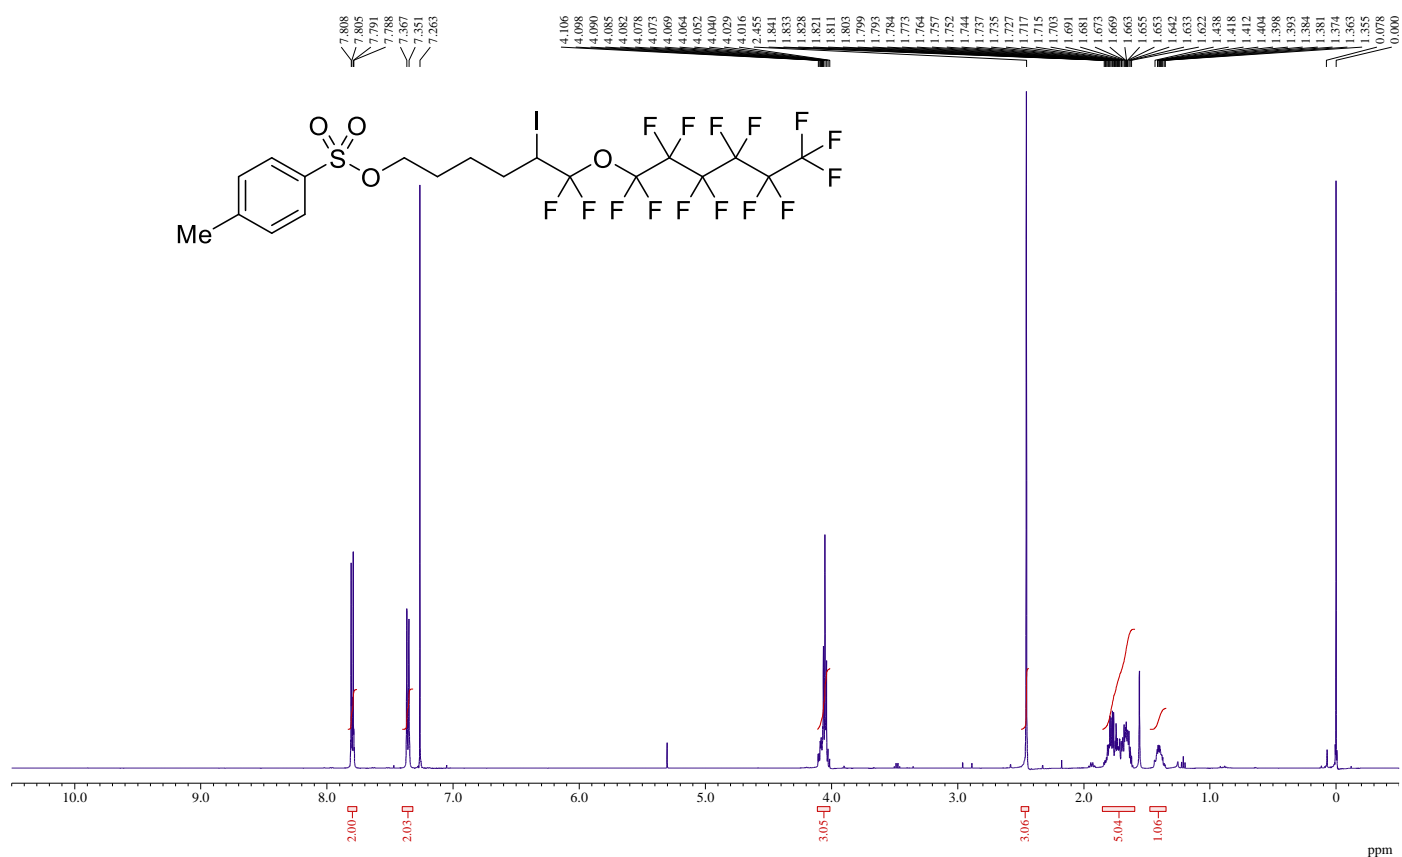

<sup>13</sup>C NMR (126 MHz, CDCl<sub>3</sub>): **3ea**

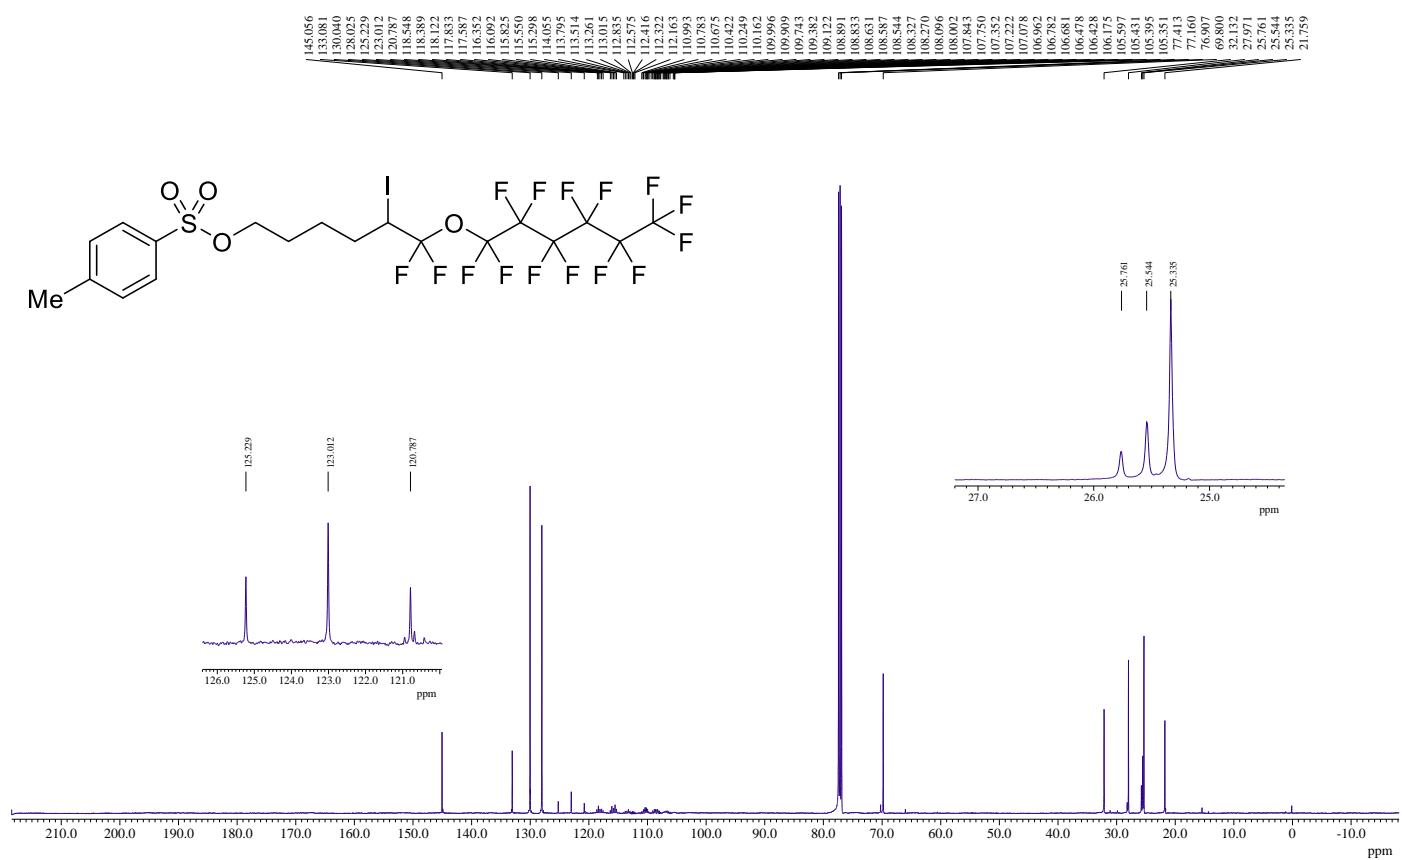

**<sup>19</sup>F NMR (282 MHz, CDCl<sub>3</sub>): 3ea**

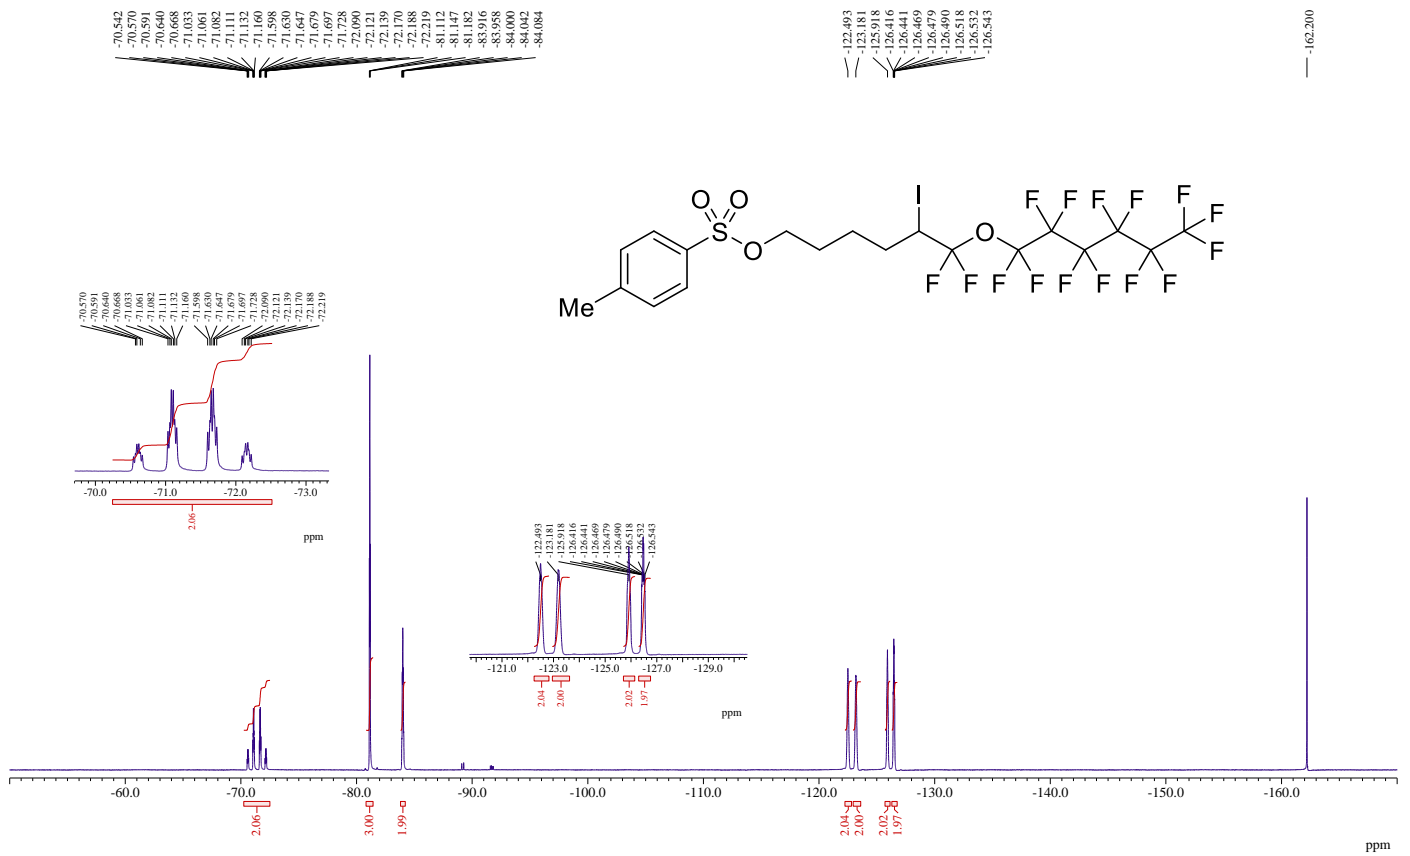

**<sup>1</sup>H NMR (500 MHz, CDCl<sub>3</sub>): 3fa**

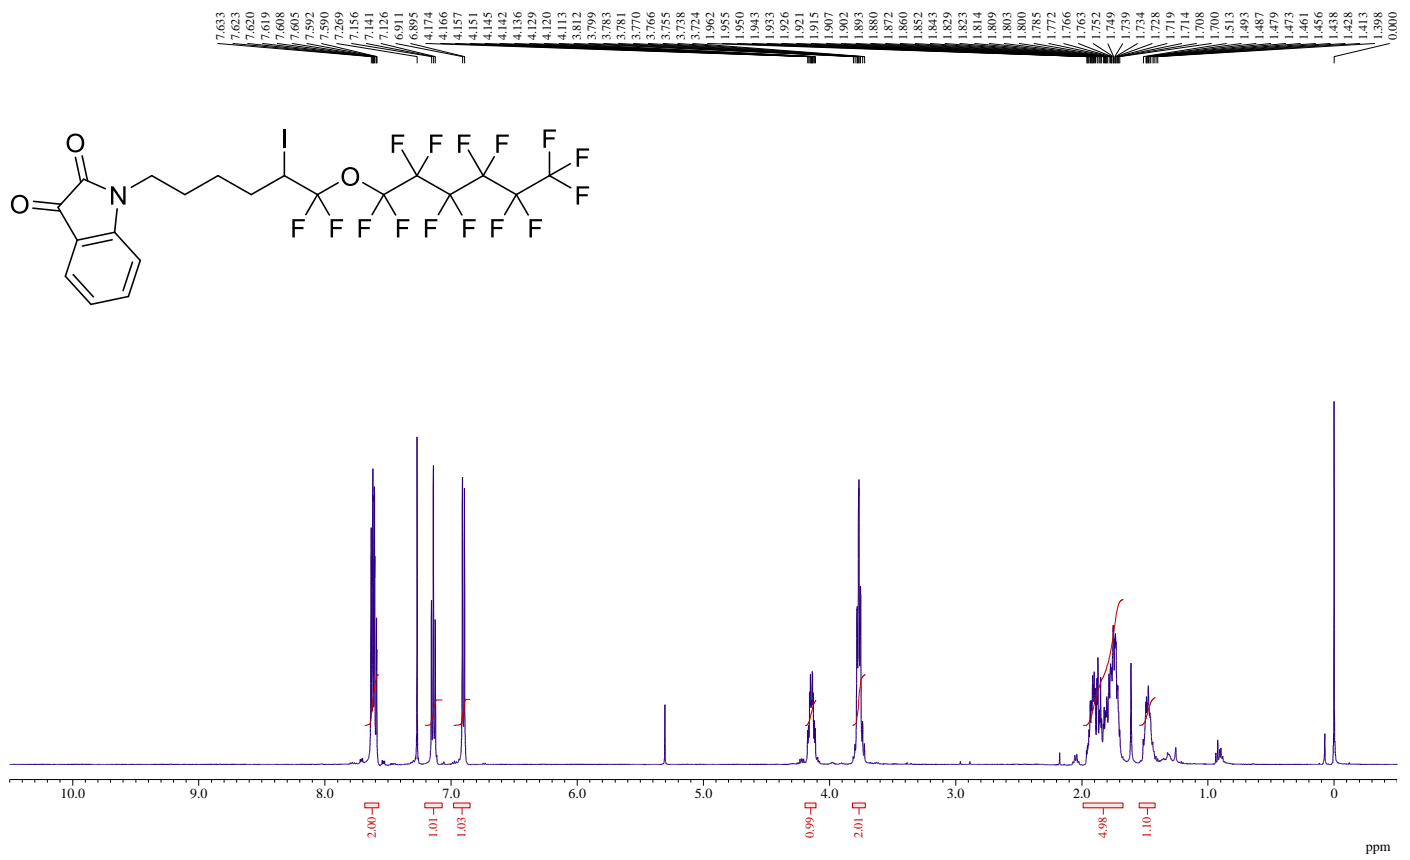





<sup>13</sup>C NMR (126 MHz, CDCl<sub>3</sub>): **3ga**

146.653  
144.999  
144.854  
144.609  
144.544  
142.875  
142.810  
142.673  
139.220  
138.989  
138.889  
137.241  
137.133  
137.024  
136.967  
121.567  
121.350  
120.939  
120.679  
119.277  
119.054  
118.649  
118.389  
118.122  
117.934  
117.826  
116.881  
116.771  
116.352  
116.092  
115.832  
115.767  
115.514  
114.012  
113.995  
113.716  
113.456  
113.203  
112.654  
112.488  
112.401  
112.235  
110.581  
108.877  
108.870  
106.328  
106.298  
106.272  
105.149  
105.063  
104.998  
104.991  
104.984  
83.921  
83.632  
83.379  
83.090  
82.837  
81.776  
81.494  
81.384  
81.054  
80.945  
80.692  
77.143  
77.160  
76.907

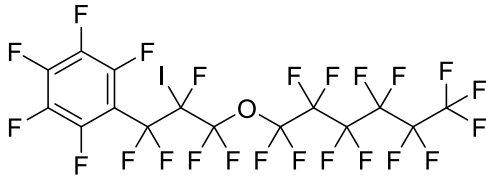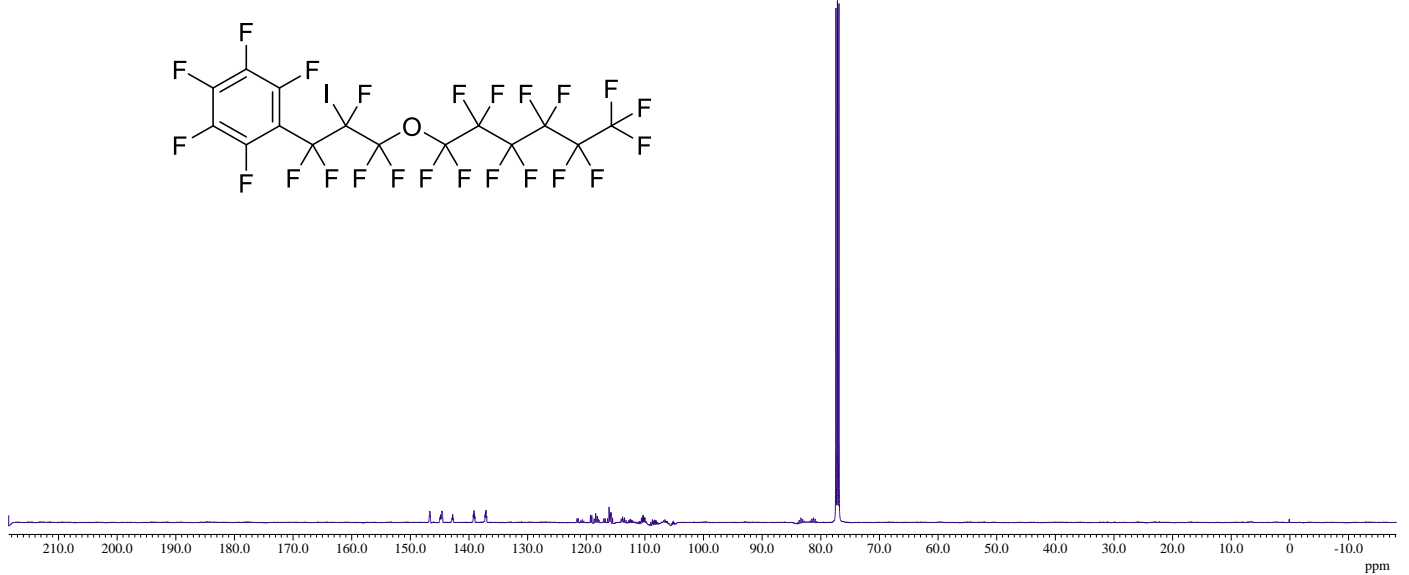

<sup>19</sup>F NMR (282 MHz, CDCl<sub>3</sub>): **3ga**

-63.050  
-79.389  
-79.884  
-80.326  
-80.824  
-80.976  
-80.946  
-81.762  
-81.797  
-81.825  
-81.857  
-82.243  
-82.278  
-82.309  
-82.344  
-82.373  
-82.411  
-82.450  
-82.485  
-82.513  
-82.580  
-82.669  
-82.697  
-82.721  
-82.773  
-82.805  
-82.840  
-101.178  
-101.227  
-101.287  
-101.339  
-101.395  
-101.448  
-101.488  
-101.533  
-101.553  
-102.231  
-102.290  
-102.343  
-102.395  
-102.448  
-102.511  
-102.525  
-126.048  
-130.648  
-131.283  
-131.308  
-131.333  
-131.357  
-131.385  
-131.410  
-131.427  
-140.278  
-140.337  
-140.393  
-140.499  
-148.261  
-148.321  
-148.384  
-148.447  
-148.507  
-148.620  
-151.412  
-151.433  
-151.453  
-151.507  
-151.528  
-151.545  
-151.563  
-151.584  
-151.605  
-164.467  
-164.477  
-164.544  
-164.551  
-164.562  
-164.622  
-164.667  
-164.688  
-164.695  
-164.726  
-164.762  
-164.804

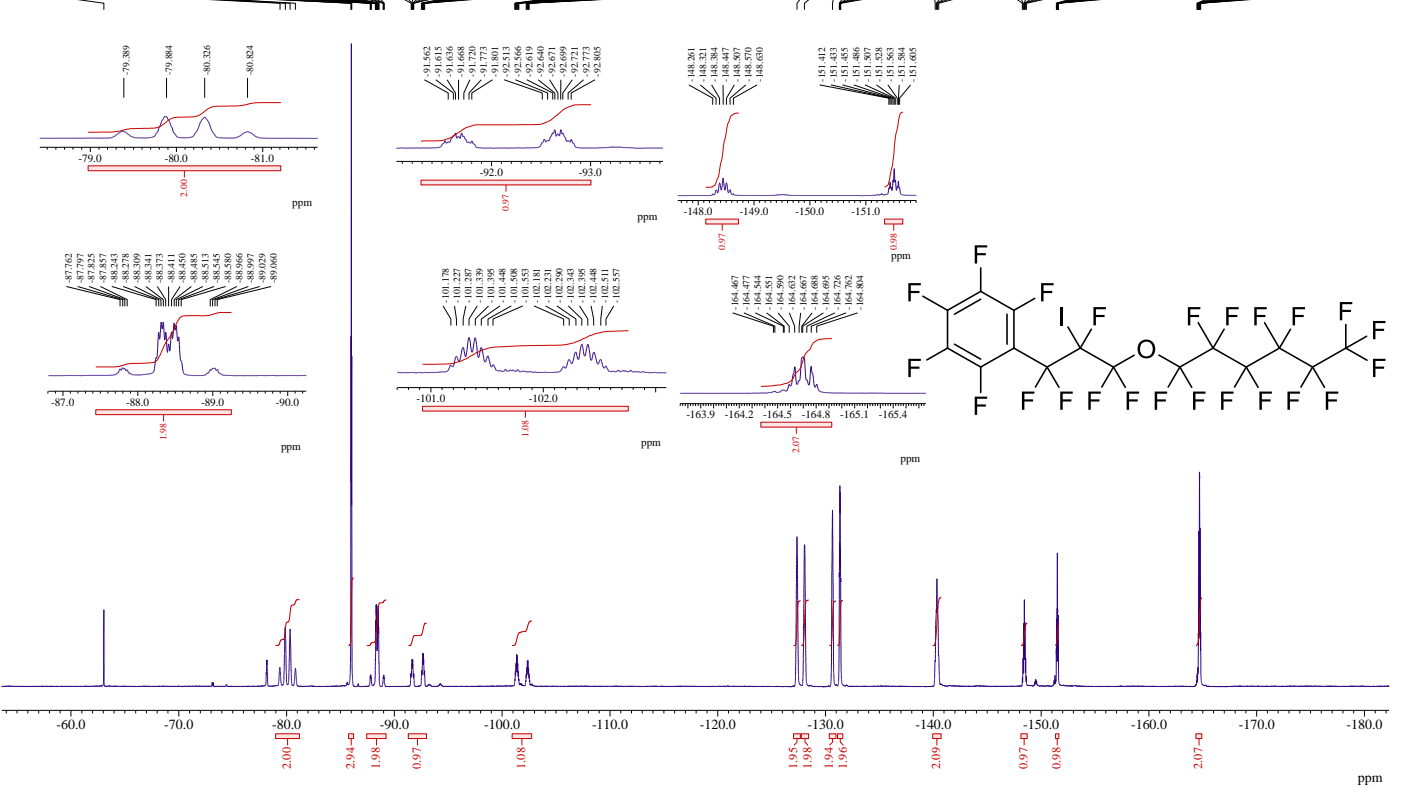

<sup>1</sup>H NMR (500 MHz, CDCl<sub>3</sub>): **3na**

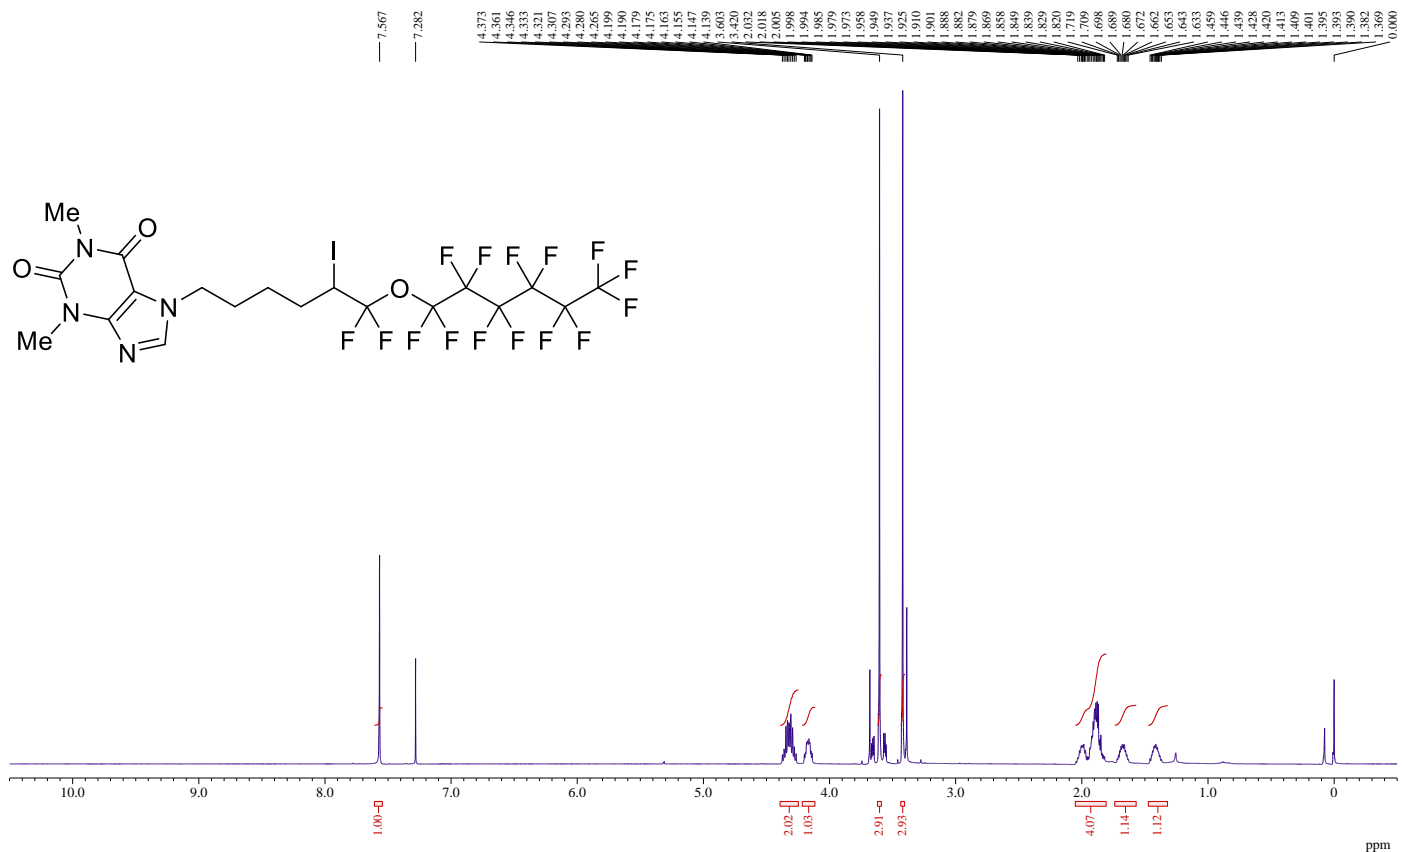

<sup>13</sup>C NMR (126 MHz, CDCl<sub>3</sub>): **3na**

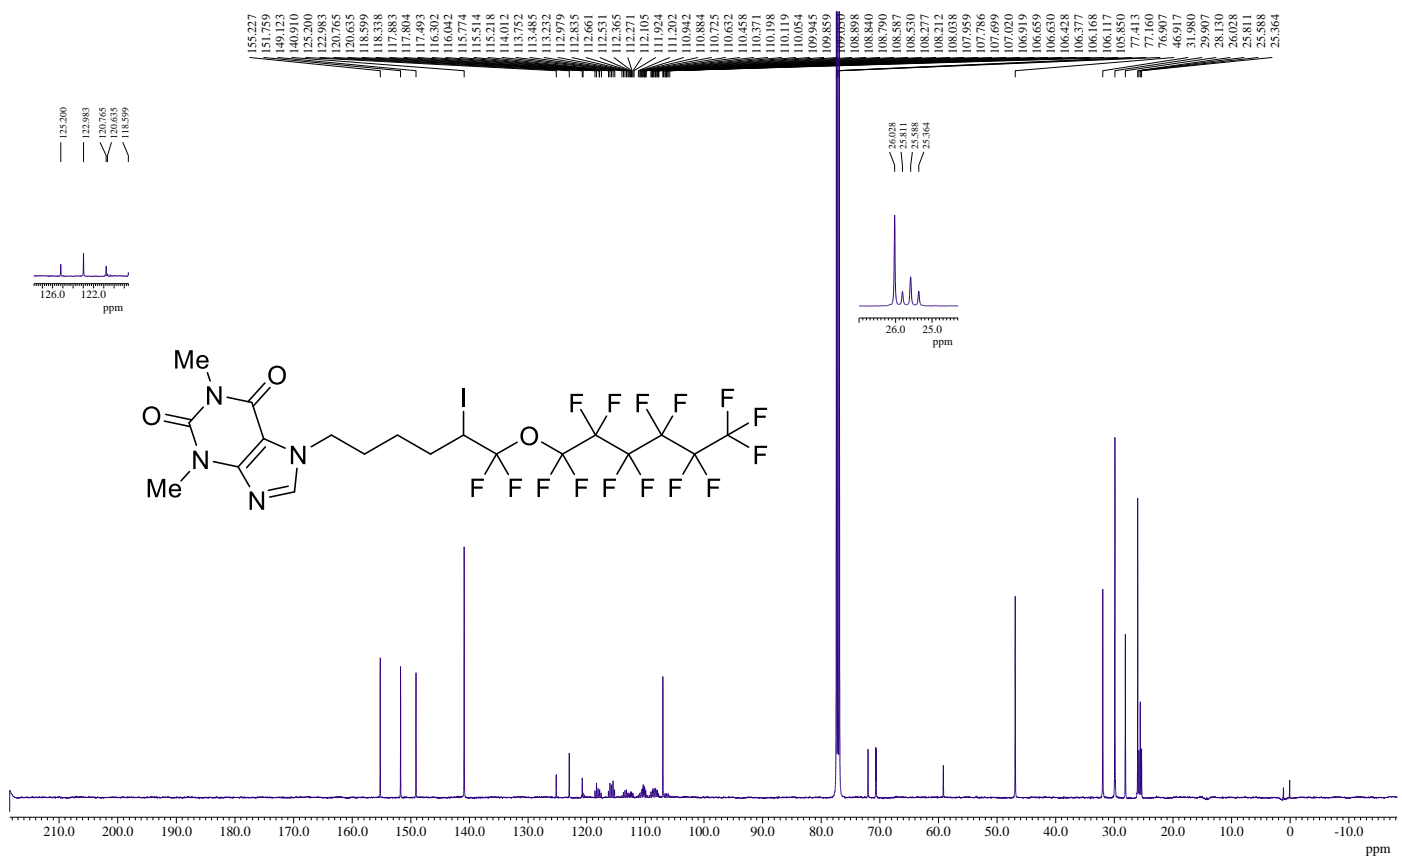

**<sup>19</sup>F NMR (282 MHz, CDCl<sub>3</sub>): 3na**

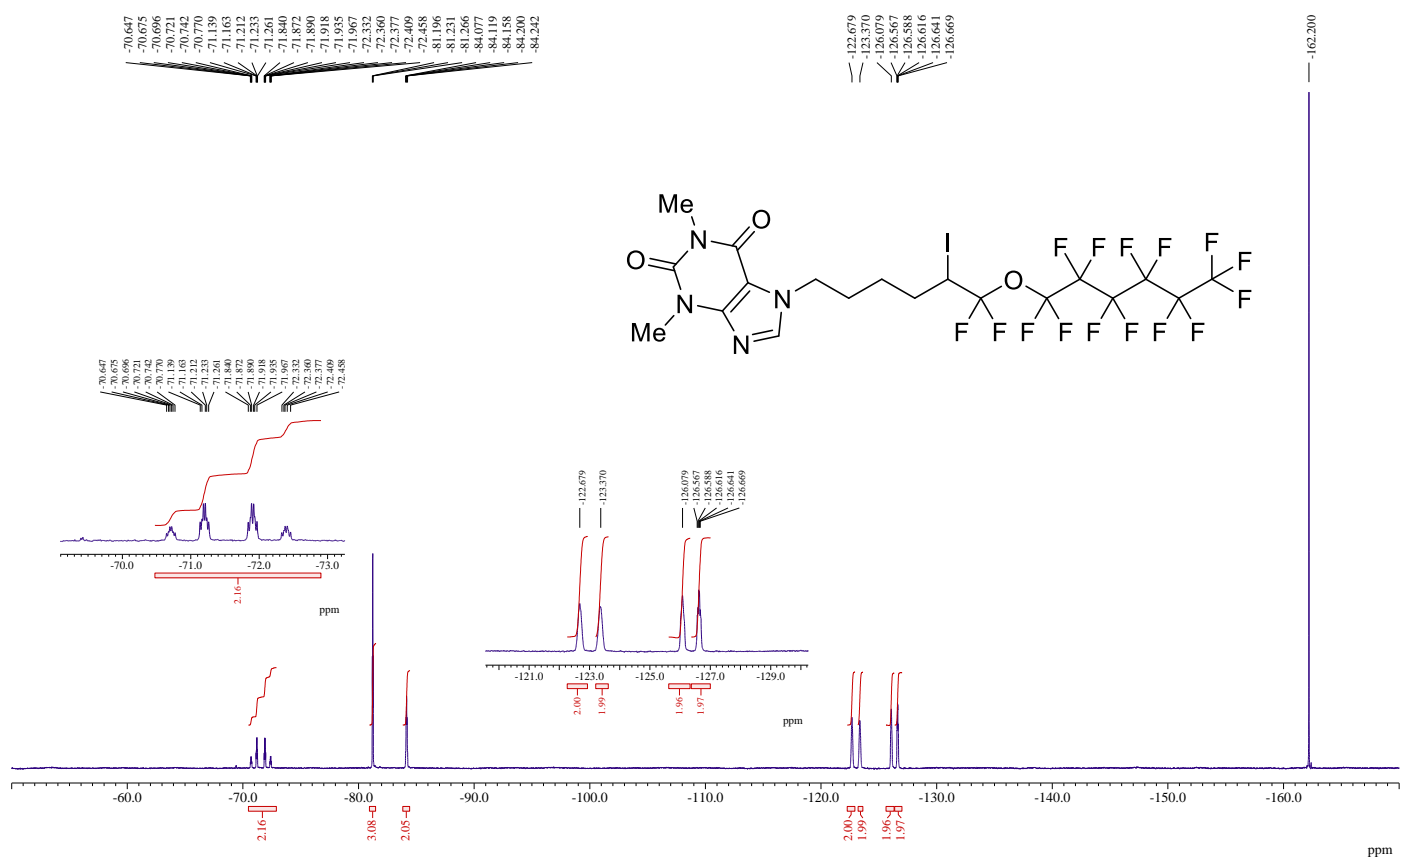

**<sup>1</sup>H NMR (500 MHz, CDCl<sub>3</sub>): 3oa**

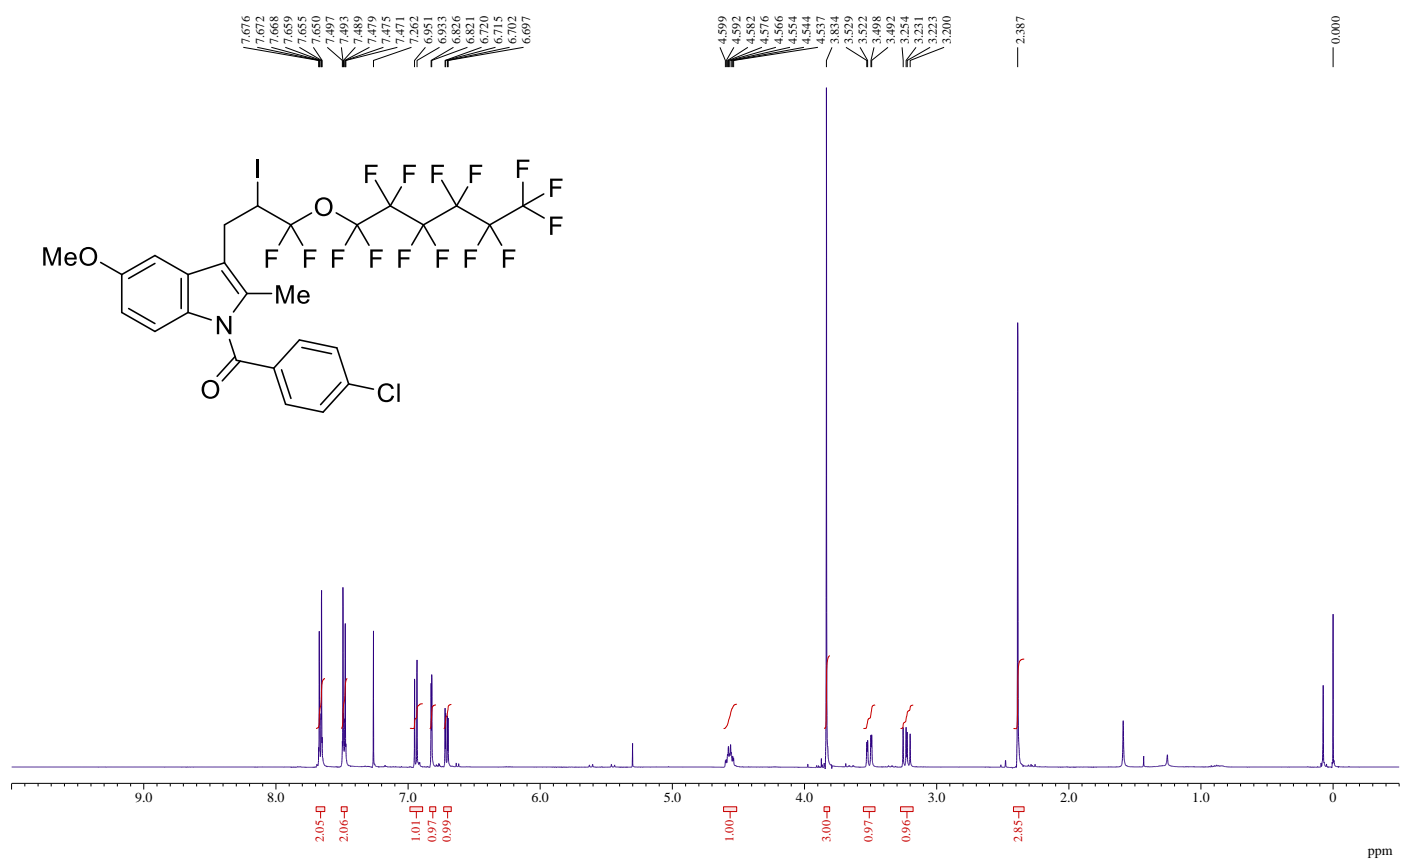

**<sup>13</sup>C NMR (126 MHz, CDCl<sub>3</sub>): 30a**

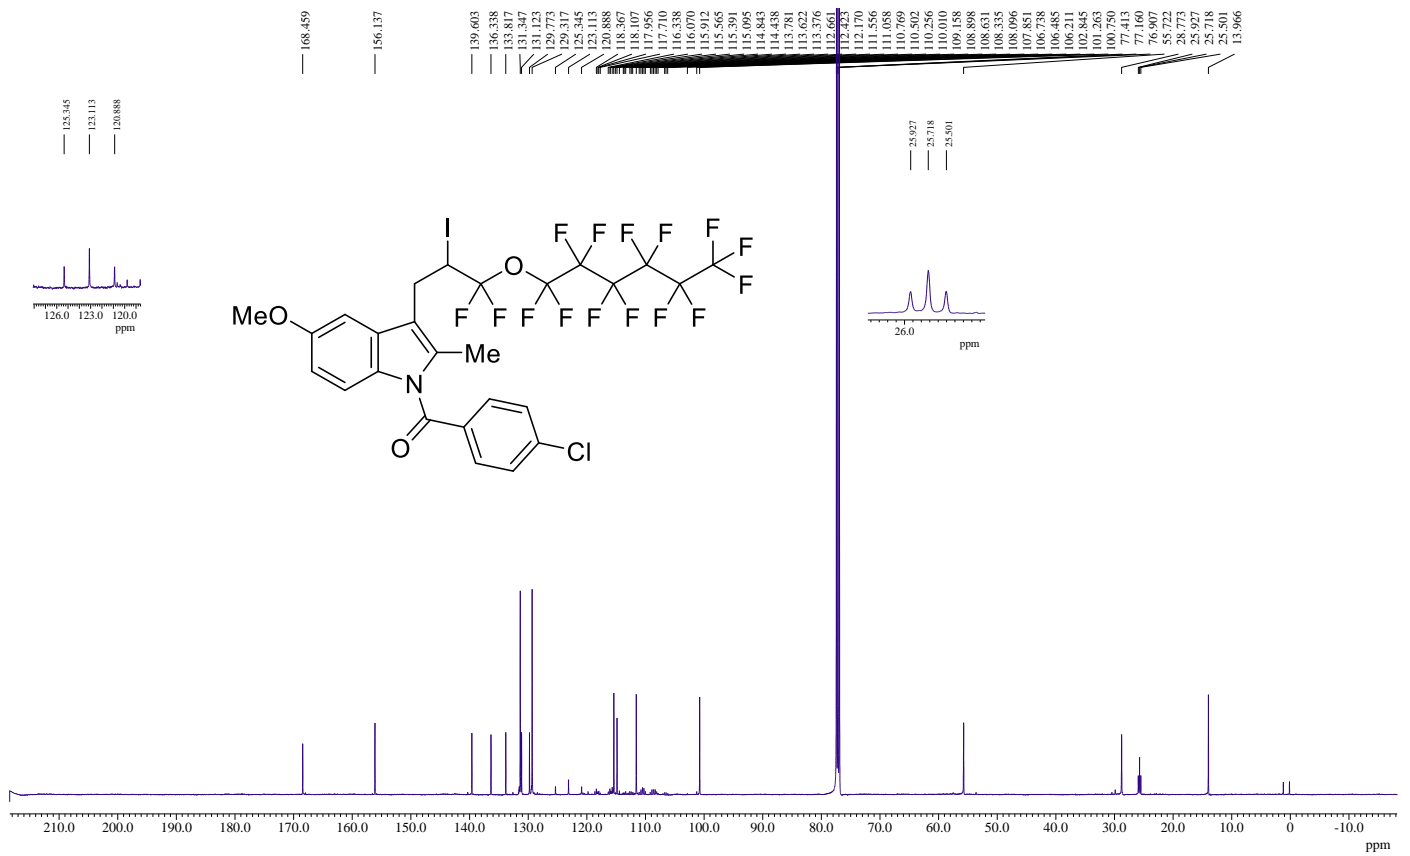

**<sup>19</sup>F NMR (282 MHz, CDCl<sub>3</sub>): 30a**

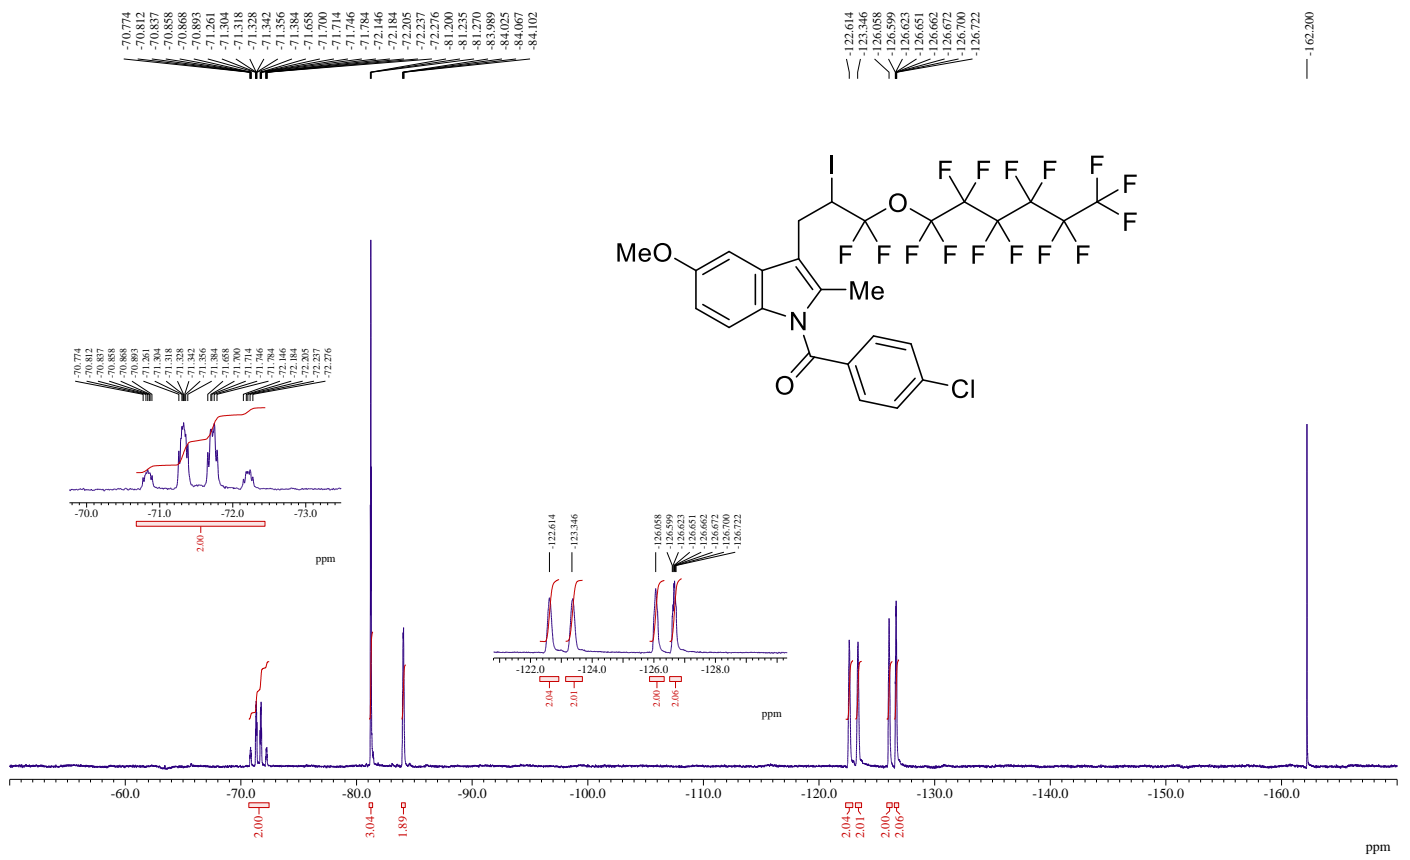

**<sup>1</sup>H NMR (500 MHz, CDCl<sub>3</sub>): 3pa**

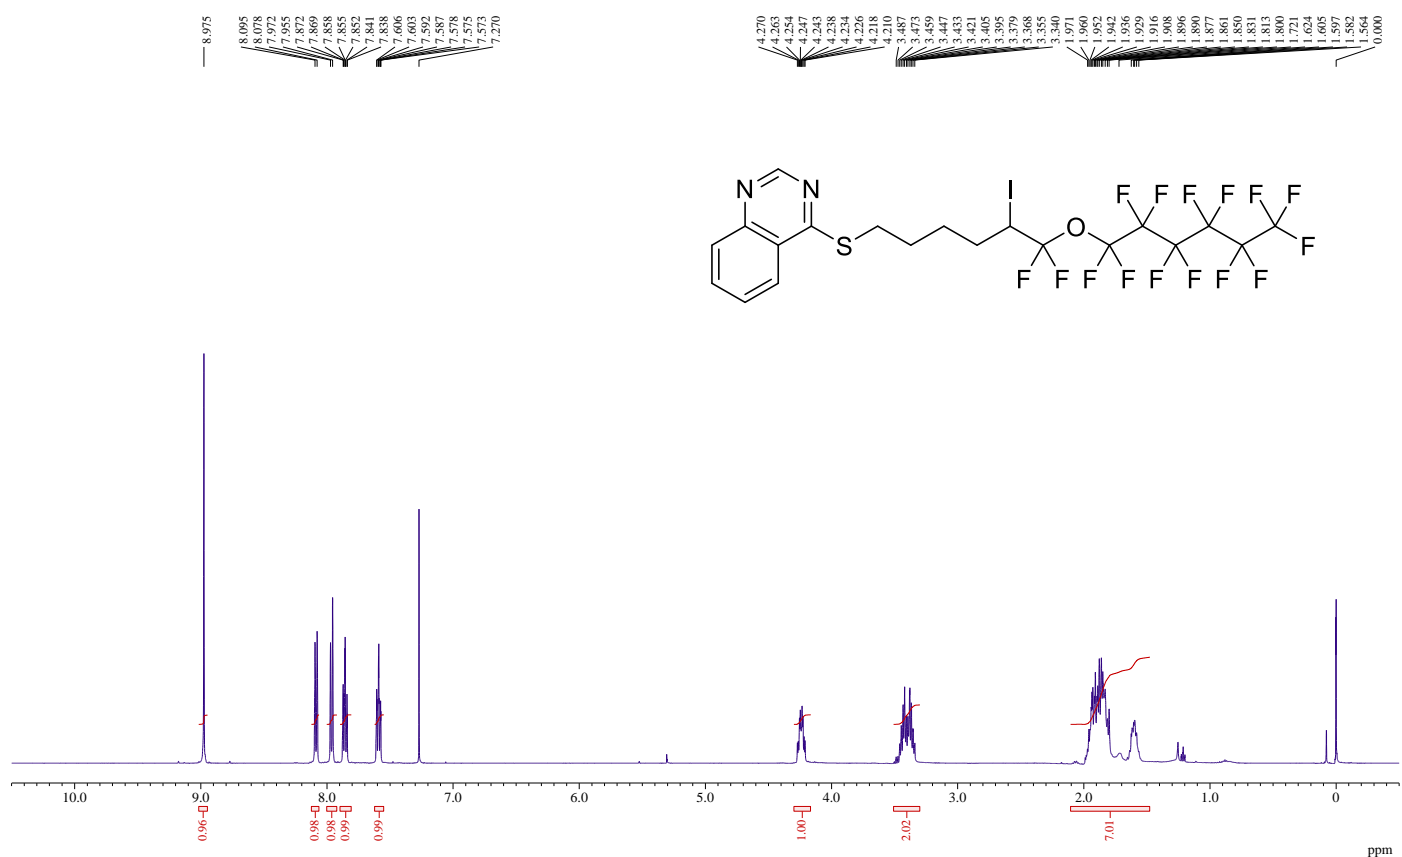

**<sup>13</sup>C NMR (126 MHz, CDCl<sub>3</sub>): 3pa**

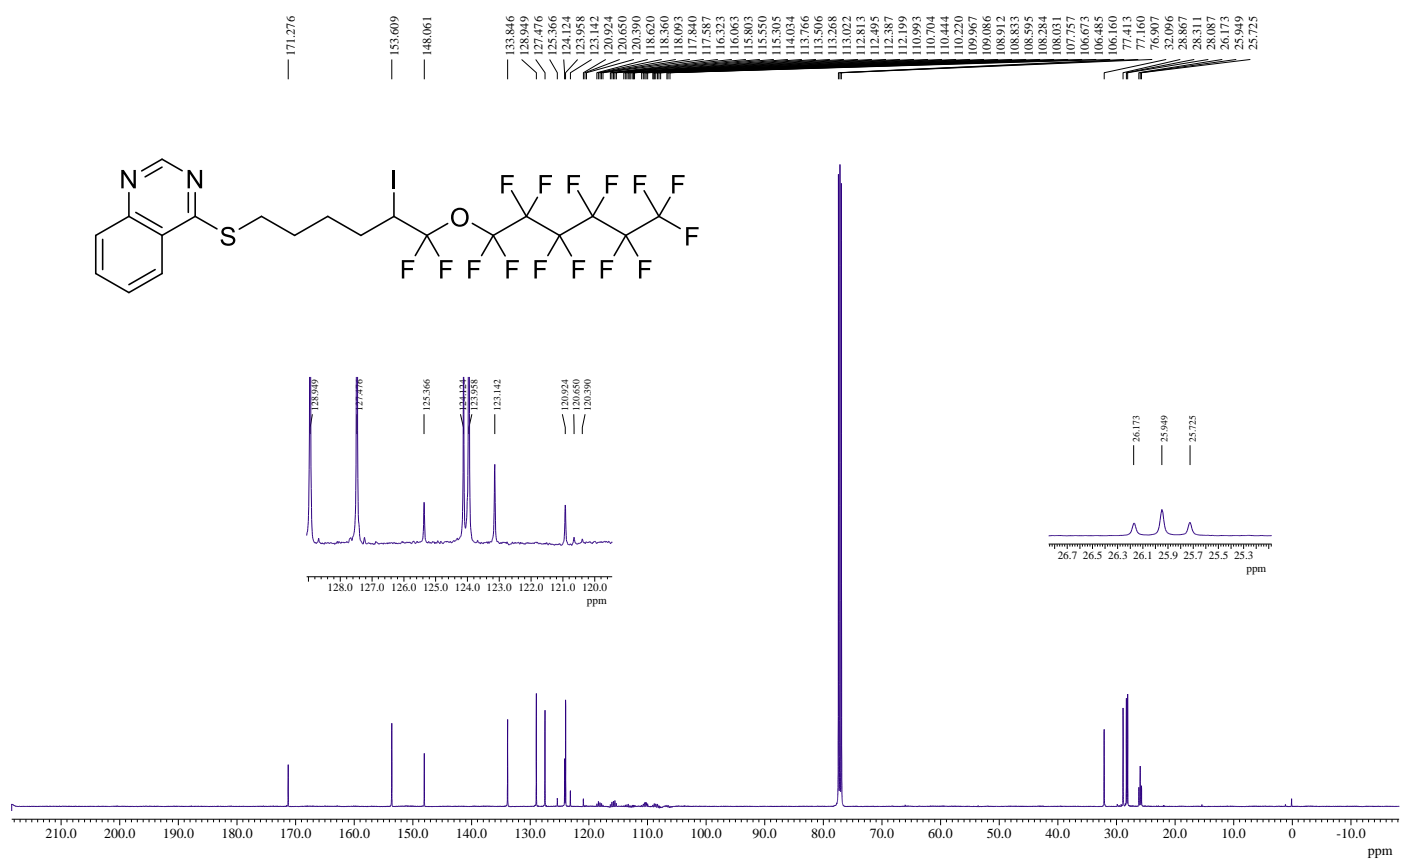

**$^{19}\text{F}$  NMR (282 MHz,  $\text{CDCl}_3$ ): 3pa**

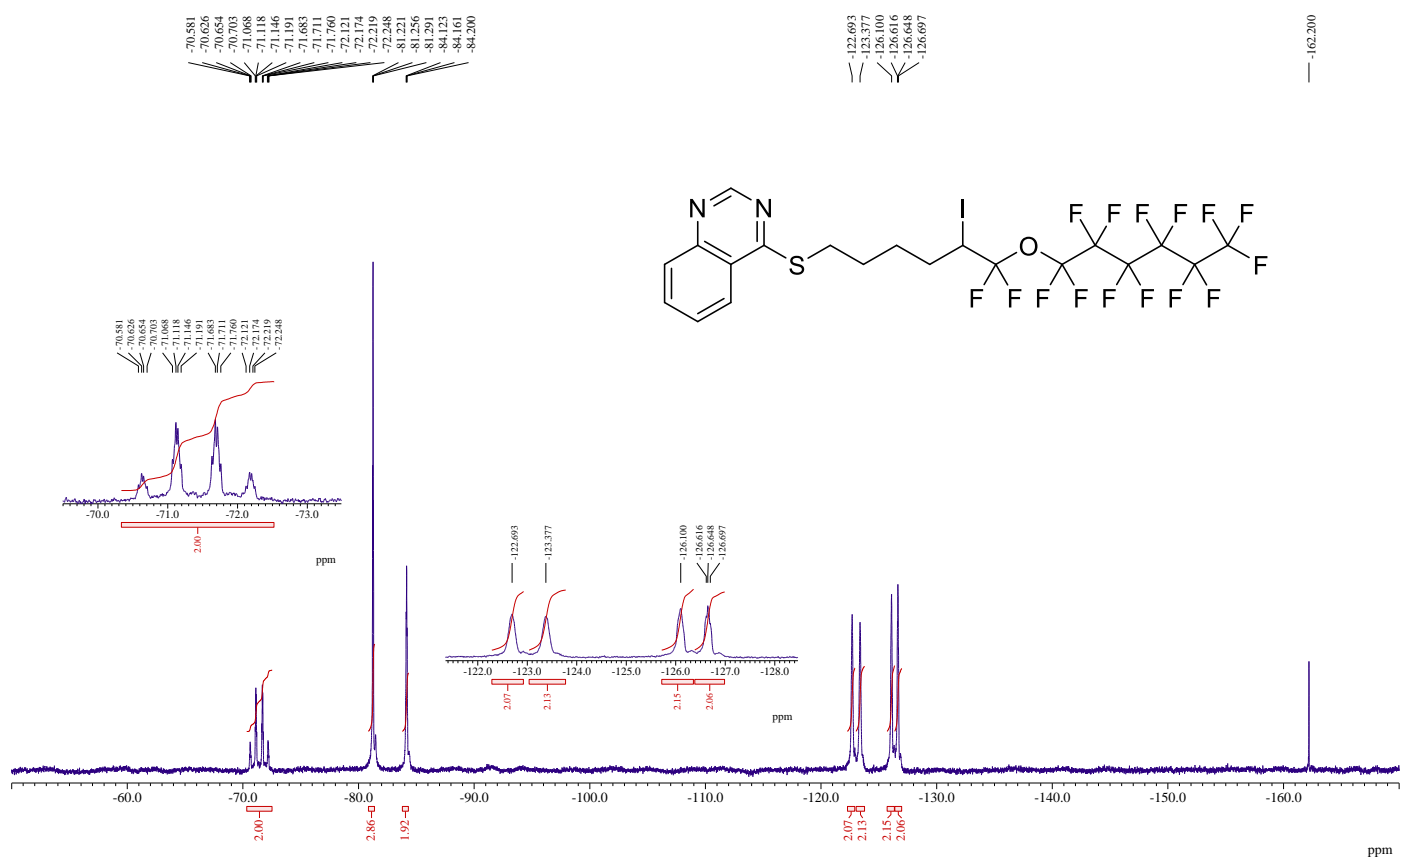

**$^1\text{H}$  NMR (500 MHz,  $\text{CDCl}_3$ ): 3qa**

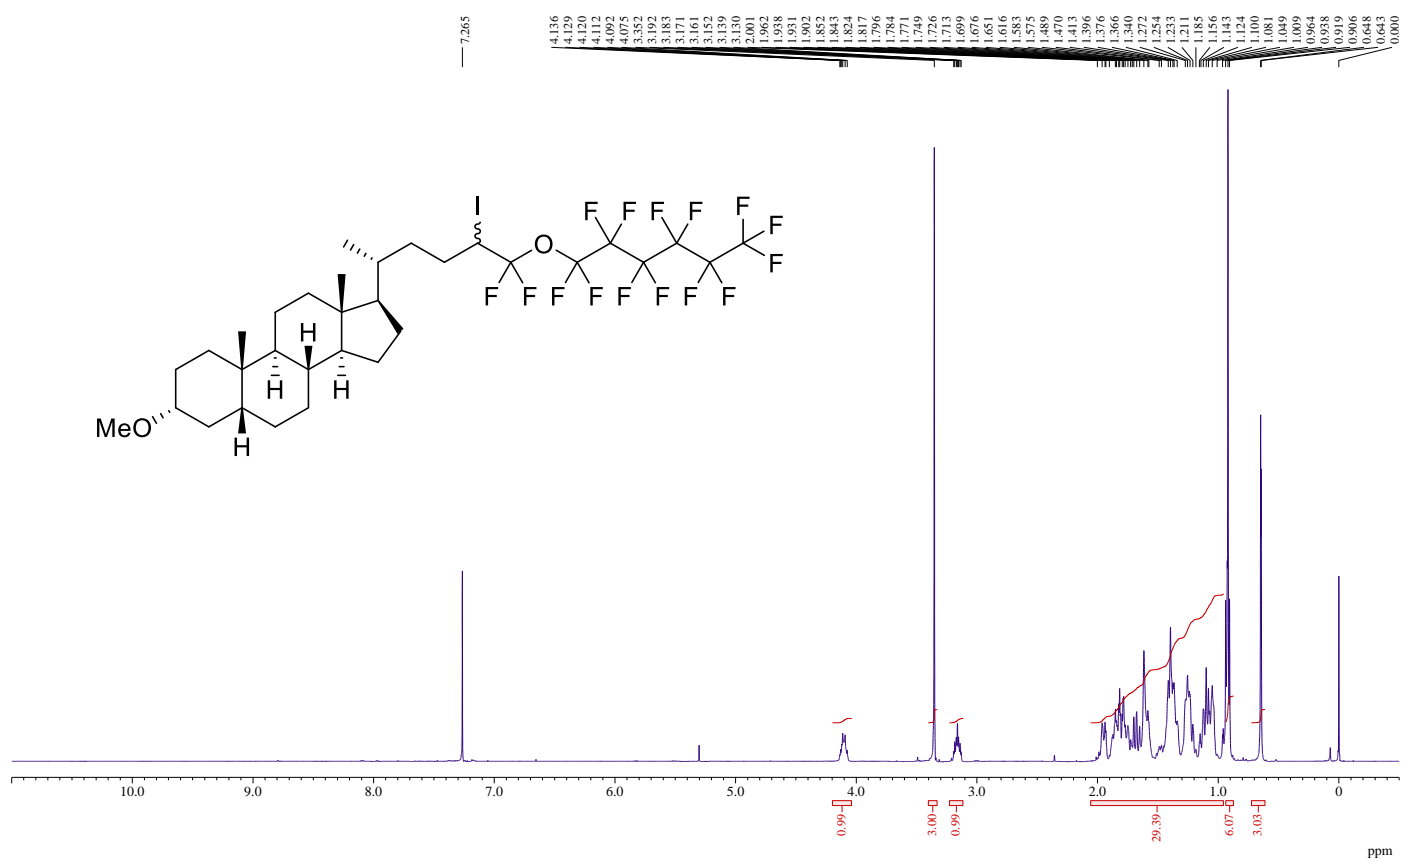

**<sup>13</sup>C NMR (126 MHz, CDCl<sub>3</sub>): 3qa**

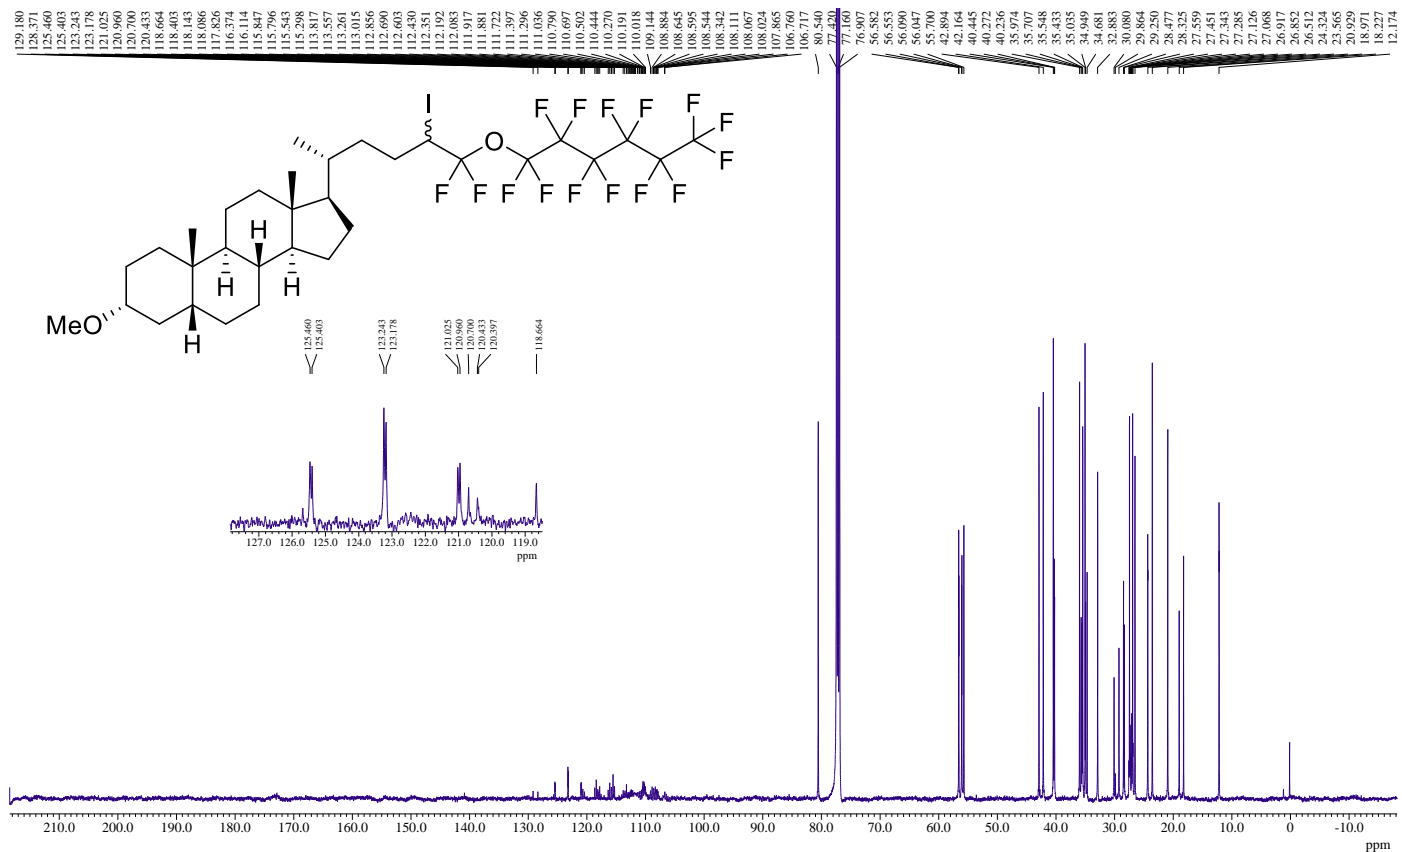

**<sup>19</sup>F NMR (282 MHz, CDCl<sub>3</sub>): 3qa**

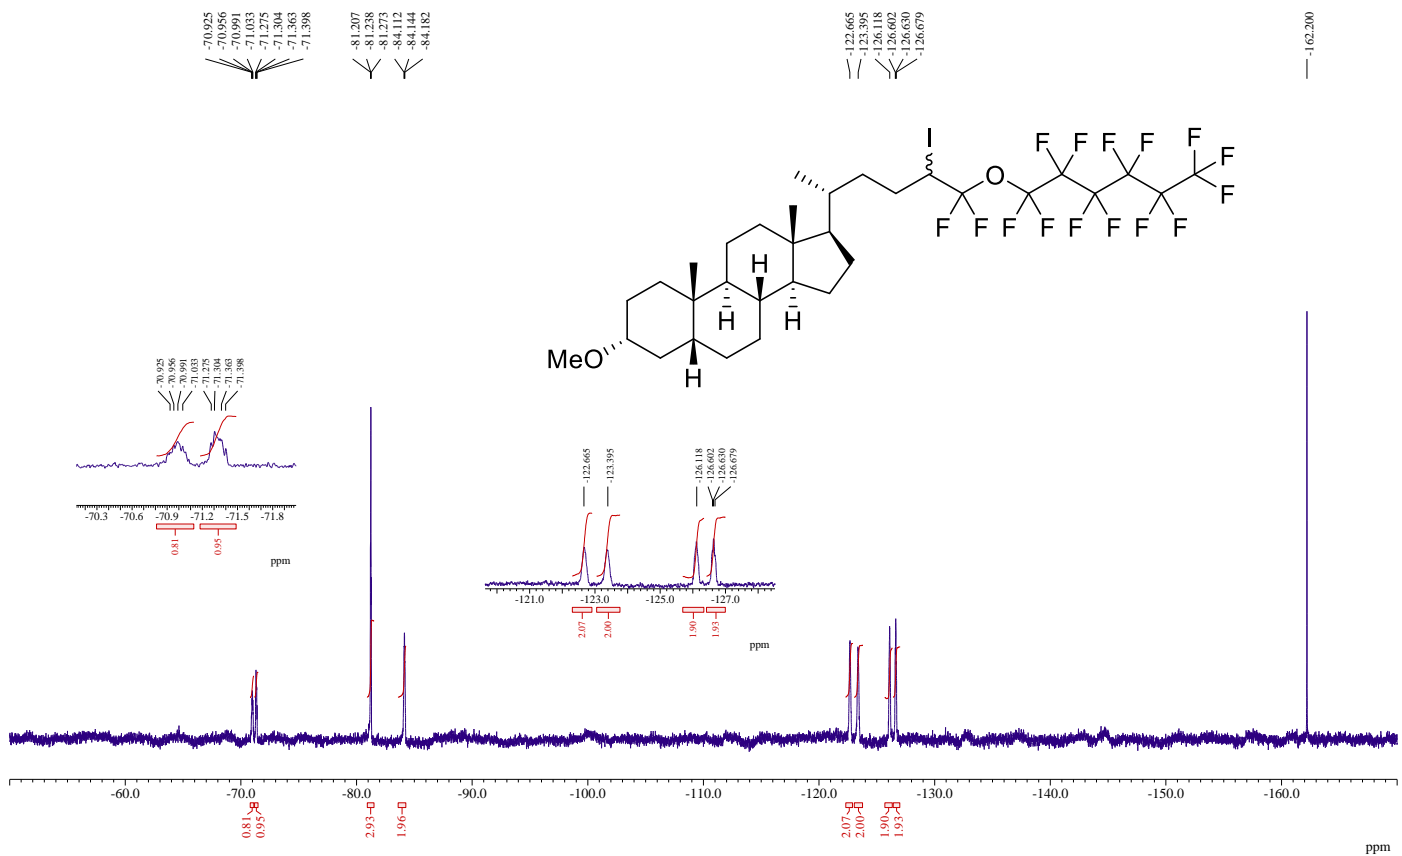

<sup>1</sup>H NMR (500 MHz, CDCl<sub>3</sub>): **3ra**

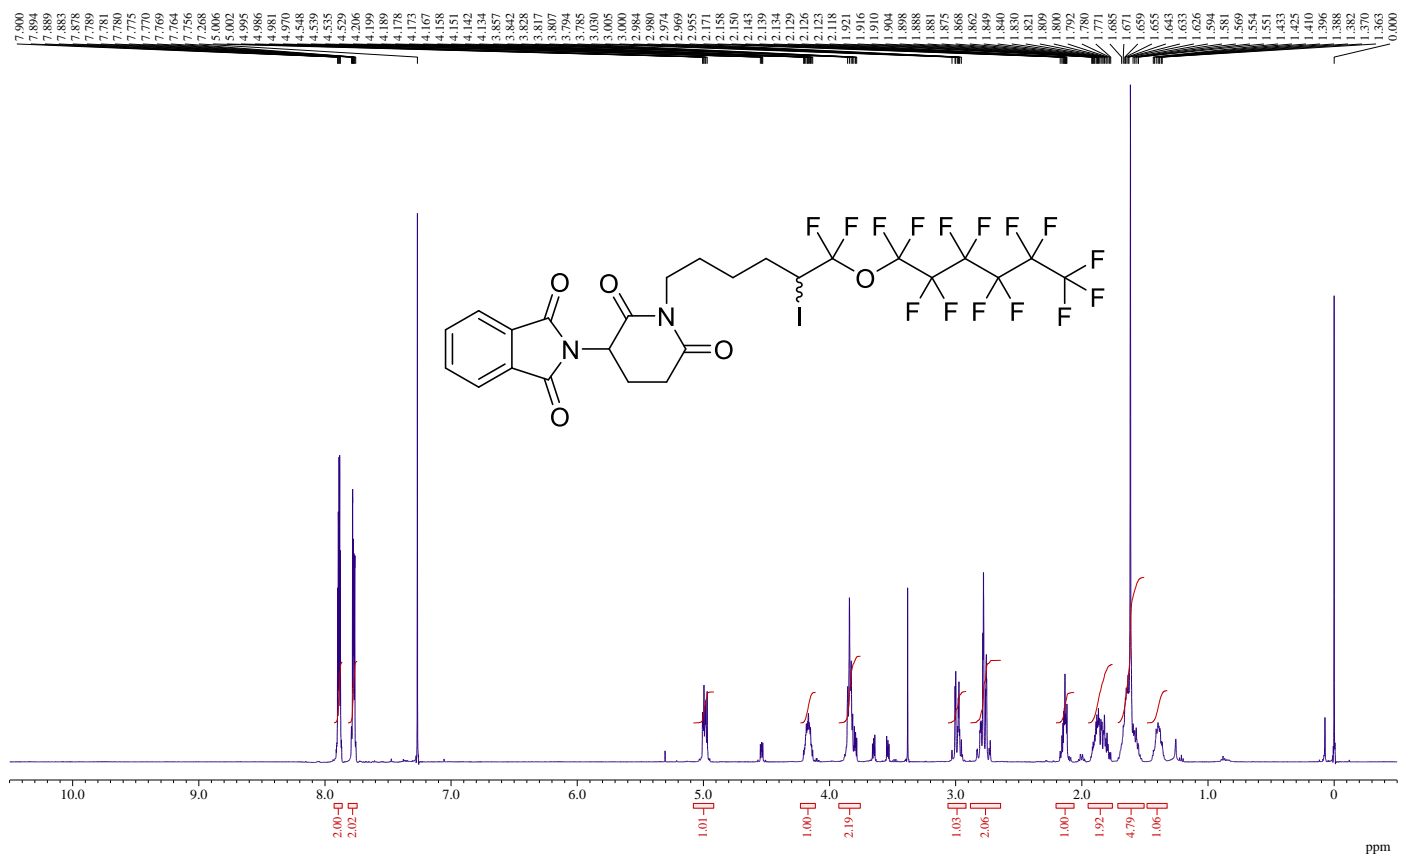

<sup>13</sup>C NMR (126 MHz, CDCl<sub>3</sub>): **3ra**

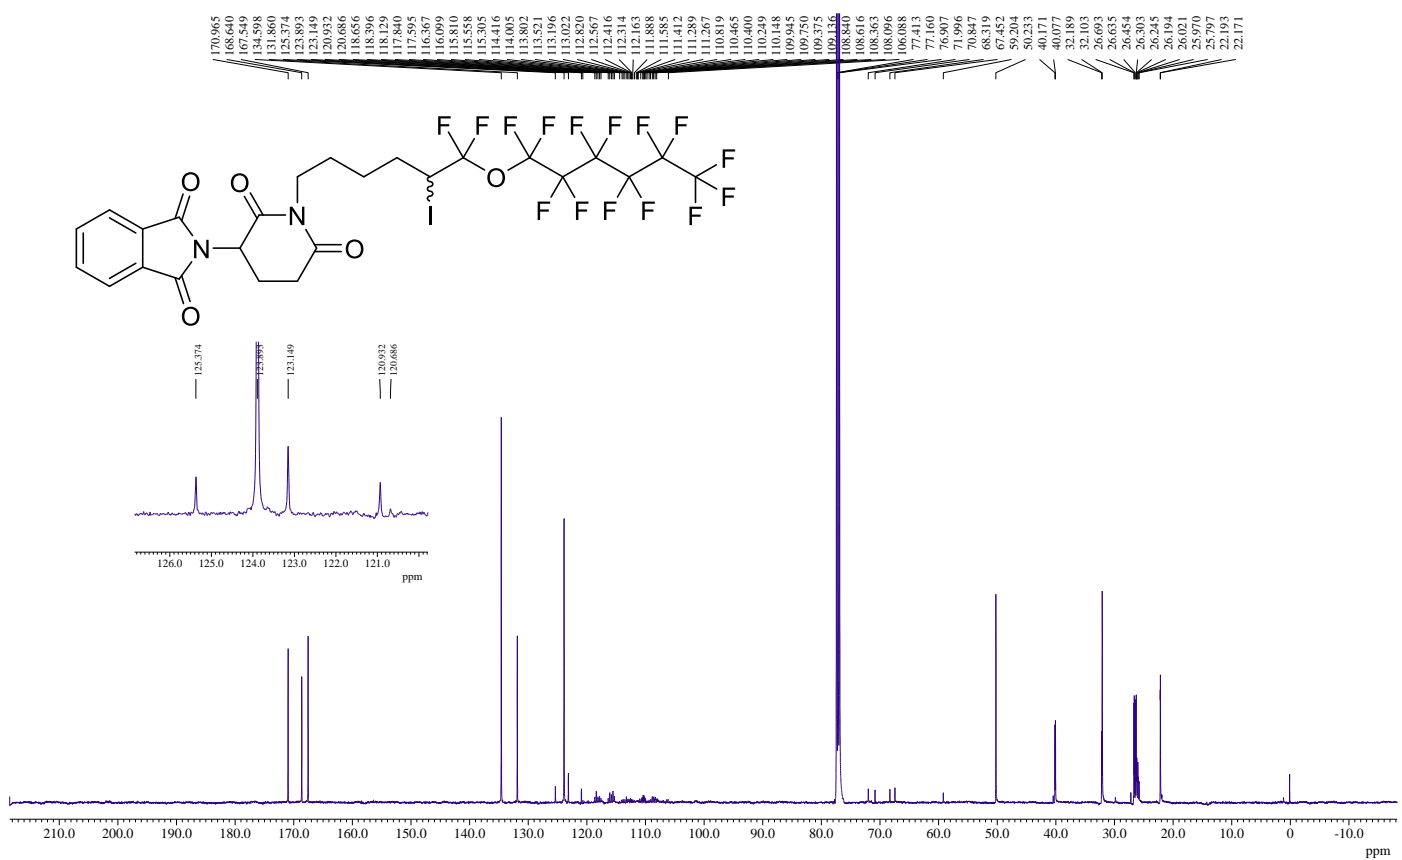



<sup>19</sup>F NMR (282 MHz, CDCl<sub>3</sub>): **3ra**

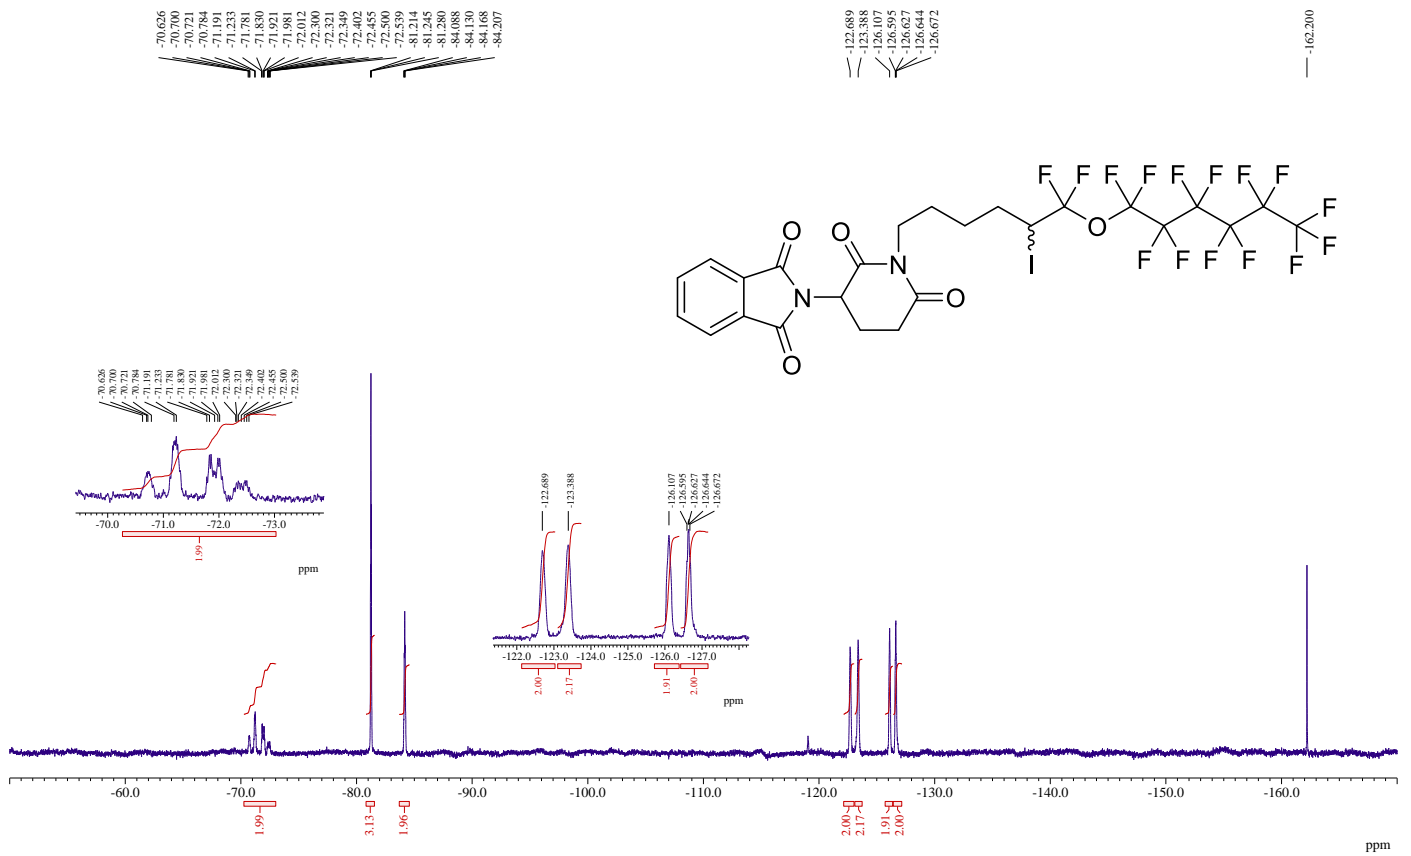

<sup>1</sup>H NMR (500 MHz, CDCl<sub>3</sub>): **4aa**

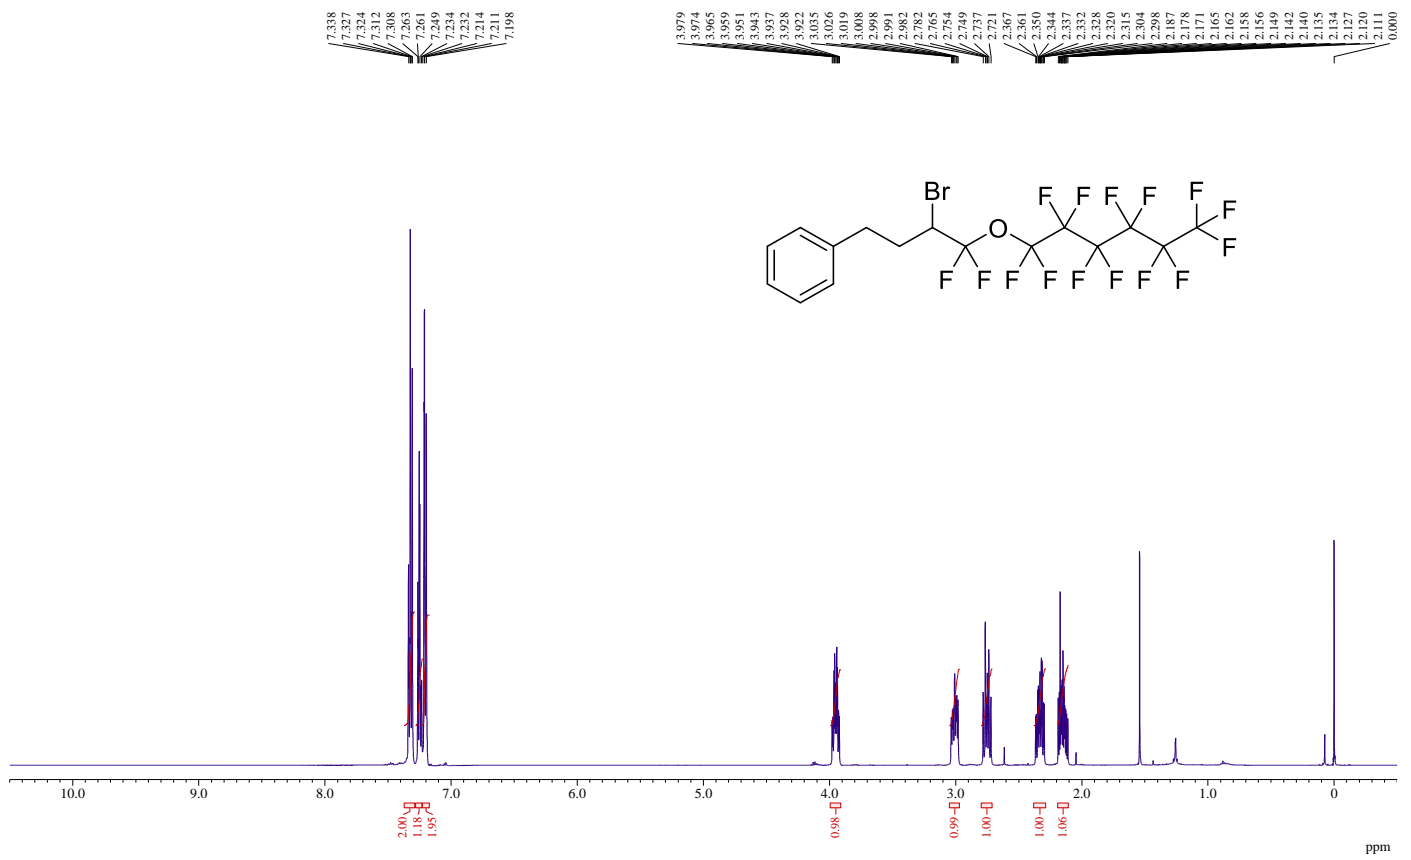

<sup>13</sup>C NMR (126 MHz, CDCl<sub>3</sub>): 4aa

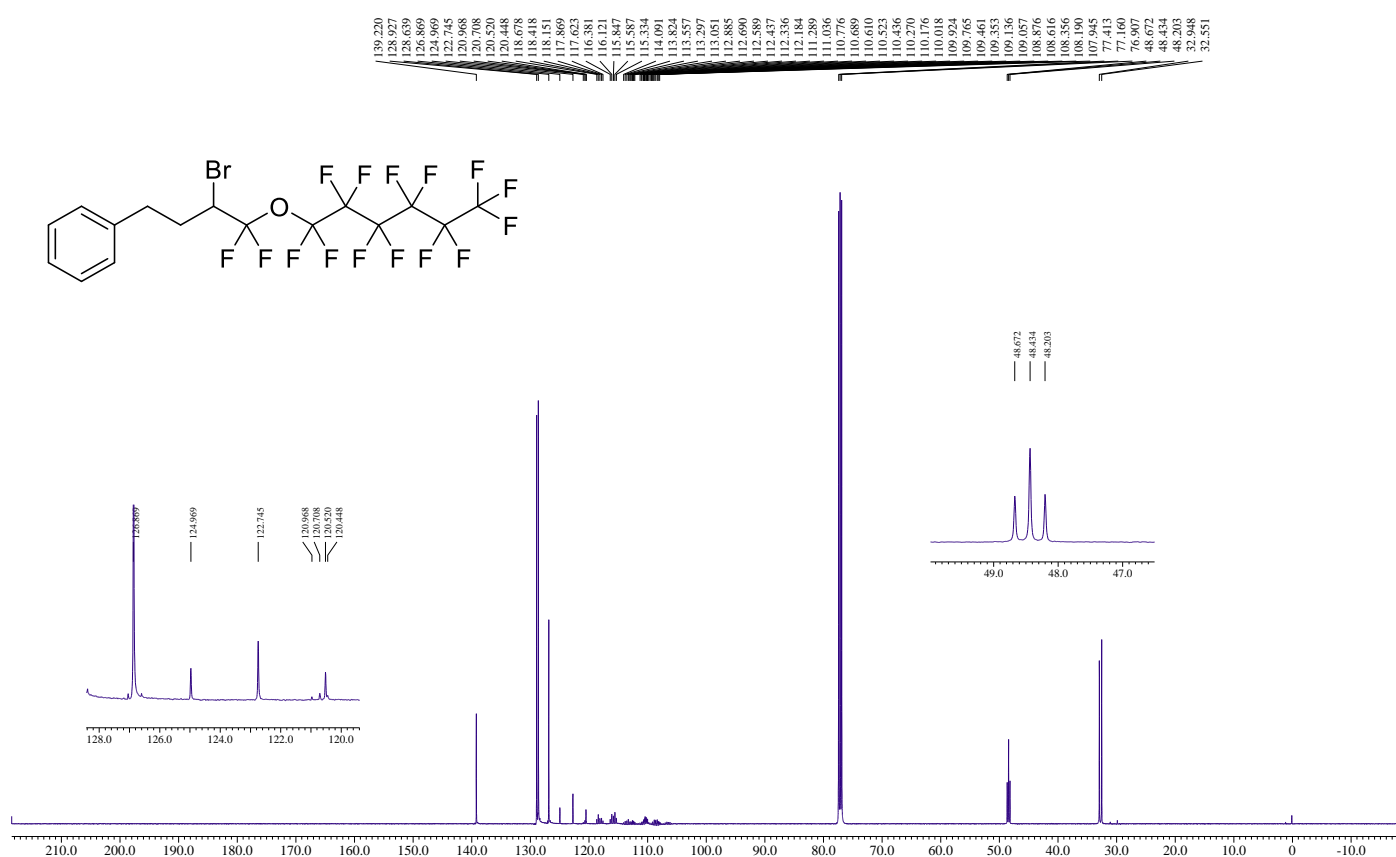

<sup>19</sup>F NMR (282 MHz, CDCl<sub>3</sub>): 4aa

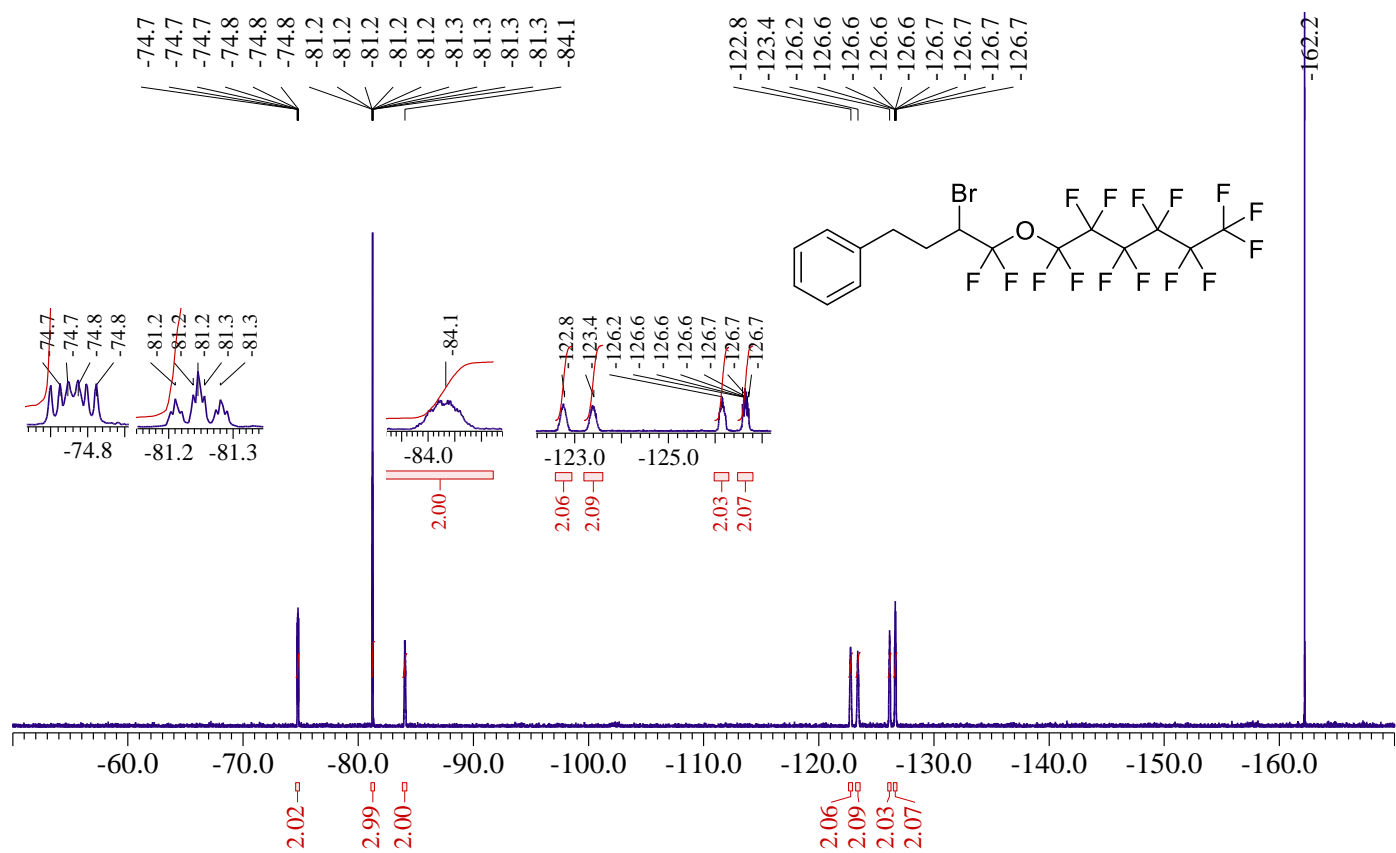

<sup>1</sup>H NMR (500 MHz, CDCl<sub>3</sub>): 4ca

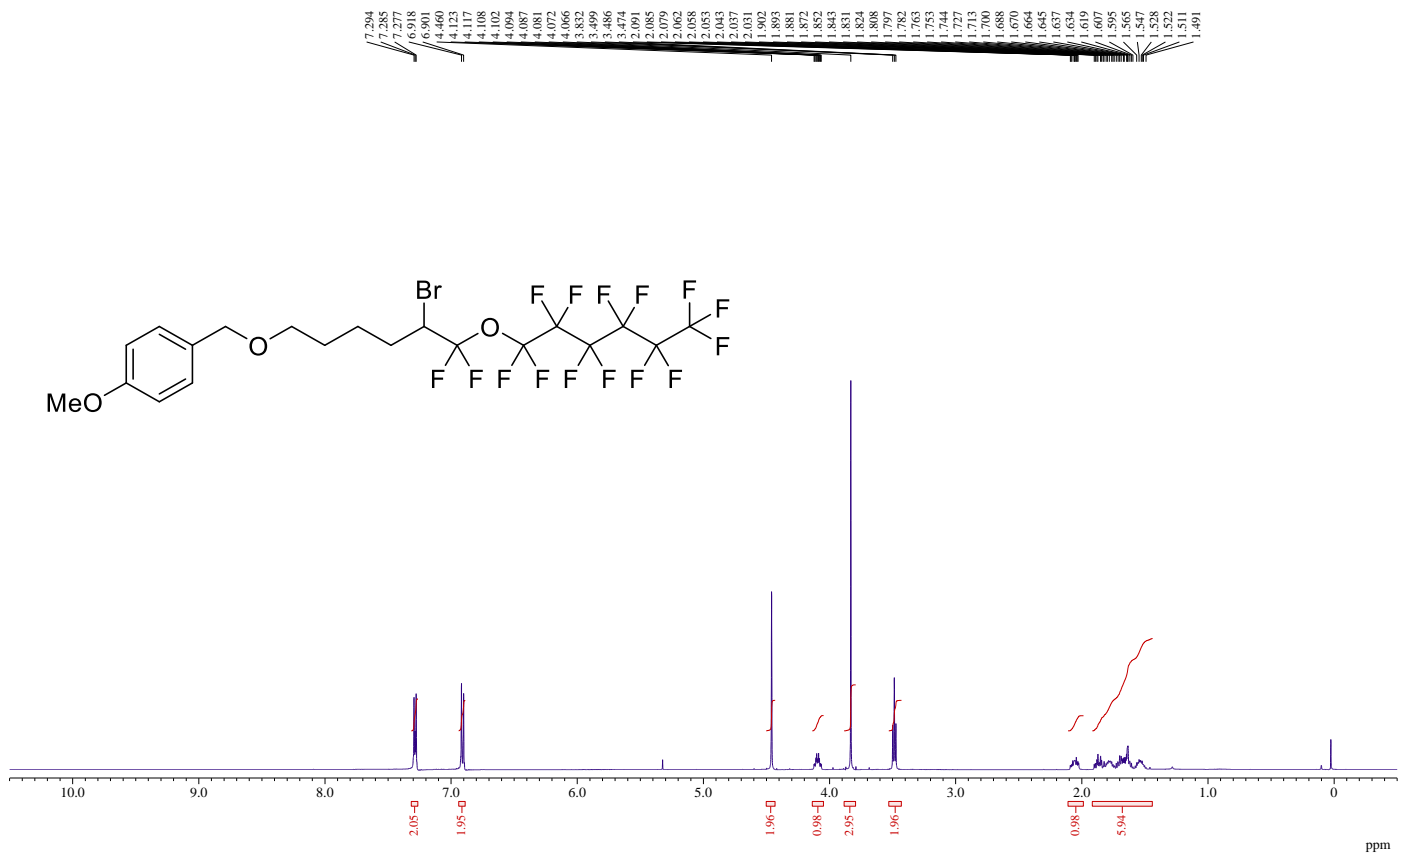

<sup>13</sup>C NMR (126 MHz, CDCl<sub>3</sub>): 4ca

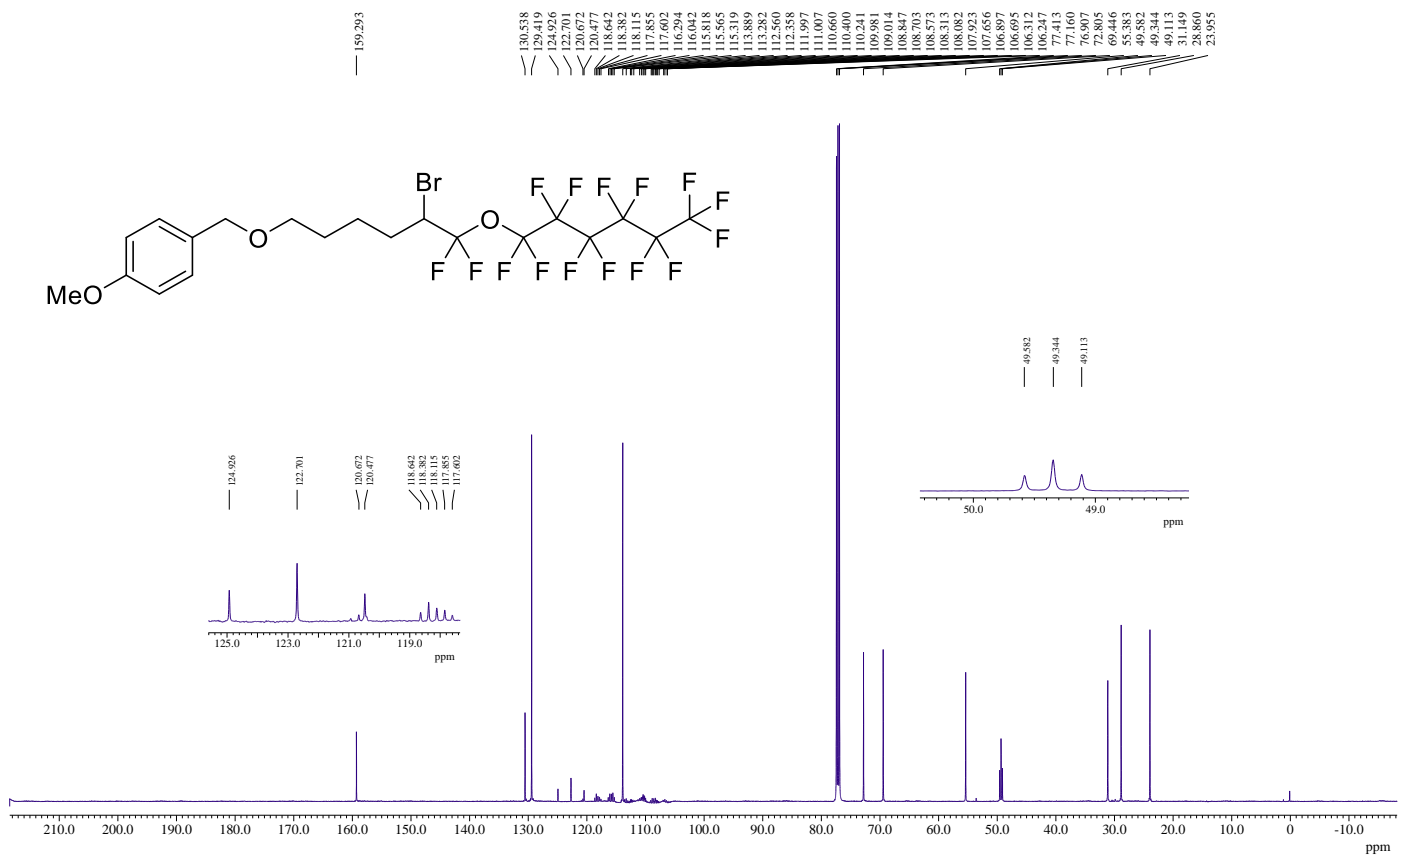

<sup>19</sup>F NMR (282 MHz, CDCl<sub>3</sub>): **4ca**

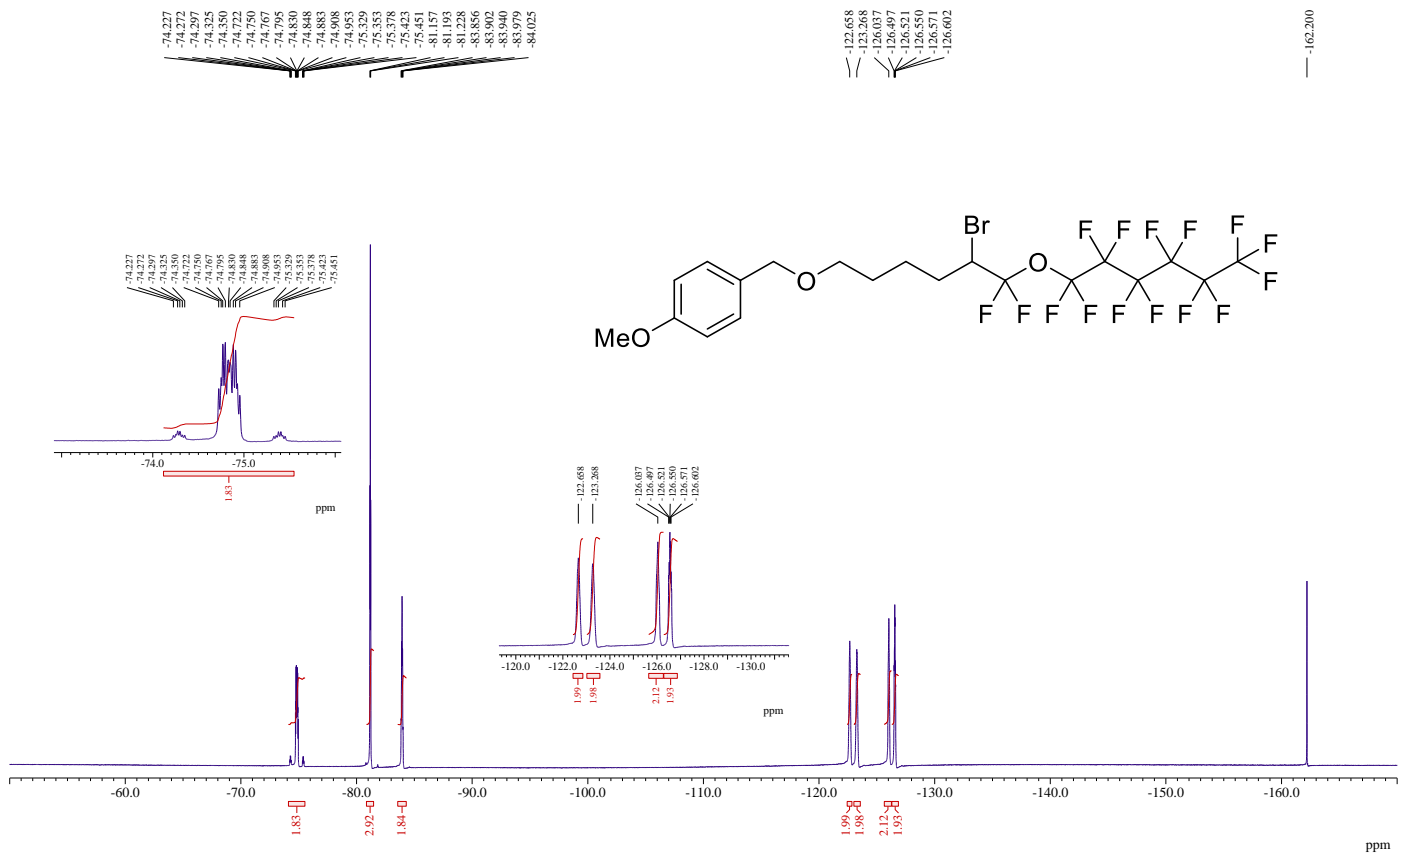

<sup>1</sup>H NMR (500 MHz, CDCl<sub>3</sub>): **4ea**

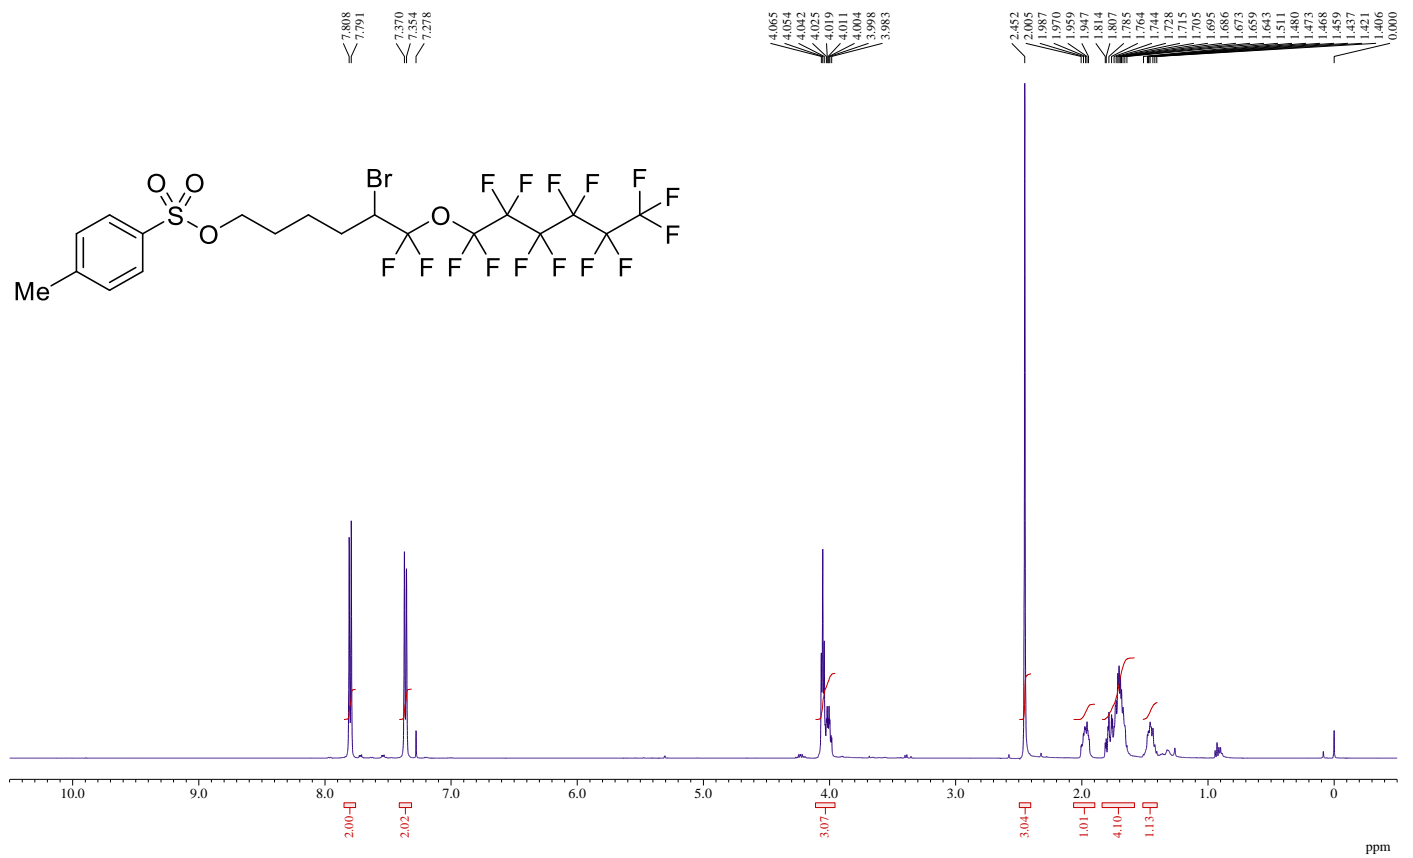



<sup>1</sup>H NMR (500 MHz, CDCl<sub>3</sub>): 4ha

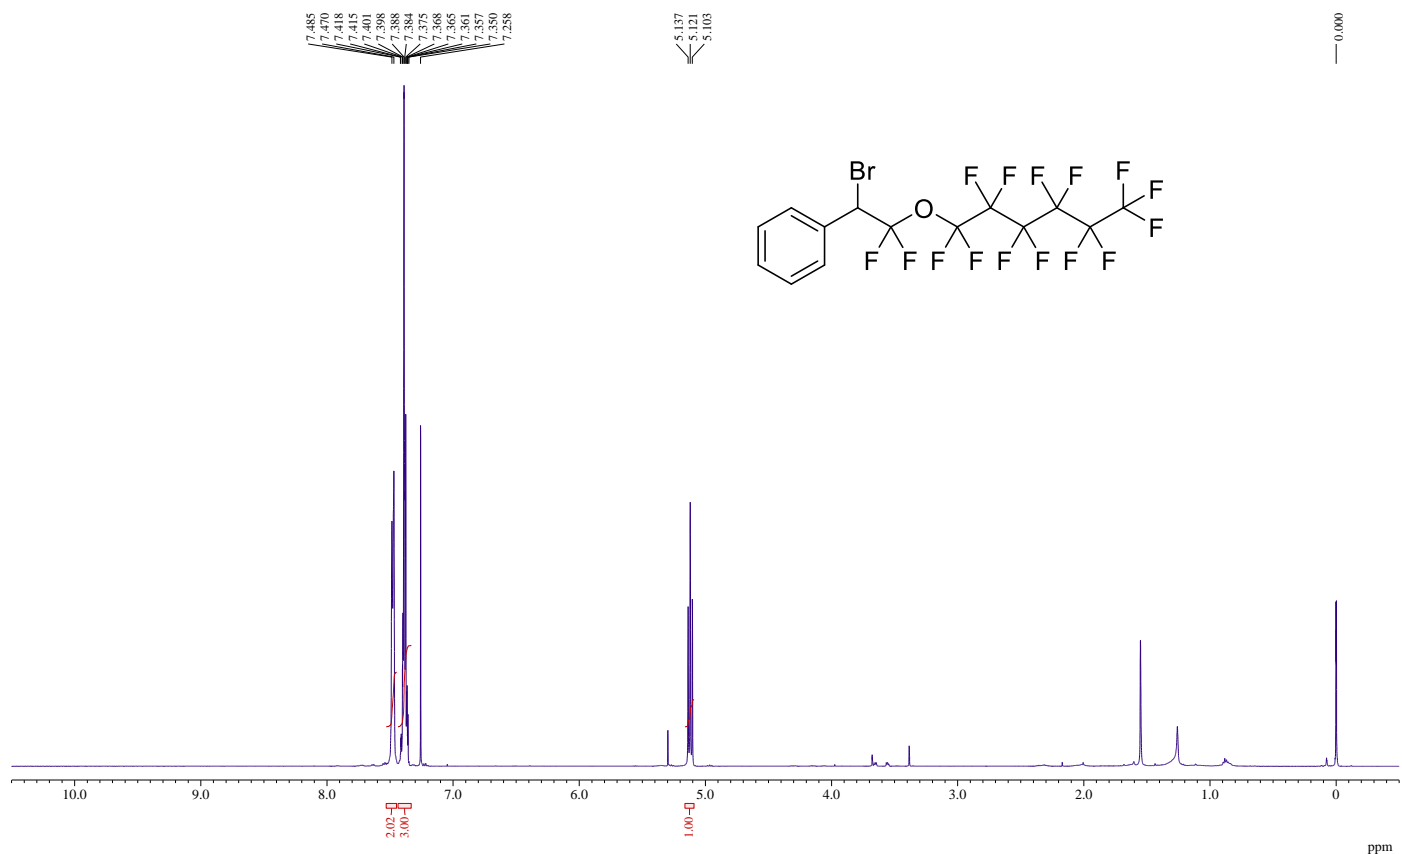

<sup>13</sup>C NMR (126 MHz, CDCl<sub>3</sub>): 4ha

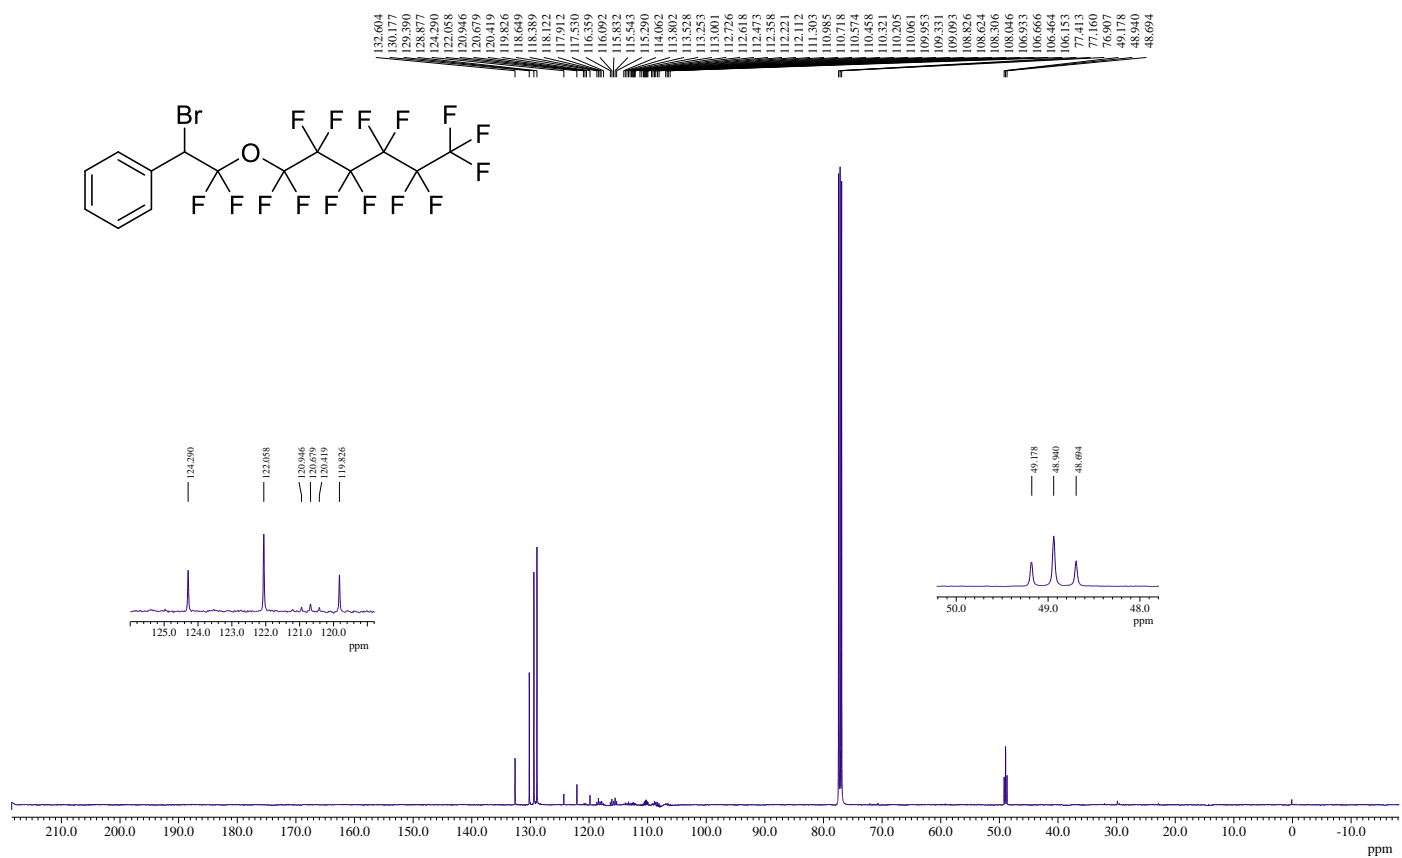

<sup>19</sup>F NMR (282 MHz, CDCl<sub>3</sub>): 4ha

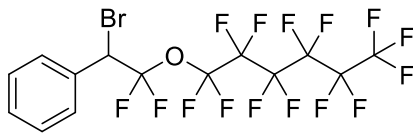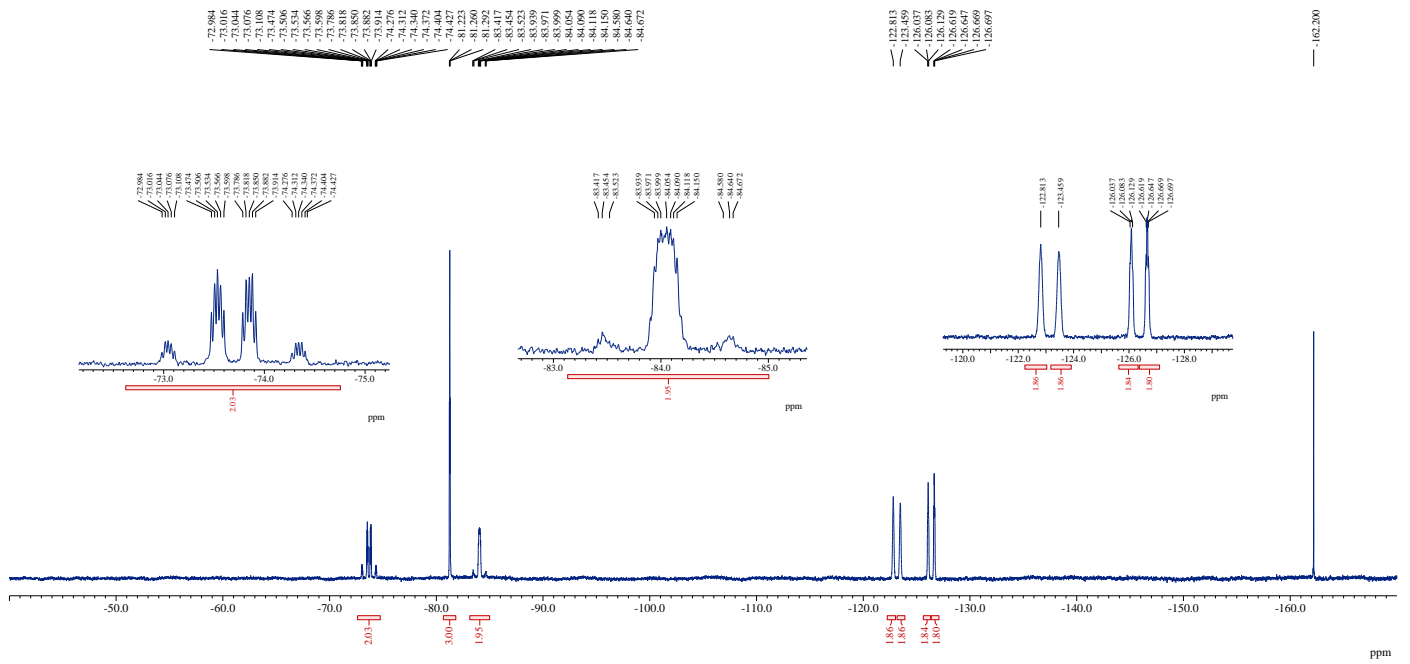

<sup>1</sup>H NMR (500 MHz, CDCl<sub>3</sub>): 4ia

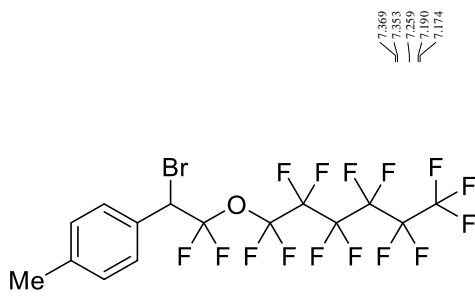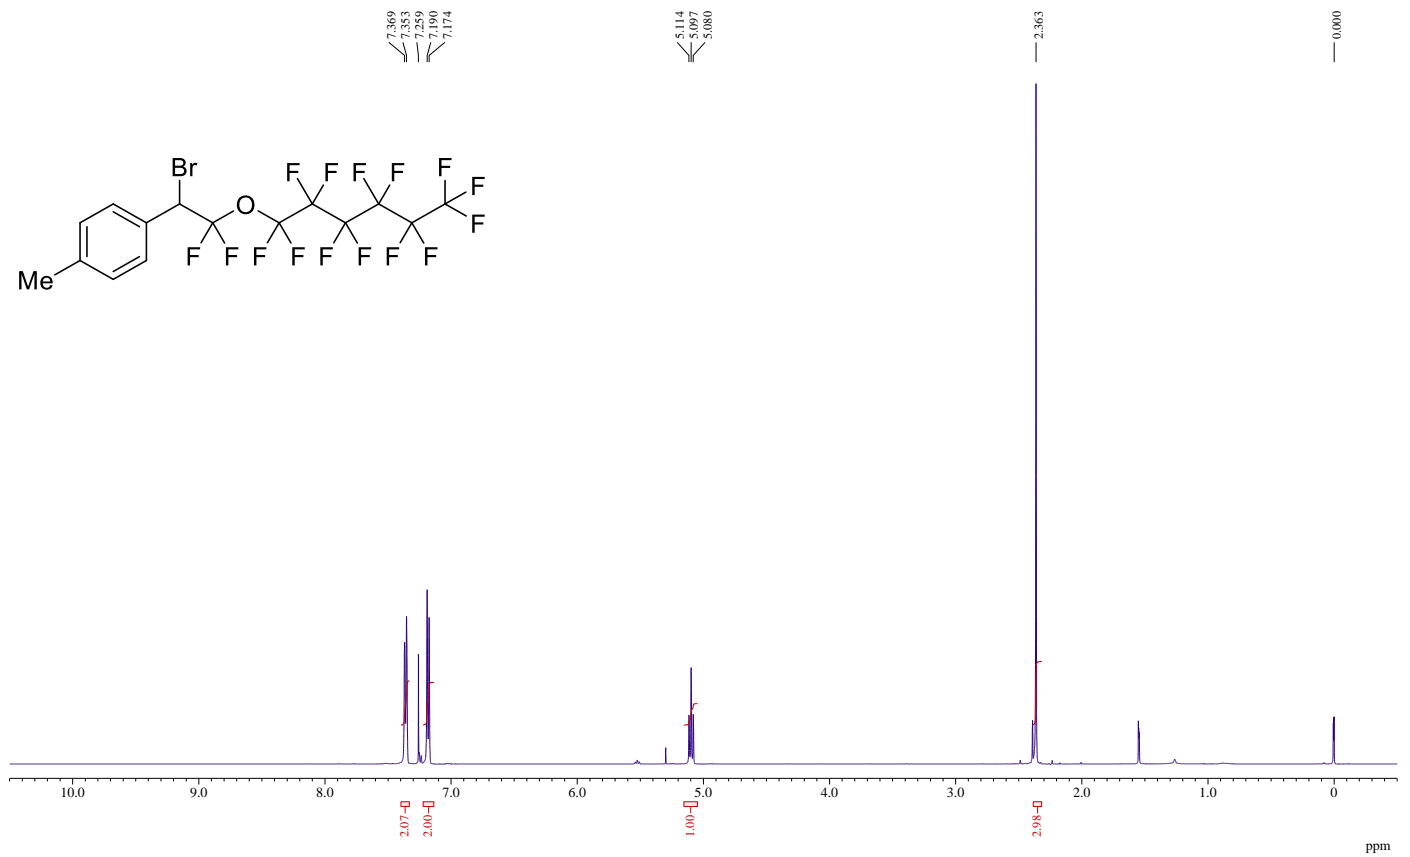





<sup>1</sup>H NMR (500 MHz, CDCl<sub>3</sub>): **4ja**

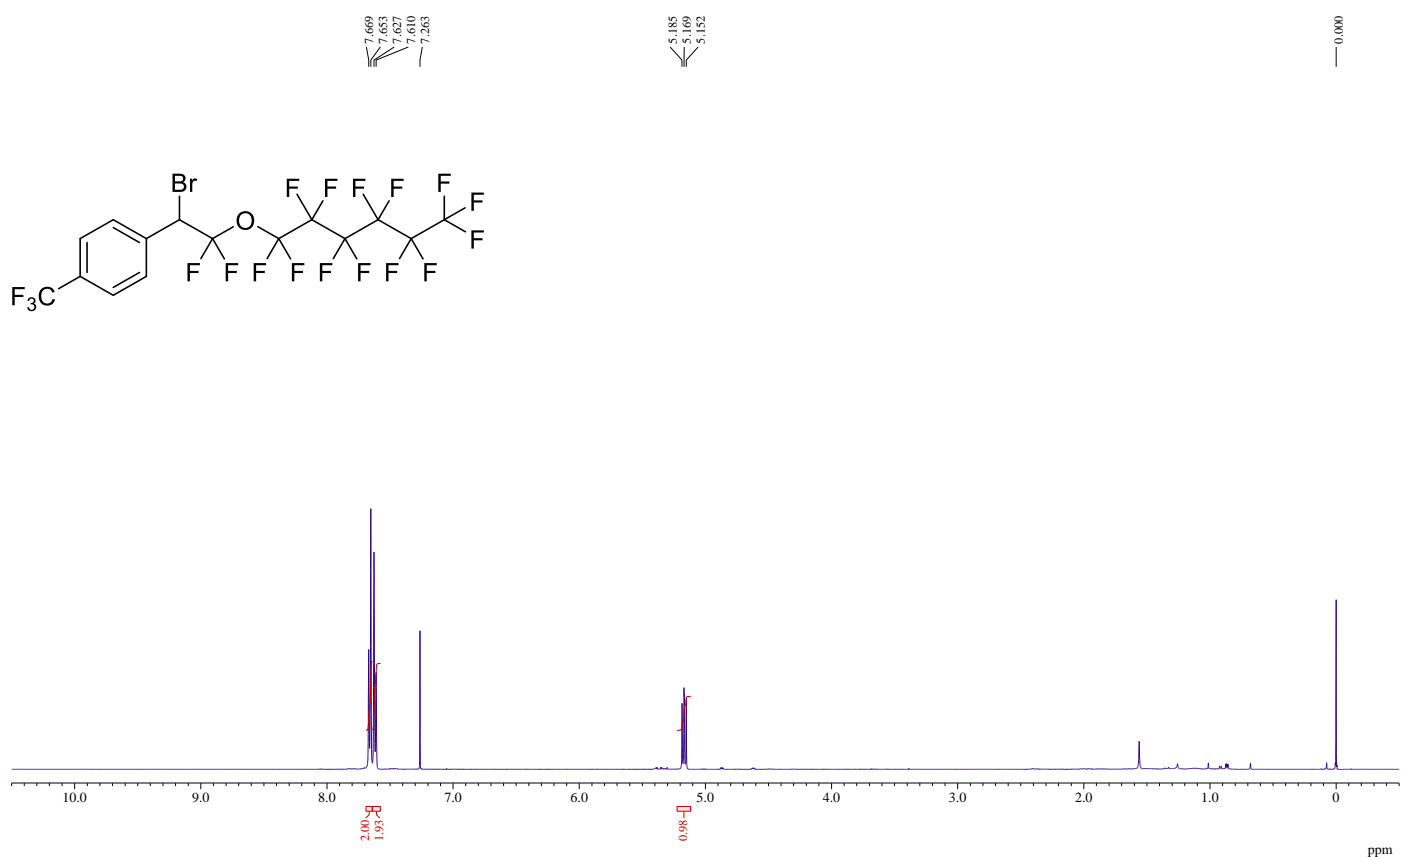

<sup>13</sup>C NMR (126 MHz, CDCl<sub>3</sub>): **4ja**

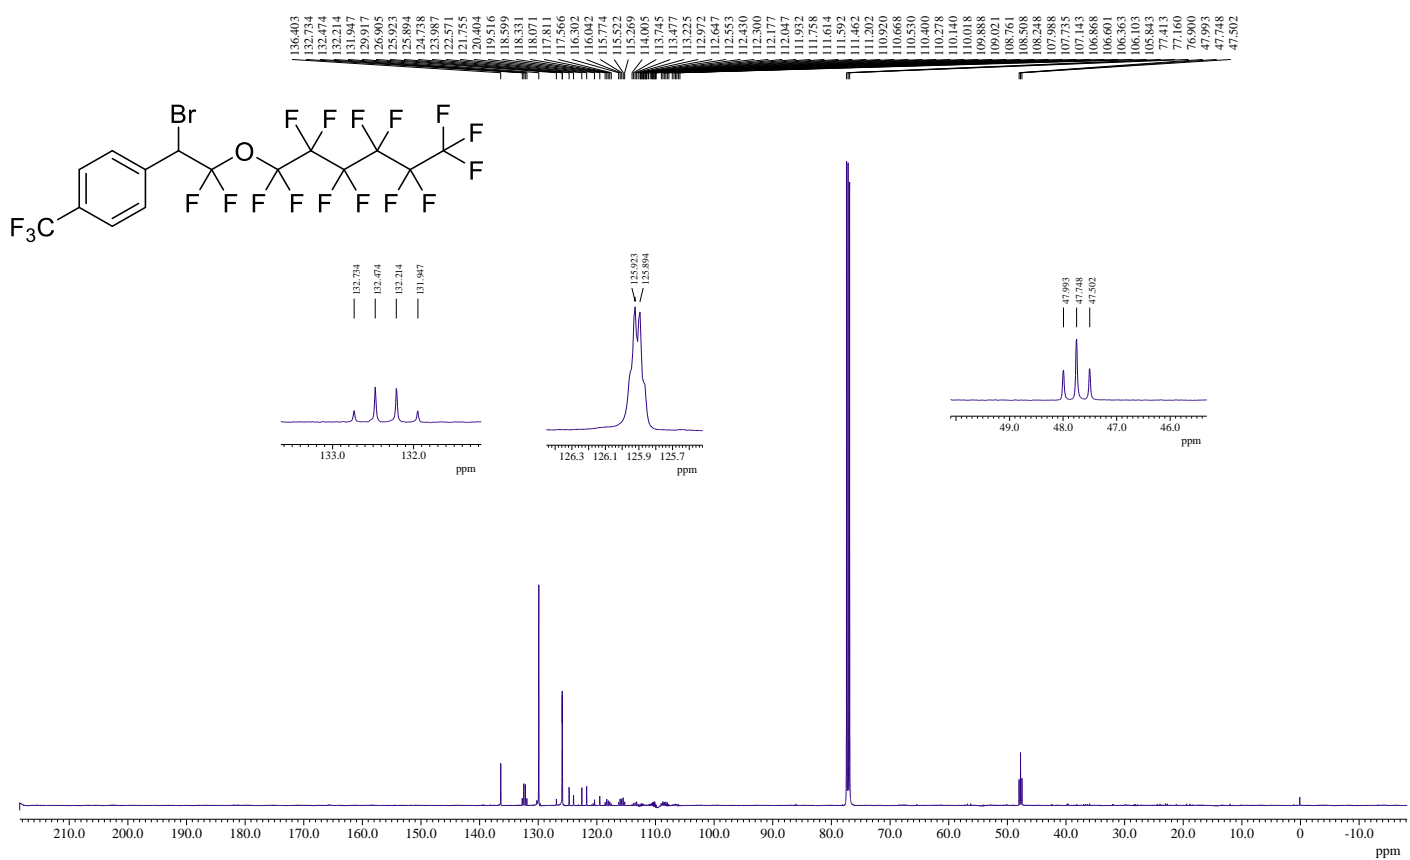

**<sup>19</sup>F NMR (282 MHz, CDCl<sub>3</sub>): 4ja**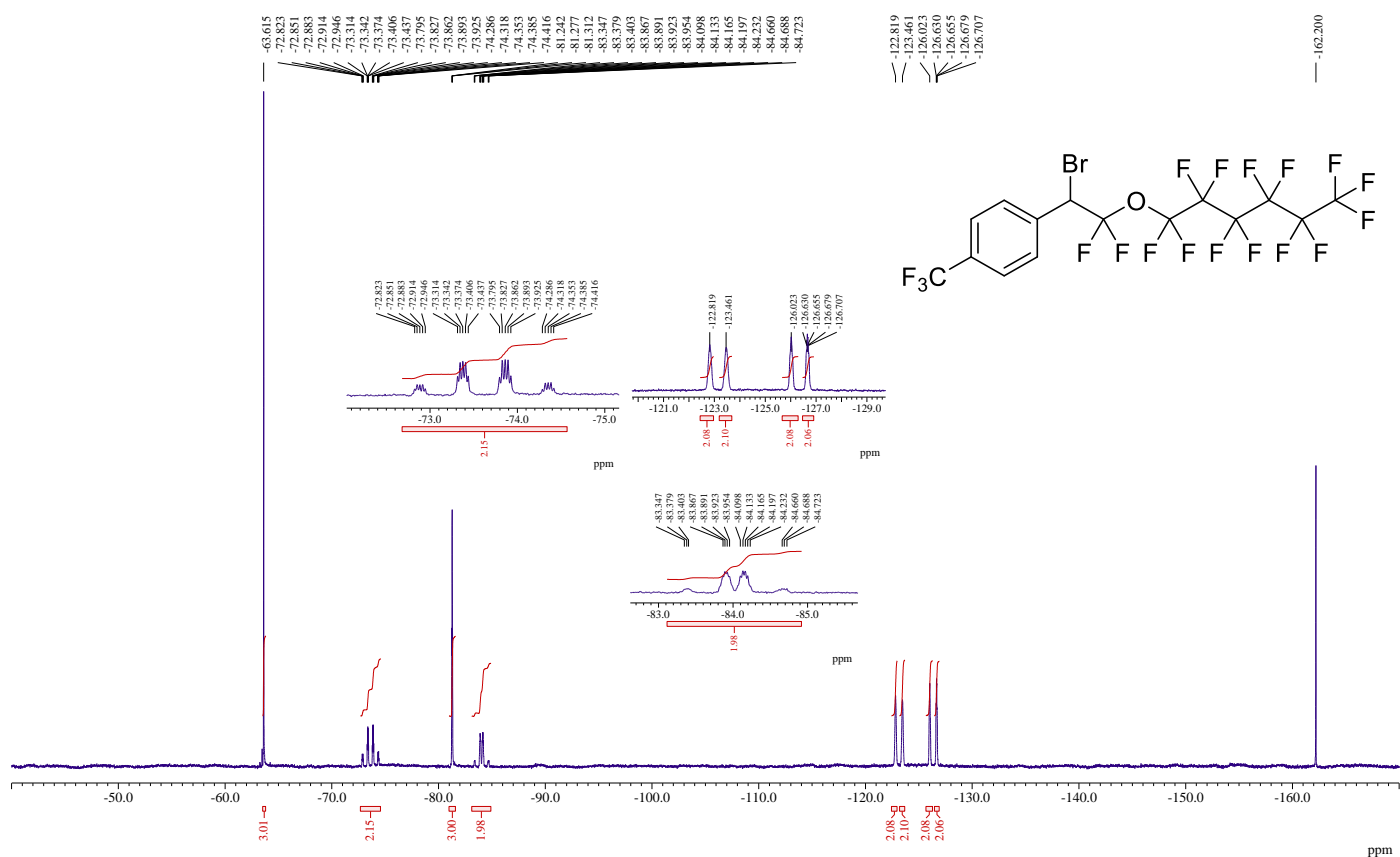**<sup>1</sup>H NMR (500 MHz, CDCl<sub>3</sub>): 4ka**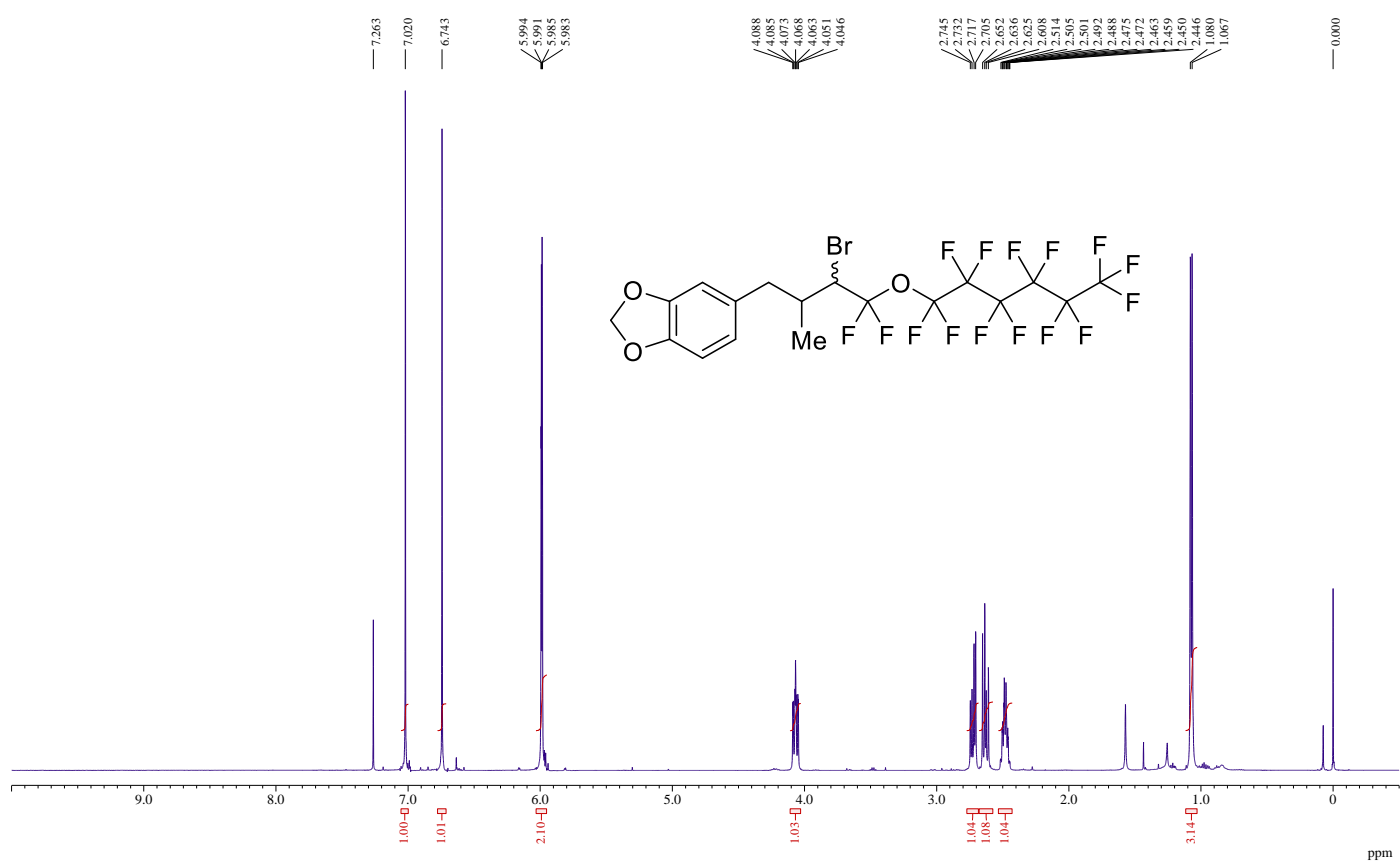



$^1\text{H}$  NMR (500 MHz,  $\text{CDCl}_3$ ): **4la**

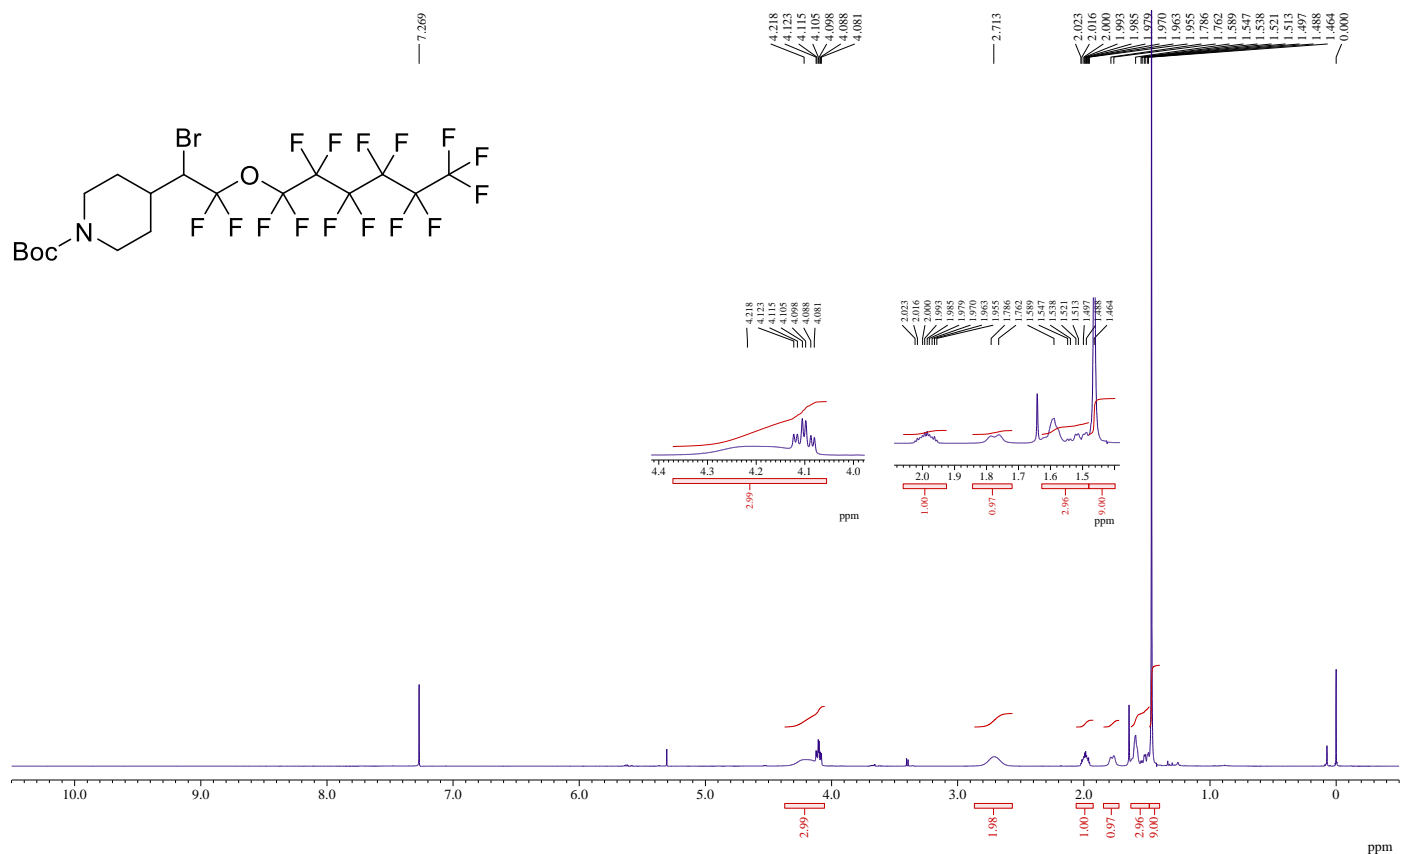

$^{13}\text{C}$  NMR (126 MHz,  $\text{CDCl}_3$ ): **4la**

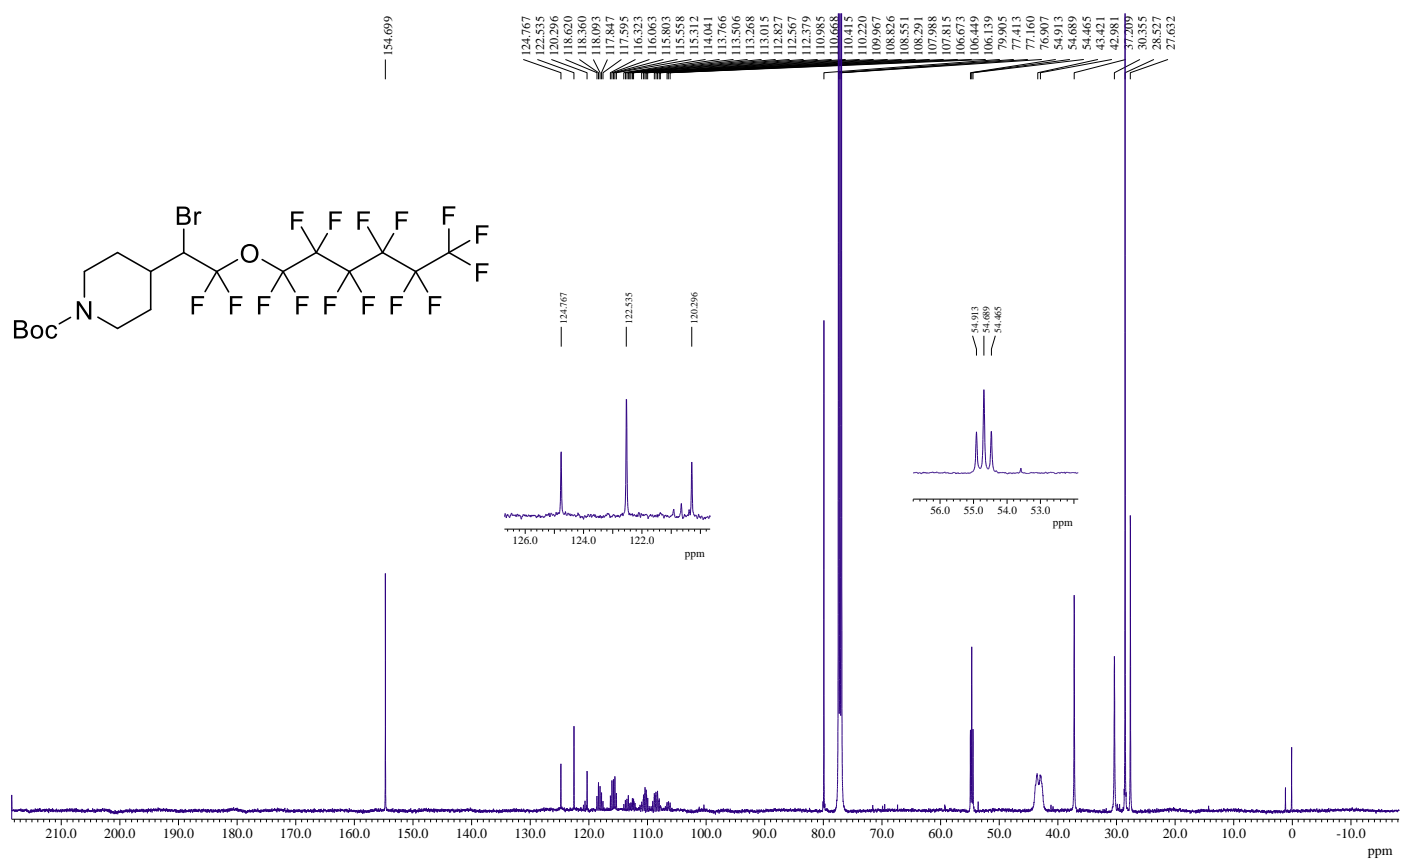

**<sup>19</sup>F NMR (282 MHz, CDCl<sub>3</sub>): 41a**

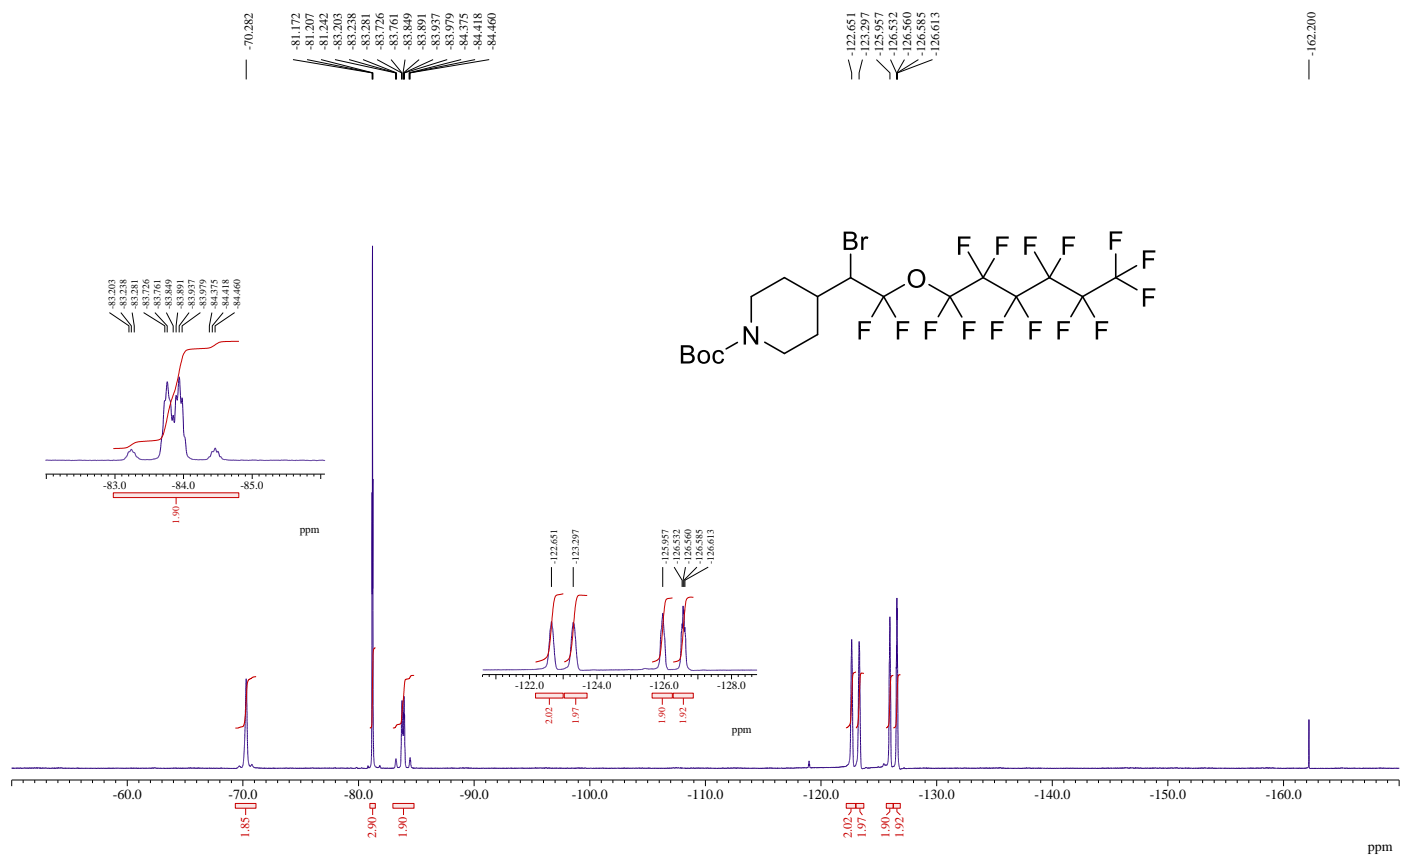

**<sup>1</sup>H NMR (500 MHz, CDCl<sub>3</sub>): 4ma**

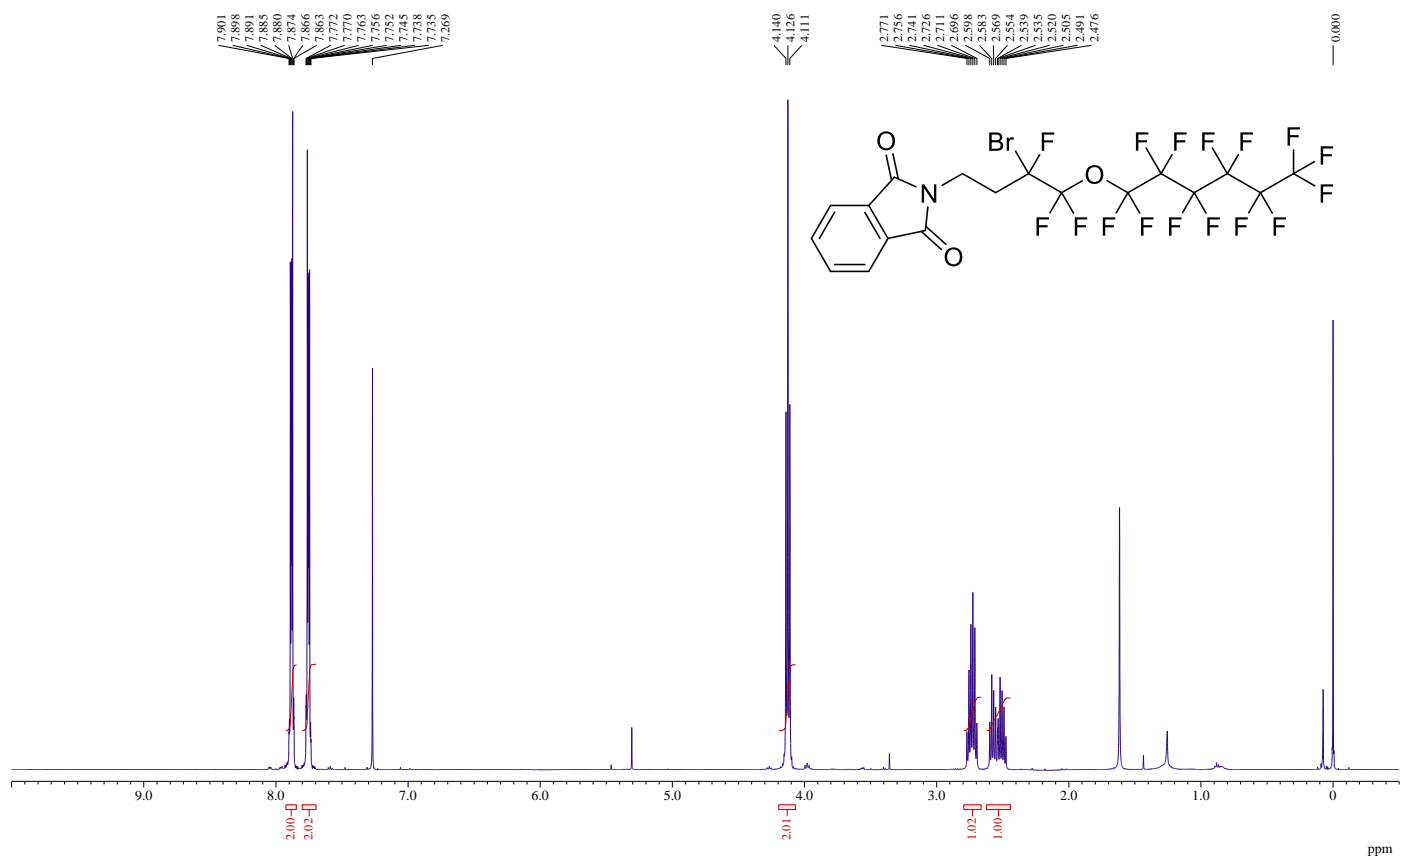

<sup>13</sup>C NMR (126 MHz, CDCl<sub>3</sub>): **4ma**

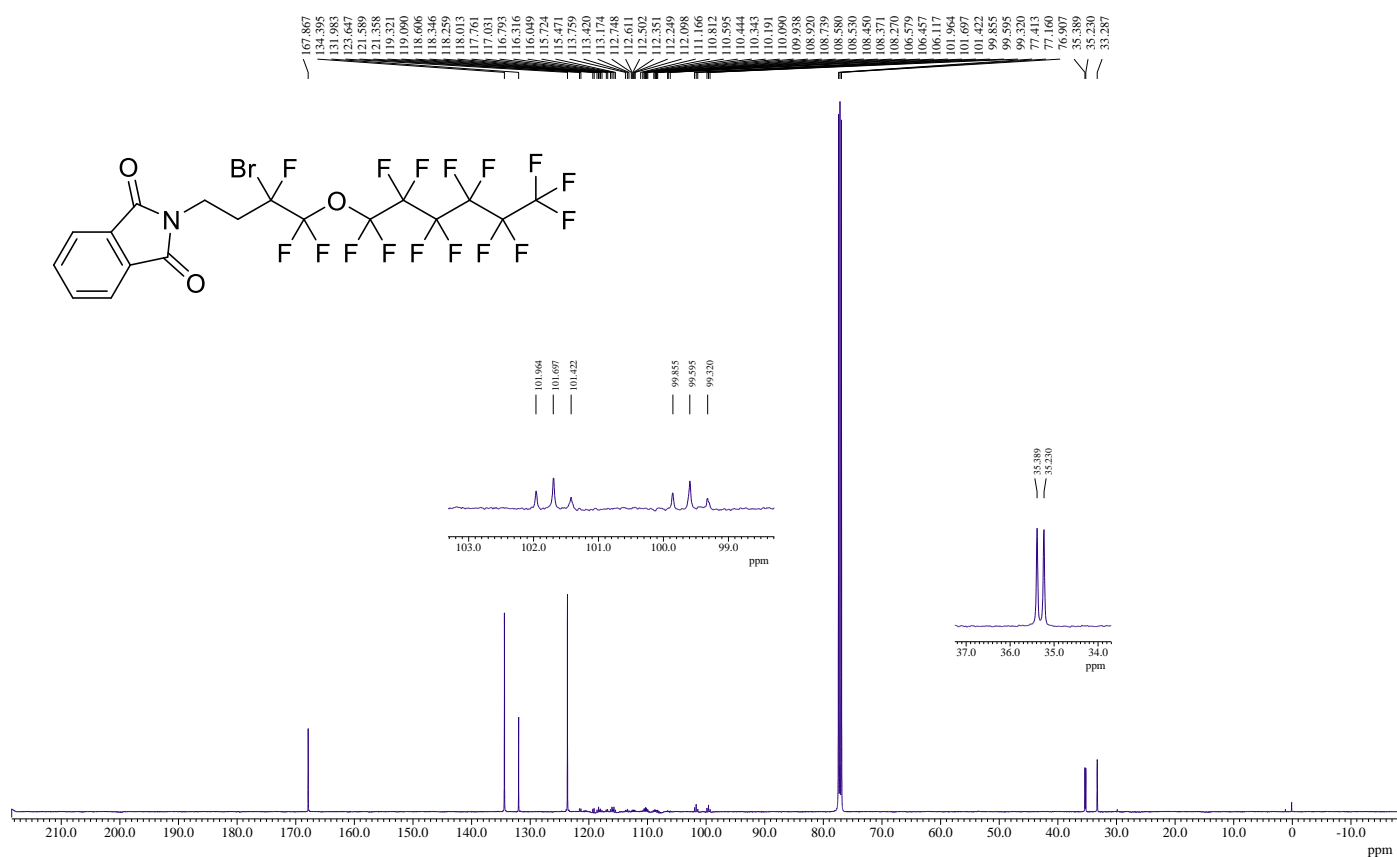

<sup>19</sup>F NMR (282 MHz, CDCl<sub>3</sub>): **4ma**

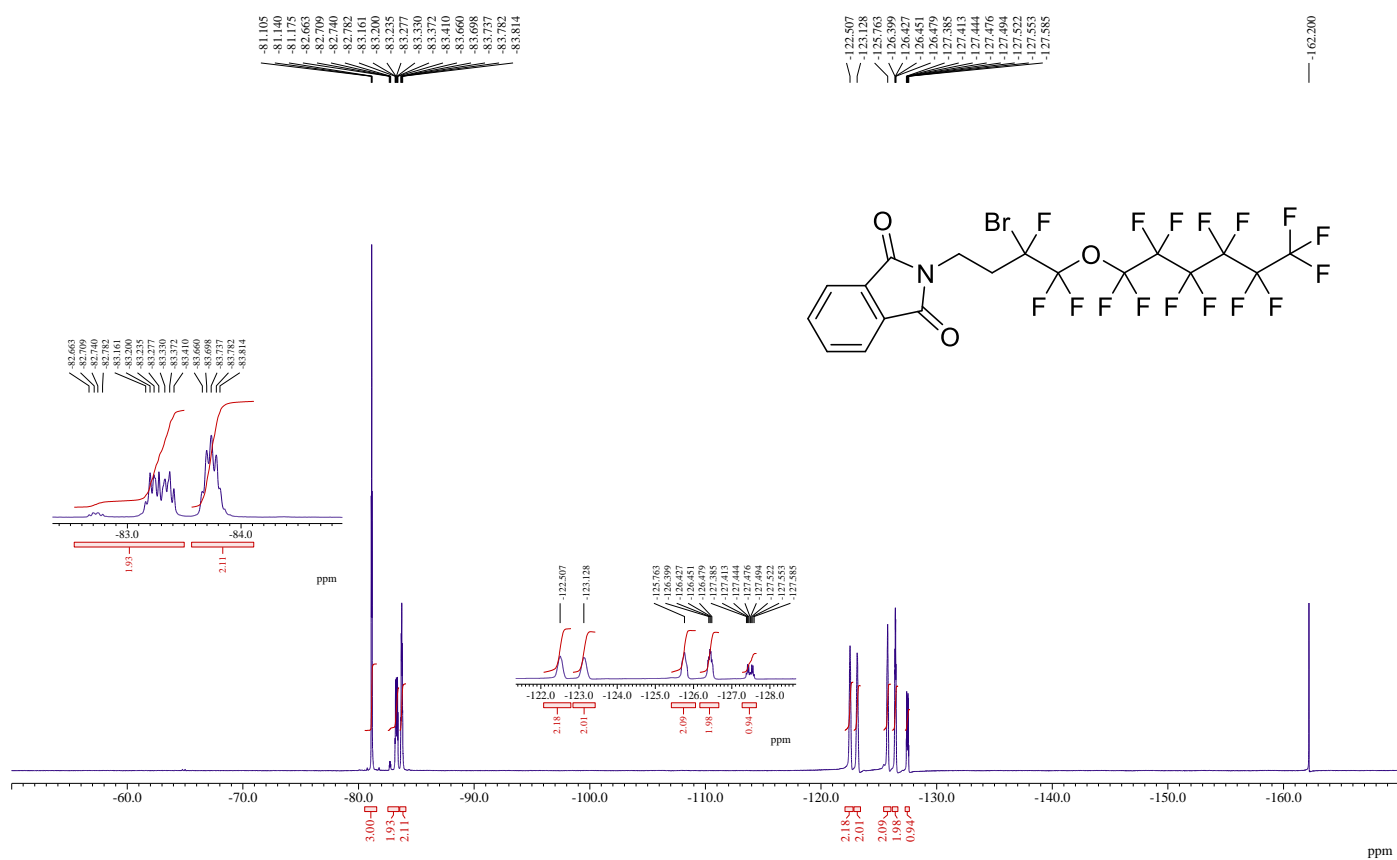

<sup>1</sup>H NMR (500 MHz, CDCl<sub>3</sub>): 4sa

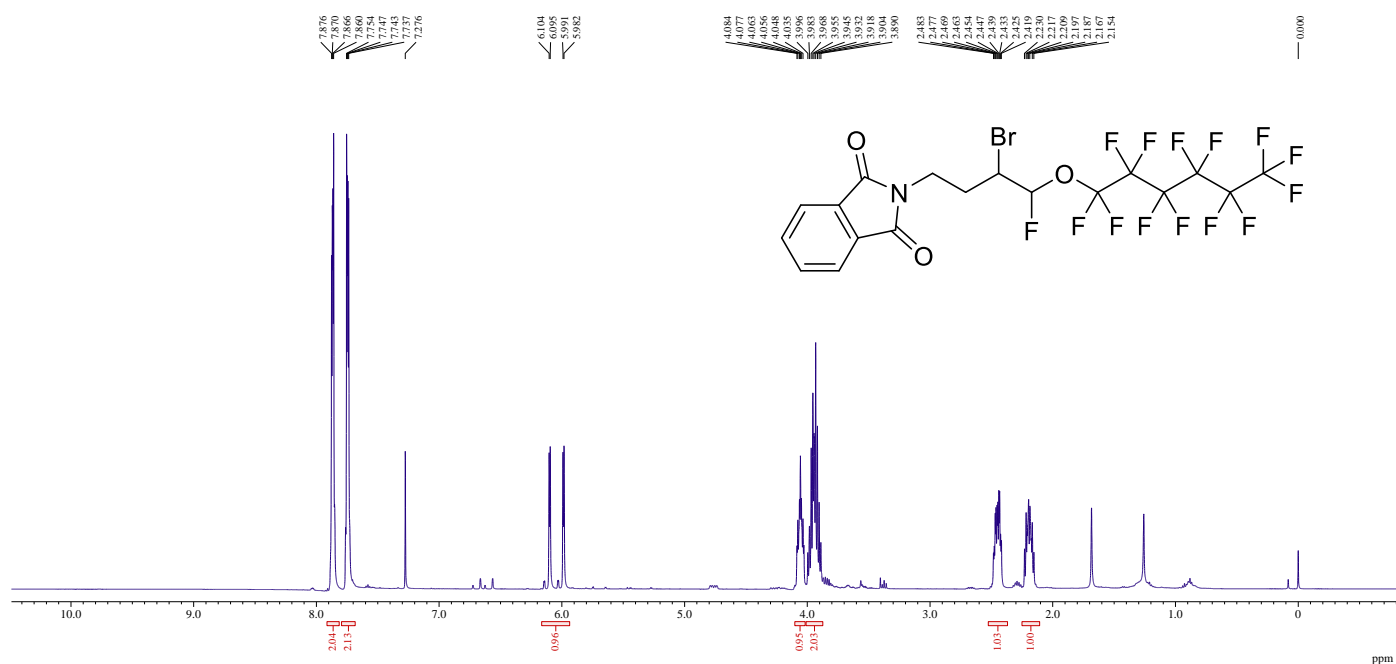

<sup>13</sup>C NMR (126 MHz, CDCl<sub>3</sub>): 4sa

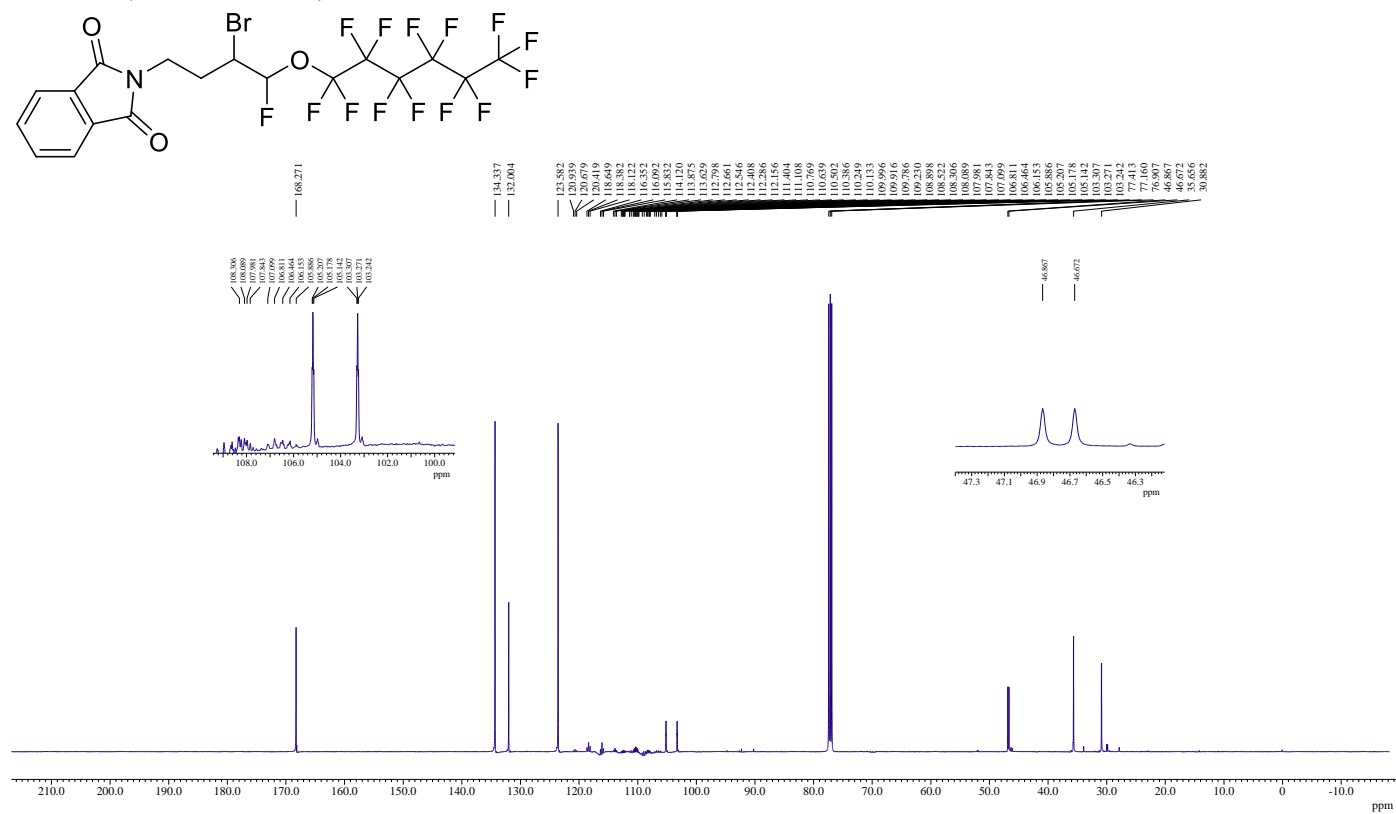

**<sup>19</sup>F NMR (282 MHz, CDCl<sub>3</sub>): 4sa**

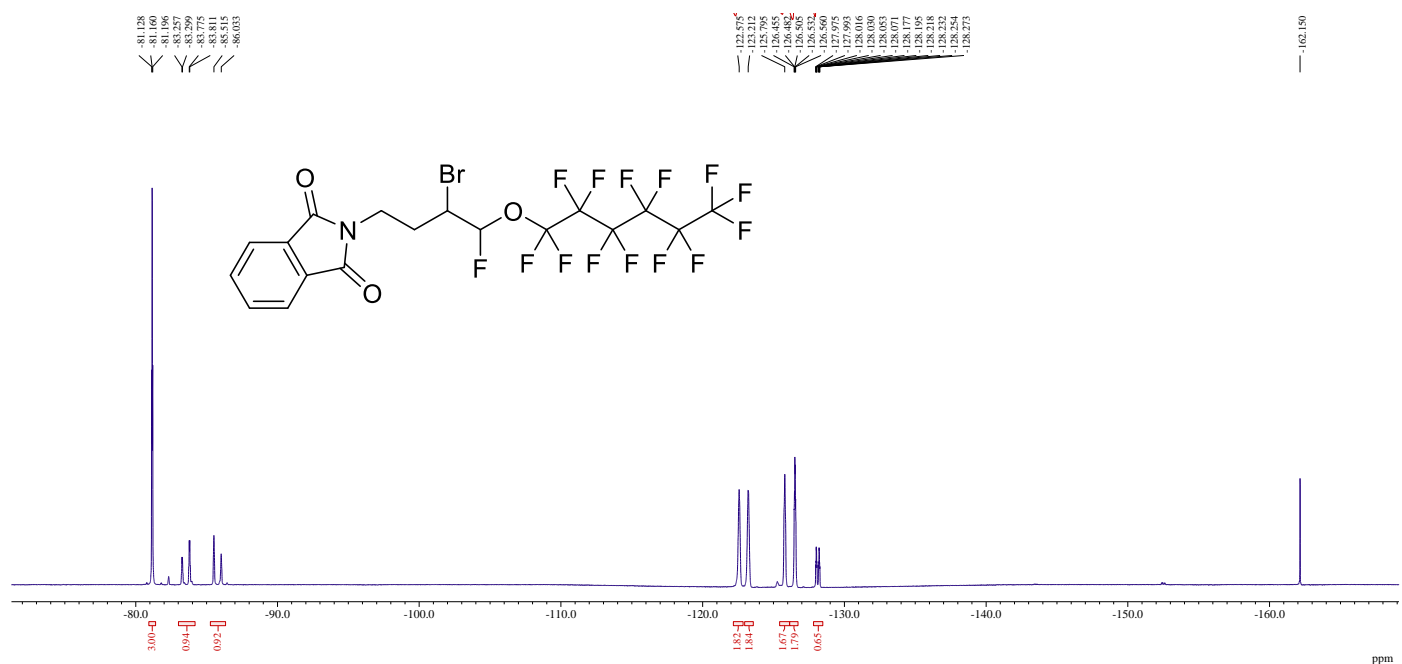

**<sup>1</sup>H NMR (500 MHz, CDCl<sub>3</sub>): 4ta**

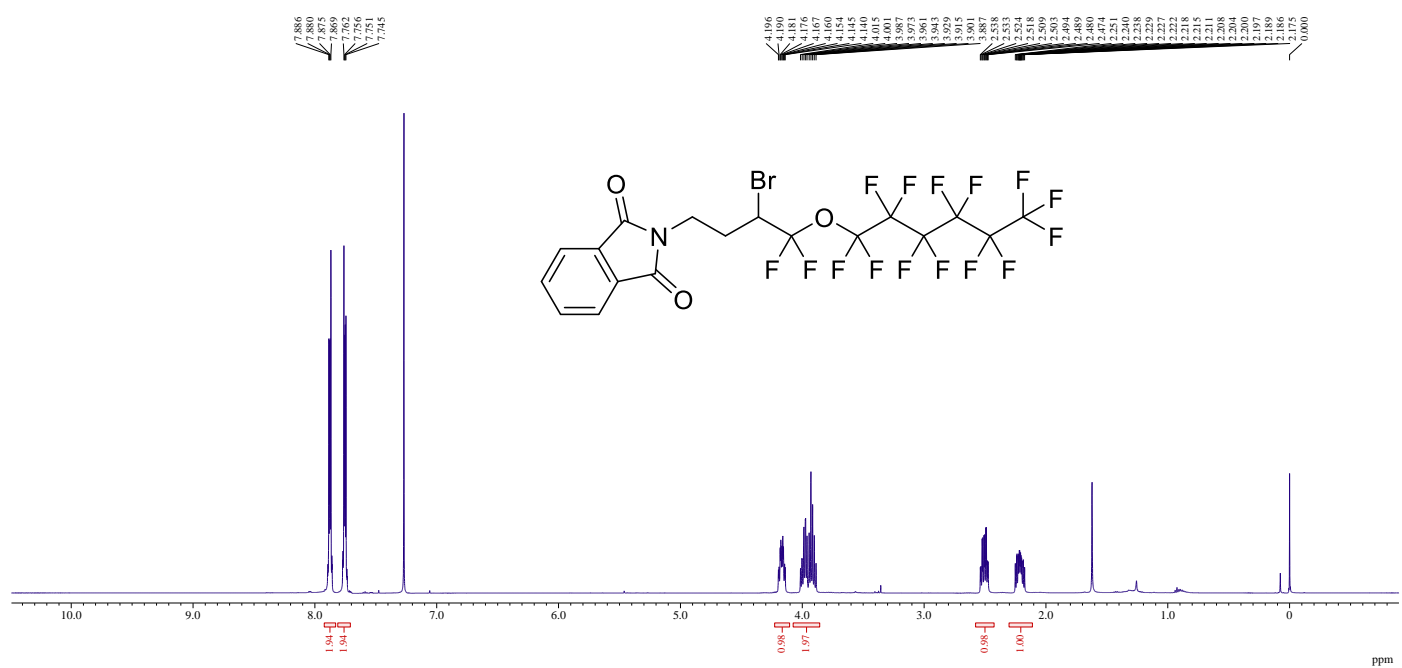



<sup>13</sup>C NMR (126 MHz, CDCl<sub>3</sub>): **4ta**

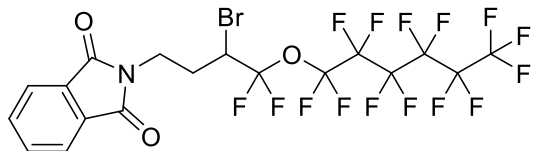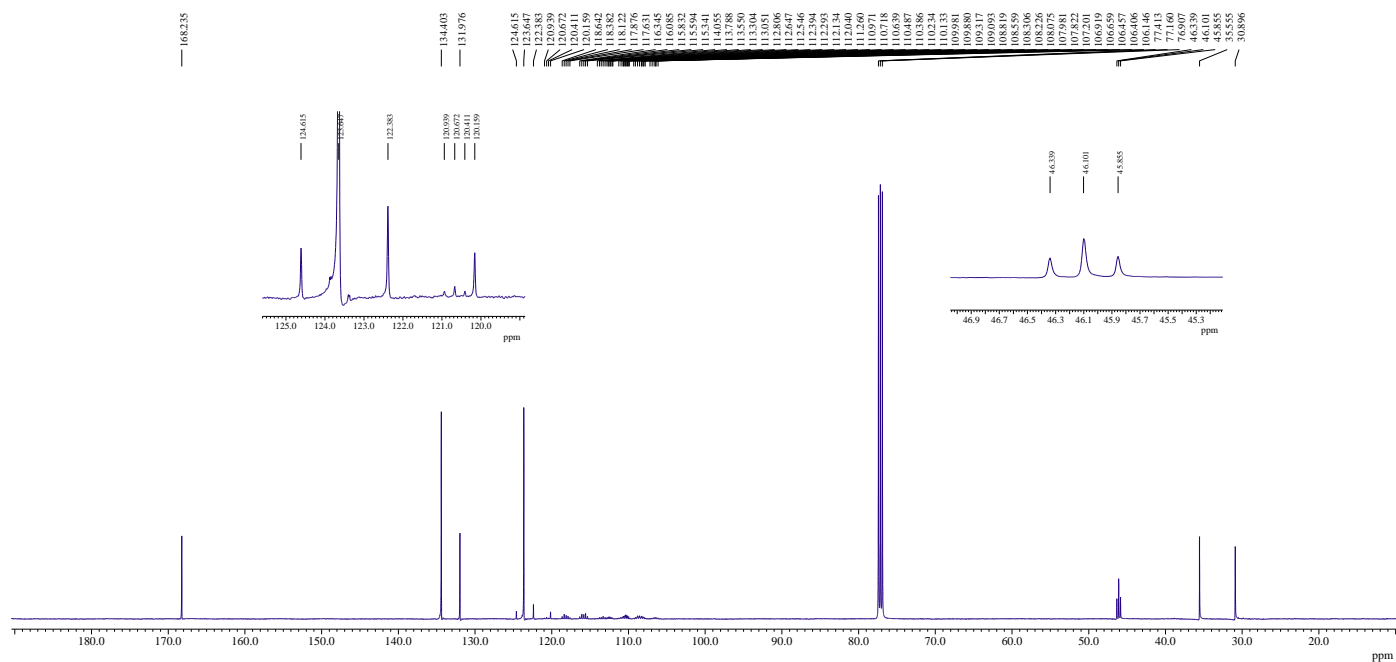

<sup>19</sup>F NMR (282 MHz, CDCl<sub>3</sub>): **4ta**

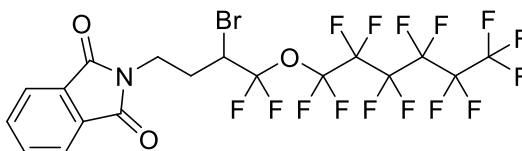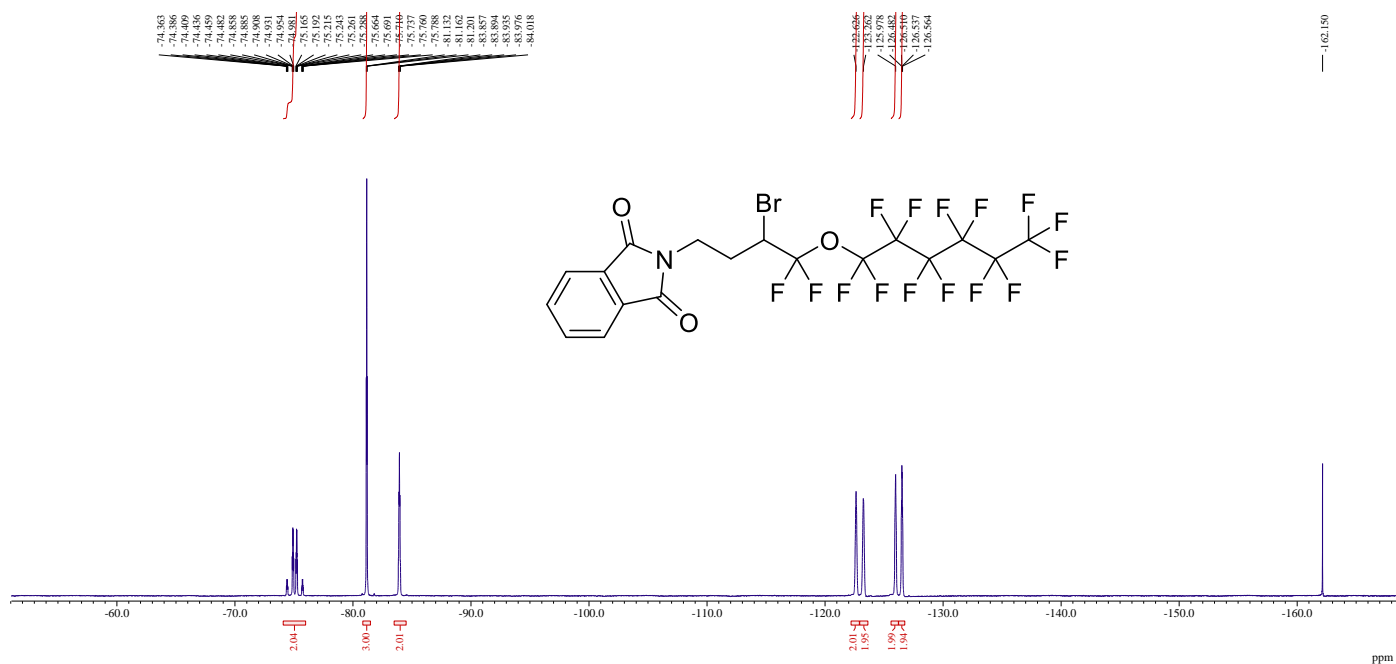

<sup>1</sup>H NMR (500 MHz, CDCl<sub>3</sub>): **4ab**

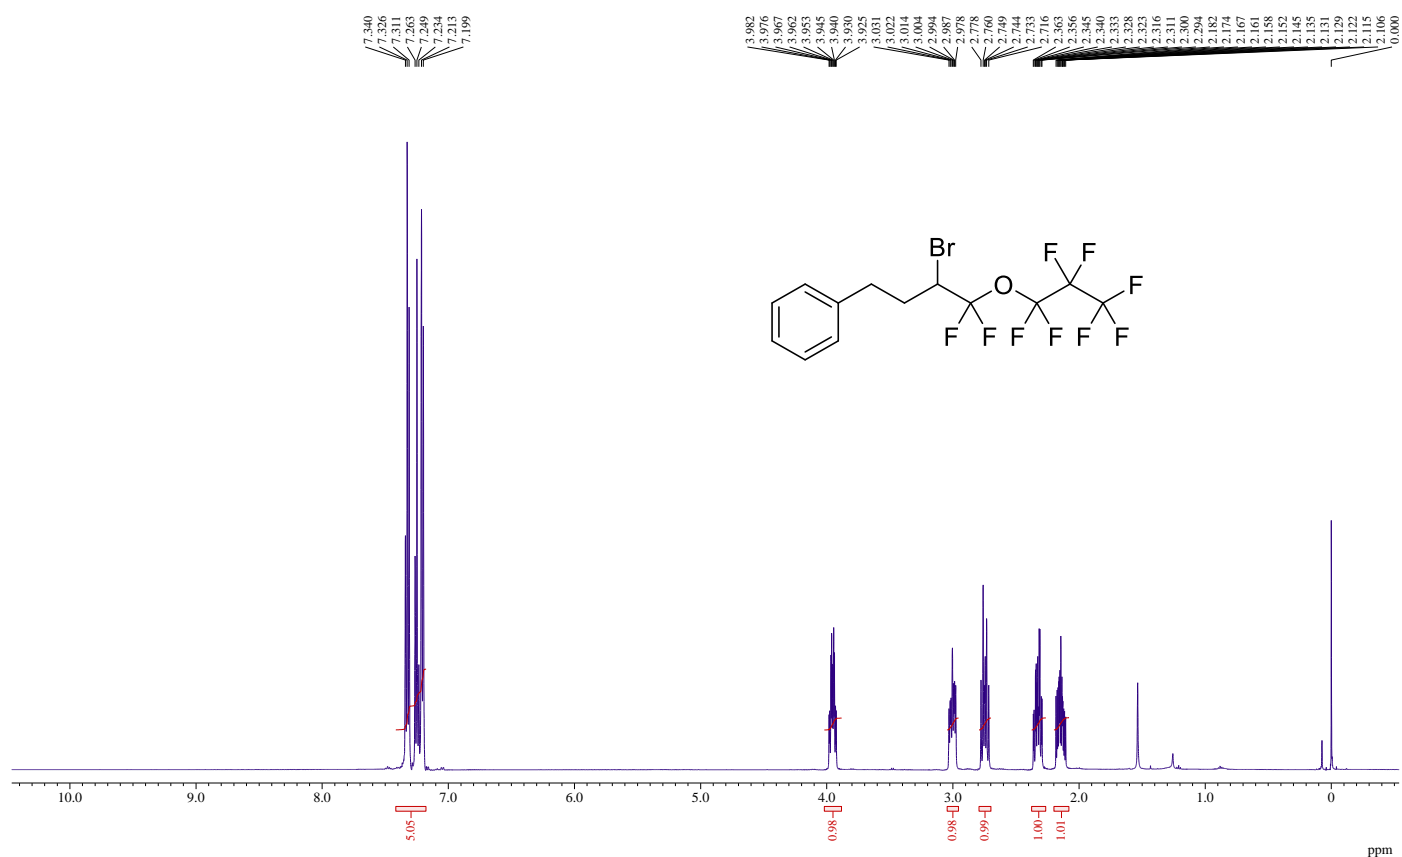

<sup>13</sup>C NMR (126 MHz, CDCl<sub>3</sub>): **4ab**

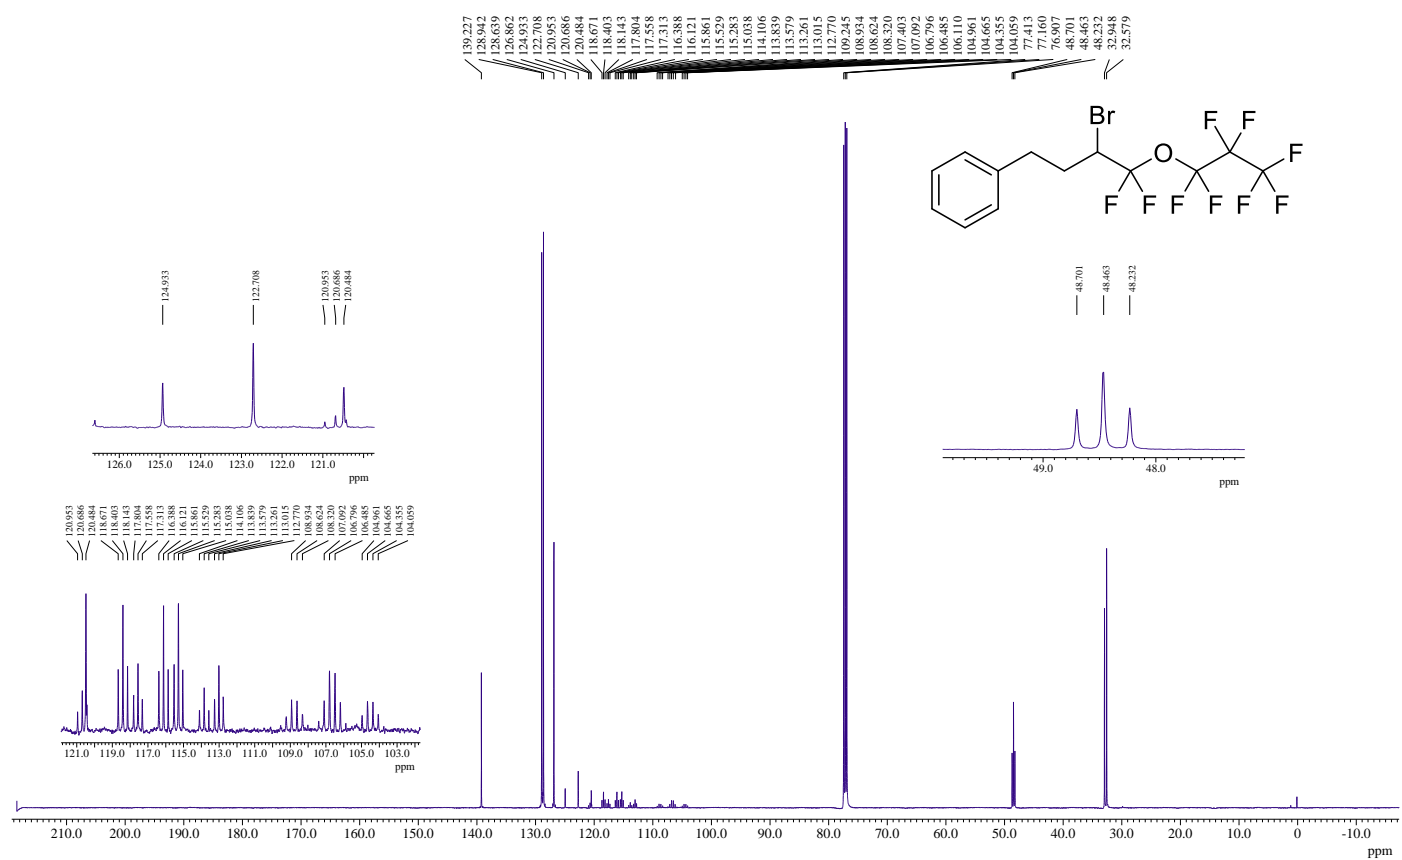

**<sup>19</sup>F NMR (282 MHz, CDCl<sub>3</sub>): 4ab**

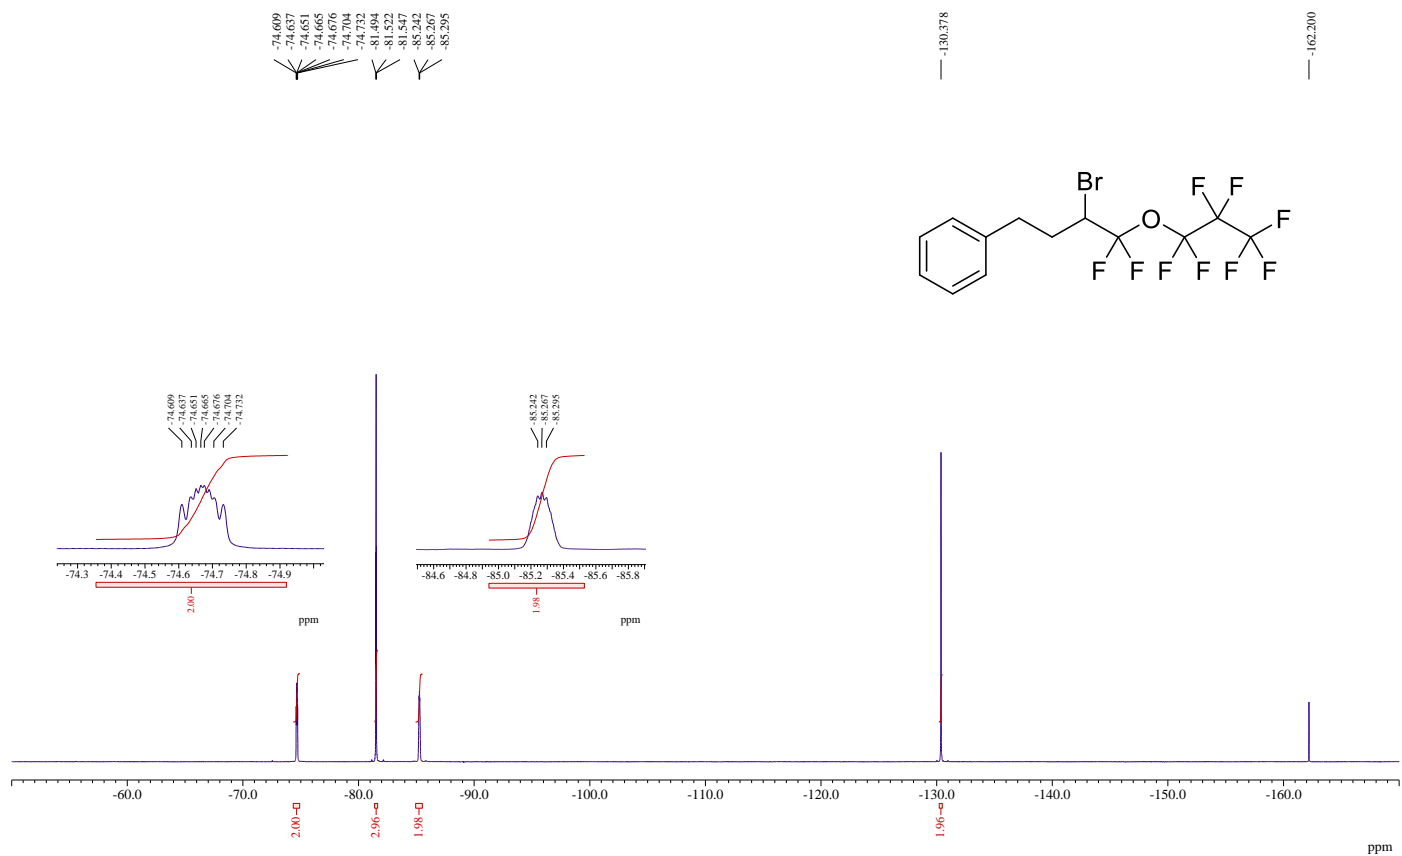

**<sup>1</sup>H NMR (500 MHz, CDCl<sub>3</sub>): 4ac**

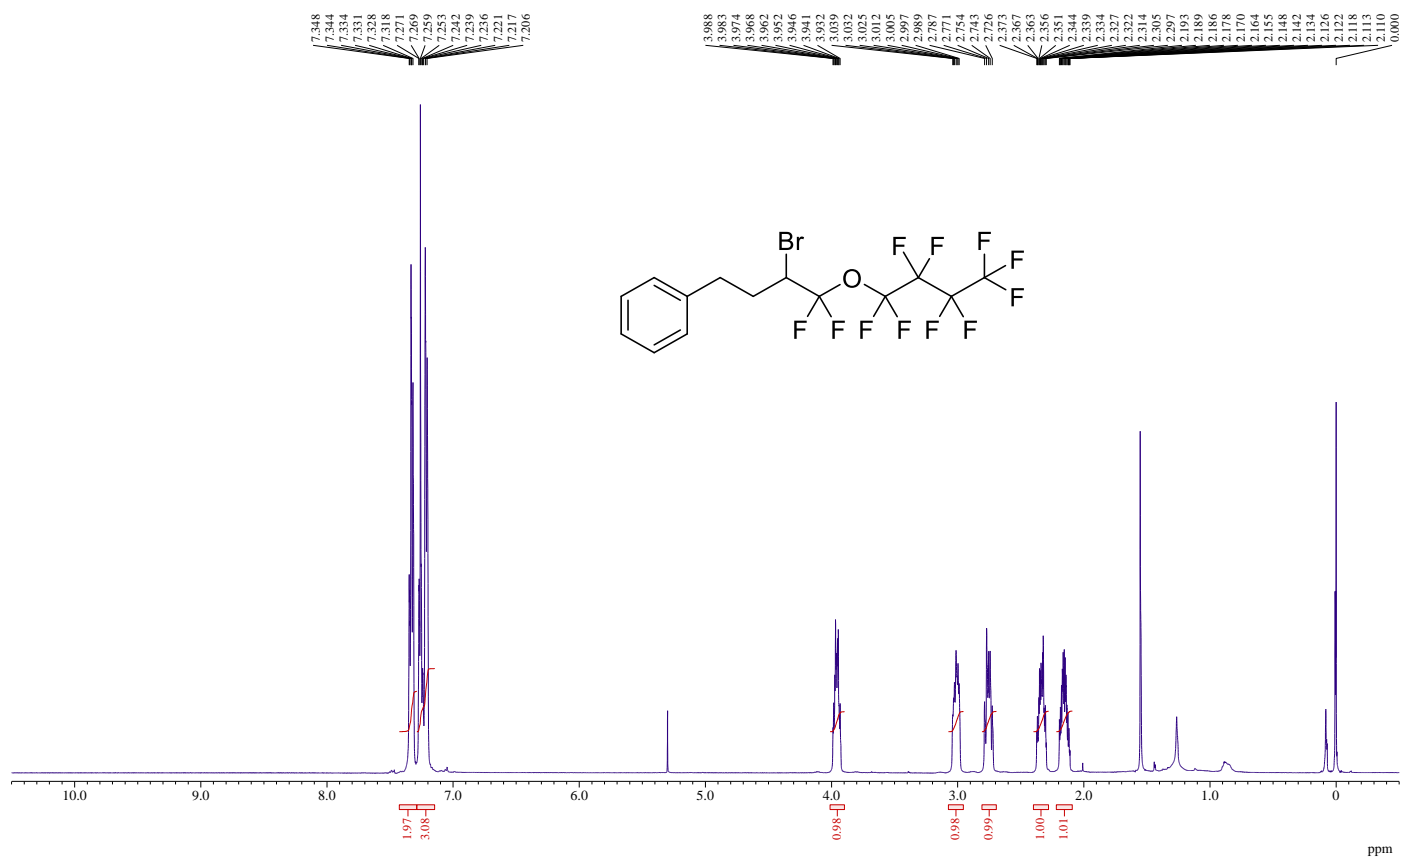

**<sup>13</sup>C NMR (126 MHz, CDCl<sub>3</sub>): 4ac**

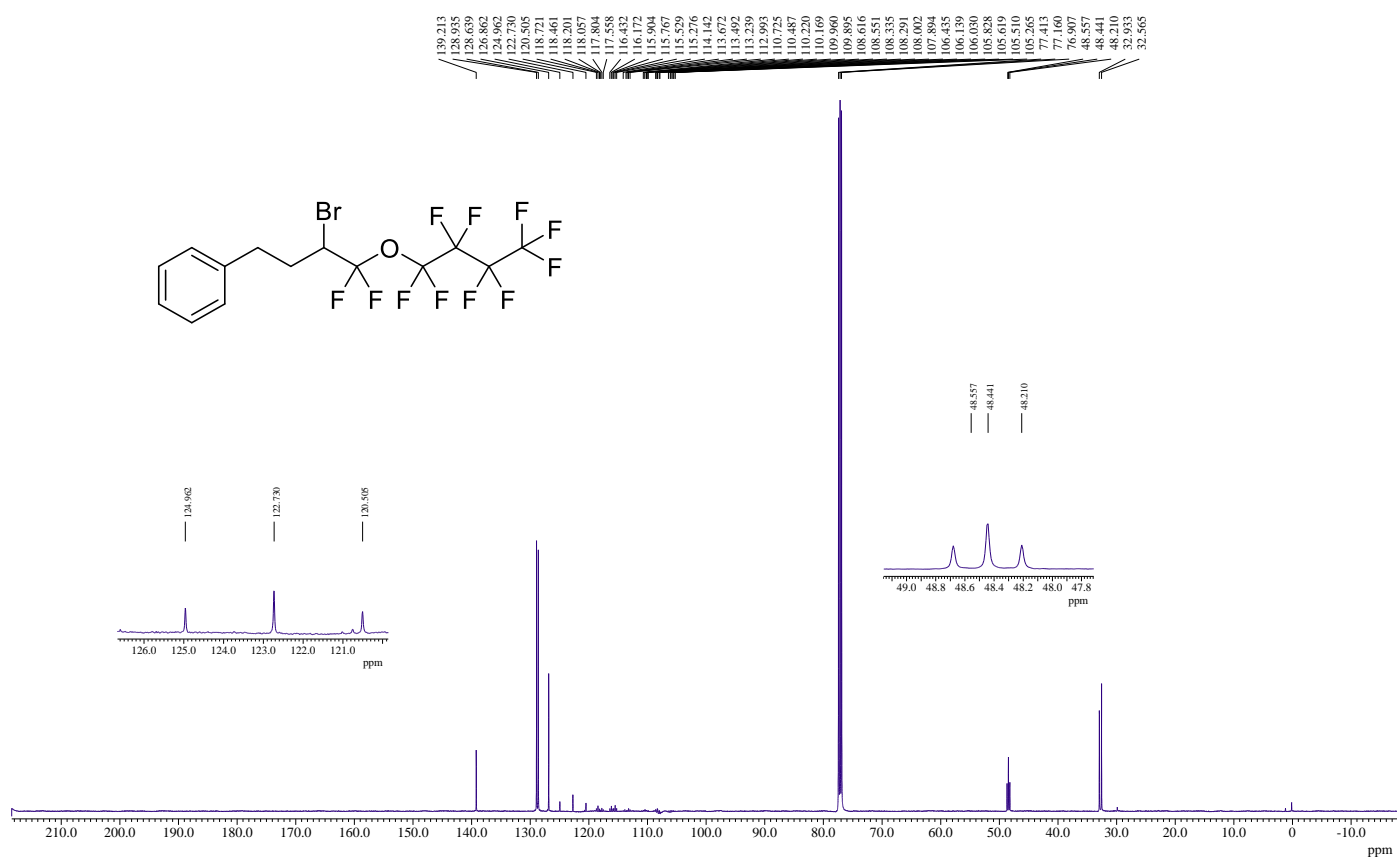

**<sup>19</sup>F NMR (282 MHz, CDCl<sub>3</sub>): 4ac**

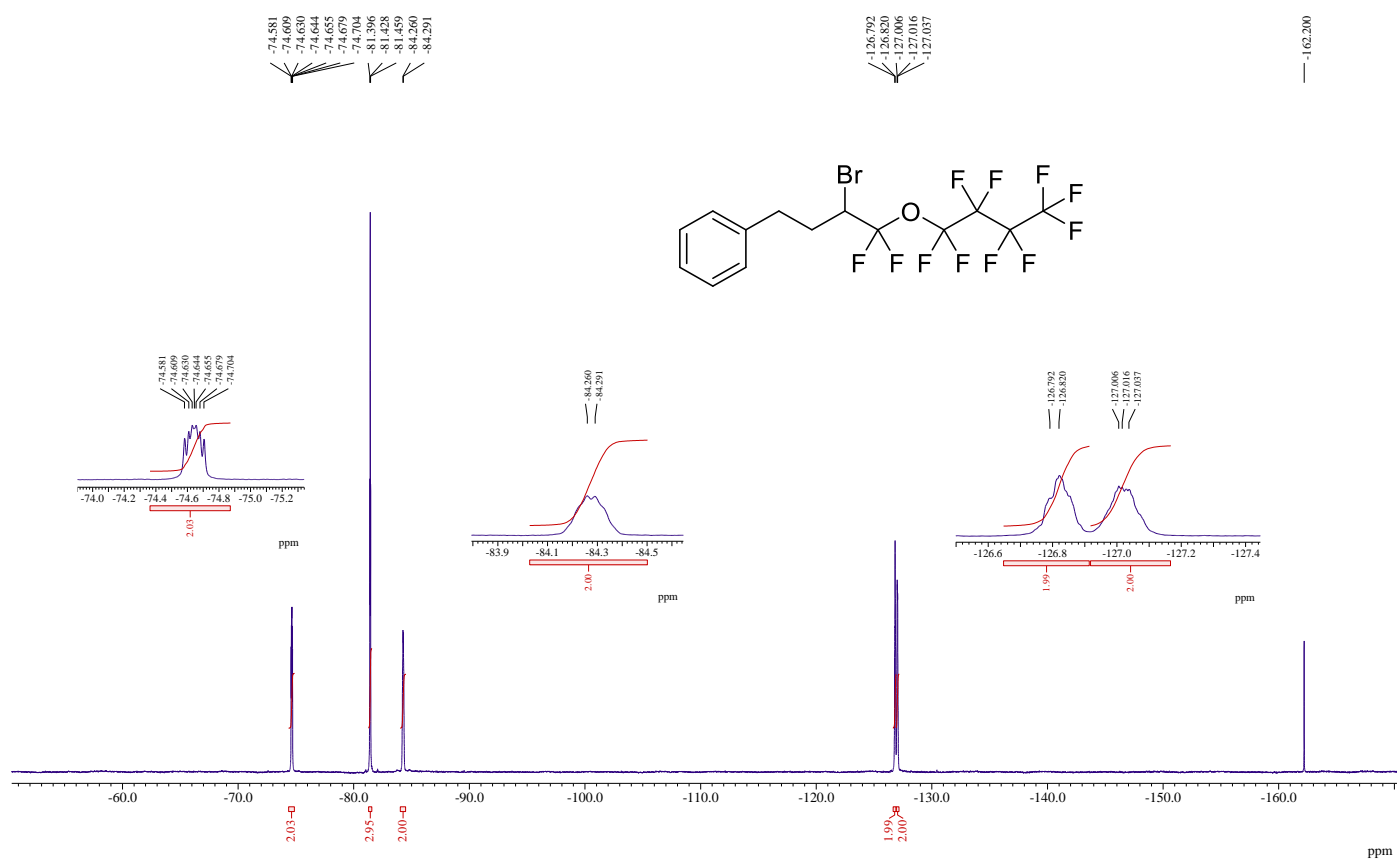

<sup>1</sup>H NMR (500 MHz, CDCl<sub>3</sub>): 4ad

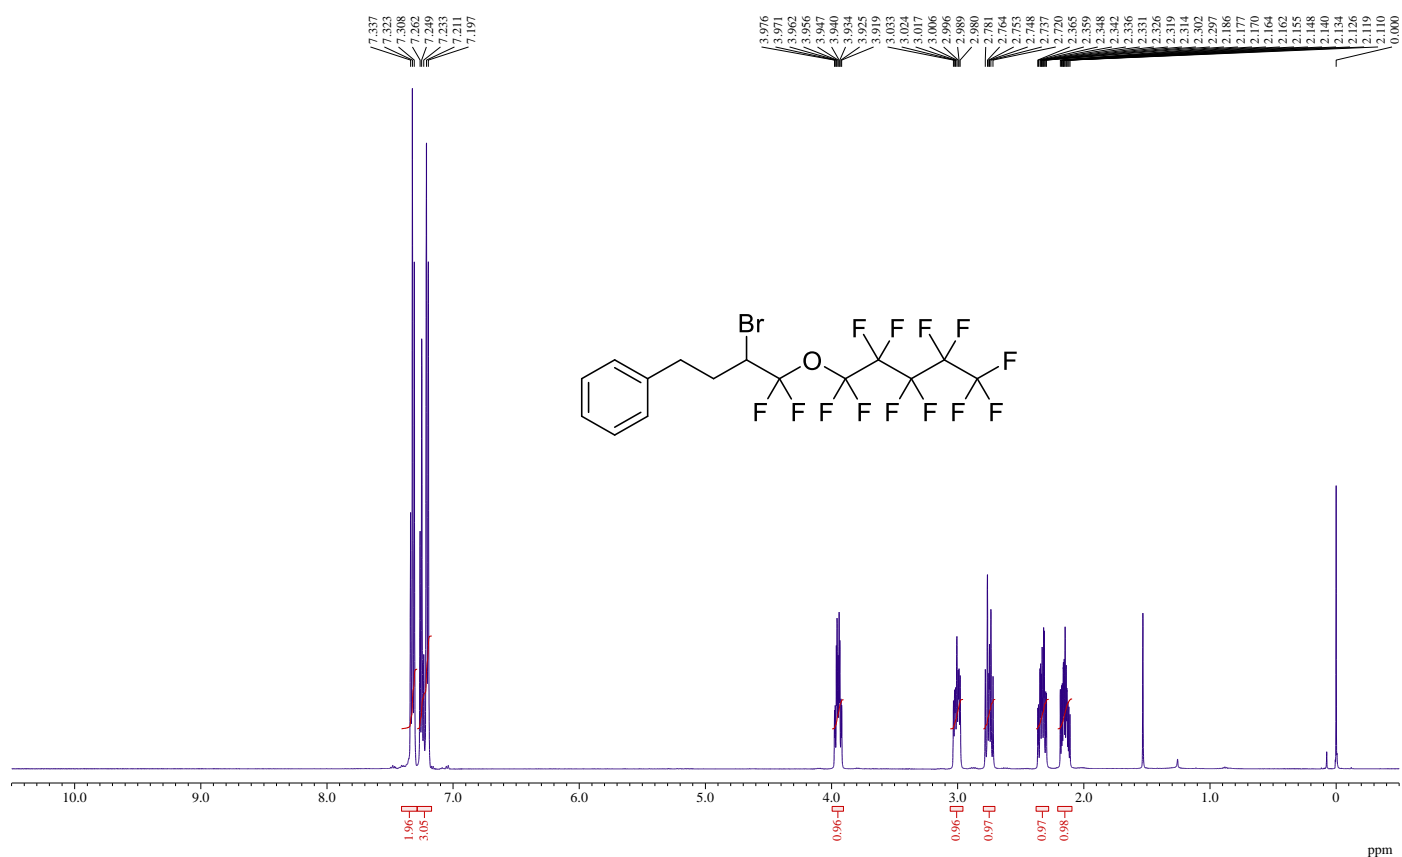

<sup>13</sup>C NMR (126 MHz, CDCl<sub>3</sub>): 4ad

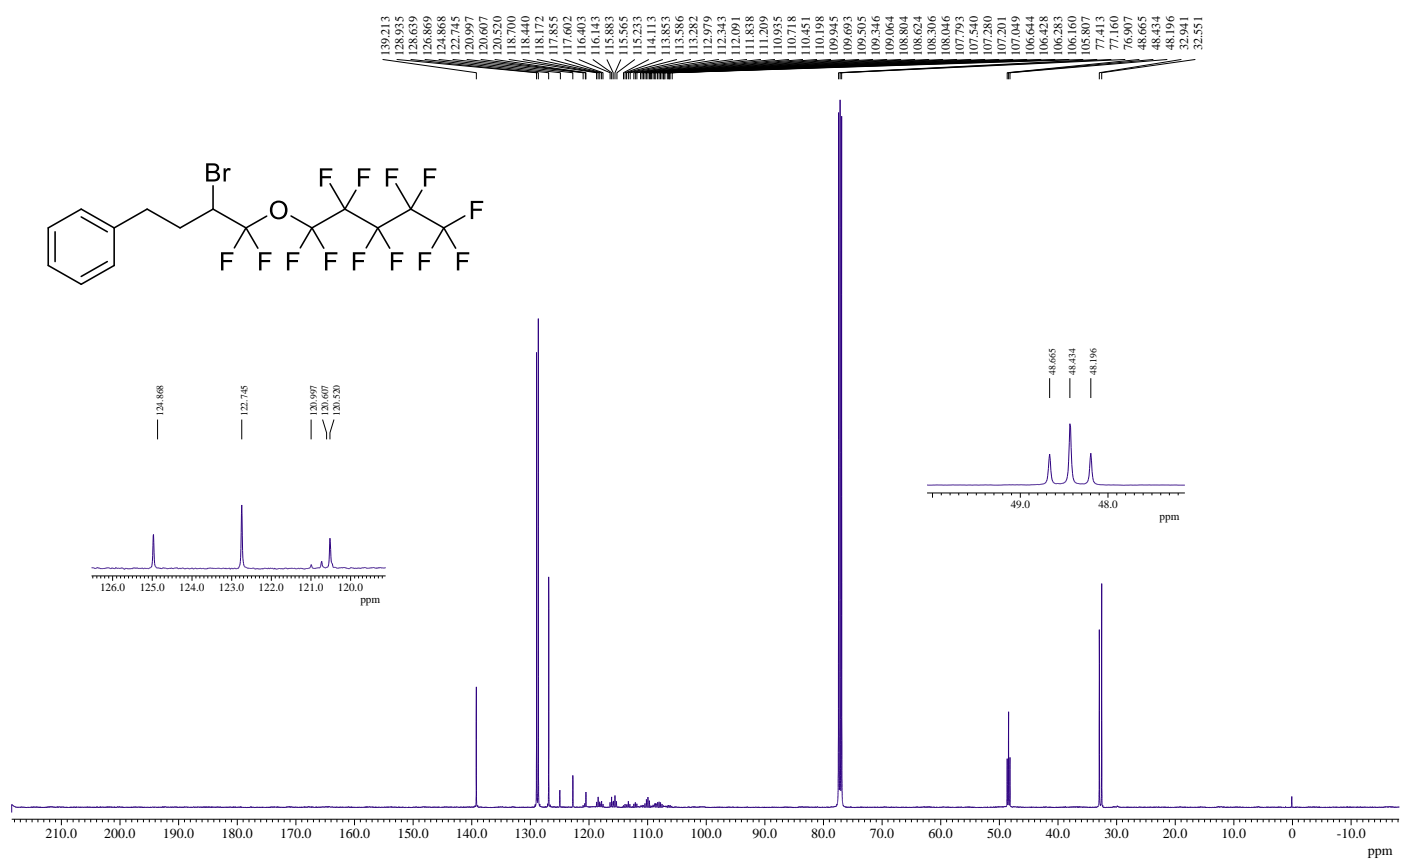

**<sup>19</sup>F NMR (282 MHz, CDCl<sub>3</sub>): 4ad**

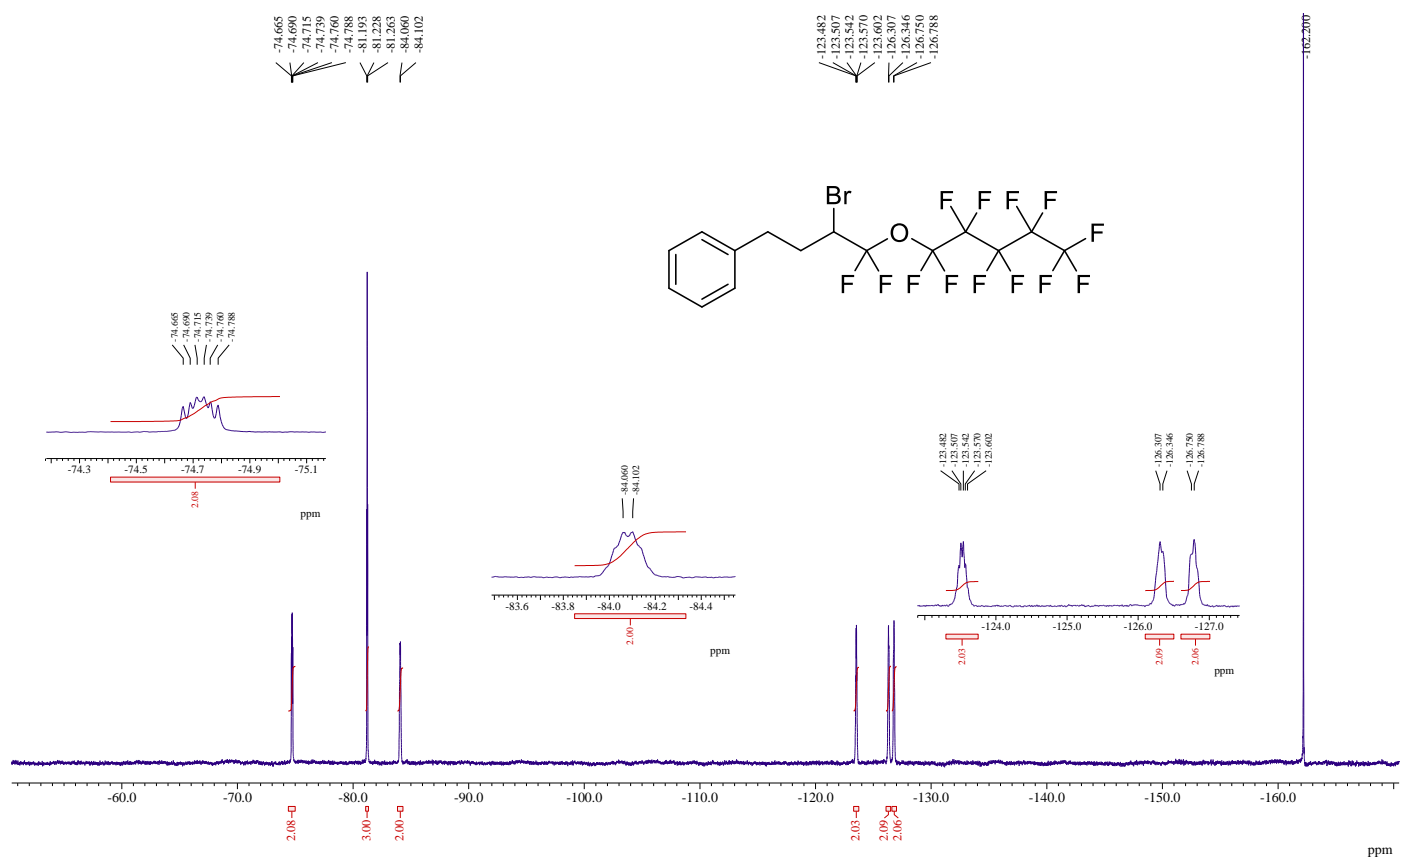

**<sup>1</sup>H NMR (500 MHz, CDCl<sub>3</sub>): 4ae**

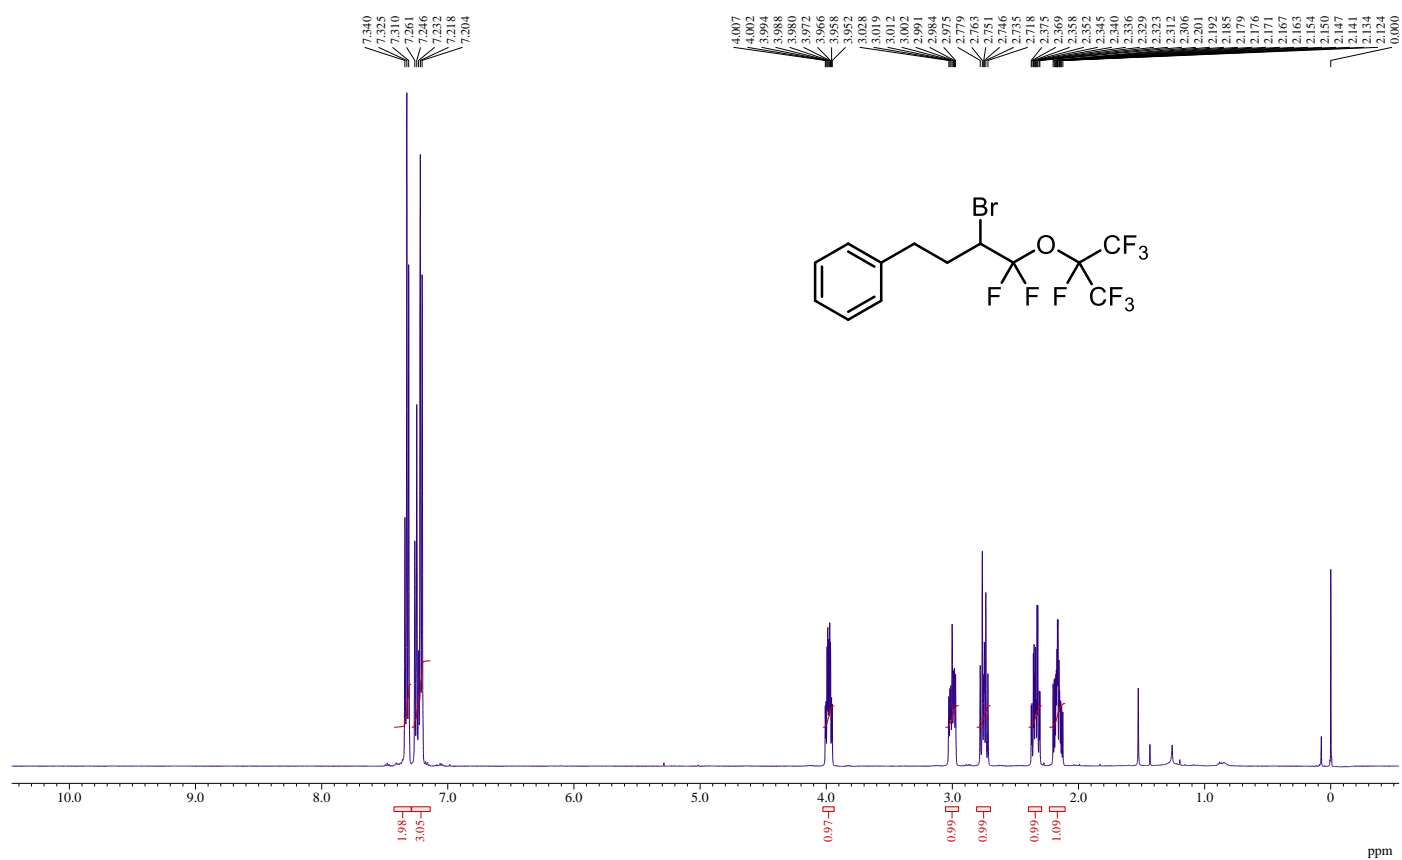

<sup>13</sup>C NMR (126 MHz, CDCl<sub>3</sub>): **4ae**

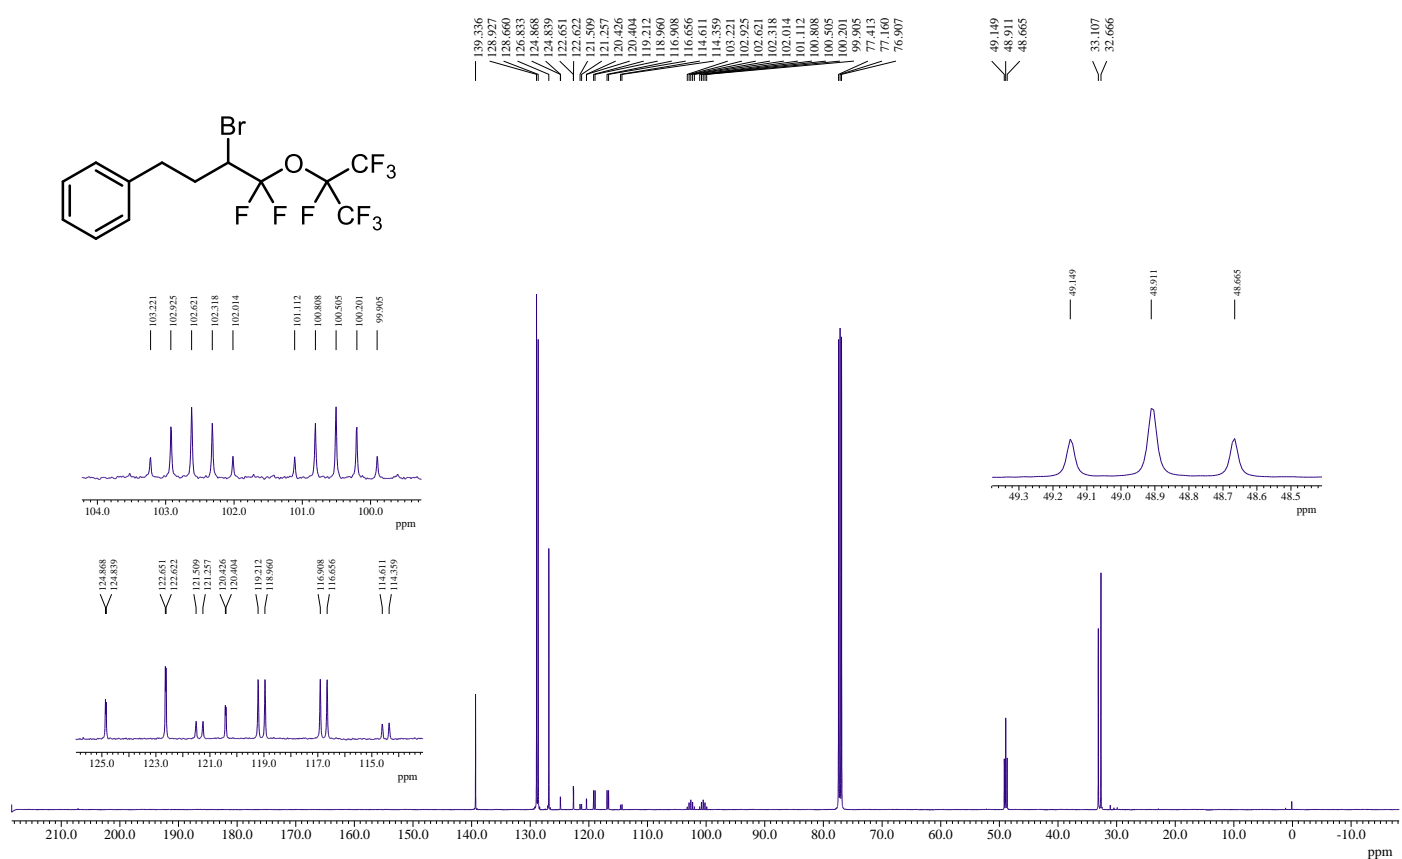

<sup>19</sup>F NMR (282 MHz, CDCl<sub>3</sub>): **4ae**

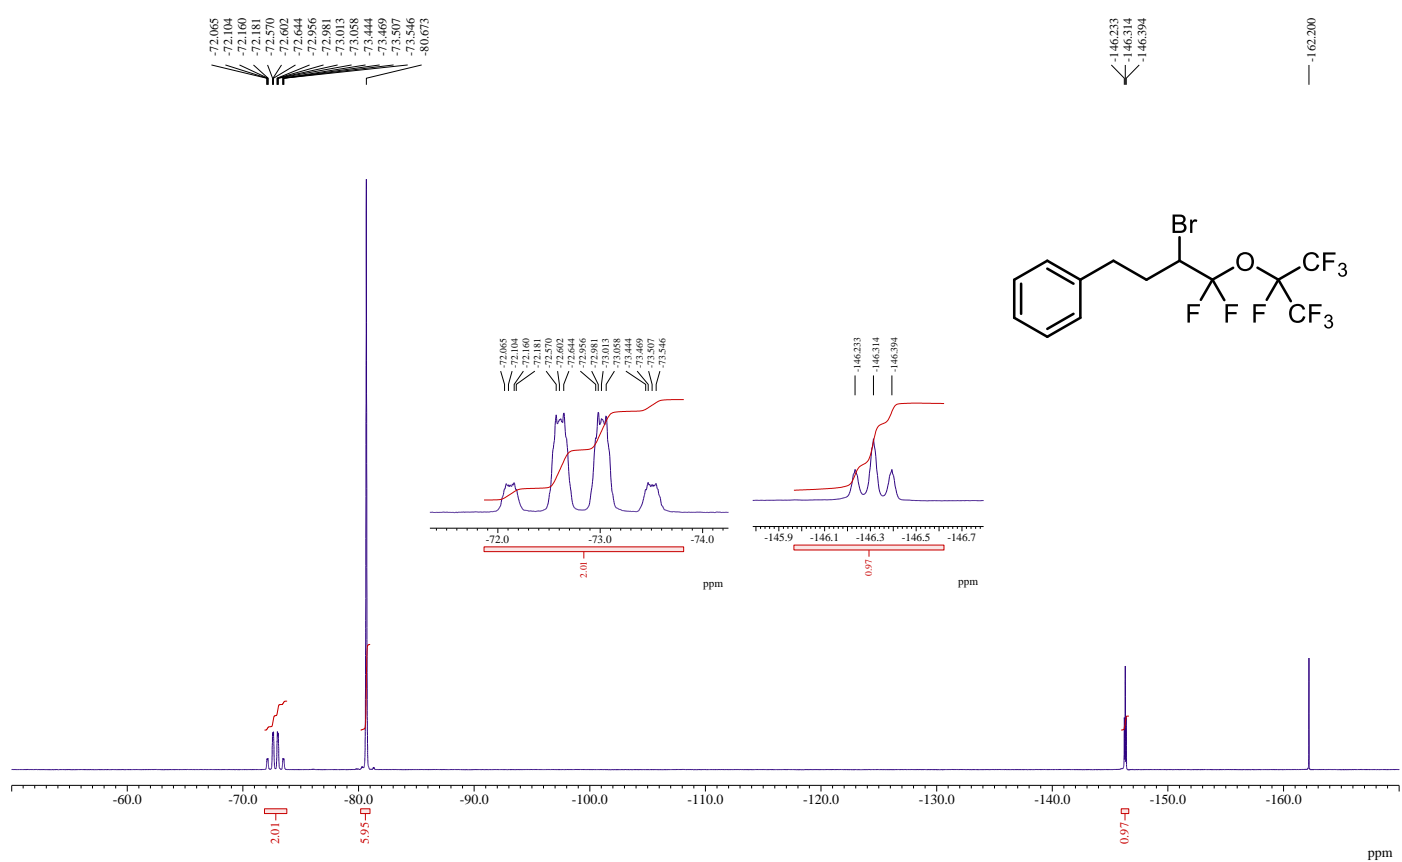

**<sup>1</sup>H NMR (500 MHz, CDCl<sub>3</sub>): 6aa**

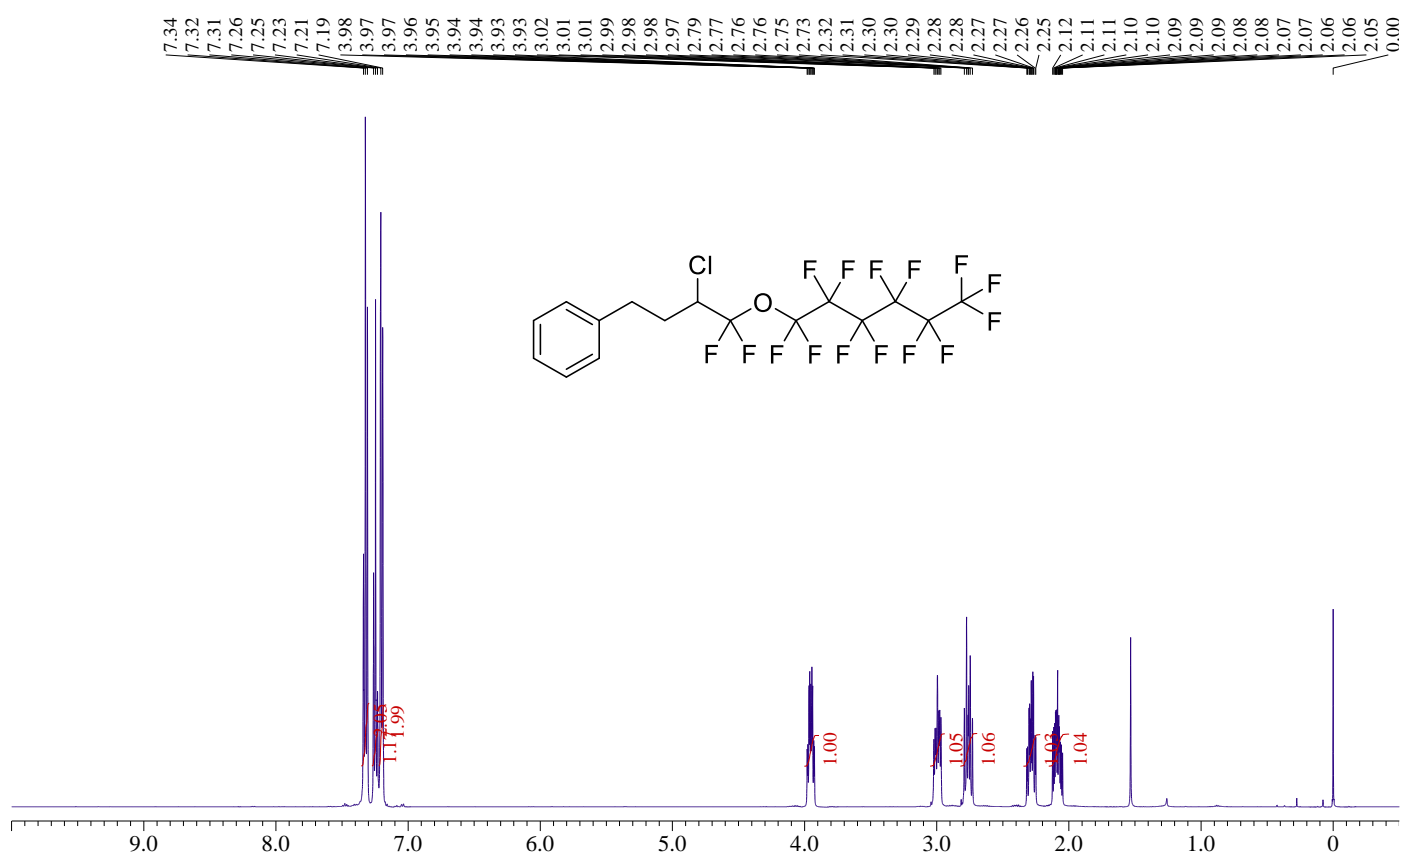

**<sup>13</sup>C NMR (126 MHz, CDCl<sub>3</sub>): 6aa**

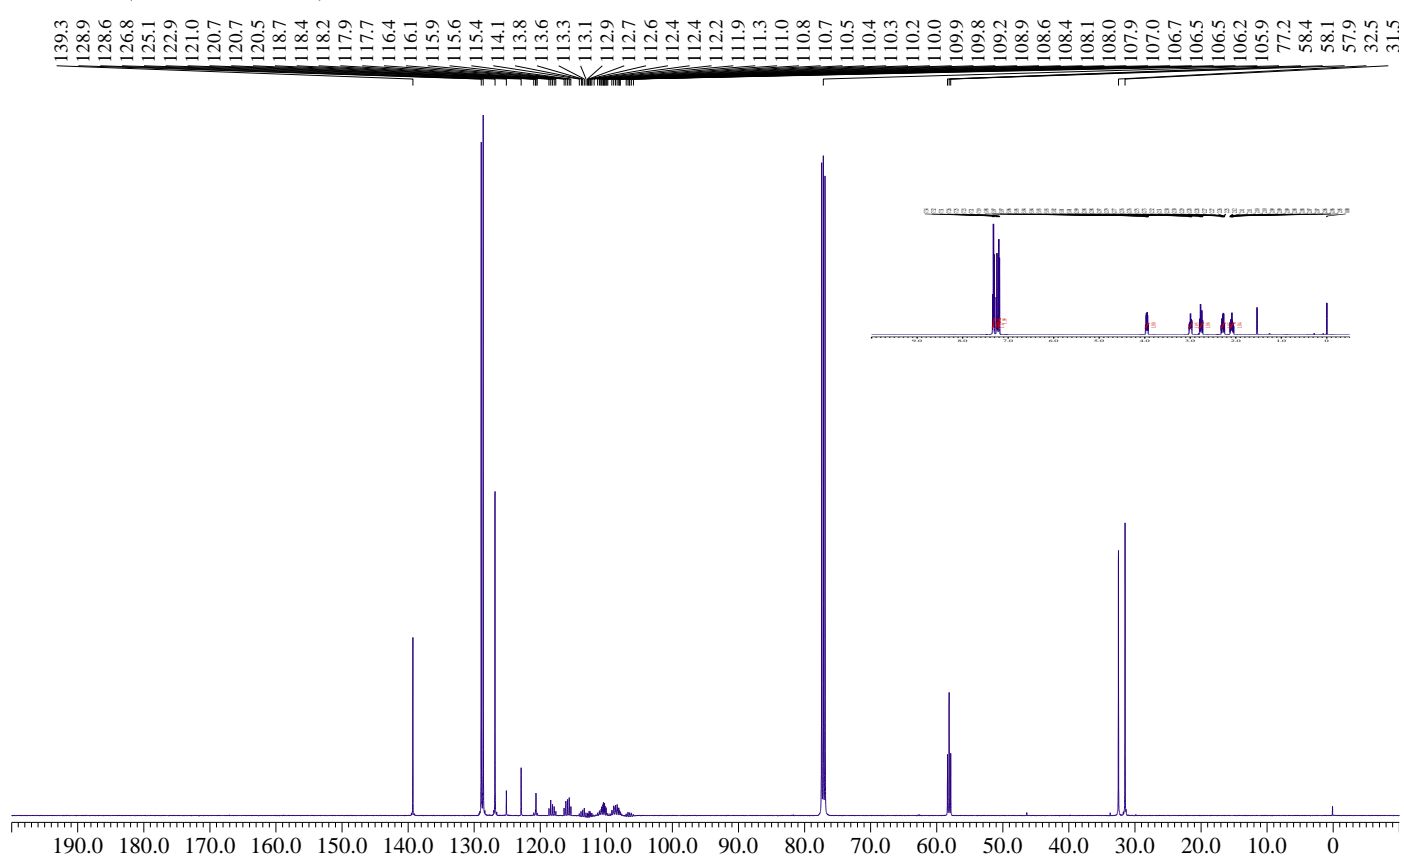



<sup>19</sup>F NMR (282 MHz, CDCl<sub>3</sub>): **6aa**

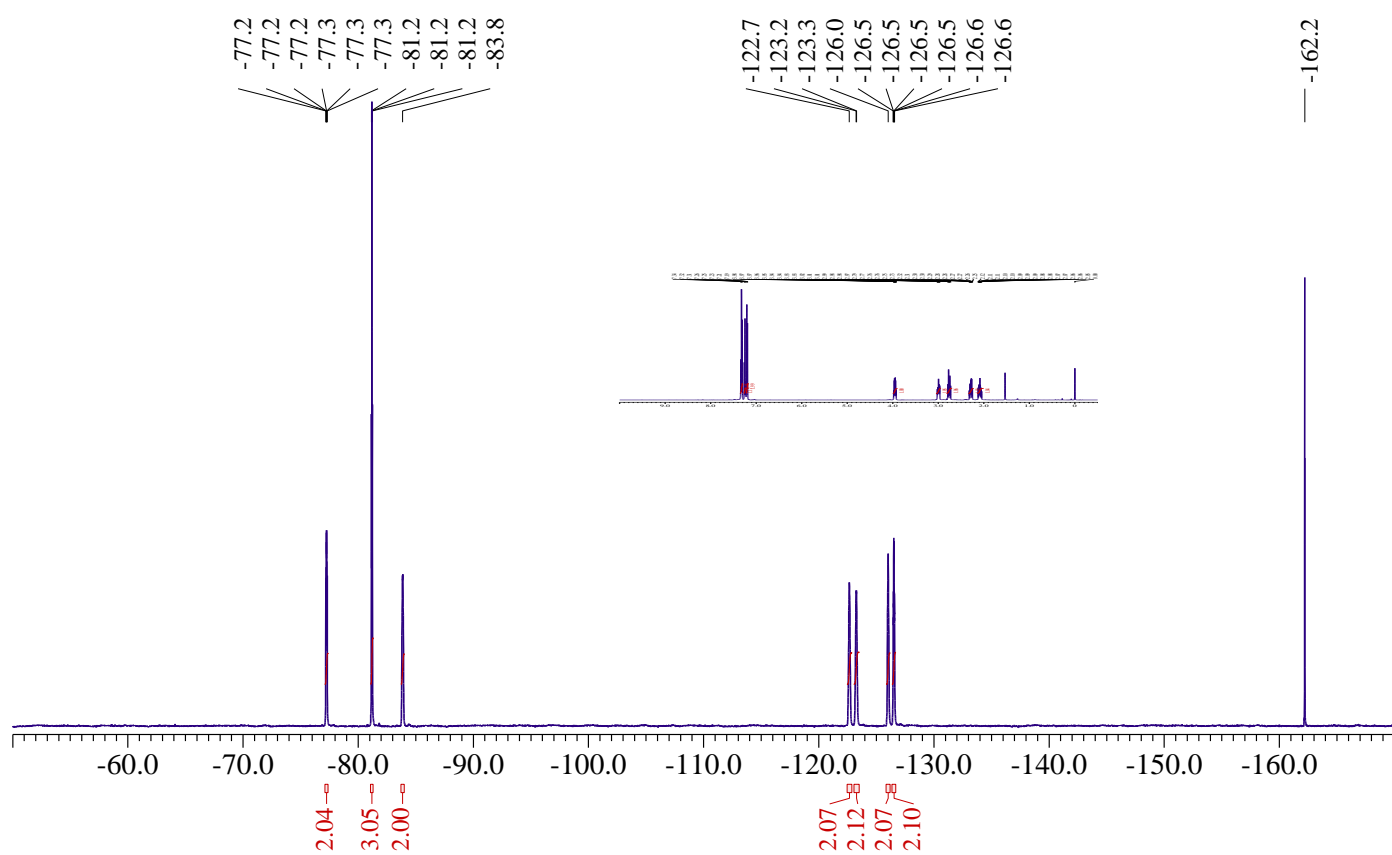

<sup>1</sup>H NMR (500 MHz, CDCl<sub>3</sub>): **6ba**

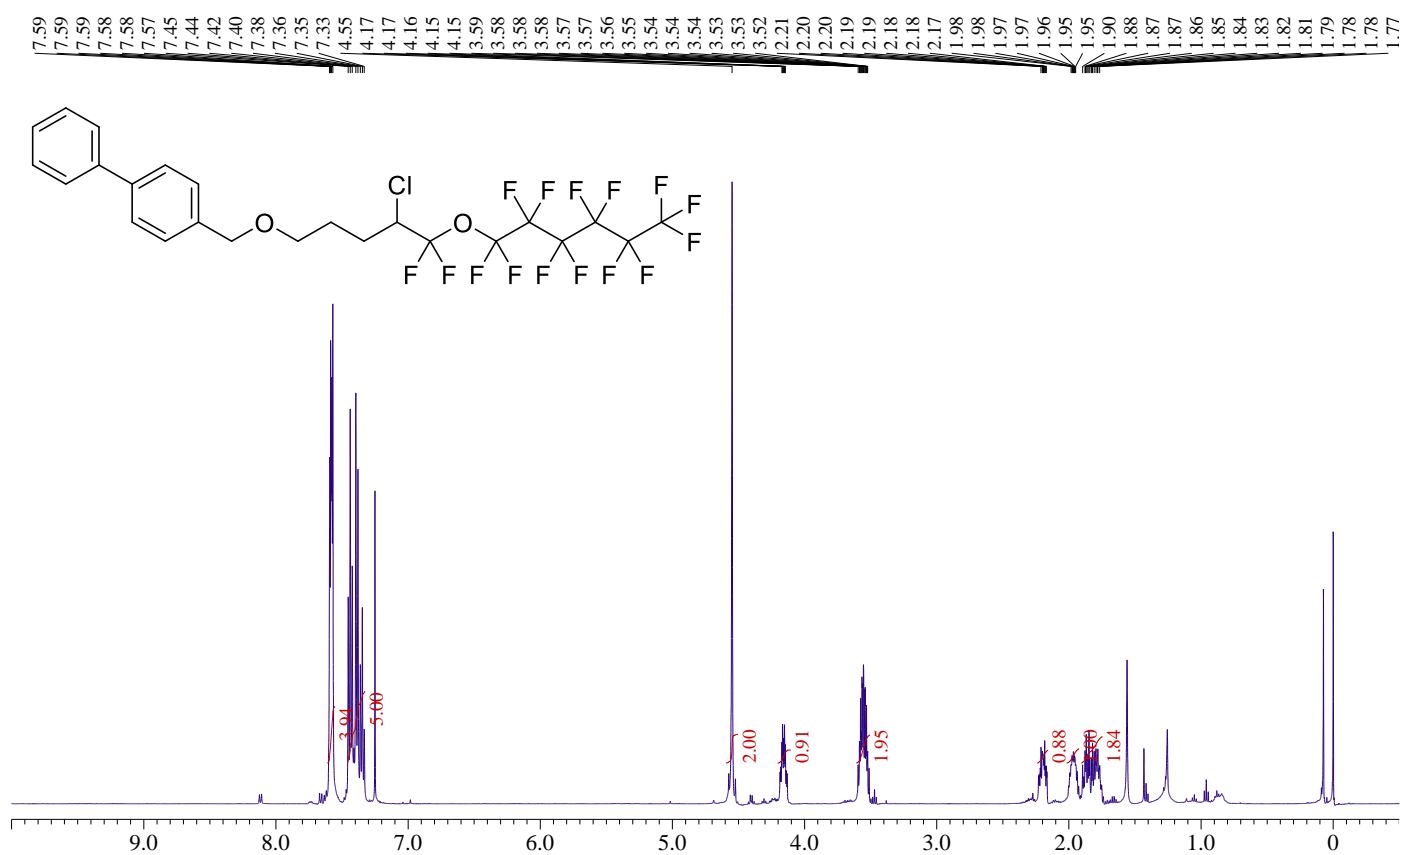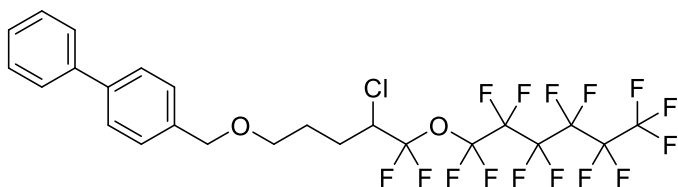

<sup>13</sup>C NMR (126 MHz, CDCl<sub>3</sub>): 6ba

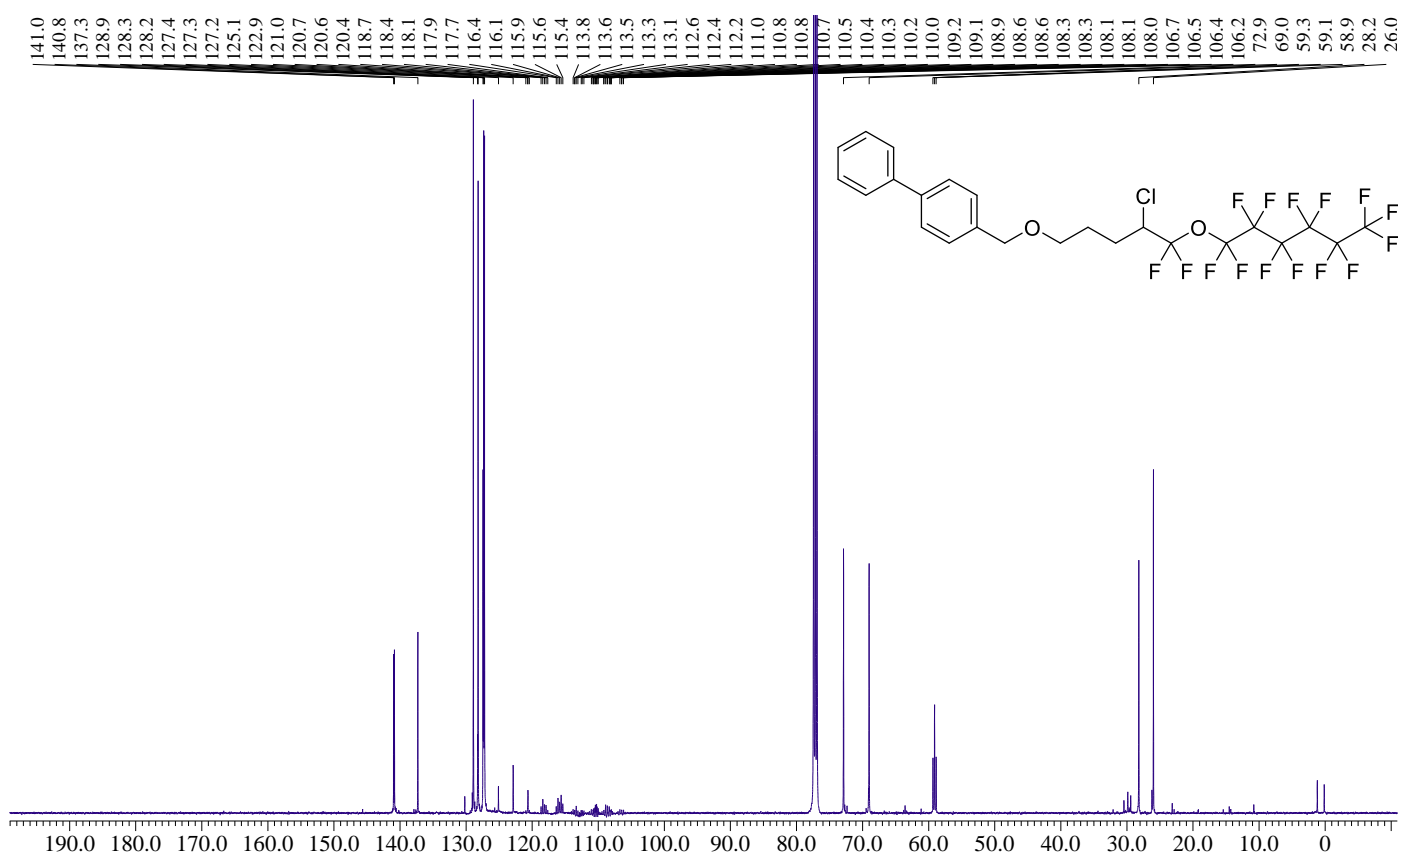

<sup>19</sup>F NMR (282 MHz, CDCl<sub>3</sub>): 6ba

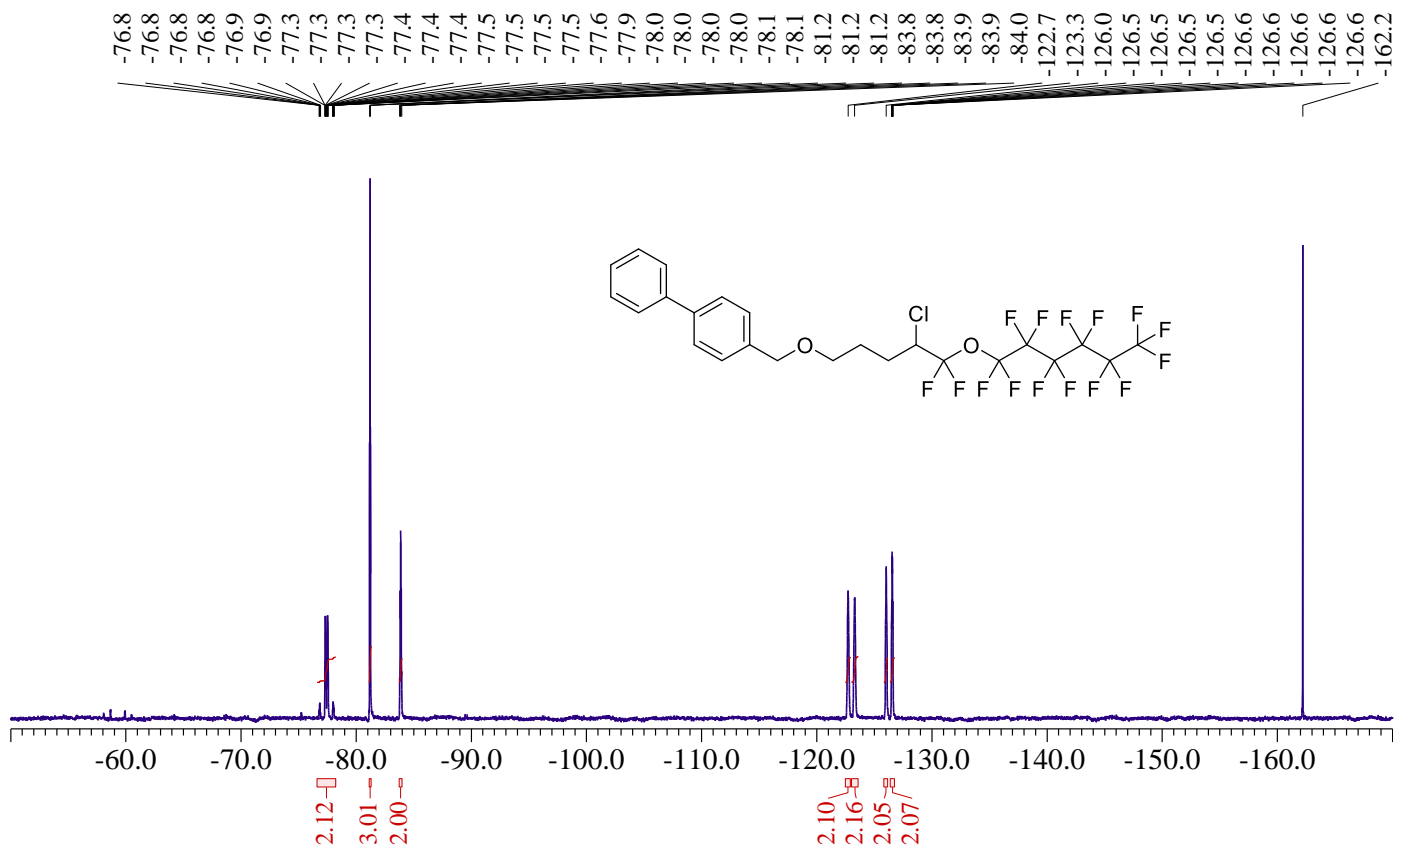

**<sup>1</sup>H NMR (500 MHz, CDCl<sub>3</sub>): 6da**

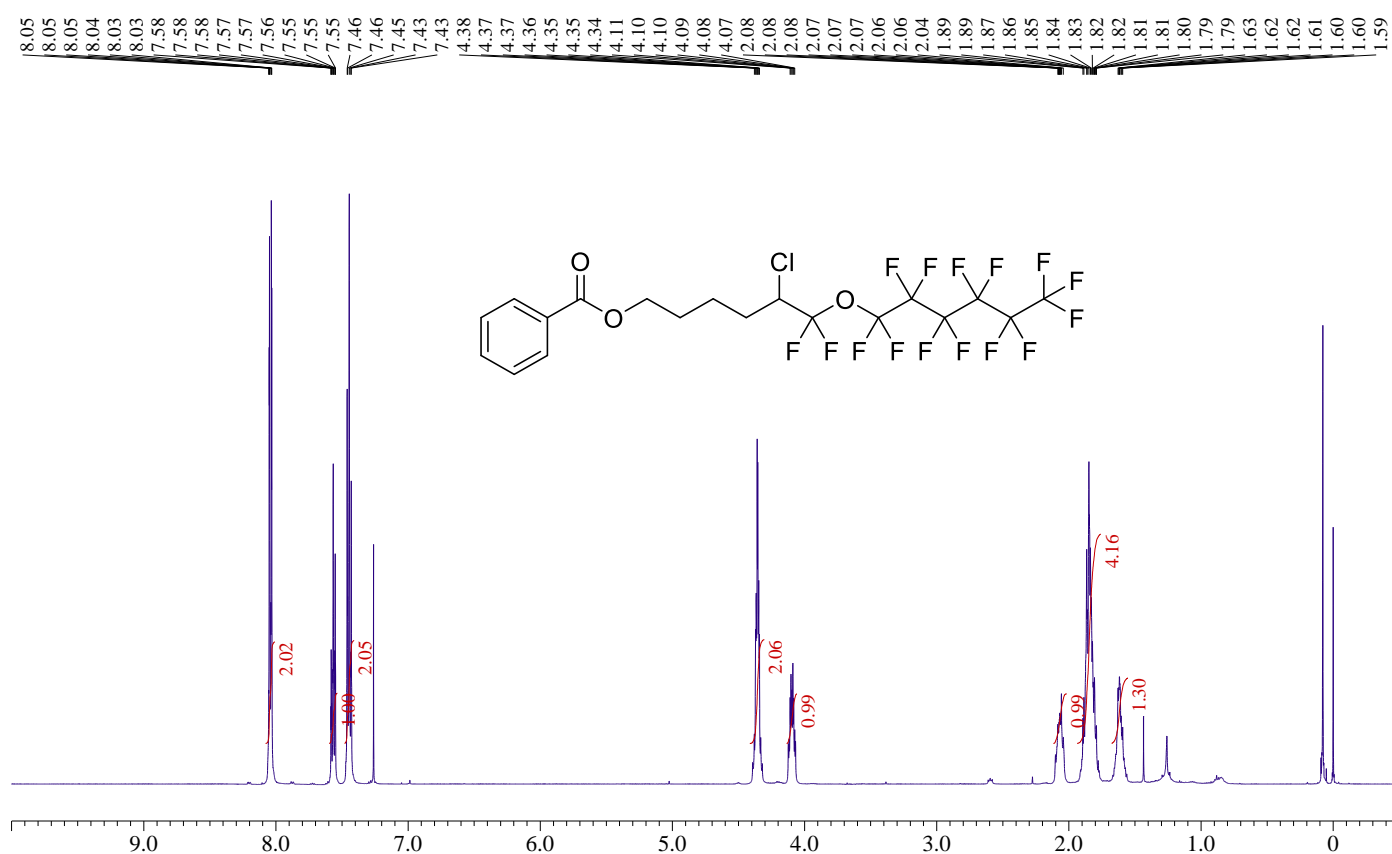

**<sup>13</sup>C NMR (126 MHz, CDCl<sub>3</sub>): 6da**

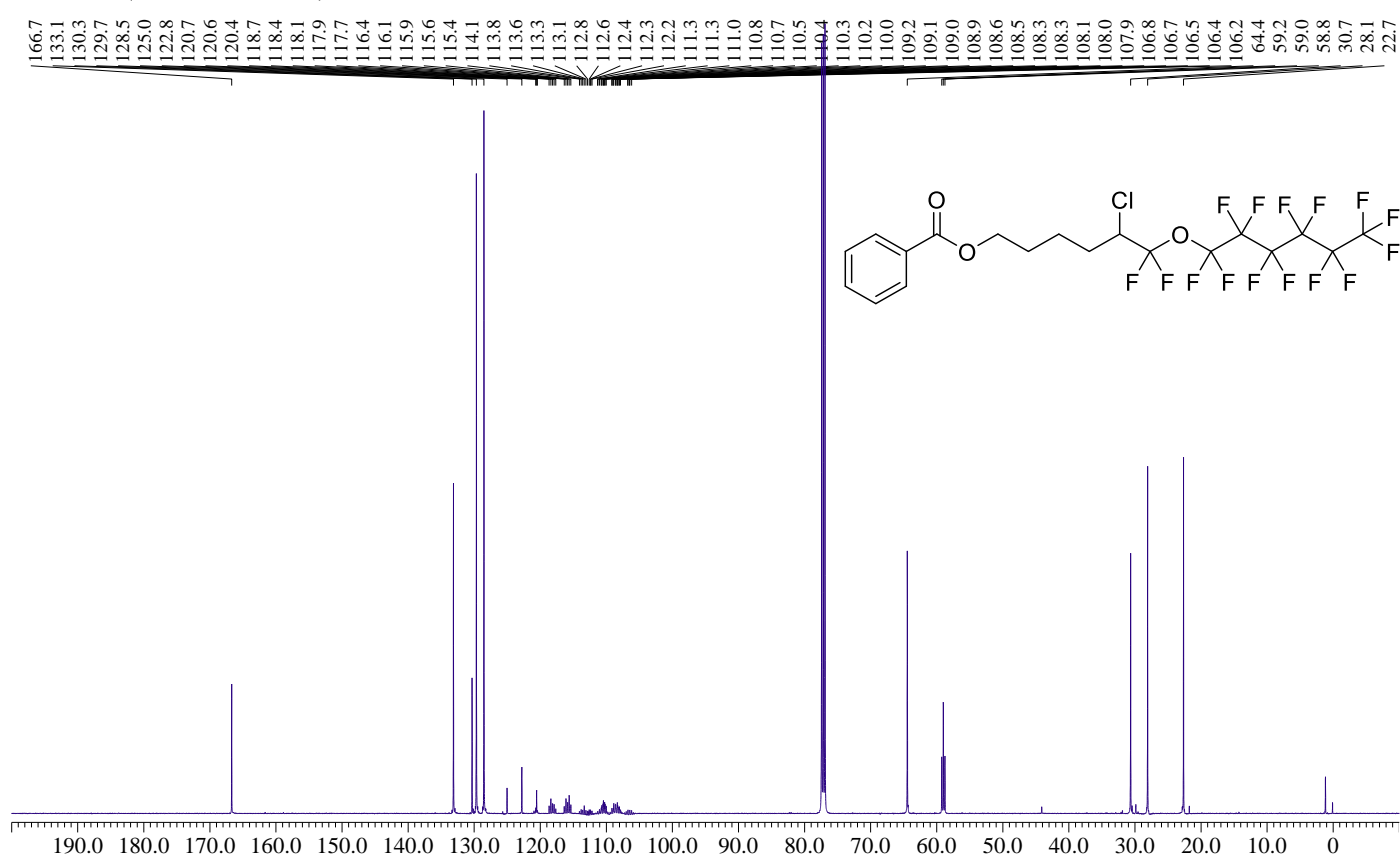

<sup>19</sup>F NMR (282 MHz, CDCl<sub>3</sub>): **6da**

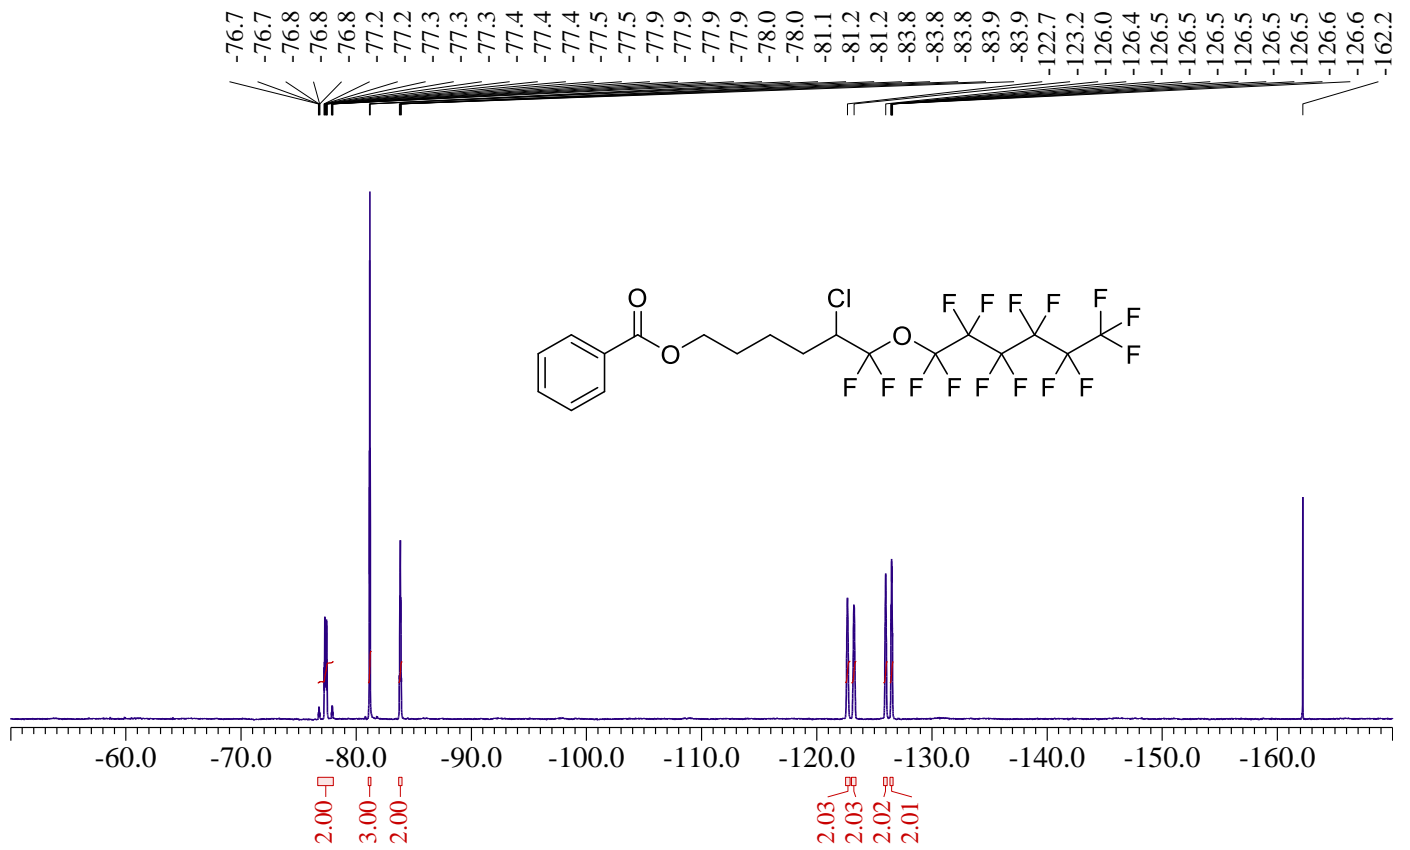

<sup>1</sup>H NMR (500 MHz, CDCl<sub>3</sub>): **6ea**

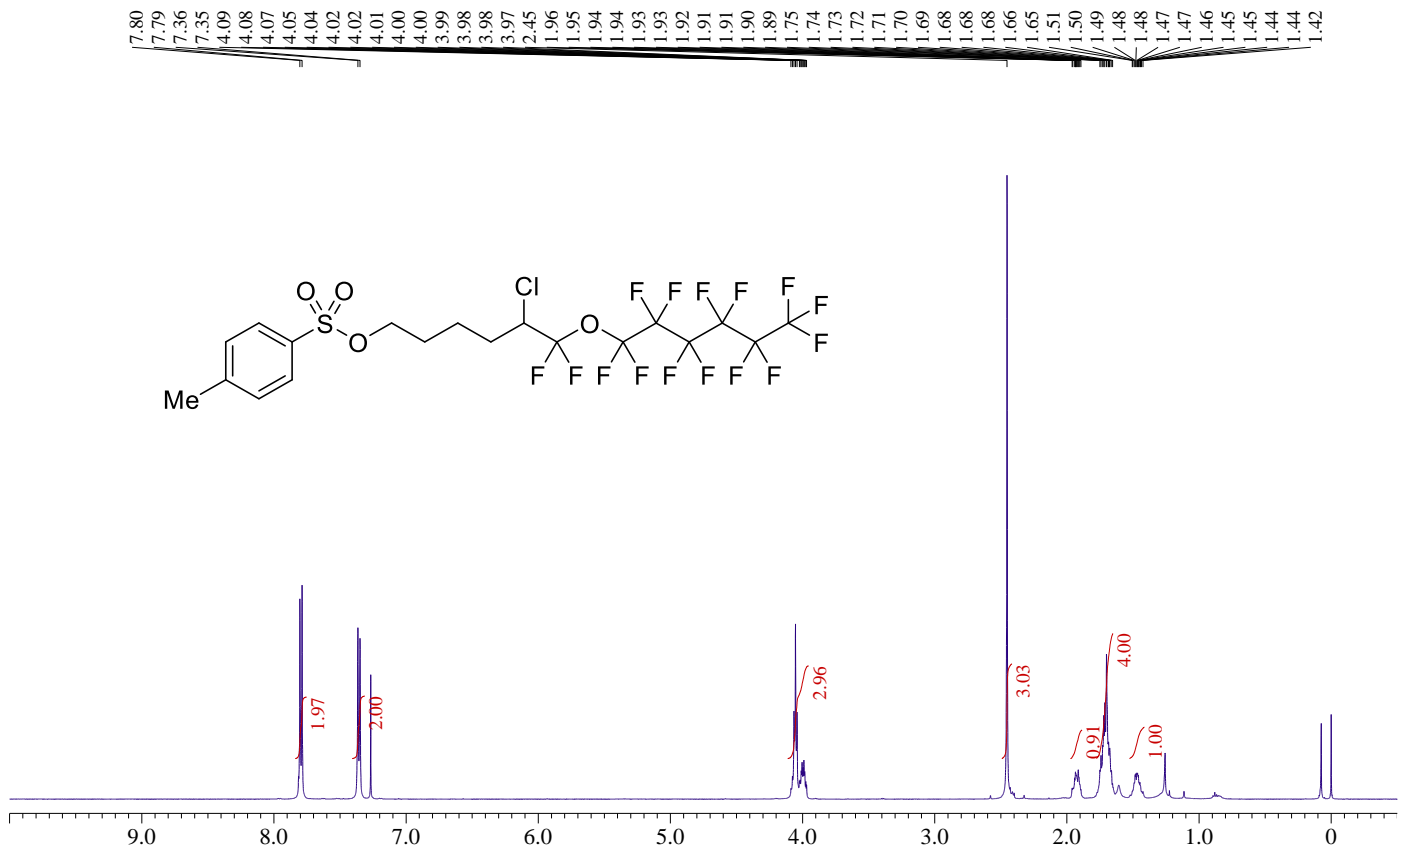

**<sup>13</sup>C NMR (126 MHz, CDCl<sub>3</sub>): 6a**

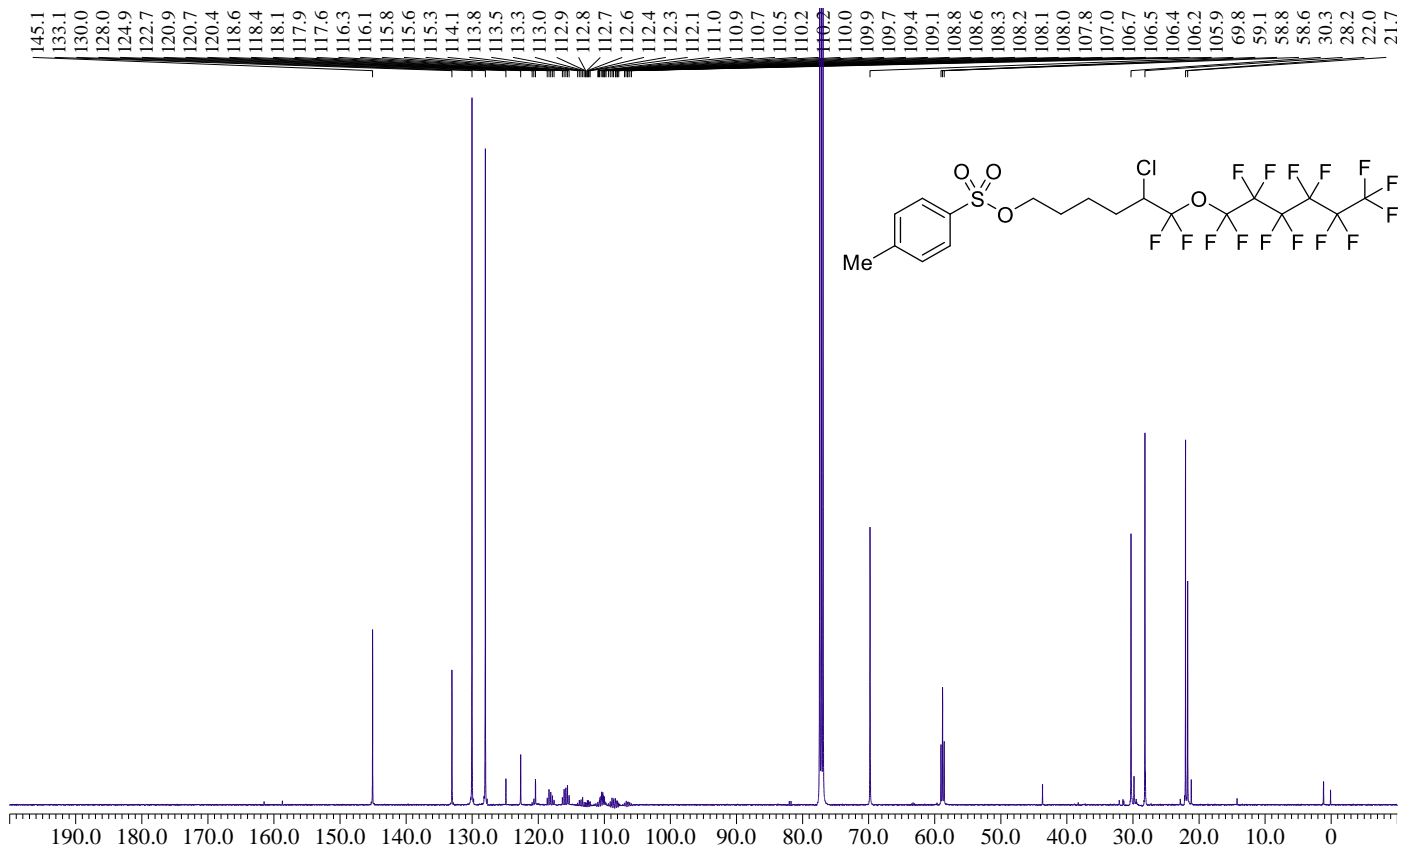

**<sup>19</sup>F NMR (282 MHz, CDCl<sub>3</sub>): 6a**

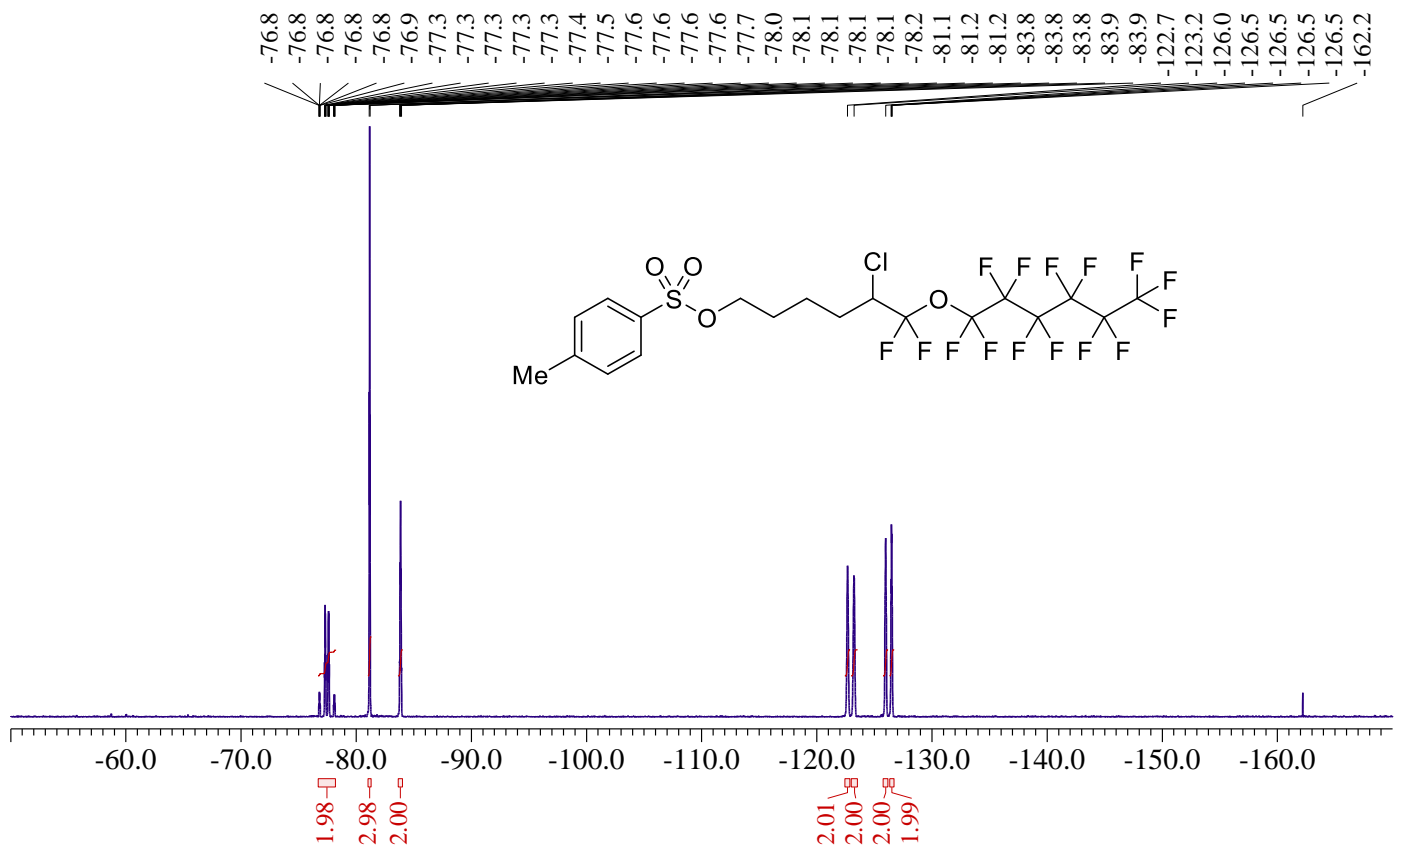

**<sup>1</sup>H NMR (500 MHz, CDCl<sub>3</sub>): 6ta**

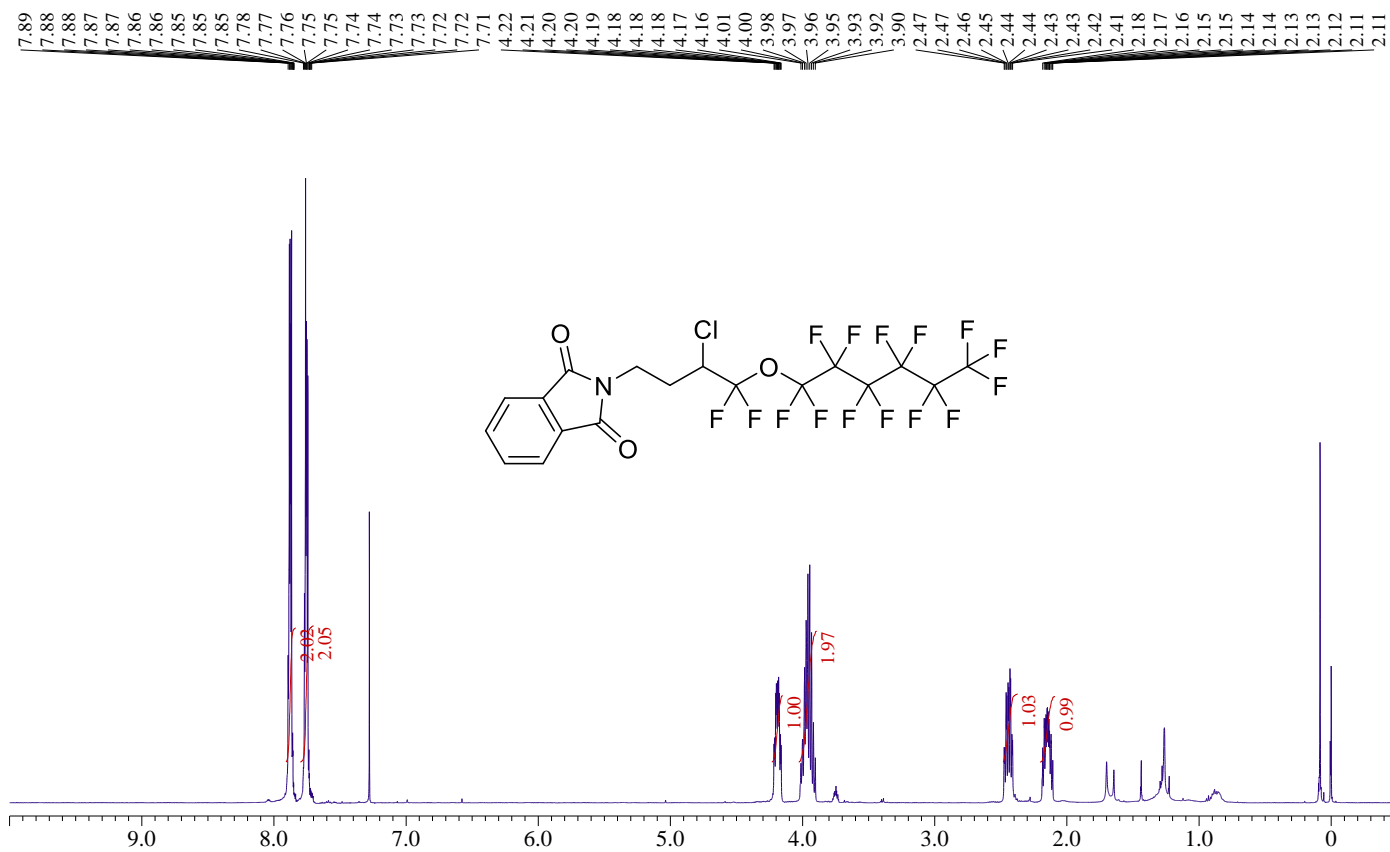

**<sup>13</sup>C NMR (126 MHz, CDCl<sub>3</sub>): 6ta**

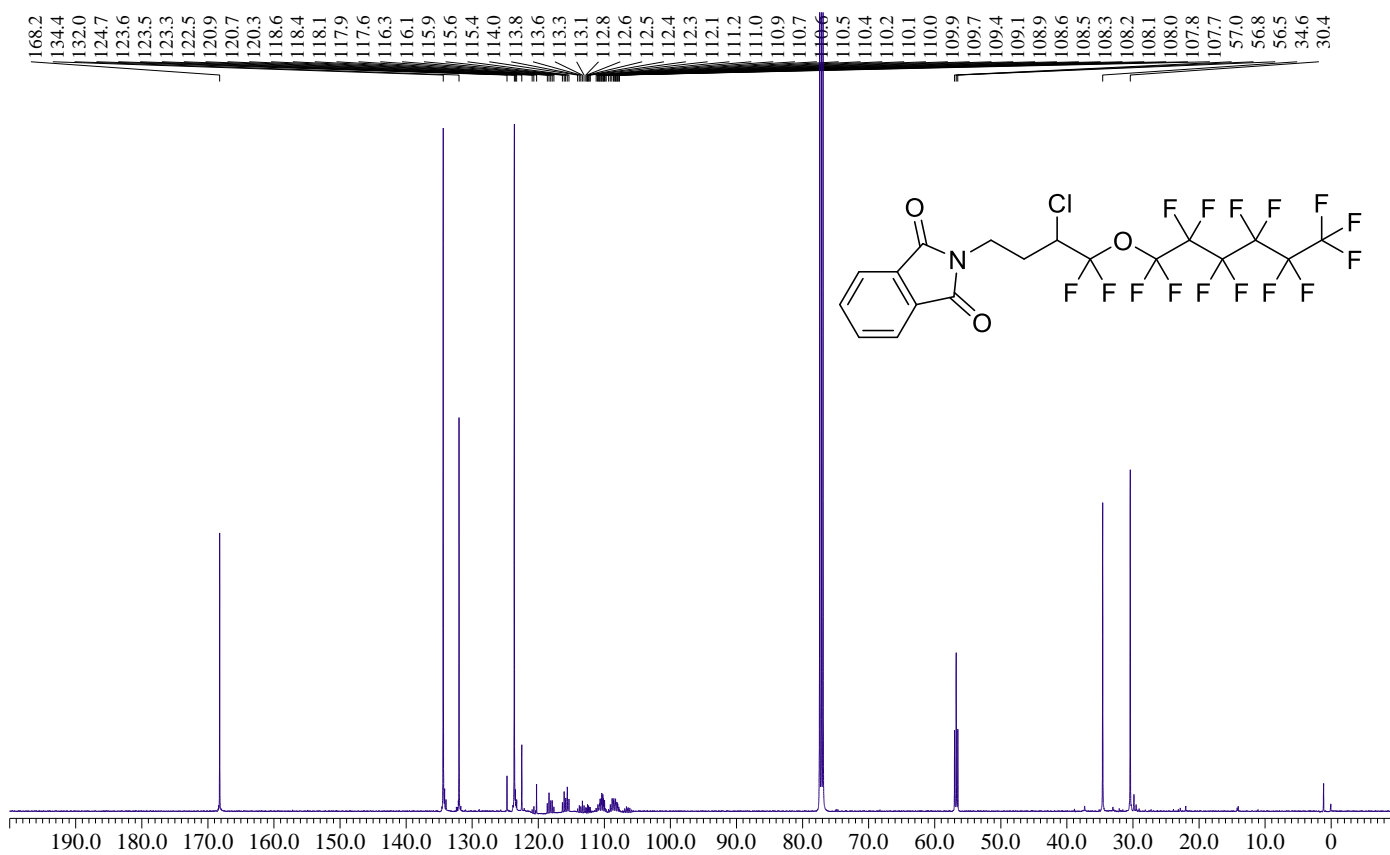

<sup>19</sup>F NMR (282 MHz, CDCl<sub>3</sub>): **6ta**

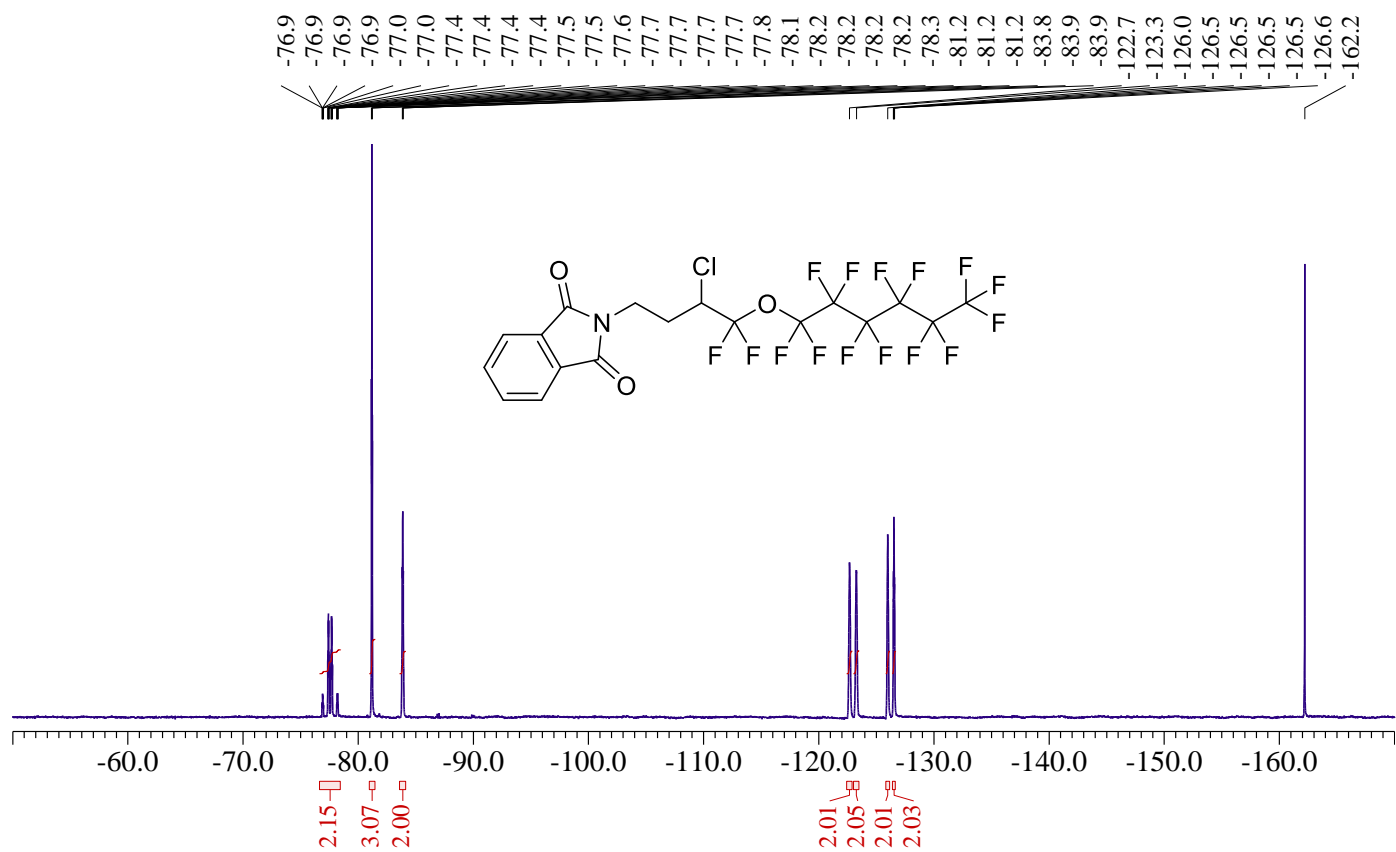

<sup>1</sup>H NMR (500 MHz, CDCl<sub>3</sub>): **7**

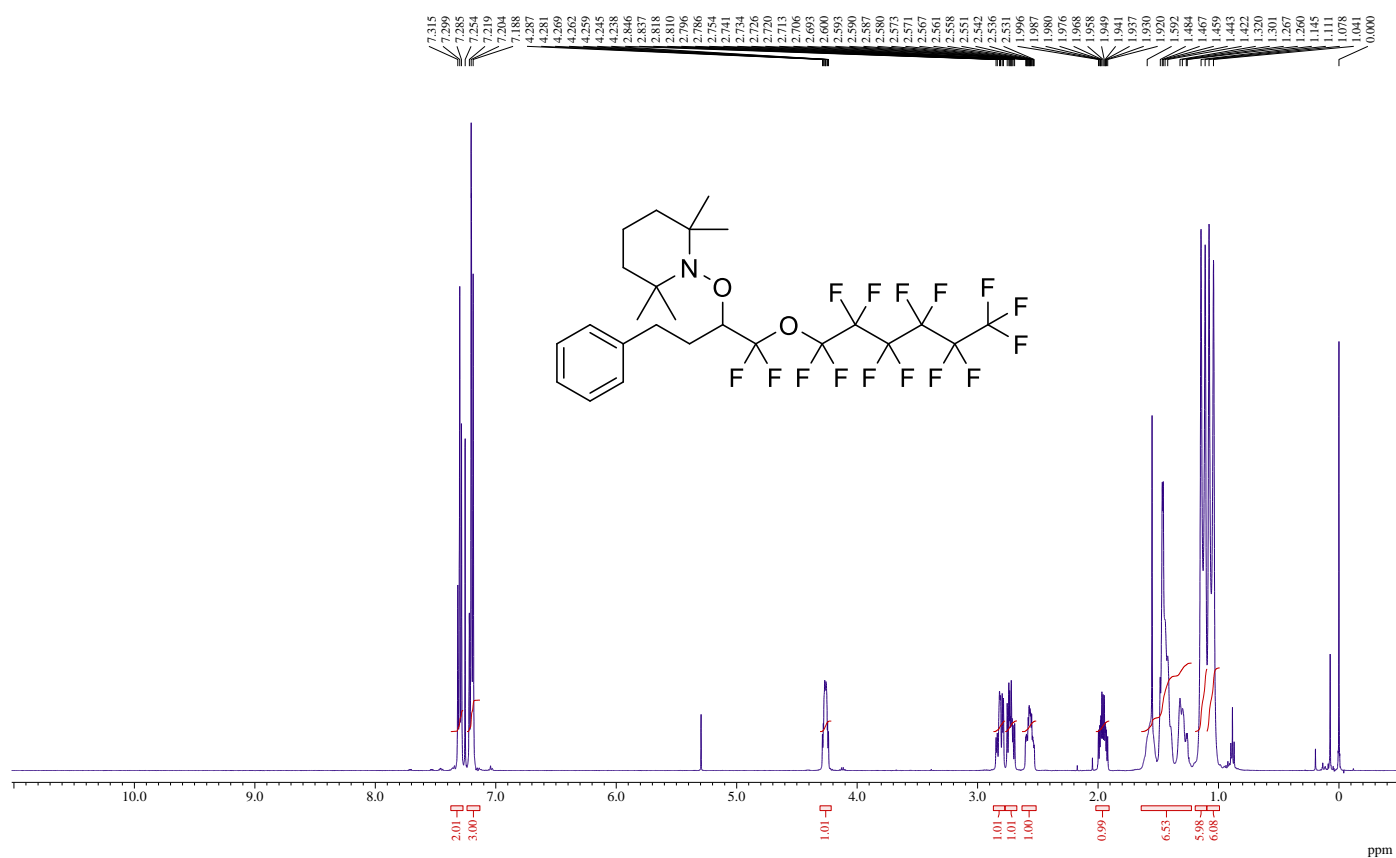

<sup>13</sup>C NMR (126 MHz, CDCl<sub>3</sub>): 7

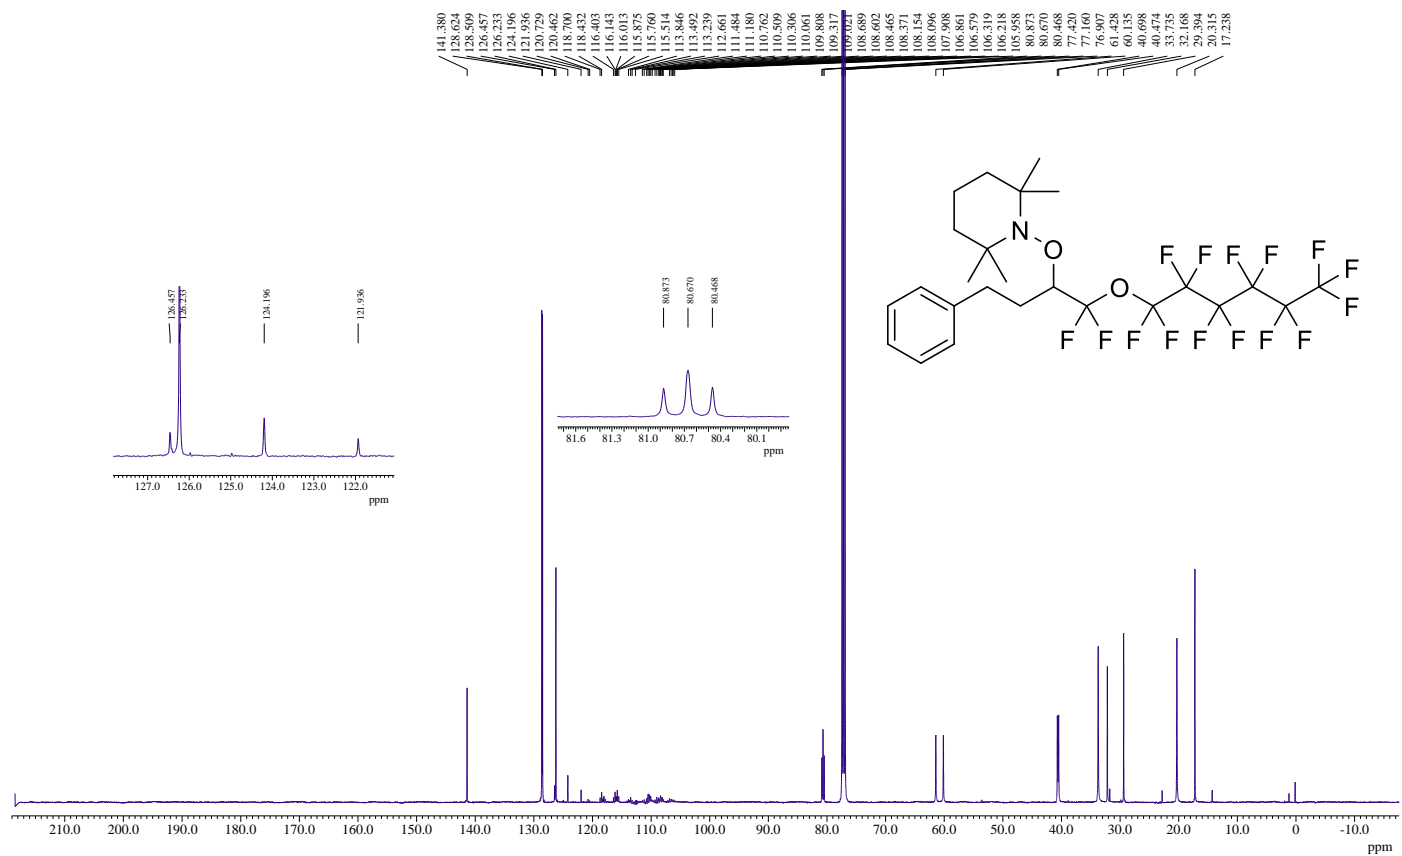

<sup>19</sup>F NMR (282 MHz, CDCl<sub>3</sub>): 7

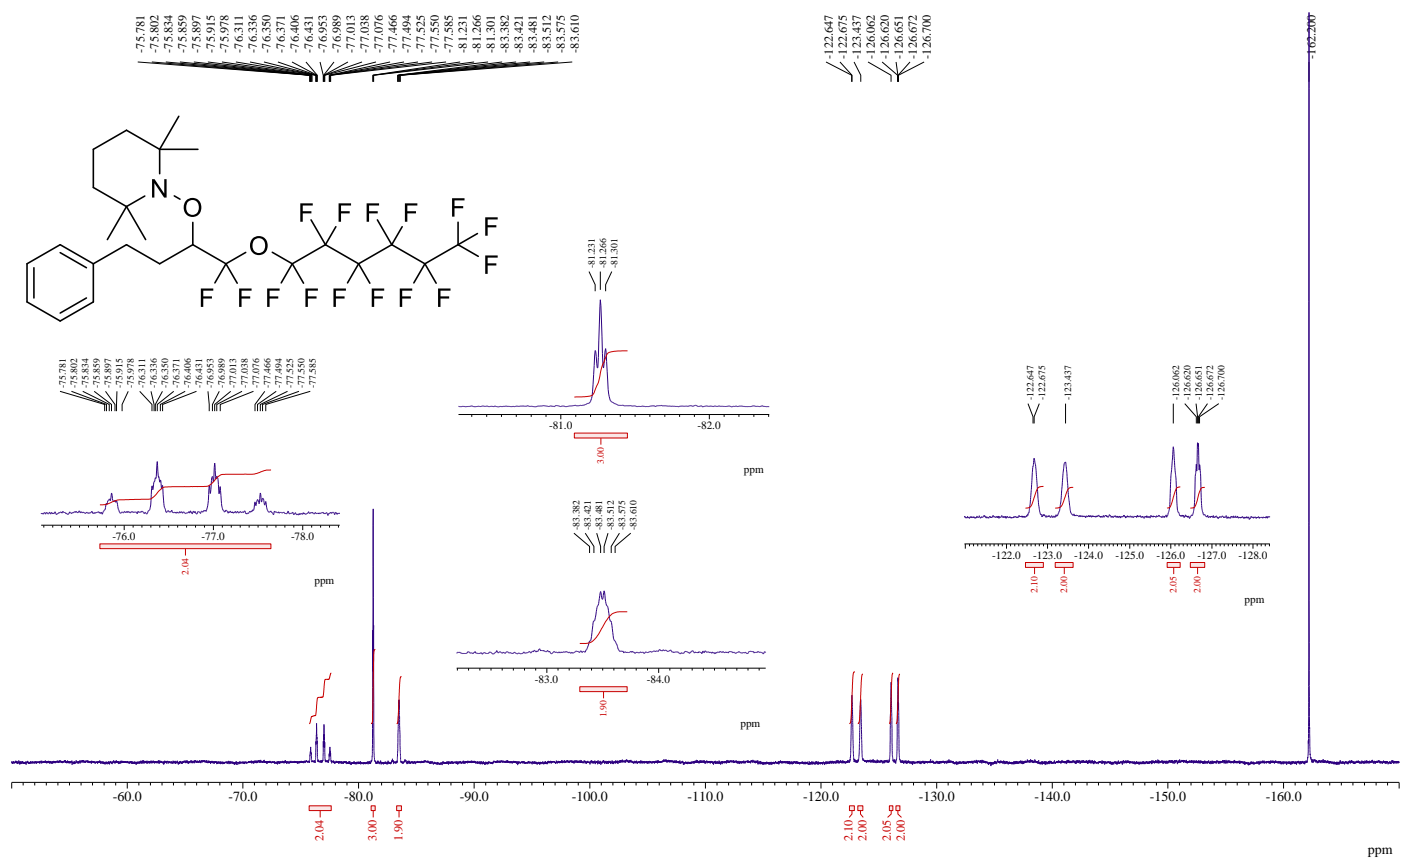



<sup>1</sup>H NMR (500 MHz, CDCl<sub>3</sub>): **8**

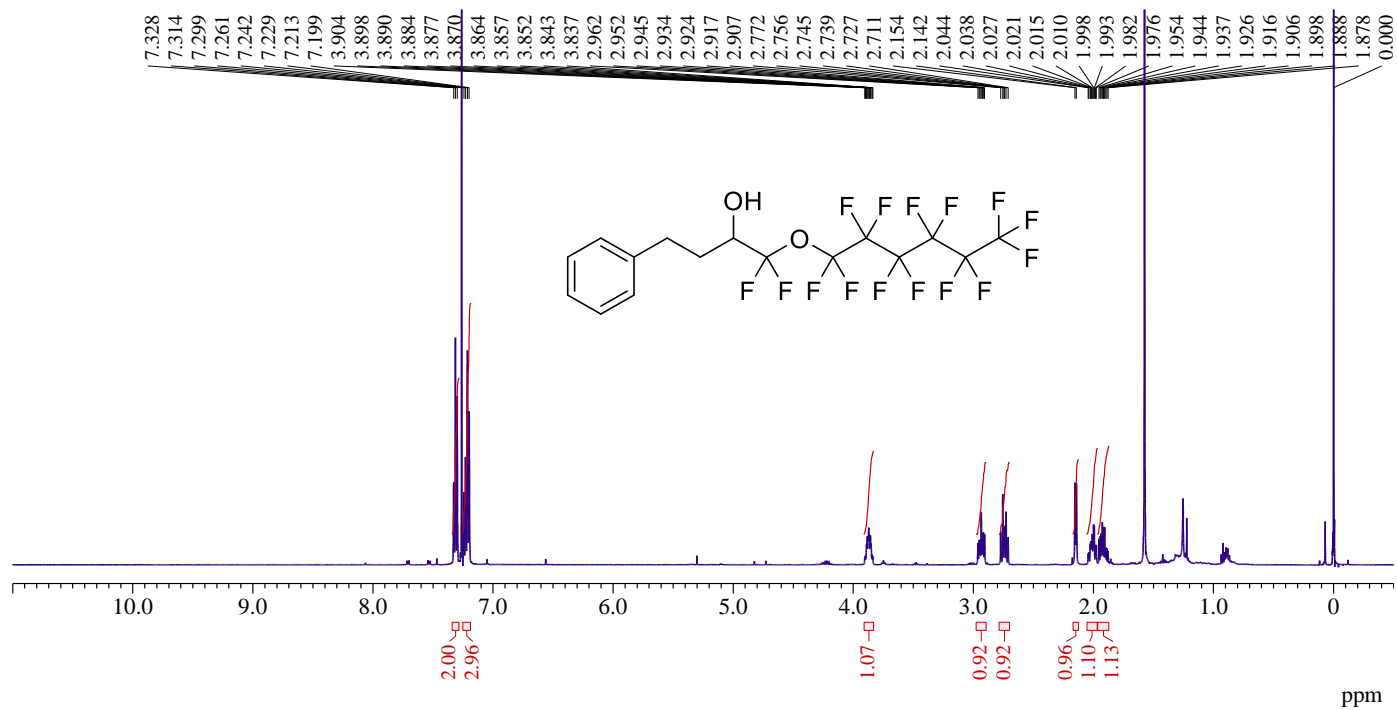

<sup>13</sup>C NMR (126 MHz, CDCl<sub>3</sub>): **8**

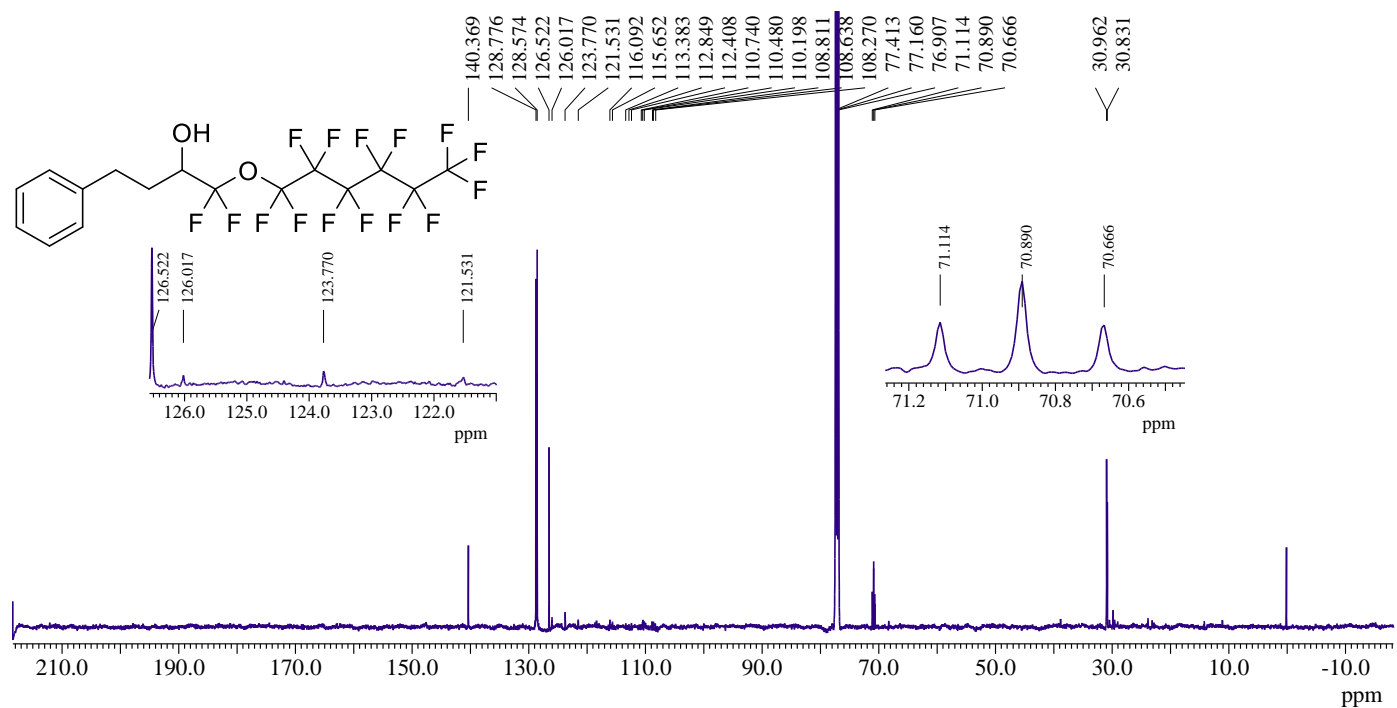

**<sup>19</sup>F NMR (282 MHz, CDCl<sub>3</sub>): 8**

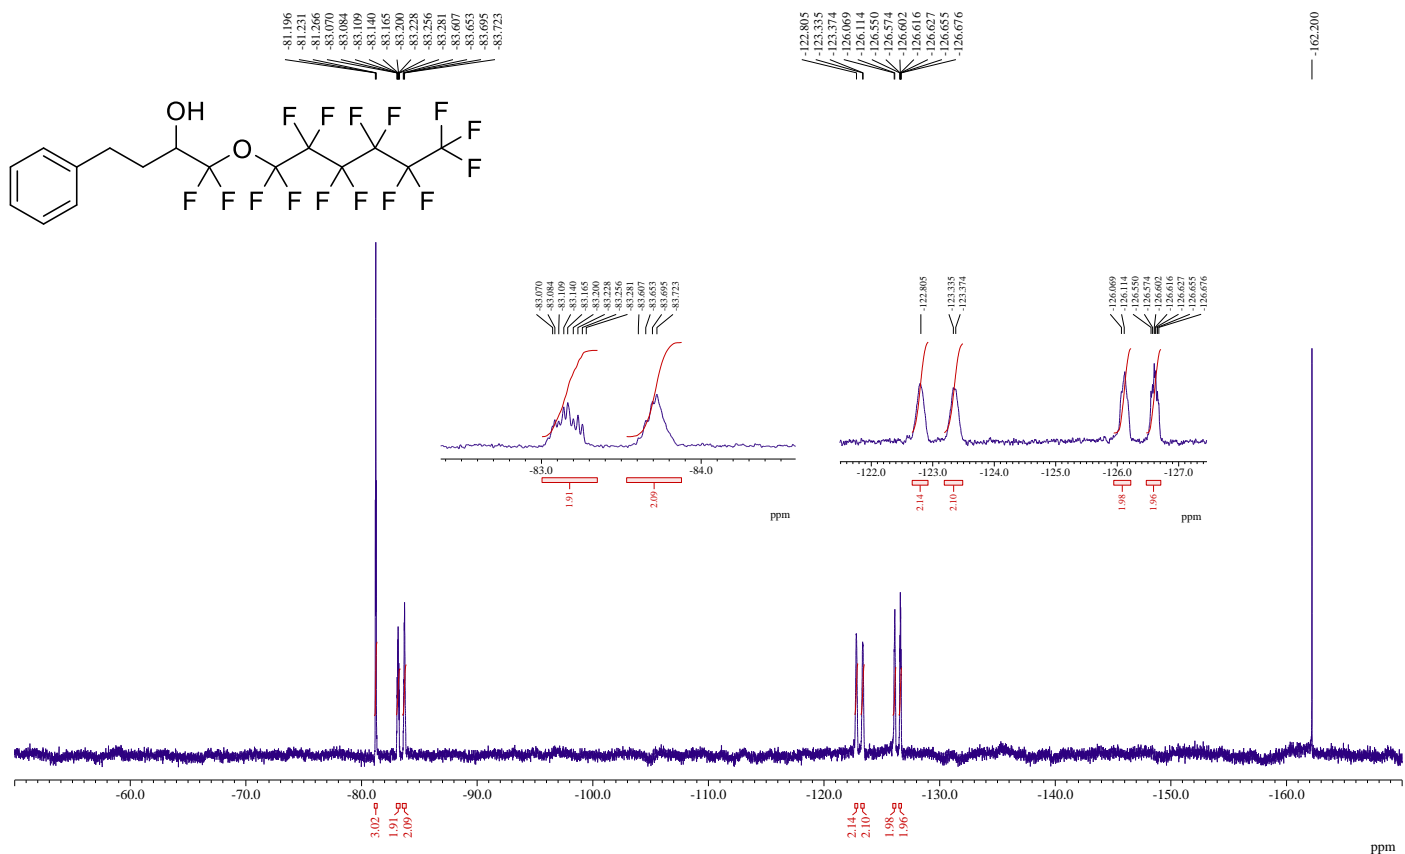

**<sup>1</sup>H NMR (500 MHz, CDCl<sub>3</sub>): 9**

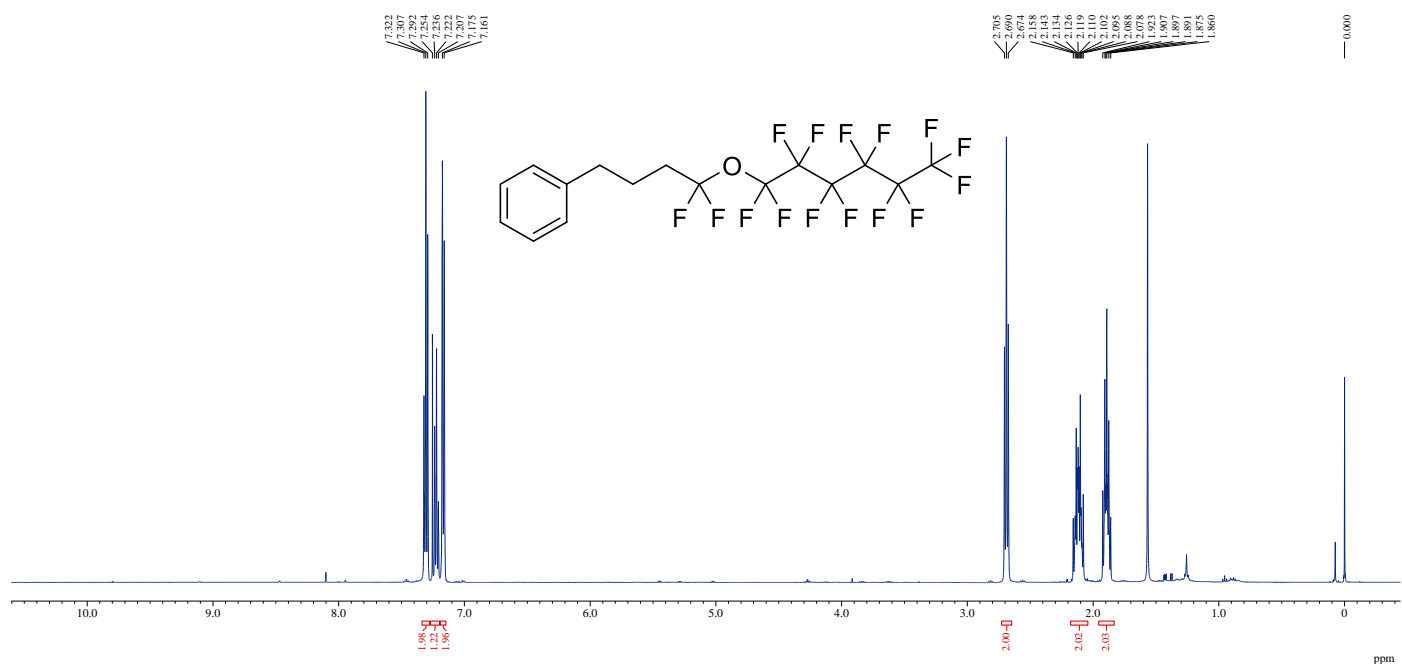

**$^{13}\text{C}$  NMR (126 MHz,  $\text{CDCl}_3$ ): 9**

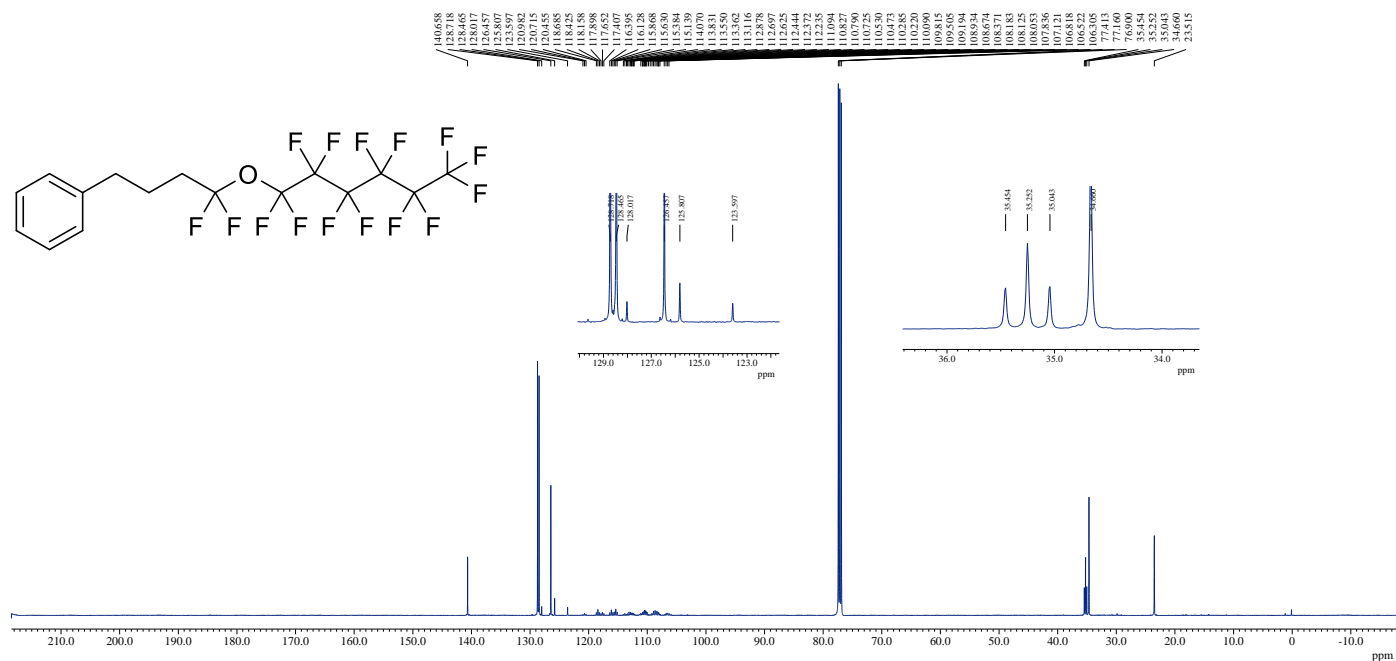

**$^{19}\text{F}$  NMR (282 MHz,  $\text{CDCl}_3$ ): 9**

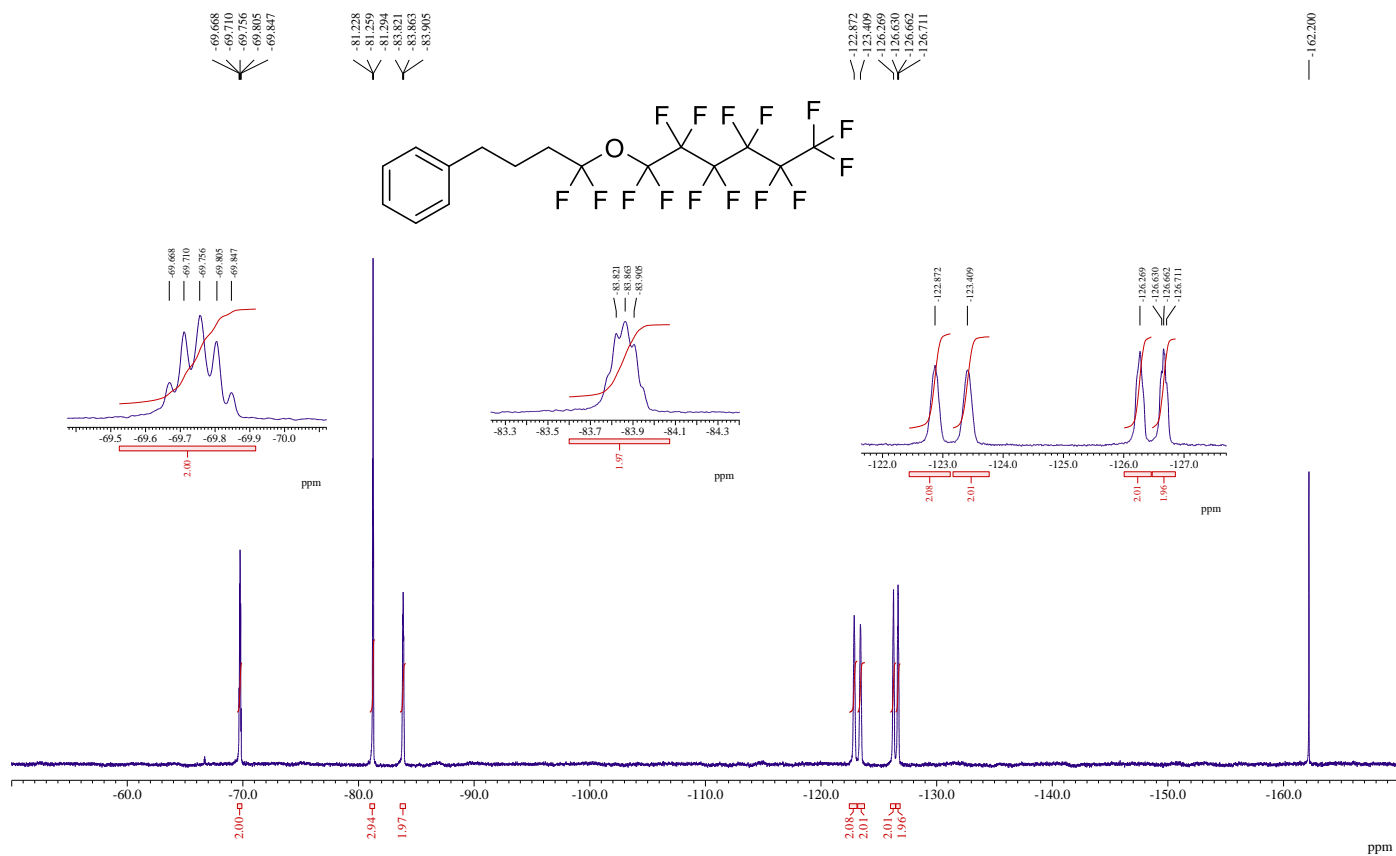

<sup>1</sup>H NMR (500 MHz, CDCl<sub>3</sub>): 10

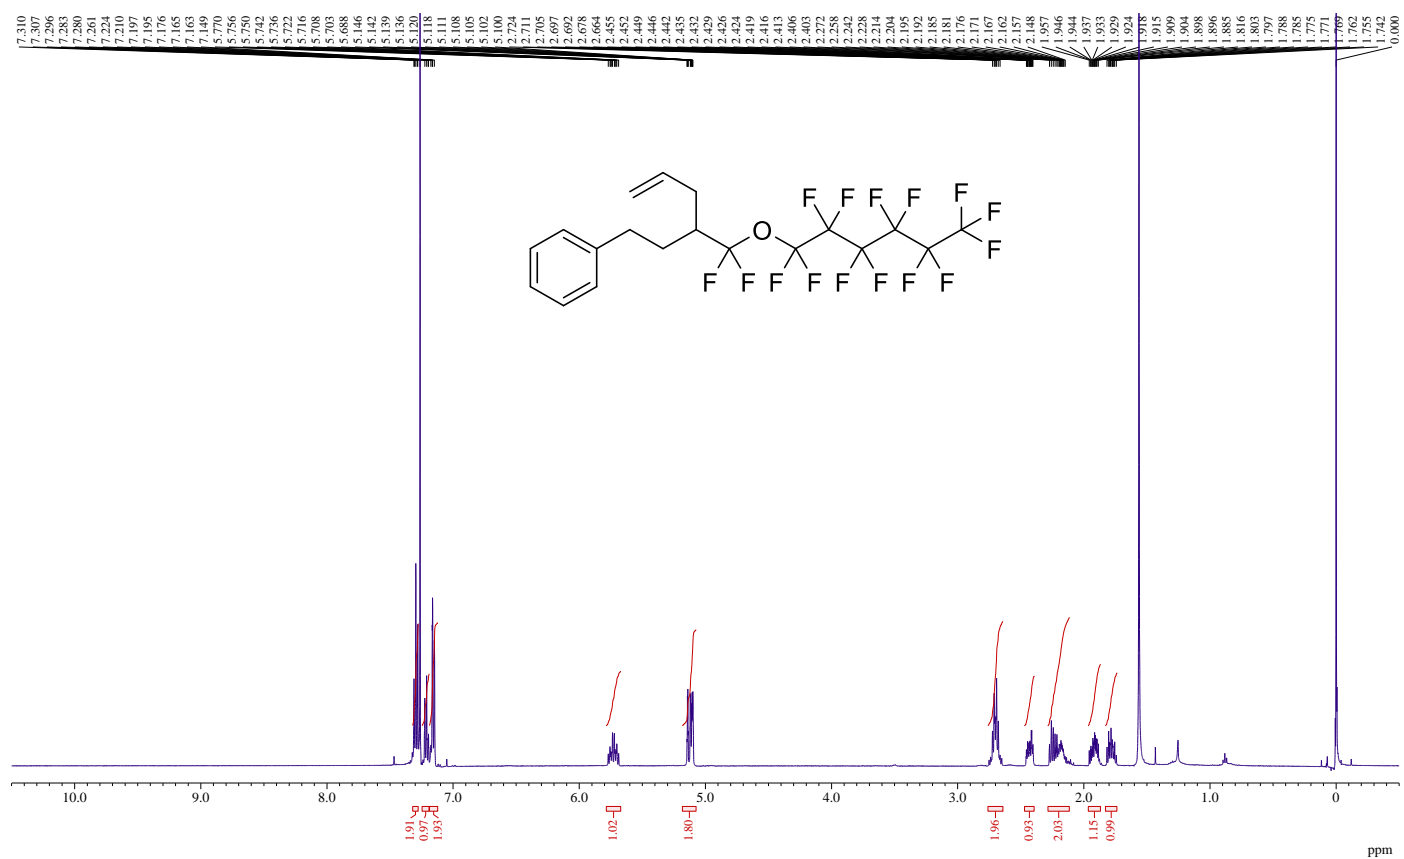

<sup>13</sup>C NMR (126 MHz, CDCl<sub>3</sub>): 10

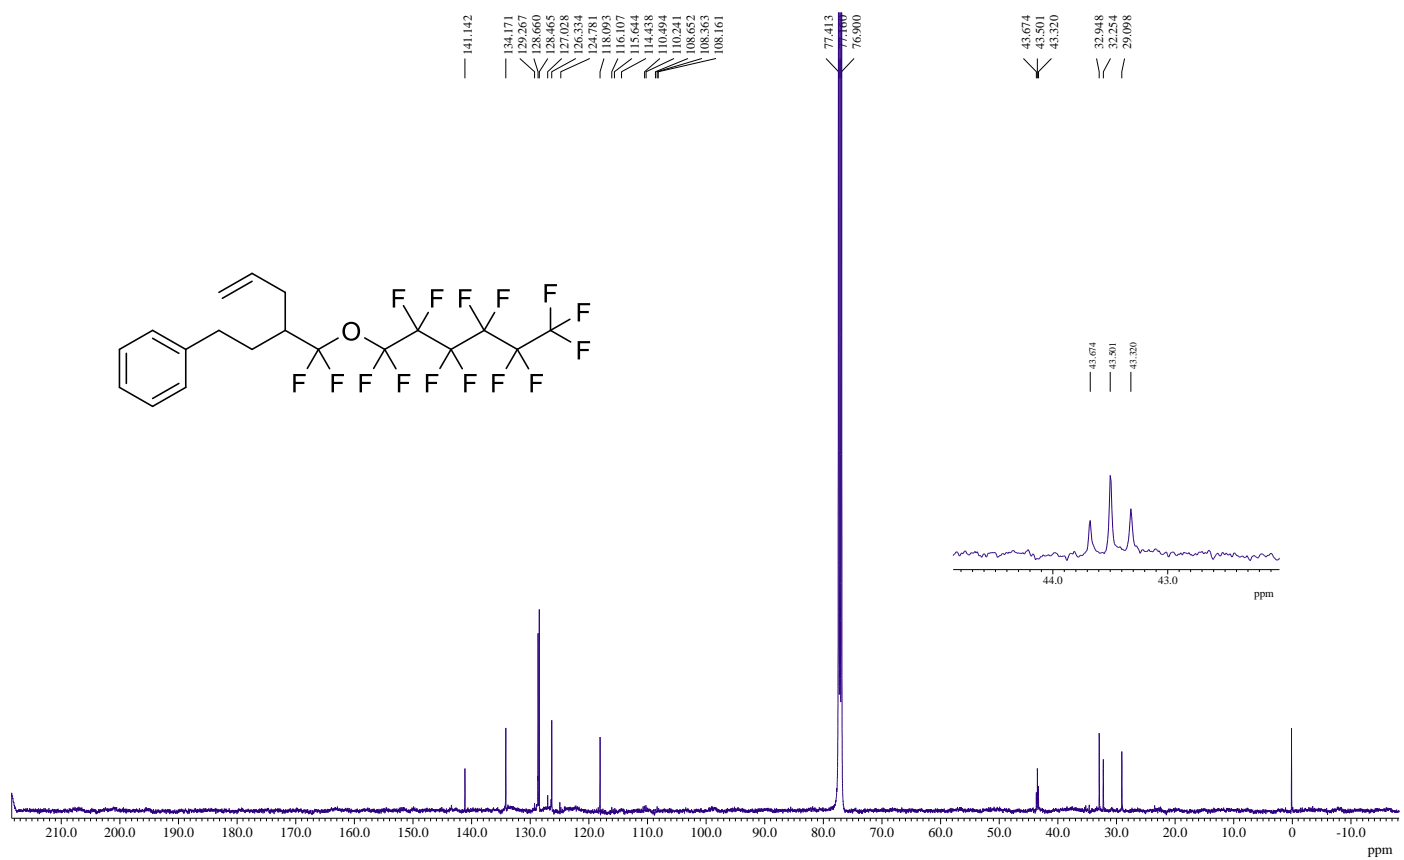

<sup>19</sup>F NMR (282 MHz, CDCl<sub>3</sub>): 10

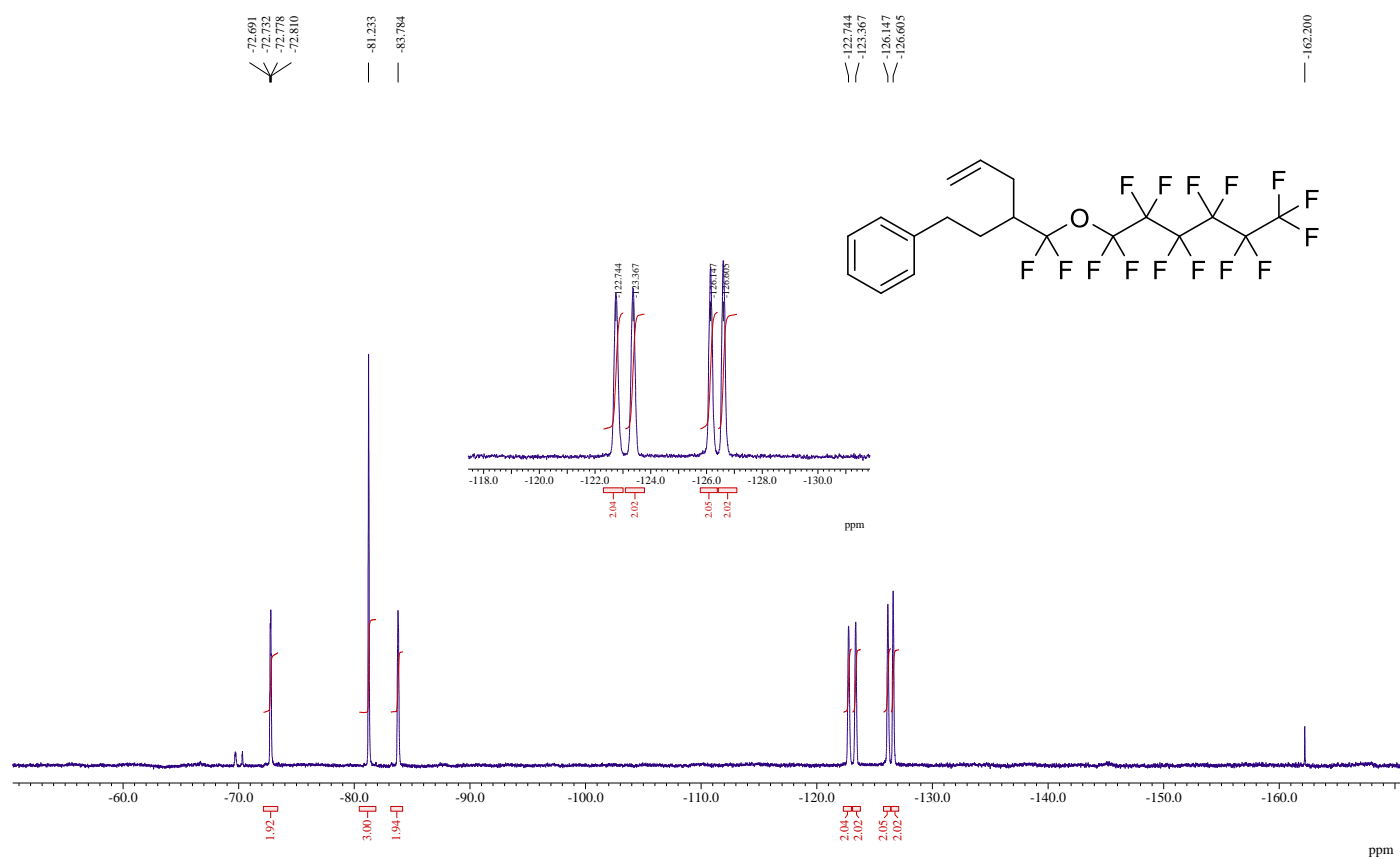

<sup>1</sup>H NMR (500 MHz, CDCl<sub>3</sub>): 11

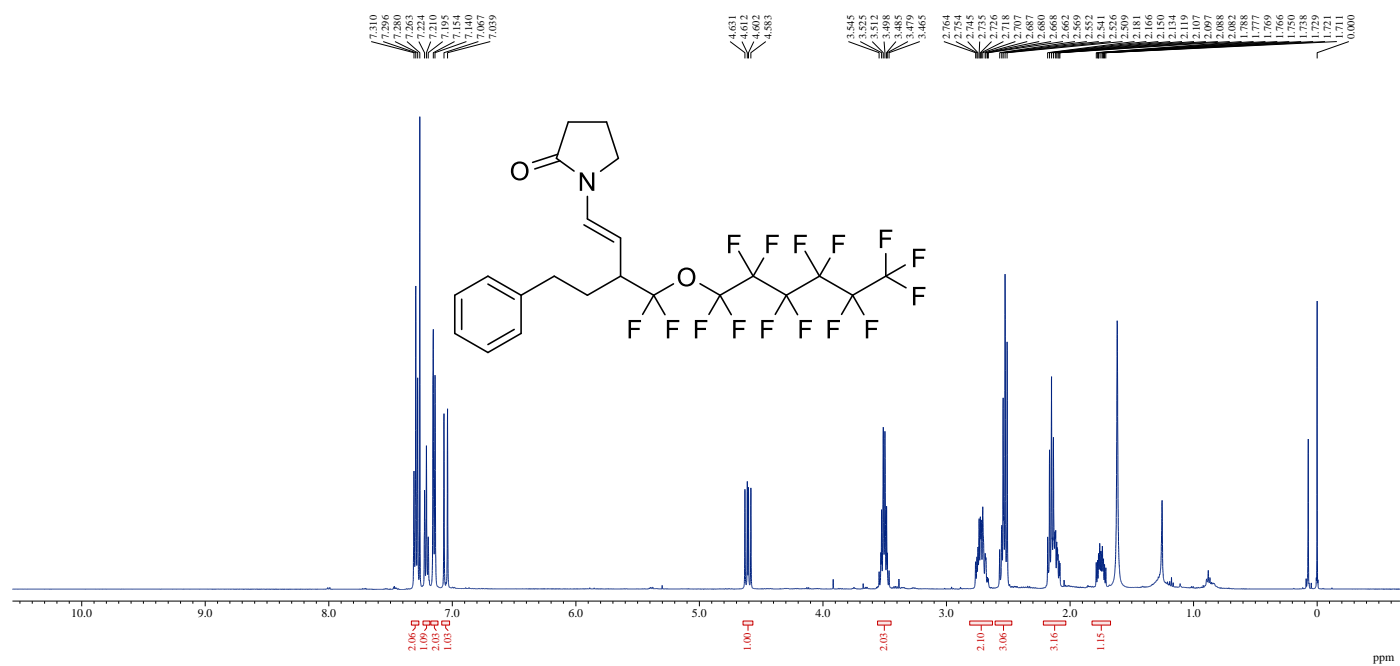

<sup>13</sup>C NMR (126 MHz, CDCl<sub>3</sub>): 11

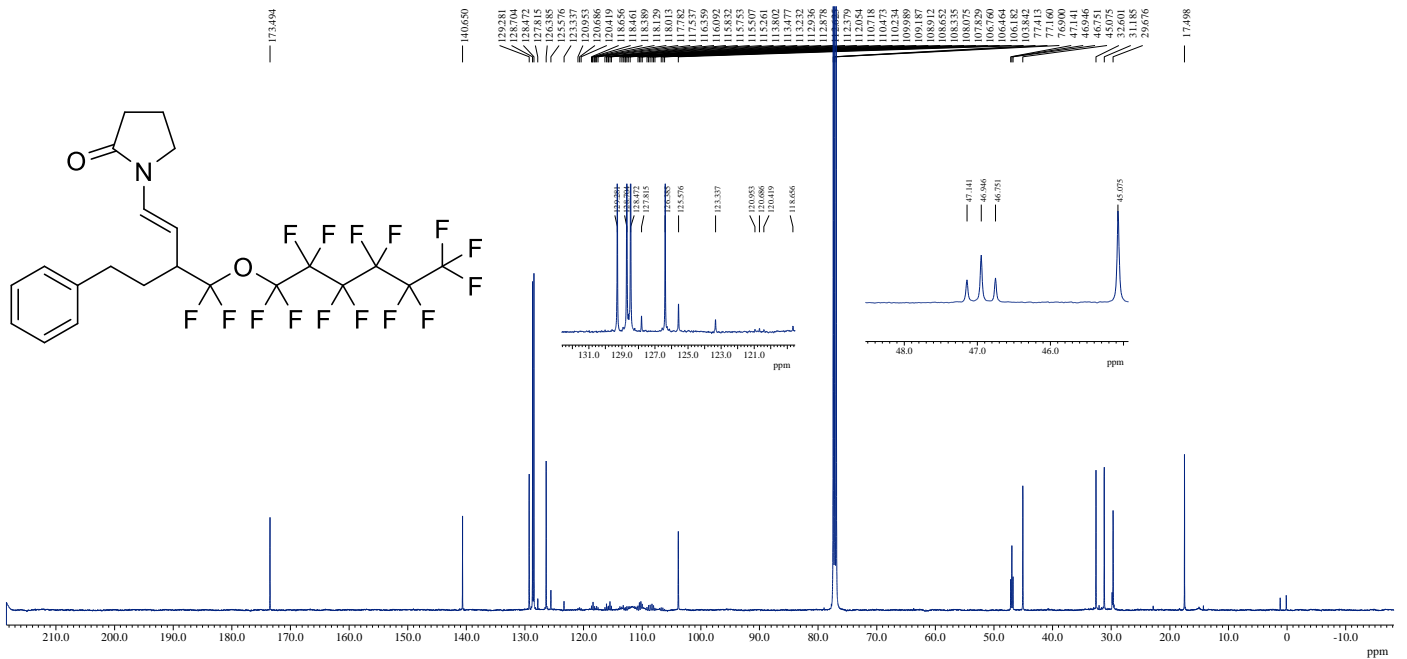

<sup>19</sup>F NMR (282 MHz, CDCl<sub>3</sub>): 11

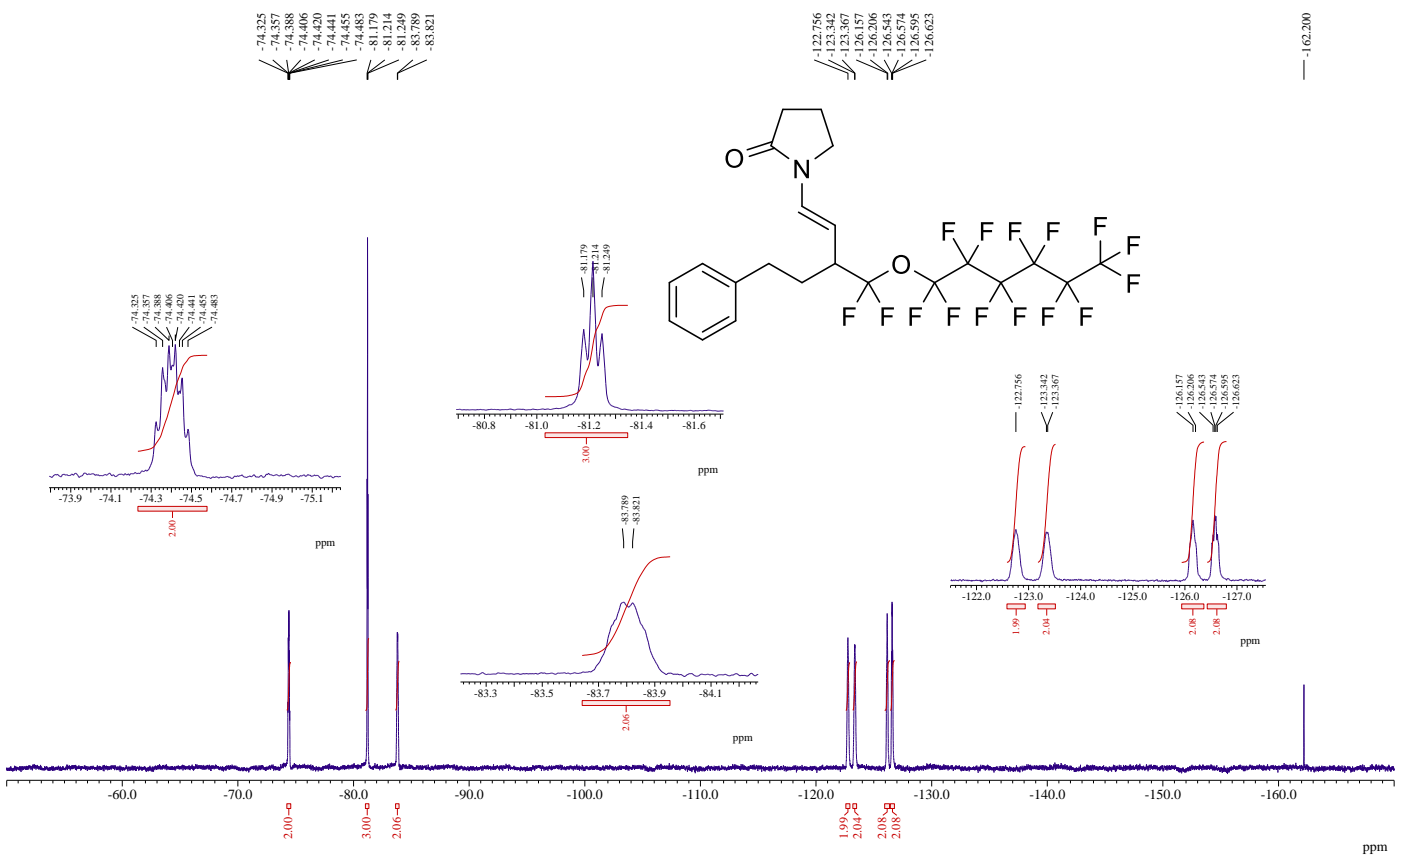

<sup>1</sup>H NMR (500 MHz, CDCl<sub>3</sub>): 12

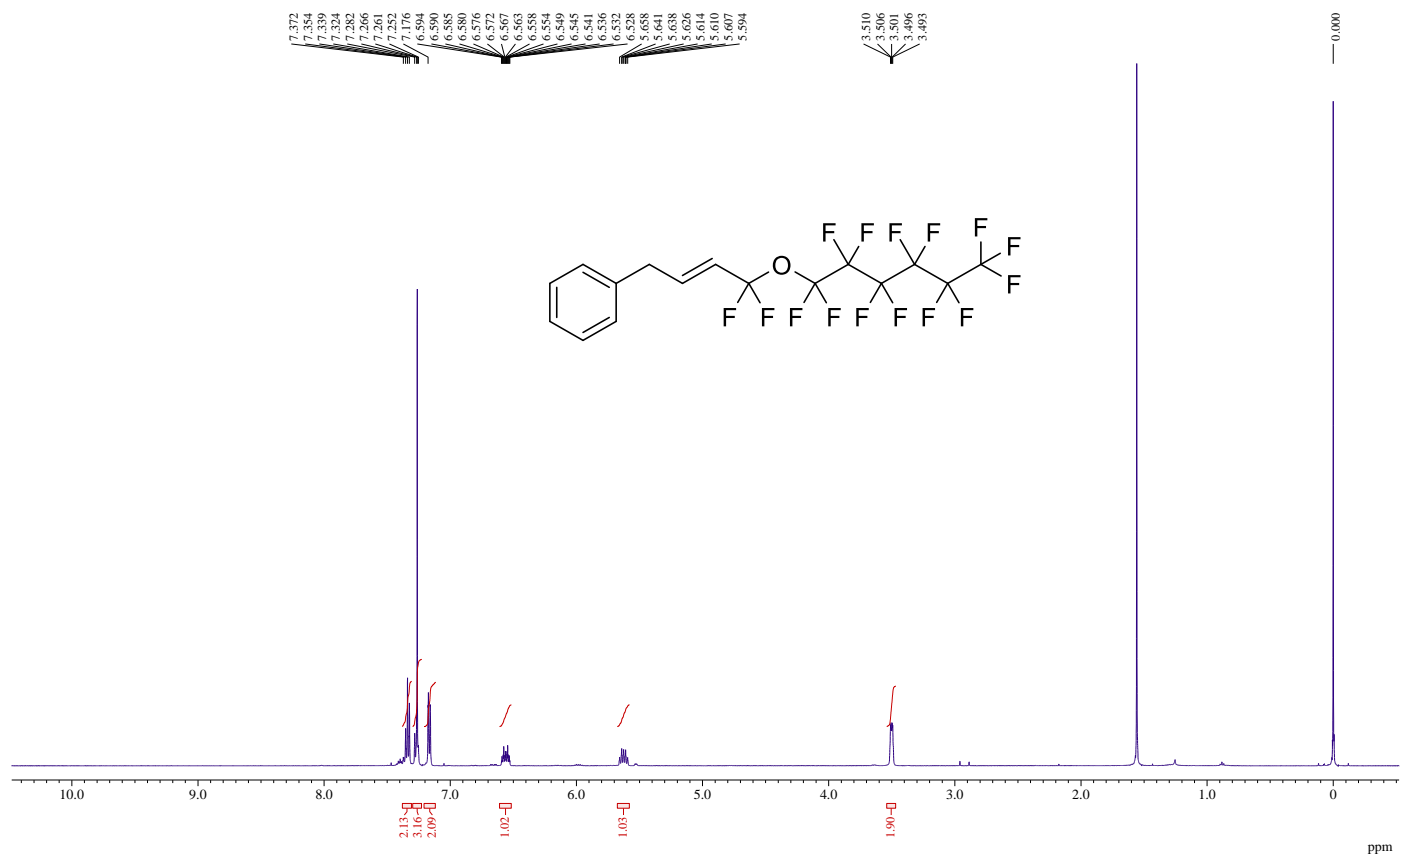

<sup>13</sup>C NMR (126 MHz, CDCl<sub>3</sub>): 12

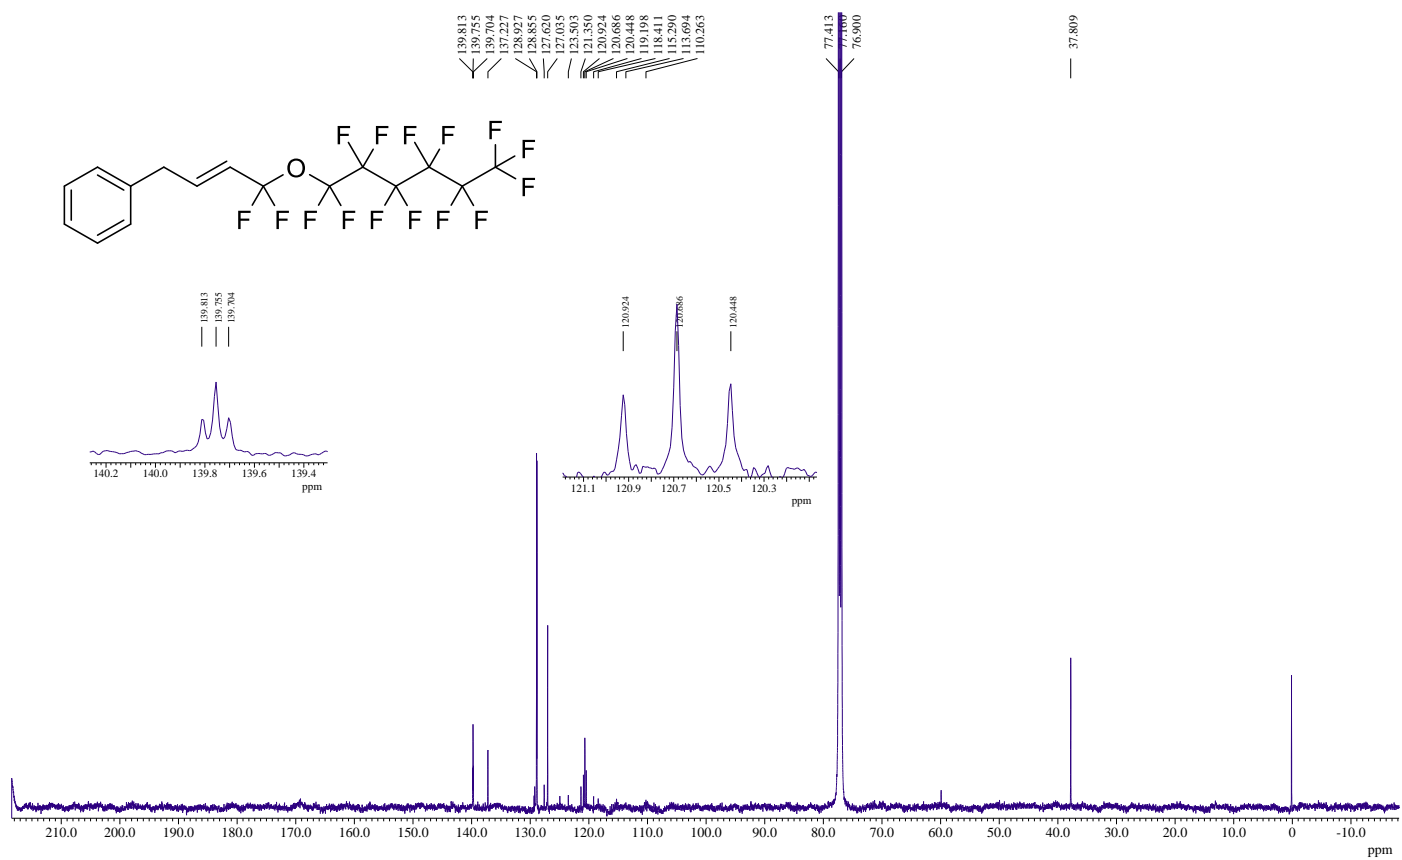

<sup>19</sup>F NMR (282 MHz, CDCl<sub>3</sub>): 12

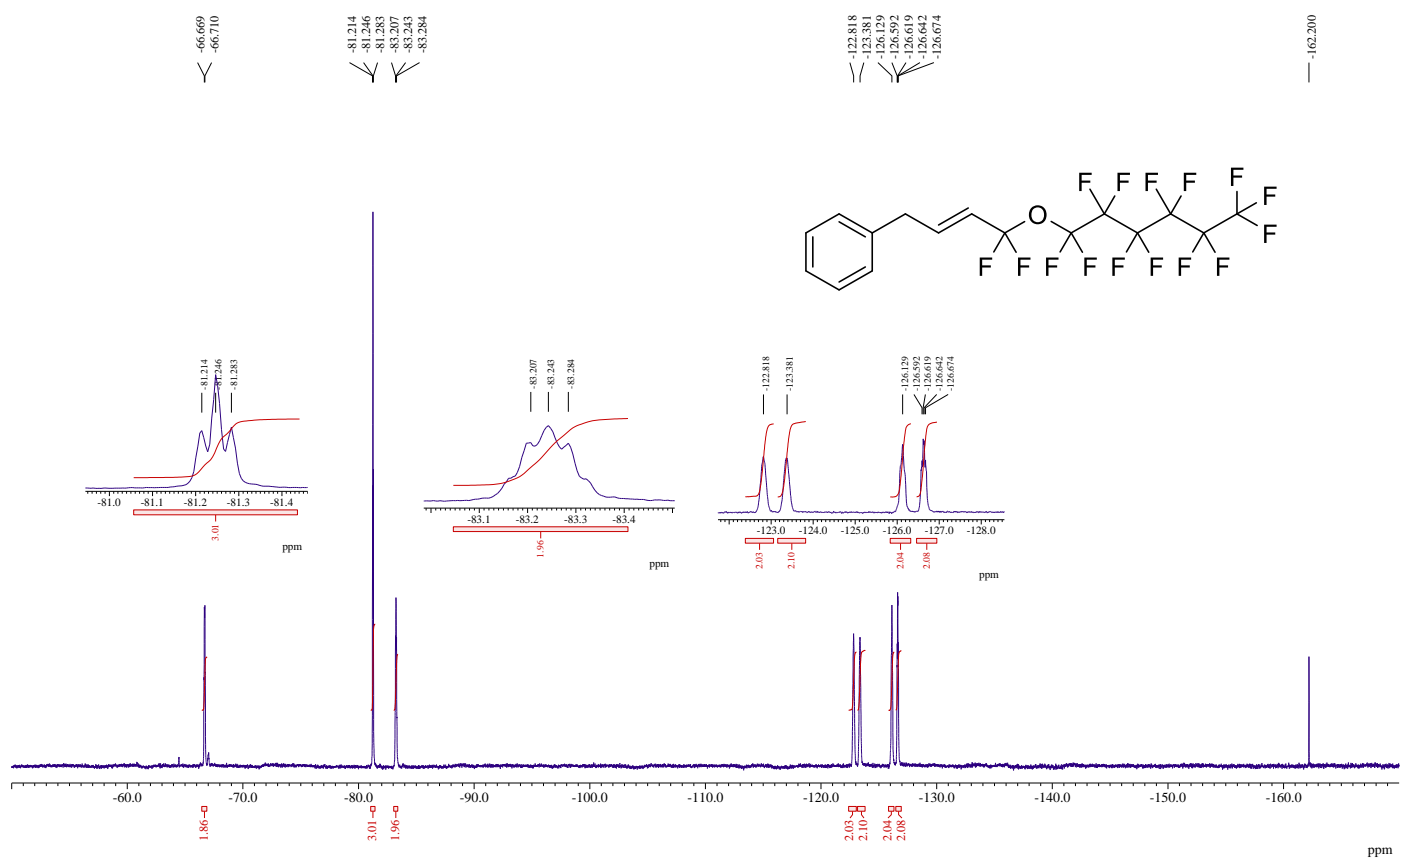

Supplement: d4sc02084g1.pdf [file d4sc02084g1.pdf]
